# Supplementary material for: Transferability, development of simple sequence repeat (SSR) markers and application to the analysis of genetic diversity and population structure of the African fan palm (Borassus aethiopum Mart.) in Benin
Source: BMC Genet. 2020 Dec 3;21:145. doi: 10.1186/s12863-020-00955-y (PMC7713368; doi:10.1186/s12863-020-00955-y)
Supplement: Supplementary file 1 — Additional file 1. List and characteristics of putative microsatellite loci identified in the genome of Borassus aethiopum through QDD analysis. Characteristics (basic motif, length) of the microsatellite loci and of the primer pairs (length, position, Tm, stability, amplicon size and sequence) designed for their targeted amplification. [file 12863_2020_955_MOESM1_ESM.xlsx]

## Sheet: cleaned QDD output
Locus Name	SEQUENCE_CODE	NUMBER_OF_READS	TARGET_REGION_FIRST_POS	TARGET_REGION_LENGTH_IN_BP	TARGET_MS_LENGTH_IN_REPEAT_NUMBER	NUMBER_OF_MS (1.5 for 1 compound, 1 for 1 pure)	MOT_TRANS	TARGET_REGION_SEQ	POLYMORPH	ONE_PRIMER_FOR_EACH_SEQ	ONE_PR_FOR_EACH_TARGET_REGION	PCR_PRIMER_ALIGNSCORE	MIN_PRIMER_TARGET_DIST	PCR_PRODUCT_SIZE	PCR_PRODUCT_SEQ	PRIMER_LEFT_SEQUENCE	PRIMER_RIGHT_SEQUENCE	PRIMER_LEFT_DIST_FROM_MS	PRIMER_RIGHT_DIST_FROM_MS	PRIMER_LEFT_FIRST_POS	PRIMER_LEFT_LENGTH	PRIMER_RIGHT_FIRST_POS	PRIMER_RIGHT_LENGTH	PRIMER_LEFT_TM	PRIMER_RIGHT_TM	PRIMER_LEFT_END_STABILITY	PRIMER_RIGHT_END_STABILITY	PRIMER3_PENALTY	DESIGN	SEQUENCE_LENGTH	SEQUENCE
MBo01	M00842:287:000000000-BGGT4:1:1113:11000:7106	1	185	21	7	1	AGG	TCCTCCTCCTCCTCCTCCTCC	NA	1	1	3	0	90	CCTATCCTTCCATCCCGATCGtcctcctcctcctcctcctccTCGGCCGAATCGGCATTGTCGGGTGTCTTTGAGGCTGATTCACGGCAA	CCTATCCTTCCATCCCGATCG	TTGCCGTGAATCAGCCTCAA	0	28	164	21	253	20	59.521	60.251	3.69	3.02	1.72919	A	392	ACGCTTACAAAGAGTGTCGACAGTTGACGATGCTCTCGCAGACCTTTCACGATGCTTTTAAGCATCGGGCATTGACGACGCTTTCTAGCATCATTAGGCCTCTCCCaaaaaCCGGTGaaaaaCTTTACCTTTCCCATTCCCACGAttttttCCCCTTCCCTCTCCTATCCTTCCATCCCGATCGtcctcctcctcctcctcctccTCGGCCGAATCGGCATTGTCGGGTGTCTTTGAGGCTGATTCACGGCAACGAGGActcctcctcGGCCGATTCGGTAAGATTTATGGTGTATTTGAATTTCCATAGAGTGTTCTTCGCTAAGATTTATAAGTAGATCTTGGAGCGGGAGGTGAAGATCTCGTAGAGGCGGATGACGTgggggTGGTGG
MBo02	M00842:287:000000000-BGGT4:1:2102:9707:9438	1	35	21	7	1	ATC	TGATGATGATGATGATGATGA	NA	1	1	6	6	115	GGGAGAACAAGGATAACAGCAGGGGCTTtgatgatgatgatgatgatgaTGGAATCAATGAAGATGAAGGAGCAGATGCTGAAAAGAGGaaaaaCCGAGCTAGTGATGAAATGGA	GGGAGAACAAGGATAACAGCAG	TCCATTTCATCACTAGCTCGGT	6	44	7	22	121	22	58.726	59.234	4.24	4.69	6.04055	F	137	CTCATGGGGAGAACAAGGATAACAGCAGGGGCTTtgatgatgatgatgatgatgaTGGAATCAATGAAGATGAAGGAGCAGATGCTGAAAAGAGGaaaaaCCGAGCTAGTGATGAAATGGAGTACGAGGATGGTATC
MBo03	M00842:287:000000000-BGGT4:1:2107:17050:22390	1	146	21	7	1	AGG	CTCCTCCTCCTCCTCCTCCTC	NA	1	1	2	19	131	CTCCGAGCCCTAGCAACTTTACCAAACATAATTTCCCTTCCGTCGCTCATCCTCCCGTCCAGATCGGCGctcctcctcctcctcctcctcGACTCCAACTTCTCCAATTTGTGAAGGTTTCGTCATCCAGA	CTCCGAGCCCTAGCAACTTT	TCTGGATGACGAAACCTTCACA	49	19	77	20	207	22	59.749	59.633	2.66	3.58	2.61775	A	318	AAGCATCGGCAGTTGAGGACATTTCACGACACTTTTAAGCATCGTGAAGCTCCCCACCAttttttttACAAGTTCCCTCCGAGCCCTAGCAACTTTACCAAACATAATTTCCCTTCCGTCGCTCATCCTCCCGTCCAGATCGGCGctcctcctcctcctcctcctcGACTCCAACTTCTCCAATTTGTGAAGGTTTCGTCATCCAGAATGTAGATTtctctcGCTCCCTCTCGTTCTTCCTTCCAATCTTttcttcttcTCATTTCCTTGAATCTCTTCATAGATaaaaaaTTCAAGTAAGTTTTGTTTCTTCTCCTG
MBo04	M00842:287:000000000-BGGT4:1:2104:9199:22183	1	146	21	7	1	ACC	TGGTGGTGGTGGTGGTGGTGG	NA	1	1	4	42	192	GATGTGGCCGCTCTGATCTCTTTGCCCTCATTTGCCCAATGCTGCTCTACATGCATCTACATCCTTCCTGGTTGGTAATGGTTTGGGTAGGGGAGTAGTGATGCAGAGTtggtggtggtggtggtggtggTAGGCATTAATtctctcGAAAGAAGCCTAGCCTGATGCAAATAGAATACCTTGCCAGCATGT	GATGTGGCCGCTCTGATCTC	ACATGCTGGCAAGGTATTCT	89	42	37	20	228	20	60.6	57.185	2.75	2.4	3.41453	B	251	AGATCGGAAGAGCGGACTGCCGCCACCTTGCACTTGGATGTGGCCGCTCTGATCTCTTTGCCCTCATTTGCCCAATGCTGCTCTACATGCATCTACATCCTTCCTGGTTGGTAATGGTTTGGGTAGGGGAGTAGTGATGCAGAGTtggtggtggtggtggtggtggTAGGCATTAATtctctcGAAAGAAGCCTAGCCTGATGCAAATAGAATACCTTGCCAGCATGTATAAGTATATTGAGGAAATTCCT
MBo05	M00842:287:000000000-BGGT4:1:1111:25660:9338	1	148	21	7	1	AAG	GAAGAAGAAGAAGAAGAAGAA	NA	1	1	2	49	202	GTCCTAGCACGCTGGCATTAAGATTCTCTTGCTCActctctCCCTCTTGAAATAATaaaaaGAATTAATAAATAGAAATAAATGGGAAGAAAGGATGGGGAGGAGTTTAAATgaagaagaagaagaagaagaaAGGGGAAGGAAAGAGTTggggggggTGTGGCATAGCTGGTTGCGGCGGCAAGGGTTCATTGGCAACCCA	GTCCTAGCACGCTGGCATTA	TGGGTTGCCAATGAACCCTT	92	49	36	20	237	20	60.179	60.105	1.9	3.95	0.28433	F	237	GTTTAAGGTGGTTTAGGTCTACTAGTAGTTTGGTGGTCCTAGCACGCTGGCATTAAGATTCTCTTGCTCActctctCCCTCTTGAAATAATaaaaaGAATTAATAAATAGAAATAAATGGGAAGAAAGGATGGGGAGGAGTTTAAATgaagaagaagaagaagaagaaAGGGGAAGGAAAGAGTTggggggggTGTGGCATAGCTGGTTGCGGCGGCAAGGGTTCATTGGCAACCCA
MBo06	M00842:287:000000000-BGGT4:1:2107:16374:24973	1	215	21	7	1	ATC	ATCATCATCATCATCATCATC	NA	1	1	2	33	202	TGGCCATTCAACTGCTTCACTATGGTTTCTGATATTCTCCTAGGTTTATTAGTAttttttttCCCTCAAAATTTTCATGTTTTGGGCGAAAACAAGTGTAGCTCTAAAATGtttttAATAACTTTATatcatcatcatcatcatcatcATTATCATTAtttttGGACAGGTGGTAAGGGTGGGGTTTGCTGGTGCTAGATTC	TGGCCATTCAACTGCTTCAC	GAATCTAGCACCAGCAAACCC	107	33	88	20	289	21	59.039	59.254	3.18	4.11	2.70667	F	351	ATTTATTTGATTTCTCCAGGGAAATTTTATTTCTTTAGCTTTGTTATGTTGTTTTCTCTTAAtttttGAACTCCTTTGCTTTATCTTTGGCCATTCAACTGCTTCACTATGGTTTCTGATATTCTCCTAGGTTTATTAGTAttttttttCCCTCAAAATTTTCATGTTTTGGGCGAAAACAAGTGTAGCTCTAAAATGtttttAATAACTTTATatcatcatcatcatcatcatcATTATCATTAtttttGGACAGGTGGTAAGGGTGGGGTTTGCTGGTGCTAGATTCTGATTTAGATCATTTGCCTGCTTTCTTAGGTGTTAAAATAATGATCCAAGGTACTTAGTCCG
MBo07	M00842:287:000000000-BGGT4:1:1102:6968:14117	1	197	21	7	1	AAG	AGAAGAAGAAGAAGAAGAAGA	NA	1	1	12	23	239	GGCACTGGAGTCCACATCAAACAAGTGAAAGAAAAGGGCACTTTGAGGTTCCAATTGAGgagagaAGCTTGTTGGTTTAATACTGAAAATGAGATGCAAGTTACATAAAGAAGATTCCAGAGTCTGCATCCaaaaaaTGAAAGGAAAGGGTACTTTGAGGTTCCAATTGAGCAGagaagaagaagaagaagaagaAGCTTGTTTATTTATACTGGAAAAGAGATGCCAGTACAGAAGGA	GGCACTGGAGTCCACATCAA	TCCTTCTGTACTGGCATCTCT	154	23	23	20	261	21	59.963	57.893	2.57	3.1	3.14413	F	341	GTTACACAAGGAAAACAAATAAGGCACTGGAGTCCACATCAAACAAGTGAAAGAAAAGGGCACTTTGAGGTTCCAATTGAGgagagaAGCTTGTTGGTTTAATACTGAAAATGAGATGCAAGTTACATAAAGAAGATTCCAGAGTCTGCATCCaaaaaaTGAAAGGAAAGGGTACTTTGAGGTTCCAATTGAGCAGagaagaagaagaagaagaagaAGCTTGTTTATTTATACTGGAAAAGAGATGCCAGTACAGAAGGAAAACAAAGAAGACTCTAGAGTCCACATCCAACAAATTAAAGAAAAGGGCACTTTGAGGCTCCAATTGAGAAgaggaggag
MBo08	M00842:287:000000000-BGGT4:1:2110:9814:12791	1	154	24	8	1	AGG	CCTCCTCCTCCTCCTCCTCCTCCT	NA	1	1	5	4	90	TGATTGTTTCCTCTTCCCTCCTATCCTCCTATTCAGATCGGcctcctcctcctcctcctcctcctTCTCGGCTCCTCTTCGGCTCATTAA	TGATTGTTTCCTCTTCCCTCCT	TTAATGAGCCGAAGAGGAGCC	19	4	113	22	202	21	58.74	59.861	3.69	4.7	4.39926	A	384	GACATTCACGACACTTTTAAGTGTCGGGCATGTTTTGCATatgatgatgCTTTCTAGTGTTTTCAAGCTTCTCCTaaaaaTTGACTCCCAGTGaaaaaCTTTACCTTTCCTATGATTGTTTCCTCTTCCCTCCTATCCTCCTATTCAGATCGGcctcctcctcctcctcctcctcctTCTCGGCTCCTCTTCGGCTCATTAAATCAGTTGTAGTTTGTTTGATGGTATGCGCTACTTAGATAACCATAGTAATTCTAGAGCTAATACGTGCAACAAACCCCGACTTTTAAAAGGGGTGCATTTATTAGGCCGAAGGCTGACACGGGCTCCGCCCGtctctcCGATGATTCATGATAACTCGACGGACCGCACAGCCCAAGTGCC
MBo09	M00842:287:000000000-BGGT4:1:1101:16859:20040	1	61	24	8	1	AGG	CCTCCTCCTCCTCCTCCTCCTCCT	NA	1	1	4	11	163	TCCCTCACTCCCATCCTCTCGTCCAAATTGGcctcctcctcctcctcctcctcctCGGCTCCTATGATAGCATCATATGGTGTAAATAGTTTGTTTAAGCTTCCTGTGCTTATGTTTTCCTTATGCCTTTTCAGTAAATAATGTATGAGGGAAGGAGTGGAGT	TCCCTCACTCCCATCCTCTC	ACTCCACTCCTTCCCTCATACA	11	86	30	20	192	22	59.737	59.956	3.2	2.29	2.30766	A	337	AGTGAGtttttCCATAGCttttttCCCCTTCCCTCACTCCCATCCTCTCGTCCAAATTGGcctcctcctcctcctcctcctcctCGGCTCCTATGATAGCATCATATGGTGTAAATAGTTTGTTTAAGCTTCCTGTGCTTATGTTTTCCTTATGCCTTTTCAGTAAATAATGTATGAGGGAAGGAGTGGAGTTTTACAGCAATGGAGATGTGTATGAgggggAGTTCCACTAGGGTAAATGTAATGGGAGCAGGTGTATAGtttttttGGGAAGGGGAGGTACGAgggggATTGGGTTGATGGGAAGTATGACGGGTACAGGGTCAAGAGCTGGGTG
MBo10	cons_gr154_2	2	333	24	8	1	AAC	ACAACAACAACAACAACAACAACA	NO	1	1	3	4	166	GTTAAAGACGCAGGGCTGGAAGAGATTTTGCTCTTTGGACATTCTAATTTATCTCAGGTTAGTGTATCAATTTTATGAAAATATGAAAATAGAGACAAATAGCATCAGTTCTATacaacaacaacaacaacaacaacaATACTCAAGTCTTATCTCACTAAGTGGG	GTTAAAGACGCAGGGCTGGA	CCCACTTAGTGAGATAAGACTTGA	94	4	219	20	384	24	60.321	57.468	3.86	3.02	6.8528	A	394	CAAAATGGTCCCTGCAAAGCTGTAGTGTCTAGAAGAAGGAGATTTCCCAATGAAACATCAAAGGAACGGAGGATAAAAGCACAAAATGACTATGAAGAGCTAGGAATGGTGGAAGCCGAGCTACACTCGGTTGTTTCTATGATCAATCGACCCATGACCACTAGTCGAATGGTCTCCTTTAACtttttAGAAGTGGAGAATTTTAAAATAGGGCACTAGTTAAAGACGCAGGGCTGGAAGAGATTTTGCTCTTTGGACATTCTAATTTATCTCAGGTTAGTGTATCAATTTTATGAAAATATGAAAATAGAGACAAATAGCATCAGTTCTATacaacaacaacaacaacaacaacaATACTCAAGTCTTATCTCACTAAGTGGGGTCGGCTATA
MBo11	M00842:287:000000000-BGGT4:1:1113:9629:24440	1	412	24	8	1	ATC	TCATCATCATCATCATCATCATCA	NA	1	1	3	11	219	GCATCACATGGTTTCAGGCTAACAAAGCCATCCTAACAATATCATAATACAACTAAGTTTTATATTAGACCGTATTAAATAACAGTAGATATCATGGGAAAAGGACCTATGAGTTTTaaaaaaaaaaTCAAGTATAATAAAATAAAGATGCAGCATCGGTTTATtcatcatcatcatcatcatcatcaTTATTTAATACTACACTGCCGATGGTTGAGC	GCATCACATGGTTTCAGGCT	GCTCAACCATCGGCAGTGTA	144	11	248	20	466	20	58.82	60.391	4.58	2.9	1.57116	F	470	CTTTGtatataAtttttCTCttttttCAAATCTAAGGTGCTCTTCACATGCACGTACTAAATTAAACaaaaaTTAAAGTCCTCGTTCACACTACACCATGTCCTTTaaaaaTAGTGTTAGGTGCATAAGCAGACAAAGATCATGTCCTATTCTTACTGAAATGGAATCCTTATTGTTTACCAAGCACTCCCATGGAGAAACTACCAAAACAATAGATTAGCTTCATTTGTTTATCCATTCTCCATCTGCATCACATGGTTTCAGGCTAACAAAGCCATCCTAACAATATCATAATACAACTAAGTTTTATATTAGACCGTATTAAATAACAGTAGATATCATGGGAAAAGGACCTATGAGTTTTaaaaaaaaaaTCAAGTATAATAAAATAAAGATGCA…
MBo12	M00842:287:000000000-BGGT4:1:1105:20942:16546	1	209	27	9	1	ATC	TGATGATGATGATGATGATGATGATGA	NA	1	1	2	12	102	GGAGGAAAGGTTGCCCTAGAAGAAAGGAGGTTGCTAGGAGCTtgatgatgatgatgatgatgatgatgaTACATCTGCTTATGCAATGACATCAGGTTGAGA	GGAGGAAAGGTTGCCCTAGAA	TCTCAACCTGATGTCATTGCA	21	12	167	21	268	21	59.366	57.578	2.1	4.08	5.05586	A	290	CTCTTTCTTTAAATACTCACTATCTGGTCCGCCGAGTTGATTGACTGCCTCTATAAAACGTTCATGGAGCTCAGGAGTCCATTTCAATCTAGGCTTCGCATCGGTTgagagaACTAGTCCTGACTCTCCTGGACCACTTCCACTTTGCaaaaaCAAACGCctctctGGAGGAAAGGTTGCCCTAGAAGAAAGGAGGTTGCTAGGAGCTtgatgatgatgatgatgatgatgatgaTACATCTGCTTATGCAATGACATCAGGTTGAGATCATCAAGAAAGGAGACAGACC
MBo13	M00842:287:000000000-BGGT4:1:1113:19660:17054	1	35	27	9	1	AAG	CTTCTTCTTCTTCTTCTTCTTCTTCTT	NA	1	1	4	5	103	CAGGTTGCATCGGCCCATTCGGCCcttcttcttcttcttcttcttcttcttTTCTTTAATTGACTTGGGTTGGGttttttGAGCTCTGGGTGCATTAGGCTCC	CAGGTTGCATCGGCCCATT	GGAGCCTAATGCACCCAGAG	5	32	11	19	113	20	61.054	60.179	3.16	3.35	2.2329	F	361	CCTGTGCGCCCAGGTTGCATCGGCCCATTCGGCCcttcttcttcttcttcttcttcttcttTTCTTTAATTGACTTGGGTTGGGttttttGAGCTCTGGGTGCATTAGGCTCCACCTACCAGGAGCAATCAAAACTACTGAGACAAGTAACCaaaaaTTGTTATGGAAACCTTTTCCAACAGtttttCCAACTATTGTTATTGTCACTGGTAAATATGTCATTGTTGTTTCAACCCTAATGCTTTACACAACCATTaaaaaaGGCAAATTTCAATAGCAGTTGTTTTCAAGATTTGGCAACAtttttttCTATATTGTAAGAAATTTCAACAGCATTCATAACTTCTGCACAAACATTTAT
MBo14	M00842:287:000000000-BGGT4:1:2101:18910:5867	1	36	27	9	1	AAC	TGTTGTTGTTGTTGTTGTTGTTGTTGT	NA	1	1	6	15	117	ATGGCCGATCCCACTTAGTGGGATAAAGGCTTGAGtgttgttgttgttgttgttgttgttgtATCGCTATCTGTTGTATATGTGTCTGttttttGCATAAATTATTGCCGTtctctc	ATGGCCGATCCCACTTAGTG	GAGAGAACGGCAATAATTTATGCA	15	31	1	20	117	24	59.53	57.94	2.74	3.96	6.52994	F	301	ATGGCCGATCCCACTTAGTGGGATAAAGGCTTGAGtgttgttgttgttgttgttgttgttgtATCGCTATCTGTTGTATATGTGTCTGttttttGCATAAATTATTGCCGTtctctcATTTAGAGGTATAATTGTAGAtttttAAATGCCTTTGATCTCTATATTTAGAGGTATtatataGAGATATAATTCGGTATGCTTGGTTAAtttttAGGGTAATCTTCGTGTCCTCCCTAATCTTCACTTCTCatatatGCAGGCTGACTTCATGAAAATGCCATTCTCCGAGCTCTTCCGATCT
MBo15	M00842:287:000000000-BGGT4:1:1108:21450:18488	1	64	30	10	1	AAG	AAGAAGAAGAAGAAGAAGAAGAAGAAGAAG	NA	1	1	13	2	92	GCTGAAGAGGATgaagaagaaGCAAaagaagaagaagaagaagaagaagaagaagAGAAGGAGgaagaagaagaaGGAGAGGGAGATGATGA	GCTGAAGAGGATGAAGAAGAAGC	TCATCATCTCCCTCTCCTTCT	2	16	39	23	130	21	59.377	57.01	3.86	2.85	7.61221	F	130	AAACAAAAGGTATTGATGATATAGTTAAAGTAGCAAAAGCTGAAGAGGATgaagaagaaGCAAaagaagaagaagaagaagaagaagaagaagAGAAGGAGgaagaagaagaaGGAGAGGGAGATGATGA
MBo16	M00842:287:000000000-BGGT4:1:2101:11534:28140	1	270	30	10	1	AGG	CTCCTCCTCCTCCTCCTCCTCCTCCTCCTC	NA	1	1	3	4	118	CAGCACTGGCCTCACAGCCTCCCGCTTCGCCCCACAAGAAAGCCCTAACCCTGGAAGAATCCTctcctcctcctcctcctcctcctcctcctcCTTGTCTCCAACAACTGATCGACGG	CAGCACTGGCCTCACAGC	CCGTCGATCAGTTGTTGGAGA	45	4	207	18	324	21	61.055	60.068	4.4	3.71	4.12235	A	324	GGCGCTCGTCGAGGGGAAAGAAGGAGATCGAGCAAagagagCAACAACGGTCACCTCAGAATCCGTCCTATGGTCGGCGGCATTCCCGTCCTCCCAAATGGAGAATTTGTCTAGATGGTTCGAAAGCAATGCCGAAGATTGCaaaaaCCGGGACACCATCAGATCTCCCAATGCCATCTAATCTAAACCCTccccccTCCTCACCCCAGCACTGGCCTCACAGCCTCCCGCTTCGCCCCACAAGAAAGCCCTAACCCTGGAAGAATCCTctcctcctcctcctcctcctcctcctcctcCTTGTCTCCAACAACTGATCGACGG
MBo17	M00842:287:000000000-BGGT4:1:2109:3938:17688	1	51	30	10	1	ATC	ATGATGATGATGATGATGATGATGATGATG	NA	1	1	6	23	124	ACACAATGACCTTTCGCTGATTAGATCAatcatcatcATAAAAatgatgatgatgatgatgatgatgatgatgATAGAACTGGTACAATGACCCTTCAATTCAATGGCATAAGGTCCTGTTTGG	ACACAATGACCTTTCGCTGA	CCAAACAGGACCTTATGCCA	23	31	8	20	131	20	57.745	57.786	4.26	4.92	4.46892	B	177	AATAATGACACAATGACCTTTCGCTGATTAGATCAatcatcatcATAAAAatgatgatgatgatgatgatgatgatgatgATAGAACTGGTACAATGACCCTTCAATTCAATGGCATAAGGTCCTGTTTGGtttttGAGAACCCTGCGCCGCCGAGCTCATGCCTGCCTCCTGGGCT
MBo18	M00842:287:000000000-BGGT4:1:2111:12735:24471	1	230	30	10	1	AAG	CTTCTTCTTCTTCTTCTTCTTCTTCTTCTT	NA	1	1	10	15	187	ACATCCTCTCCTTCATCTCCtttttCTCCTACTTTTCcttcttcttcttcttcttcttcttcttcttTCTAGTAGTAAAACAATTAGAGACGGTAAGTAGCTGTCGTTAATAGTATCGGTAATAATCttttttAGAAGCTAATCTCCCCATGGGTACTAGTGCAGGTGCGCCAAGCATTGTAGGAAC	ACATCCTCTCCTTCATCTCCTT	GTTCCTACAATGCTTGGCGC	15	100	193	22	379	20	57.994	60.179	3.36	6.53	4.18541	F	381	CATTCTTTAACTTCTTTTCCATCTTATTCTCCTTAttcttcttcCTCTTTtatataAActtcttcttGTTGTTCTACTTCTTCATCTCTAtttttttAtttttGTACtttttCtttttCAtcttcttcttttttttcttcttcttGTACtttttcttcttcttcttTTATAttttttACTTATTCTTGTTCTACATCCTCTCCTTCATCTCCtttttCTCCTACTTTTCcttcttcttcttcttcttcttcttcttcttTCTAGTAGTAAAACAATTAGAGACGGTAAGTAGCTGTCGTTAATAGTATCGGTAATAATCttttttAGAAGCTAATCTCCCCATGGGTACTAGTGCAGGTGCGCCAAGCATTGTAGGAACTA
MBo19	M00842:287:000000000-BGGT4:1:2109:24306:20716	1	145	30	10	1	AAG	AAGAAGAAGAAGAAGAAGAAGAAGAAGAAG	NA	1	1	3	8	202	TGCTATCACCCAATATCTAGGCTTTTCTCTATTTCAAATTTCCAACCCTTTTgagagaGGTTTATGtttttGATGTAGTGAGTCAAGGCACTTTCATAAAAGGCATTCATCACCCTAGTGGAAGGCTGATCaaaaaaGCAAaagaagaagaagaagaagaagaagaagaagATATTTTAGCAGTATGGTAGTTGTTGACTGT	TGCTATCACCCAATATCTAGGCT	ACAGTCAACAACTACCATACTGC	118	8	4	23	205	23	58.57	58.684	4.58	4.4	8.74531	F	209	ATTTGCTATCACCCAATATCTAGGCTTTTCTCTATTTCAAATTTCCAACCCTTTTgagagaGGTTTATGtttttGATGTAGTGAGTCAAGGCACTTTCATAAAAGGCATTCATCACCCTAGTGGAAGGCTGATCaaaaaaGCAAaagaagaagaagaagaagaagaagaagaagATATTTTAGCAGTATGGTAGTTGTTGACTGTCTGT
MBo20	M00842:287:000000000-BGGT4:1:1104:14740:4027	1	159	30	10	1	AAG	AGAAGAAGAAGAAGAAGAAGAAGAAGAAGA	NA	1	1	8	29	229	TGTGGTTAAAGCAATGGAAGCAGATAAAGCAATAGAAATAGAATATGAAGTagaagaagaagaagaagaagaagaagaagaTCATCCAACAGAATGAGAAGATAAAGCAGAAGGAGTAGAAGATGCAATAGGATAAGAAGGAGAAGATGAAGCGGATGTAGCAGAAGAAGTAGAAGAACATGAAAAGAAGAAAGCTAATAAAAGCTACGTATGAGAGTAGGAGTTCGGC	TGTGGTTAAAGCAATGGAAGCA	GCCGAACTCCTACTCTCATACG	29	126	108	22	336	22	59.038	60.032	3.91	3.06	4.9936	A	407	GTgaagaagaagaaggaggaggaggaGATGAACCAGTTGAAGTAAAGTAGATAAAATAACAAAAGCAAAAGATGAAGCAAAAGGATAAGAGTAGaaaaaGAAGATAATGTGGTTAAAGCAATGGAAGCAGATAAAGCAATAGAAATAGAATATGAAGTagaagaagaagaagaagaagaagaagaagaTCATCCAACAGAATGAGAAGATAAAGCAGAAGGAGTAGAAGATGCAATAGGATAAGAAGGAGAAGATGAAGCGGATGTAGCAGAAGAAGTAGAAGAACATGAAAAGAAGAAAGCTAATAAAAGCTACGTATGAGAGTAGGAGTTCGGCTCCTAACAATGAAAAGATCAAGAAAATACAGTAGGATTATTGTTAGTCAAATATACTCTGATT…
MBo21	M00842:287:000000000-BGGT4:1:1111:10801:3953	1	153	33	11	1	AAG	AAGAAGAAGAAGAAGAAGAAGAAGAAGAAGAAG	NA	1	1	2	9	171	aCAACAGAAGATCAGTATACGTTCttttttttttaagaagaagaagaagaagaagaagaagaagaagAAATCCCTTTTCTTTGAGTGGTTCATGACTAATTATAGTTAAATTCTAAAATTAATAATCTTTAAAGTTCCTTAAACAAAATACTGACAAGCATGATTCCTCAA	ACAACAGAAGATCAGTATACGTTCT	TTGAGGAATCATGCTTGTCAGT	9	82	119	25	289	22	57.841	57.975	3.01	3.41	11.1844	F	367	AGGCCAGTAAGGATATAATACTGGTATAACAGCCAGTATAATGTGAACCAGACTTAAACATGCTTAAATTTTGTTCAAAATAGCTAATAACTTGATCCACAATAttttttttGGaaaaaCAACAGAAGATCAGTATACGTTCttttttttttaagaagaagaagaagaagaagaagaagaagaagAAATCCCTTTTCTTTGAGTGGTTCATGACTAATTATAGTTAAATTCTAAAATTAATAATCTTTAAAGTTCCTTAAACAAAATACTGACAAGCATGATTCCTCAAATTCAAAACAAACaaaaaTTTCAACCATAACCAAGAGGTAACATTCCTACCATCATTAGGGTAGTCAGGATGTCTGAT
MBo22	M00842:287:000000000-BGGT4:1:1113:11889:3278	1	38	42	14	1	AAG	AAGAAGAAGAAGAAGAAGAAGAAGAAGAAGAAGAAGAAGAAG	NA	1	1	3	5	108	AGAAGAATTCGGTTAGGTCACaaaaaaGATGAAGACAaagaagaagaagaagaagaagaagaagaagaagaagaagaagAGAAAAGGCAATTCTTACCCATGTTATCT	AGAAGAATTCGGTTAGGTCACAA	AGATAACATGGGTAAGAATTGCCT	14	5	1	23	108	24	57.777	57.982	3.33	4.75	11.2419	F	219	AGAAGAATTCGGTTAGGTCACaaaaaaGATGAAGACAaagaagaagaagaagaagaagaagaagaagaagaagaagaagAGAAAAGGCAATTCTTACCCATGTTATCTAAGTAAAGAAATATGAGAAGATGTTATTTGCCGAAGCcctcctcctCTTAGCTTCATCTGACGGTAACAAAATCATGTGAAACATATCCATTACCATCTTCCAATTGTTGA
MBo23	M00842:287:000000000-BGGT4:1:1109:7522:8208	1	99	15	5	1	AAT	ATTATTATTATTATT	NA	1	1	2	3	100	TGAGTTCTTGTCTTGTCTTCGTAAAattattattattattGTATGAGATGAGGgagagatttttGAGCTTTCAATTTTGGCCTGAAGGGTGTCCCAAACC	TGAGTTCTTGTCTTGTCTTCGT	GGTTTGGGACACCCTTCAGG	3	40	74	22	173	20	57.613	60.54	3.85	3.86	4.92654	F	185	CTCCTAATGTaaaaaTATTTCATCCtttttAATGAAAAGAACtttttATATAGAATGTGTTTGTGGATGTCTTTGAGTTCTTGTCTTGTCTTCGTAAAattattattattattGTATGAGATGAGGgagagatttttGAGCTTTCAATTTTGGCCTGAAGGGTGTCCCAAACCGCCCAGTGGTCG
MBo24	M00842:287:000000000-BGGT4:1:2102:11703:8152	1	151	27	6	1.5	AAT	AATAATAATAATAATAATAACAACAAC	NA	1	1	5	0	90	aaaGTCATGTCTGGGTGATGAAaataataataataataataacaacaacATTTGTAATAATGATTGTAGAGTTGTAGCTGTGCTCATCAT	AAAGTCATGTCTGGGTGATGAA	ATGATGAGCACAGCTACAACTCT	0	18	129	22	218	23	57.628	59.803	2.57	3.24	7.56896	F	272	GAAATGATTCGCCACTGAGCAGttttttttttttttttGAAGGAAACTAGTAATCAATGTTAATATGAATTCTGAGGATAAAGtttttGGTTAATAatatatGTATTGTCTCATATTAGCTaaaaaaaaaaGTCATGTCTGGGTGATGAAaataataataataataataacaacaacATTTGTAATAATGATTGTAGAGTTGTAGCTGTGCTCATCATGATAGTCATGATGCTAGTCGTTGTAATGGTTTGAAATGCAGCAGTTTTAGTGTA
MBo25	M00842:287:000000000-BGGT4:1:2111:22573:24977	1	39	18	6	1	AAT	AATAATAATAATAATAAT	NA	1	1	3	7	96	TCTTCAGGTGACAAGCAACATATTTAAaataataataataataatTTCCTACAATATAAGTAGATGTTGATACAATATGCTATCTCCATGCCCAGG	TCTTCAGGTGACAAGCAACA	CCTGGGCATGGAGATAGCAT	7	31	12	20	107	20	57.292	59.303	3.33	3.79	3.4053	A	355	CTATCAAAAGATCTTCAGGTGACAAGCAACATATTTAAaataataataataataatTTCCTACAATATAAGTAGATGTTGATACAATATGCTATCTCCATGCCCAGGGGTACCTATGTTCTAATTTATTGATCTACTTTTCTACTATTCTCAGACAAGCCATCAAGTCAAGCCTACCaaaaaTTATAGATTTGATTGACCTAAACTCAATTGATGGCAACTAAATGGCTAATAAAATATTTTGGGACCATGGTAGGTTGCACGAGTATGTAGCCAAATGTCAAATGATCCTAATCAAGATAGAATCCAATTATCATTCTTTGGTAAATATAAACCAGATAATTGATAACTTAAGT
MBo26	M00842:287:000000000-BGGT4:1:2105:25636:22206	1	89	21	7	1	AAT	AATAATAATAATAATAATAAT	NA	1	1	7	6	134	CCATAGGCCAGCCCACTATaaaaaTAAAATAAATAAAATATtatataaataataatACTATtaataataataaTAGATAAATAAaataataataataataataatAAATAGACAAATGAGgaagaagaaAGGGT	CCATAGGCCAGCCCACTATA	ACCCTTTCTTCTTCCTCATTTGT	64	6	5	20	138	23	58.343	57.933	1.31	2.83	6.7235	F	179	CAGGCCATAGGCCAGCCCACTATaaaaaTAAAATAAATAAAATATtatataaataataatACTATtaataataataaTAGATAAATAAaataataataataataataatAAATAGACAAATGAGgaagaagaaAGGGTAAAAGaaaaaGGAAGAAGAGGAAGGAagagagGAAGGAAAG
MBo27	M00842:287:000000000-BGGT4:1:2111:19079:20834	1	250	21	7	1	AAT	ATTATTATTATTATTATTATT	NA	1	1	3	9	103	TCTCTATTGCTTGGTGATcccccATaaaaaattattattattattattattAGAAGTGAGGATTCCATAACGCAATATCTCATGATAACCATCCCTTGTTGGA	TCTCTATTGCTTGGTGATCCC	TCCAACAAGGGATGGTTATCATG	9	29	220	21	322	23	57.154	58.464	3.85	3.07	8.38156	F	408	ATTCTACTTCCTCCATAAGTTGaaaaaaTGCTACTAAGGAAAGCTCCAACTCGAAGtttttAGACAAAAGCTCTATTTGAGATGCATCAGAAAGCTATATTCTGAGACCATACCTATGAGACATTCTTTAAAACTAATTCAATGCCATAATAATTTAAAtttttAtttttATTGCTATAATTTTGCAATTAAGGATCTTGAGCTTCAATCTTATGACATTCTCTATTGCTTGGTGATcccccATaaaaaattattattattattattattAGAAGTGAGGATTCCATAACGCAATATCTCATGATAACCATCCCTTGTTGGAAGGCCATCATAATGATTGTAAAGATCAATATGCTCTCAAAGTTGTATTAATGAGAAACCATATAATAtttttCCATT…
MBo28	M00842:287:000000000-BGGT4:1:2102:6432:10402	1	105	24	8	1	AAT	ATTATTATTATTATTATTATTATT	NA	1	1	2	64	205	GCCTTGAGAGTGGAAGAGGCTCTCAGACTCAAACTTTCAGGCCCTCAGCCTTCAAGTTGAGATTATTAGGCTGAGACTTCTTAGattattattattattattattattTTCAAAACATCCTCCAGAGGGGAGACACTGAGACAAGTGCGTAAGGGAGTTCACATGGTGGACAGTGGGGATGTCCCATGAGGGCGCAAAGAAGAGA	GCCTTGAGAGTGGAAGAGGC	TCTCTTCTTTGCGCCCTCAT	64	77	21	20	225	20	60.392	59.385	4.7	2.9	1.00766	A	286	AATAATCAGCTATAAAAGGAGCCTTGAGAGTGGAAGAGGCTCTCAGACTCAAACTTTCAGGCCCTCAGCCTTCAAGTTGAGATTATTAGGCTGAGACTTCTTAGattattattattattattattattTTCAAAACATCCTCCAGAGGGGAGACACTGAGACAAGTGCGTAAGGGAGTTCACATGGTGGACAGTGGGGATGTCCCATGAGGGCGCAAAGAAGAGATTAAGGCATGTAAATCtttttttGCATCTTATTggggggACTTTAATCCTACATCGGTTGA
MBo29	M00842:287:000000000-BGGT4:1:2105:8298:14703	1	55	48	8	1.5	AAT	AATAATAATAATAATAATAATAATAACAATAATAATAATAATAATAAT	NA	1	1	3	27	211	AGACATGTAGAGGTGGGACTTCTCTAAAGAGATGACATGTTGACTTAaataataataataataataataatAACaataataataataataataatATGAGTTTAAATTTTGGGAGTTAGACTAAAGGAAGTTTGACATGTTAAAATTTAACACGGTTCTATCTCCCTTATCTGTTGTGAACAGaaaaaCTGTAACACGtctctcATACAGa	AGACATGTAGAGGTGGGACT	TCTGTATGAGAGACGTGTTACAGT	27	92	8	20	218	24	57.07	58.998	3.85	3.55	7.93198	F	347	GTGATGAAGACATGTAGAGGTGGGACTTCTCTAAAGAGATGACATGTTGACTTAaataataataataataataataatAACaataataataataataataatATGAGTTTAAATTTTGGGAGTTAGACTAAAGGAAGTTTGACATGTTAAAATTTAACACGGTTCTATCTCCCTTATCTGTTGTGAACAGaaaaaCTGTAACACGtctctcATACAGaaaaaTATTTAAAGGGTAGCCCCTAGGGTGAAAGAGAacacacAAGAAAAttttttCCTTCCTTCCCTTCTCTACAGAAGAcccccccTCTGTGCAAAATAAATTTCTGATTCTCATCCCTCTTTTCTAT
MBo30	M00842:287:000000000-BGGT4:1:2114:27838:16115	1	63	24	8	1	AAT	AATAATAATAATAATAATAATAAT	NA	1	1	3	32	146	TGACCATAACAAGCTACCAGGTATTCAAAGCTCTACATTCTAGTTAGGATACTAaataataataataataataataatATGGTTTTACCTATATGTAAACTACAAATTAAATACTTTACTGACATGCAATATCAATAGCTTCCACC	TGACCATAACAAGCTACCAGGT	GGTGGAAGCTATTGATATTGCATGT	32	43	9	22	154	25	59.09	59.758	4	3.21	8.15271	A	451	ACATTTAATGACCATAACAAGCTACCAGGTATTCAAAGCTCTACATTCTAGTTAGGATACTAaataataataataataataataatATGGTTTTACCTATATGTAAACTACAAATTAAATACTTTACTGACATGCAATATCAATAGCTTCCACCTTATaaaaaTTGAAAatatatGATTTCTTACTGCAGCCCtttttACAATATAGATTAGCTAAAATTTCAAATATGCCCTCTAGAACTTTGAACaaaaaGCAAAATTTAGAGGGGATGTAGCTGCAAACCATCCCATTGACTCACaaaaaGAAATATACTGGAGACACCATGAAAATGTTGTAGAGGAAAAGTAAGCAGTTGAGGCAAAACAATAAATCCCTAAAGGTATCAGGTGTTAGTGAAAA…
MBo31	M00842:287:000000000-BGGT4:1:2104:8423:16931	1	263	30	10	1	AAT	TATTATTATTATTATTATTATTATTATTAT	NA	1	1	3	51	187	TGACAATGATGCATGCGATAACAATATAATATCATTTCACACtatataATATTACAATATCGTATTAGCACAGTATTATATGCTAtattattattattattattattattattatAATGGCATGATATTACATAACATTATATCATATTACTCAATGAAGAagagagCTAAAGGACATGGGTGATGC	TGACAATGATGCATGCGATAACA	GCATCACCCATGTCCTTTAGC	62	51	178	23	364	21	59.373	59.322	2.41	3.09	5.30477	F	364	GTGAACAAGTTATGCCCTTGCTAACAACACTATGGCTAGTTCATGATGAAGGGATAAAATTAAATTTTAAATACTGtgctgctgcAGCTGCTGATGATATTTTATAGCATATGATATTACTAATCGTAGTTTTAGTTAGATAATAGACATACTGTAATATTACAACAAAACAATTTATGACAATGATGCATGCGATAACAATATAATATCATTTCACACtatataATATTACAATATCGTATTAGCACAGTATTATATGCTAtattattattattattattattattattatAATGGCATGATATTACATAACATTATATCATATTACTCAATGAAGAagagagCTAAAGGACATGGGTGATGC
MBo32	M00842:287:000000000-BGGT4:1:2110:15793:28429	1	144	30	10	1	AAT	ATTATTATTATTATTATTATTATTATTATT	NA	1	1	4	11	117	TCCGAGGGCAGTATTTGTCGATGTTGTATCAattattattattattattattattattattTATTTATTTTgggggggggTggggggTGGGGAGGGGCTTAGGTTTCCGAAATAGTG	TCCGAGGGCAGTATTTGTCG	CACTATTTCGGAAACCTAAGCCC	11	33	113	20	229	23	59.825	59.374	4.35	5.19	3.80106	F	443	TTTGTGTCCGAGGgagagaTGGTCCCTCGGTCTGTGTCCGAGGGAGGTAGAAAGGAGCCGCTCGTCTGGCAgggggCAGGTCGGCGCCCGAGGGCCTTCTGCCTGTGTTGCGTCCGAGGGCAGTATTTGTCGATGTTGTATCAattattattattattattattattattattTATTTATTTTgggggggggTggggggTGGGGAGGGGCTTAGGTTTCCGAAATAGTGTAATGTaaaaaGAAGTGCTTCGAATCATTGCTATTTGACTCGGACCTGTTCTGaaaaaGTCGAGGTATTTCGAATTGTTTGTTGACACGGACAAAGTAAGGGAAAACCTCTGAAATGATTTCAATATTGGACCTTGGACATATAATAGTTACGAATCGAATCTCTTTAGA…
MBo33	M00842:287:000000000-BGGT4:1:1108:7076:5827	1	82	51	17	1	AAT	TATTATTATTATTATTATTATTATTATTATTATTATTATTATTATTATTAT	NA	1	1	5	24	147	GCACACTTTGTATCCGACGCACGGCTTGGTGAAACTCCGGCAACAATATTAtattattattattattattattattattattattattattattattattatTAGGTAAACATCAATTATATCTATCCCTGACGGTTACTATCCCTG	GCACACTTTGTATCCGACGC	CAGGGATAGTAACCGTCAGGG	31	24	31	20	177	21	59.905	59.313	5.19	4.45	1.78185	A	196	CACTTCAGCAACCATACCACCAGCATTCCAGCACACTTTGTATCCGACGCACGGCTTGGTGAAACTCCGGCAACAATATTAtattattattattattattattattattattattattattattattattatTAGGTAAACATCAATTATATCTATCCCTGACGGTTACTATCCCTGATGGTTTTATACTTCAAAA
MBo34	M00842:287:000000000-BGGT4:1:2106:19917:4636	1	102	56	28	1	AG	CTCTCTCTCTCTCTCTCTCTCTCTCTCTCTCTCTCTCTCTCTCTCTCTCTCTCTCT	NA	1	1	2	41	192	GTGGCACCTCTGCGGTTTGCCTGGGAAAATAAATGAAGTGTTTGGGAAAAGCTAAGACATTGCAATCTTGTATGCctctctctctctctctctctctctctctctctctctctctctctctctctctctctCATTTTGCTTACTATTATTTGAATGTAGGTAATGAGTTACACTCCAGGTGCTTCCATCTCg	GTGGCACCTCTGCGGTTT	CGAGATGGAAGCACCTGGAG	57	41	27	18	218	20	60.595	60.179	3.27	3.86	2.77368	F	314	CTGATGTGATTGATCTCTAACTTAAGGTGGCACCTCTGCGGTTTGCCTGGGAAAATAAATGAAGTGTTTGGGAAAAGCTAAGACATTGCAATCTTGTATGCctctctctctctctctctctctctctctctctctctctctctctctctctctctctCATTTTGCTTACTATTATTTGAATGTAGGTAATGAGTTACACTCCAGGTGCTTCCATCTCgggggTGGTAGAACCCTATGGAACATGTCCCCTTGTGGGGATTCTAGCAAGCAATGAATGAGCTTGGTtggtggtggGAACTGAGACCGAAAGCTGG
MBo35	M00842:287:000000000-BGGT4:1:2113:2902:18260	1	114	48	24	1	AG	AGAGAGAGAGAGAGAGAGAGAGAGAGAGAGAGAGAGAGAGAGAGAGAG	NA	1	1	2	16	137	AGCATGCTTTCTGCTTCATGTGTTAAAGCTGCTACATATACTTGCATAGCCCCagagagagagagagagagagagagagagagagagagagagagagagagGATAAAGGTGTTATAAGCAATGCAGTCAGGGAAAGG	AGCATGCTTTCTGCTTCATGTG	CCTTTCCCTGACTGCATTGC	31	16	61	22	197	20	60.095	59.471	3.21	3.56	2.62408	A	224	CCTCACATTATTTGTTCAATCCATTTGGCACAGTGTTTTCCTTTAGCCTTTTCTTTCAGTAGCATGCTTTCTGCTTCATGTGTTAAAGCTGCTACATATACTTGCATAGCCCCagagagagagagagagagagagagagagagagagagagagagagagagGATAAAGGTGTTATAAGCAATGCAGTCAGGGAAAGGCGAGGACACTGTAATGAGTAGGGAAAA
MBo36	M00842:287:000000000-BGGT4:1:1106:13671:15362	1	116	46	23	1	AG	CTCTCTCTCTCTCTCTCTCTCTCTCTCTCTCTCTCTCTCTCTCTCT	NA	1	1	2	6	180	TCGGAAGTCGAATGTGGCAGGGGTTGGGGAGGGGAGATAAAACACTGAGGGAGAGGGTTAAACCCTCTTCTTTCTTAGTTTCCTATTTCACCTTCCCTCACATCTActctctctctctctctctctctctctctctctctctctctctctctCGTGTGCCATGATTGACCACTCTTCCGA	TCGGAAGTCGAATGTGGCAG	TCGGAAGAGTGGTCAATCATGG	86	6	10	20	189	22	60.39	60.093	4.85	3.66	2.48332	A	198	CGCGGTAGATCGGAAGTCGAATGTGGCAGGGGTTGGGGAGGGGAGATAAAACACTGAGGGAGAGGGTTAAACCCTCTTCTTTCTTAGTTTCCTATTTCACCTTCCCTCACATCTActctctctctctctctctctctctctctctctctctctctctctctCGTGTGCCATGATTGACCACTCTTCCGATCTACCGCG
MBo37	M00842:287:000000000-BGGT4:1:2114:16041:14961	1	84	56	23	1.5	AG	CTCTCTCTCTCTCTCTCTCTCTCTCTCTCTCTCTCTCTCTCTCTCTCAGTGTGTGT	NA	1	1	3	14	142	GCTCTACTCCCAGAGACGGATCAAAGTGTATGGCctctctctctctctctctctctctctctctctctctctctctctctCAgtgtgtgtGGATTCACCATGAGTTCTATGGCAGAAGAAGCTGAGCATTCCGTCGACTGTT	GCTCTACTCCCAGAGACGGA	AACAGTCGACGGAATGCTCA	14	32	50	20	191	20	60.107	59.683	4.69	4.26	0.424276	B	194	CGAACGCGACCGGAGGAAGAAACTGAACAGCTTGTACTCCTCCCTCCGCGCTCTACTCCCAGAGACGGATCAAAGTGTATGGCctctctctctctctctctctctctctctctctctctctctctctctCAgtgtgtgtGGATTCACCATGAGTTCTATGGCAGAAGAAGCTGAGCATTCCGTCGACTGTTTCC
MBo38	M00842:287:000000000-BGGT4:1:2113:9826:20951	1	337	64	20	1.5	AG	TGTGTGTGTGTGTGTGTGTGTGTGAGAGAGAGAGAGAGAGAGAGAGAGAGAGAGAGAGAGAGAG	NA	1	1	2	1	130	AGTCCTCACTGCTGGTGGTAGGGGCAGGGAGCCATTTGCGAGAtgtgtgtgtgtgtgtgtgtgtgtgagagagagagagagagagagagagagagagagagagagagATGCAAGATGGACTATTCAAGGA	AGTCCTCACTGCTGGTGGTA	TCCTTGAATAGTCCATCTTGCA	23	1	294	20	423	22	60.179	57.157	3.25	4.08	5.02146	B	459	CAACAGGaaaaaaaaaaaaaaaTACAACGACAGACATGCTTTGACTAACCTTTGTCATGAGATCTTAATCTAATGACCAAAATGGCCAGAGATTTATACACAATCCCTACATTTATTGATaaaaaaaTTATAAATTTTATTTCTGAGTAAAACTAAAATGTAATAGATATGATGTATTACCCATGAAGAAATAACTATAATTTCCTTCATTGATTTTCCTGtctctcCCCCTTGAGTTCCTCTGTTTCaaaaaTGGCTAGTTTCATCGTTCGCATGGGAATCAAGAATAGAAGAGTCCTCACTGCTGGTGGTAGGGGCAGGGAGCCATTTGCGAGAtgtgtgtgtgtgtgtgtgtgtgtgagagagagagagagagagagagagagagagagagagaga…
MBo39	M00842:287:000000000-BGGT4:1:1108:24136:13827	1	167	38	19	1	AG	TCTCTCTCTCTCTCTCTCTCTCTCTCTCTCTCTCTCTC	NA	1	1	6	34	168	AACGCAGGTTAAGAGGCTCCTAACTTGAACTTGACTCCGCGTATCAGCAAGCCAtctctctctctctctctctctctctctctctctctctcTGGGTCGGCACGGGAGGTGACCGCAACCATTTGATGGTGACATGATCTGAATGTGCGTAAGGGTTGCACCAGGAGG	AACGCAGGTTAAGAGGCTCC	CCTCCTGGTGCAACCCTTAC	34	56	113	20	280	20	60.036	60.323	4.7	2.34	0.35884	A	442	atctatctatctatctatctatctatctatctatctatctatatatatatatatatatatatatGGGTCGGCGTAGGTGGTCACTGCAACCATCCAATGGTAACATGACCTGAACGCAGGTTAAGAGGCTCCTAACTTGAACTTGACTCCGCGTATCAGCAAGCCAtctctctctctctctctctctctctctctctctctctcTGGGTCGGCACGGGAGGTGACCGCAACCATTTGATGGTGACATGATCTGAATGTGCGTAAGGGTTGCACCAGGAGGGTCTAGTGAATAGATTGGGTCAGAAATAGGAATTATCAATtatatatataCATTcacacaGGTATCTAtgtgtgtgtgtgtatatataAAATAAAAGGTGGTTGCAAAGATCTGAAACA…
MBo40	M00842:287:000000000-BGGT4:1:2105:18310:26067	1	199	38	19	1	AG	CTCTCTCTCTCTCTCTCTCTCTCTCTCTCTCTCTCTCT	NA	1	1	3	15	193	tgtGGAGTGTGAGTCGATGGTAAGAGAACACTGGActctctctctctctctctctctctctctctctctctctCCGTGTGCGAAGGCAAGTGCACGGGACAAGACTTGGTTGCATCGCTCCCAAAATACAAAATCATGGCTGTATGGCCACCATTATATTCACTATTTACTAGCGTGATGAGATTATGCAGCC	TGTGGAGTGTGAGTCGATGG	GGCTGCATAATCTCATCACGC	15	99	164	20	356	21	59.397	59.804	3.51	5.34	1.79942	F	357	ATTACCGAACCACCACAGCTGGGCGATATGGTGCGTGTGCGTgcgcgcGTGGAAGGTAAGAGAACGCTGGATGAGTCTTGGCAATTTAGTTGCGTGCGGGCCTTGGCAATATGGTTTTGTgcgcgcAcgcgcgcgcgTGTGGAAGGTAagagagCAGCGCgtgtgtGGAGTGTGAGTCGATGGTAAGAGAACACTGGActctctctctctctctctctctctctctctctctctctCCGTGTGCGAAGGCAAGTGCACGGGACAAGACTTGGTTGCATCGCTCCCAAAATACAAAATCATGGCTGTATGGCCACCATTATATTCACTATTTACTAGCGTGATGAGATTATGCAGCCA
MBo41	M00842:287:000000000-BGGT4:1:2111:20793:17223	1	181	36	18	1	AG	AGAGAGAGAGAGAGAGAGAGAGAGAGAGAGAGAGAG	NA	1	1	4	41	184	TTCTCCACCAGCCTCACAACGCCAtttttGAACACCCAGACTCCAGACAtctctcTTGAGAGCAGtttttCAACTATTGGACTGCCCagagagagagagagagagagagagagagagagagagTAGGTGATGGGTTGGAATGAAGTAGCTGGTGGATTGGAGCTGAAGGGTTGATGGGCCGTAT	TTCTCCACCAGCCTCACAAC	ATACGGCCCATCAACCCTTC	67	41	94	20	277	20	59.891	59.817	3.32	3.46	0.29136	F	306	CGTTCAagagagGCGTAGGAGTTGATGACTTCATTTGTGGGAGTGTGAAGTAATACCTTCCGACGAACCGTGGAGGATTGCTCATTTGCAGGGTTCTCCACCAGCCTCACAACGCCAtttttGAACACCCAGACTCCAGACAtctctcTTGAGAGCAGtttttCAACTATTGGACTGCCCagagagagagagagagagagagagagagagagagagTAGGTGATGGGTTGGAATGAAGTAGCTGGTGGATTGGAGCTGAAGGGTTGATGGGCCGTATAAATAGACGAAGTCAGAATTTTGAAATAA
MBo42	M00842:287:000000000-BGGT4:1:2112:15803:19272	1	107	66	18	1.5	AG	CTCTCTCTCTCTCTCTCTCTCTCTCTCTCTCTCTCTCACACACACACACACACACACACACACACA	NA	1	1	3	11	136	CCTGGTGGTACATGTGGTCATGATGTCAGAGctctctctctctctctctctctctctctctctctctcacacacacacacacacacacacacacacaATAAATCAATCTTCTACCTTCAGAAATGAATGTGCcaca	CCTGGTGGTACATGTGGTCA	TGTGGCACATTCATTTCTGAAGG	11	16	76	20	211	23	59.31	59.744	4.02	3.46	3.94658	F	449	TGCTTTGTTCCAGTCAGTAAATTCGAGACATGCTGGAGAATCTATCGTTGAtctctccacacaATCCCCTGGAATCCTGGTGGTACATGTGGTCATGATGTCAGAGctctctctctctctctctctctctctctctctctctcacacacacacacacacacacacacacacaATAAATCAATCTTCTACCTTCAGAAATGAATGTGCcacacaATAATTGTTTGAAGAACATTTACGTGGTTGAATTGAGGACATCAAGCATGAAAGCAACTCACTTGAAAAGGCCTTCTACAAGCCTACCAACtatataAAACATCAGATGGAAGCTCCCAACCctctctCACAGCATGCCATTTGCTATCCCATTCTTTCTCATGGACACTCATCTTAACCTTATCT…
MBo43	M00842:287:000000000-BGGT4:1:2112:6551:19081	1	39	82	18	1.5	AG	ACACACACACACCACACACACACACACACACACACACACACACACAGAGAGAGAGAGAGAGAGAGAGAGAGAGAGAGAGAGA	NA	1	1	6	4	137	AGTTTGTTCtgtgtgTTGTCACATAAacacacacacaccacacacacacacacacacacacacacacacacagagagagagagagagagagagagagagagagagagaTGCTAAGGTCTTCAAAGCAAGAtgtgtgC	AGTTTGTTCTGTGTGTTGTCAC	GCACACATCTTGCTTTGAAGAC	4	7	13	22	149	22	57.58	58.697	3.67	3.01	7.72293	F	292	GGACTGACTCTTAGTTTGTTCtgtgtgTTGTCACATAAacacacacacaccacacacacacacacacacacacacacacacacagagagagagagagagagagagagagagagagagagaTGCTAAGGTCTTCAAAGCAAGAtgtgtgCAACACTATTGACTTGTCATCAGCAATATGAAAAGTAAAATTATGAAATAATAAAATGCTTAAGCCATAACTGTCACTCTGCctctctTTCAGGAAGTGAACAAATATTTCTGAAAACAAATGAGATATCAGCTCTTCCGATCT
MBo44	M00842:287:000000000-BGGT4:1:1105:12242:3541	1	83	34	17	1	AG	GAGAGAGAGAGAGAGAGAGAGAGAGAGAGAGAGA	NA	1	1	12	56	193	AacacacTTTAAATCGACTTCTTCATTGGCGGCGAGCTCTAATTTCCGGCACATACGGGTTTAGATAAGGAAGATGTGGGTgagagagagagagagagagagagagagagagagaGGTCATGGTGACCTCTAATGAGGTGGTCACGATGGCCATCACCTCACATGGCGGCCATCGCCTCACATGGCAGCCGTG	AACACACTTTAAATCGACTTCTTCA	CACGGCTGCCATGTGAGG	56	60	2	25	194	18	57.452	61.13	3.02	3.86	10.6777	F	208	AAacacacTTTAAATCGACTTCTTCATTGGCGGCGAGCTCTAATTTCCGGCACATACGGGTTTAGATAAGGAAGATGTGGGTgagagagagagagagagagagagagagagagagaGGTCATGGTGACCTCTAATGAGGTGGTCACGATGGCCATCACCTCACATGGCGGCCATCGCCTCACATGGCAGCCGTGGCGGCCACCGCCTT
MBo45	M00842:287:000000000-BGGT4:1:1109:17973:28412	1	137	34	17	1	AG	GAGAGAGAGAGAGAGAGAGAGAGAGAGAGAGAGA	NA	1	1	3	2	193	TAGATCGGAAGTCAGGCCCCTACACAGGCCATTCGGCCTGTTGCAACCTTAACCCCTTCCCCTTAAGTTTGGAAGGGTTTGCGGCCACTCGTAGCTCCCAACCAAAAGGGAAAGAGACACCCCATGGCCTCAGTTCgagagagagagagagagagagagagagagagagaAGGACCTCTCCTCCCACTTCTCT	TAGATCGGAAGTCAGGCCC	AGAGAAGTGGGAGGAGAGGTC	117	2	1	19	193	21	58.178	59.993	5.8	3.85	3.82885	A	253	TAGATCGGAAGTCAGGCCCCTACACAGGCCATTCGGCCTGTTGCAACCTTAACCCCTTCCCCTTAAGTTTGGAAGGGTTTGCGGCCACTCGTAGCTCCCAACCAAAAGGGAAAGAGACACCCCATGGCCTCAGTTCgagagagagagagagagagagagagagagagagaAGGACCTCTCCTCCCACTTCTCTTCCTCTCCgagagagaAGGCCTCAGTCCGTTACTTCGGCTCAGAGCCGATCCTTTCTTTT
MBo46	M00842:287:000000000-BGGT4:1:2112:12579:11187	1	136	34	17	1	AG	CTCTCTCTCTCTCTCTCTCTCTCTCTCTCTCTCT	NA	1	1	7	14	154	GCCGATATTAGcttcttcttGGCTCATCAAAGACATTTTAAATCTCCCATTGACCCAGTCTTAGTCCATCAAGGAACTCCCTTTCctctctctctctctctctctctctctctctctctCGTGTCTTTAATCTGTGAAACGGGATCAACAAGGC	GCCGATATTAGCTTCTTCTTGGC	GCCTTGTTGATCCCGTTTCAC	62	14	51	23	204	21	59.813	60.069	4.52	3.18	4.25597	F	241	GTCCATTAAACCATGCTTAgggggAAGACAGTTTAAAGACATTTTAGAAGGCCGATATTAGcttcttcttGGCTCATCAAAGACATTTTAAATCTCCCATTGACCCAGTCTTAGTCCATCAAGGAACTCCCTTTCctctctctctctctctctctctctctctctctctCGTGTCTTTAATCTGTGAAACGGGATCAACAAGGCAGCAAAGAATCATAGGAAAAGGGGAGAAAGAAGGAAG
MBo47	M00842:287:000000000-BGGT4:1:1102:2903:17378	1	271	32	16	1	AG	GAGAGAGAGAGAGAGAGAGAGAGAGAGAGAGA	NA	1	1	3	9	188	GGCACCTGACGCCTCTTTTCTTTCTTTGtttttttttAAAAGaaaaaTAAAATAATTAATAATTGAATCGGAATCtttttATAAGCACTGGCTATCATGGATACAGCTGCAGTAGGTCGGATGgagagagagagagagagagagagagagagagaGTTGAAATAATGGATACAATTGAGTCGAAGTGA	GGCACCTGACGCCTCTTT	TCACTTCGACTCAATTGTATCCAT	105	9	148	18	335	24	59.967	58.022	2.52	3.41	8.01032	F	359	AGATCGGAGAGCGTTCAACCGGTCACTAAAGCGGCCTCGCAGGTAGCTGCAAGAGAAGTTTTGGTTATGAGTGAGTGTACTGATCAACCAGTGTTTGGCGGTTAGCTCAACTAGGCCCATGAATGTATGTGCATGCATCCATCGATCGGCACCTGACGCCTCTTTTCTTTCTTTGtttttttttAAAAGaaaaaTAAAATAATTAATAATTGAATCGGAATCtttttATAAGCACTGGCTATCATGGATACAGCTGCAGTAGGTCGGATGgagagagagagagagagagagagagagagagaGTTGAAATAATGGATACAATTGAGTCGAAGTGATTTTCTTGAttttttGTGGACAGA
MBo48	M00842:287:000000000-BGGT4:1:1110:12945:15351	1	153	32	16	1	AG	CTCTCTCTCTCTCTCTCTCTCTCTCTCTCTCT	NA	1	1	3	2	92	AGGACAAAGAGATGAGAAGCCTAGctctctctctctctctctctctctctctctctGATTAATGGAATCTGGTCAACTAACTGGGAATTGGT	AGGACAAAGAGATGAGAAGCCT	ACCAATTCCCAGTTAGTTGACCA	2	13	129	22	220	23	58.819	59.861	4.58	4.02	6.3199	A	239	AGAAGGAAATCAAGTTCTTGCCATTGGAAGTAAGAAgggggAGTGTAAGAAGAGATcacacaGACATTATAGGGGAATCTCAGTGTCATCAAGTTGACCTTATGAAACATACATGGACTAAGGTAAAGAGGACAAAGAGATGAGAAGCCTAGctctctctctctctctctctctctctctctctGATTAATGGAATCTGGTCAACTAACTGGGAATTGGTTATGAGGATTTGCACTTTT
MBo49	M00842:287:000000000-BGGT4:1:2103:23601:11799	1	126	32	16	1	AG	AGAGAGAGAGAGAGAGAGAGAGAGAGAGAGAG	NA	1	1	5	19	141	CATCACCCATtctctcTGCCTCACCCTATTTATAACTCAcccccAAGCTAtttttCATCTGCAATTCTCCagagagagagagagagagagagagagagagagAAAGCGTCCAAGCTATGGGTGAGGTGCGGATGGTTTCTC	CATCACCCATTCTCTCTGCCT	GAGAAACCATCCGCACCTCA	49	19	56	21	196	20	59.51	60.036	4.75	3.86	1.52604	F	293	GTCCGCAATGAAAACAAGGAATAATGTCTTGACGTTACGAATTCAAAATAGTATTCATCACCCATtctctcTGCCTCACCCTATTTATAACTCAcccccAAGCTAtttttCATCTGCAATTCTCCagagagagagagagagagagagagagagagagAAAGCGTCCAAGCTATGGGTGAGGTGCGGATGGTTTCTCTTAGTTAGCTCTGATATCTTTCTGGATTGATTATGGATGGCTTTCTTTATTGACCtttttCTCTTGTTTTGGTTTCAGAAGGAAGAGAAGGGAGAGG
MBo50	M00842:287:000000000-BGGT4:1:1102:11141:11829	1	347	30	15	1	AG	AGAGAGAGAGAGAGAGAGAGAGAGAGAGAG	NA	1	1	3	2	150	AGAAGTCATCTTGAGGGCCCCTCATACATTTGCATGGAGGAGTCTATTTTCAGTATGTTATTCTGCATTTTGAAGCAACATCATTTACCCCAAagagagagagagagagagagagagagagagAAAGCAATTTGTGTATCATTCTAGCAA	AGAAGTCATCTTGAGGGCCC	TTGCTAGAATGATACACAAATTGCT	73	2	254	20	403	25	59.085	57.605	5.8	3.91	8.31055	A	449	GTTAAGGGGaaaaaGGAATAGGGGAAAATGTGAAGTAGAGGCGGAGTTGGGTGTCCCCtttttttATTTTAtttttAtttttCATTTTcccccTTTTcccccttttttCTCCATTACTATGCTTCCCAtttttCTATGGAAAGTATTCTGCATTATATTCAATaaaaaaGTAGTTGACAGTAATATAGGTCATTGGAGAATGGCATGAGAAATCTTTACCtatataTTAAATTGTATTCCACCTTGTGTTTGTAGAAGTCATCTTGAGGGCCCCTCATACATTTGCATGGAGGAGTCTATTTTCAGTATGTTATTCTGCATTTTGAAGCAACATCATTTACCCCAAagagagagagagagagagagagagagagagAAAGCAATTTGTGTATCATTCTA…
MBo51	M00842:287:000000000-BGGT4:1:1103:12195:24364	1	55	30	15	1	AG	TCTCTCTCTCTCTCTCTCTCTCTCTCTCTC	NA	1	1	3	20	191	TGTGCTATTTGTTGGGAATGCATAAACTTGCTCAACCCTTGGtctctctctctctctctctctctctctctcTAAGAGGGAGAAagagagGaaaaaGGGAAagagagGGAGACCCACCCAAATCATAATTACCTAATTTCAAATCCTTGGAGATTAGTAGCCAAAGACTTGAAACTAGAACATGAGCTTGC	TGTGCTATTTGTTGGGAATGCA	GCAAGCTCATGTTCTAGTTTCAAGT	20	94	13	22	203	25	59.104	60.049	3.96	3.16	7.94517	F	213	ATTGTTTTCTTATGTGCTATTTGTTGGGAATGCATAAACTTGCTCAACCCTTGGtctctctctctctctctctctctctctctcTAAGAGGGAGAAagagagGaaaaaGGGAAagagagGGAGACCCACCCAAATCATAATTACCTAATTTCAAATCCTTGGAGATTAGTAGCCAAAGACTTGAAACTAGAACATGAGCTTGCTAAGCAAAGG
MBo52	M00842:287:000000000-BGGT4:1:1111:15388:17331	1	223	30	15	1	AG	TCTCTCTCTCTCTCTCTCTCTCTCTCTCTC	NA	1	1	3	1	122	ACACATCCTACATGAATAGACCTCCAtctctctctctctctctctctctctctctcAGATGAATAACCATGTCTAGAGACTGTATCCGCATAAAATCAAAGGGAATCTAGGCTATGACAAGA	ACACATCCTACATGAATAGACCTCC	TCTTGTCATAGCCTAGATTCCCT	1	43	197	25	318	23	59.694	58.179	4.3	4.2	10.1264	A	430	AAttctttctttctGGACAAGAAGAATGCTTCAATAATAAAATTCAGATTTGTCCCCAGAAATtatataGATTTGATTACTCATTATCTCCCATATGACTGCTAATCAGAAATTAGTGAAACAGAACTGGTTTCCATCCTGCATCACAAAATATAAAGAAATAAagagagATCTTTTACCCTCCCTTCCAAAAGGTACACATCCTACATGAATAGACCTCCAtctctctctctctctctctctctctctctcAGATGAATAACCATGTCTAGAGACTGTATCCGCATAAAATCAAAGGGAATCTAGGCTATGACAAGAGAAATAATCATATAACATATAATTGAAAGGCTCTTTTCCATGAGTAATACCCCAtttttCTTCCTGAAGGAAAATGAATTA…
MBo53	M00842:287:000000000-BGGT4:1:2108:3450:10175	1	42	30	15	1	AG	TCTCTCTCTCTCTCTCTCTCTCTCTCTCTC	NA	1	1	3	0	131	AGGTTTAAGGGTTTGGGTTAGGGtctctctctctctctctctctctctctctcATCTCTACTTCTTGCATCCACAAGCAATTTGAAAATGTAGTGTTATTTGTCAAGATTGACCCTCAAACTTACTCCACC	AGGTTTAAGGGTTTGGGTTAGGG	GGTGGAGTAAGTTTGAGGGTCA	0	56	19	23	149	22	60.181	59.629	3.53	4.02	5.55226	A	284	ctctctCCctctctctctAGGTTTAAGGGTTTGGGTTAGGGtctctctctctctctctctctctctctctcATCTCTACTTCTTGCATCCACAAGCAATTTGAAAATGTAGTGTTATTTGTCAAGATTGACCCTCAAACTTACTCCACCAATACTTTTATCATCTTGCAAATTCCTCACCATAATAGAGGATATGTATATTTTAGCTATGAACAACGTCCTTTTCCTCATTATCCCTTCTAAAATGGCACCTCTTTAAATTTTCTCAAAATACAAAGaaaaaaa
MBo54	M00842:287:000000000-BGGT4:1:2109:12551:5893	1	110	63	15	2	AG	GAGAGAGAGAGAGAGAGAGAGATAAGAGGAGAAAGAGAGAGAGAGAGAGAGAGAGAGAGAGAG	NA	1	1	14	1	124	CATATGCTGATACAagagagagGGGGAgggggAGGGGgagagagagagagagagagagaTAAGAGGAGAAagagagagagagagagagagagagagagagATGTCTGGATCCTGCTTATAAGGT	CATATGCTGATACAAGAGAGAGGG	ACCTTATAAGCAGGATCCAGACA	13	1	73	24	196	23	58.278	58.701	4.3	3.41	10.0209	G	263	TGGAAGTTCCAAAATTAGTCAACAACCATACAACATATGTTGAGATATgagagagagagagagaGCATATAACATATGCTGATACAagagagagGGGGAgggggAGGGGgagagagagagagagagagagaTAAGAGGAGAAagagagagagagagagagagagagagagagATGTCTGGATCCTGCTTATAAGGTAATCATGATAACATTATCTCTGAGATTTATATCCAACATCCCCAGGCAATTTATCAAGCATGGAGCA
MBo55	M00842:287:000000000-BGGT4:1:2111:10954:19728	1	156	30	15	1	AG	GAGAGAGAGAGAGAGAGAGAGAGAGAGAGA	NA	1	1	2	39	198	TGGAATCAACCTTGGGTCTACATAGAAAGAGTATAGGACCCTCTTGCTGGGTTAATTGAACgagagagagagagagagagagagagagagaGTGAAGGGAAAGACCTATGTGATTCTTTCTAAGAATGGAGGAAGAGGAAGTAGGAGGGATAGTGATGTGGTGATGTCGGTGGTGAGTAGTGGCTAGAAGACCGACGA	TGGAATCAACCTTGGGTCTACA	TCGTCGGTCTTCTAGCCACT	39	87	95	22	292	20	59.017	60.322	2.74	4	3.30547	A	456	ACCAGtttttttAAAGGATCAATGGGCTGGCCCAAAGAGGCTTCGGCCCATTGAAGTGCACTTGTGAtgtgtgtgCCAGTCCAGGGCCTTTTATTGGAATCAACCTTGGGTCTACATAGAAAGAGTATAGGACCCTCTTGCTGGGTTAATTGAACgagagagagagagagagagagagagagagaGTGAAGGGAAAGACCTATGTGATTCTTTCTAAGAATGGAGGAAGAGGAAGTAGGAGGGATAGTGATGTGGTGATGTCGGTGGTGAGTAGTGGCTAGAAGACCGACGACATGGTAAGAGTGAAGGGCAAATGATCGGTAGGAGGGCaaaaaaaaTAAGAAAATAAGGGAATGGCTTAGAACAGTGGTTTTGAGCTTCGTAGCAACTTGGCCTGCT…
MBo56	M00842:287:000000000-BGGT4:1:2111:9892:18603	1	39	30	15	1	AG	AGAGAGAGAGAGAGAGAGAGAGAGAGAGAG	NA	1	1	7	10	103	ACCAAGATCAAGCACGAGGAAGTGAGTGAAagagagagagagagagagagagagagagagGGATTAGGCCGAGAAAACATagaaagaaagaaAGGGTGATCCT	ACCAAGATCAAGCACGAGGA	AGGATCACCCTTTCTTTCTTTCT	10	20	9	20	111	23	59.023	57.409	3.71	2.52	6.56762	F	262	CTGTACCAACCAAGATCAAGCACGAGGAAGTGAGTGAAagagagagagagagagagagagagagagagGGATTAGGCCGAGAAAACATagaaagaaagaaAGGGTGATCCTtctctctctctctctctcCTTTTCTTTTATCTCTTCCCTcccccACCTACTTTGCCGTATCCAATGACTAGGGGTTCTTTGCTGTAcccccTTATGGATACGAGGAGATGTGAGAGGCATGGATTCGCCCCTCGCTGCAATGACTATTGGG
MBo57	M00842:287:000000000-BGGT4:1:2113:7810:10683	1	174	30	15	1	AG	GAGAGAGAGAGAGAGAGAGAGAGAGAGAGA	NA	1	1	6	32	136	GGGTTCAATCCTGATGAGAGCaaaaaTAGGgagagaTCgagagaGTGTGAGGGGgagagagagagagagagagagagagagagaCTACGATGCCtttttCATGGCCTcccccATCTACCATGGTTGATCGAACGGT	GGGTTCAATCCTGATGAGAGCA	ACCGTTCGATCAACCATGGT	32	32	120	22	255	20	60.093	59.676	4.26	3.55	2.41638	F	283	CGACTCCCTTTCTTCTCTGCCCGATAAGGAATACATGGAGGGGTGAAAACAAGgagagaTCGAGAGCCCACCTTGTCGGCAATAGTGACAATGACGGTGACCCTCCTGGTGGCATGCAAGGGTTCAATCCTGATGAGAGCaaaaaTAGGgagagaTCgagagaGTGTGAGGGGgagagagagagagagagagagagagagagaCTACGATGCCtttttCATGGCCTcccccATCTACCATGGTTGATCGAACGGTCGGGGTATCTCGTCTGCAcccccTTGCA
	M00842:287:000000000-BGGT4:1:1101:10277:18268	1	105	25	5	1	AAAAG	TTCTTTTCTTTTCTTTTCTTTTCTT	NA	1	1	4	20	127	TGGCCTAATCCTTGTTACAGAAGAGTCTGATACTCCATCCTCttcttttcttttcttttcttttcttTTTTGGCCTTTCTAtttttACTTGTAATGCTTATATGCACCTCATGTTAGTTTACTGTCG	TGGCCTAATCCTTGTTACAGAA	CGACAGTAAACTAACATGAGGTGC	20	36	63	22	189	24	57.08	59.908	3.02	5.01	9.01128	F	218	ACTTGGTATAAATCATGGAATTTTACACATTGTGCATCaaaaaaCCAATTCAAGATAGTAATTGGCCTAATCCTTGTTACAGAAGAGTCTGATACTCCATCCTCttcttttcttttcttttcttttcttTTTTGGCCTTTCTAtttttACTTGTAATGCTTATATGCACCTCATGTTAGTTTACTGTCGTATGACTTATGATGGAAGTCATTCAATGG
	M00842:287:000000000-BGGT4:1:1101:10388:5687	1	235	10	5	1	AT	ATATATATAT	NA	1	1	4	1	196	AGGCTAAACTAGTCACAACTCATCATACaaaaaaCCATGGAGACTTAAAAGAAGCACATATAATGTAGATATTCTACTCTAGTAGGAGATAAATTGTATACATAAACATaaaaaTATAAGCTTAGtttttAGTATTAGAAATCTAGGTTTGTTGaaaaaTAAatatatatatAGTGAAGCCACTAGAAATCAGAGA	AGGCTAAACTAGTCACAACTCATC	TCTCTGATTTCTAGTGGCTTCAC	138	1	73	24	268	23	58.275	57.922	2.92	3.18	10.8038	F	287	CTCTTCAGCTATCCAAAGAGTGAAAAGAGTTAAATAGAAATTCAGAATGATATCTAGATCAAGGTTAAATATAGGCTAAACTAGTCACAACTCATCATACaaaaaaCCATGGAGACTTAAAAGAAGCACATATAATGTAGATATTCTACTCTAGTAGGAGATAAATTGTATACATAAACATaaaaaTATAAGCTTAGtttttAGTATTAGAAATCTAGGTTTGTTGaaaaaTAAatatatatatAGTGAAGCCACTAGAAATCAGAGATATGTCAAATTAAAGATCG
	M00842:287:000000000-BGGT4:1:1101:10489:13938	1	278	10	5	1	AT	ATATATATAT	NA	1	1	4	81	242	GTCTCCTTCCAGACCTTCAGTGTGCAATCACTGTTGTATGTTATAGTCAGGAGCTAGATTCCTTTCGGGCCTAGCTAGTTGGGGCTATCACTAGCACATACTAatatatatatGTACTCCATGTGATTTTAGTTAAGTTTCTTTTAATGGTTAGGTGTTTCCTTTAATTGCTTATTCCACTACAAGaaaaaTGATTATTAGTGACAGCTAATCGCTATTGCTAATAAGTAGTTTGCCGTCAC	GTCTCCTTCCAGACCTTCAGTG	GTGACGGCAAACTACTTATTAGCA	81	105	175	22	416	24	60.029	59.372	3.66	3.49	6.6569	F	417	AGTTTATTTCATAGTTATTATGCCTACAAAATATAGTTATGTACACTTTTGTCCaaaaaaaTTTGTTATTTGATCAAGTATGAAATGGTTTACTTAAGCATGATATAATGCTTCATGATAAGAAATATTTTGTTTGTAGTACTTTCTAGTCTGACTACATGAGTTTATGATATAGTCTCCTTCCAGACCTTCAGTGTGCAATCACTGTTGTATGTTATAGTCAGGAGCTAGATTCCTTTCGGGCCTAGCTAGTTGGGGCTATCACTAGCACATACTAatatatatatGTACTCCATGTGATTTTAGTTAAGTTTCTTTTAATGGTTAGGTGTTTCCTTTAATTGCTTATTCCACTACAAGaaaaaTGATTATTAGTGACAGCTAATCGCTATTGCTAAT…
	M00842:287:000000000-BGGT4:1:1101:10819:23381	1	24	15	5	1	AGG	CCTCCTCCTCCTCCT	NA	1	1	4	2	112	GATCGGAAGAGCGGTTCCACCGcctcctcctcctcctTGGCCGAATCGGCAGTCTCAGGTGCCTCCTCGTTTCTGAAACAGGTCGTTATATCATGGAACTTGACCCTTCTTT	GATCGGAAGAGCGGTTCCAC	AAAGAAGGGTCAAGTTCCATGA	2	53	2	20	113	22	60.806	57.547	4.02	3.07	5.25997	A	419	AGATCGGAAGAGCGGTTCCACCGcctcctcctcctcctTGGCCGAATCGGCAGTCTCAGGTGCCTCCTCGTTTCTGAAACAGGTCGTTATATCATGGAACTTGACCCTTCTTTAGTTCCTCTGTTGTCTATACATCAATGGTCATTATGtttttAGTATCTGGATGTGTTCATGTGTTGATTACTTTGAACAATCAACAAACTTCTACTCAGGAATCCAATAAAGTAGCTTTGCAAGCTCAATGTAATTGcccccTGTCCCACATAgtgtgtTAGTTGATTTCCACCTGCGATTCTACAAATACATCTAAATGGGACAGTACTTCTCCTTTAGTTCACATGCCTTCCGGAAACCTGCTACCCTTGCTTTGTGACCCCTGAGACAGCAACATTATCAGTG…
	M00842:287:000000000-BGGT4:1:1101:11019:21339	1	235	10	5	1	AG	TCTCTCTCTC	NA	1	1	1	12	96	GTGTCAGATACATTTCCTTGAACCCTAGTTCCATTAAtctctctctcTTTATTTTATTGTTGCTACCATTCTCGCTAACTTGAGCGTCGGAGGATC	GTGTCAGATACATTTCCTTGAACCC	GATCCTCCGACGCTCAAGTT	12	29	198	25	293	20	59.876	59.826	4.11	2.66	5.29769	A	360	TAATAAtttttttaaaaaaTAGATTAATTACGACAAATTCTTATATTCGTCATAATAGATTCatatatTACGACGAATTTTAAAATTCATCGCAATAAATAtttttAAATTAATAATTATTTTaaaaaaTTGATTAATTACGACGAATTTGTTAATTCGTCGTAATAAGTTTGCCACaaaaaTCCCCTTTTCTTGTAGTGTCAGATACATTTCCTTGAACCCTAGTTCCATTAAtctctctctcTTTATTTTATTGTTGCTACCATTCTCGCTAACTTGAGCGTCGGAGGATCCCCACTGAAACAAcccccAGTGCATAGACTTCCCTATAGGTGCTCCATCATCGCCCGGATCACTGGC
	M00842:287:000000000-BGGT4:1:1101:12006:4076	1	269	10	5	1	AG	TCTCTCTCTC	NA	1	1	14	102	265	AGTTTGGAGTTTAGGGTTTGGGGTTTTGGCATTTTGGGTTTTGTGGTTTAGGGATTAGGGTTTAGGGTTTGGGGTTTAGGGTTTATAGTTTTAAGGtttttGGGTTTCTTTGGtttttAGGGTTtctctctctcCCTCTTTCactactactGCCATTCTTACTGATTTGAGCATCAAAGGGTCCCCATCGAAGCAACCCCTGGTGCATGGACTTCCTTGTAGGTGCTCTACCATCGTCCAGATCACCAGTGACCAcctcctcctA	AGTTTGGAGTTTAGGGTTTGGG	TAGGAGGAGGTGGTCACTGG	102	111	145	22	409	20	58.427	59.959	4.12	4	3.61388	F	465	GATTTAGGGTTTAGGGTAAGGGTTTCATAGTTTAGGGTTTAGGATTTTGGTTTTAGGGTTTTAGGGTTTTGGGTTTTAGGGTTTGGGGtttttAGTTTTAGGGTTTATGATTTATGGTTTTAGGATTTGGTATTTAAGGTTCAGAGTTTGGAGTTTAGGGTTTGGGGTTTTGGCATTTTGGGTTTTGTGGTTTAGGGATTAGGGTTTAGGGTTTGGGGTTTAGGGTTTATAGTTTTAAGGtttttGGGTTTCTTTGGtttttAGGGTTtctctctctcCCTCTTTCactactactGCCATTCTTACTGATTTGAGCATCAAAGGGTCCCCATCGAAGCAACCCCTGGTGCATGGACTTCCTTGTAGGTGCTCTACCATCGTCCAGATCACCAGTGACCA…
	M00842:287:000000000-BGGT4:1:1101:12128:7048	1	127	24	12	1	AG	CTCTCTCTCTCTCTCTCTCTCTCT	NA	1	1	3	49	185	TGGCActctctTCTGATTCGAACACTTTTCATTTGTTTTCTGCTGTTGttttttCTTTTAATTATTCTTCCAttttttttCCTTTCGATGActctctctctctctctctctctctGAGAAAGGAGATTCCTCACTTGGTTTCTGAAACACTGTCATTAGTTATATGAACATCCTTGTGAACCTGT	TGGCACTCTCTTCTGATTCGA	ACAGGTTCACAAGGATGTTCA	70	49	36	21	220	21	58.829	57.424	3.71	3.18	5.74708	F	318	ATATTCTGCAAATTATTATCAGACCAGGATAATTTTGGCActctctTCTGATTCGAACACTTTTCATTTGTTTTCTGCTGTTGttttttCTTTTAATTATTCTTCCAttttttttCCTTTCGATGActctctctctctctctctctctctGAGAAAGGAGATTCCTCACTTGGTTTCTGAAACACTGTCATTAGTTATATGAACATCCTTGTGAACCTGTTTCTTGTTGCATATCTCCTTGCCCATTTACCTTCCACTGTTGCACAATTTAGTTTTCTCATATTTGAATCACTTTTGGACACTTTTCAGTTATCTTCT
	M00842:287:000000000-BGGT4:1:1101:12744:20928	1	77	10	5	1	AT	TATATATATA	NA	1	1	3	18	96	ACCAAATCTGAGCCAAGATCCATTCAAGTGTAGCATAGTCtatatatataATGAAGTAAAGTAATCAAGAACATACCATCACAATCACATGGCAGG	ACCAAATCTGAGCCAAGATCCA	CCTGCCATGTGATTGTGATGG	18	25	37	22	132	21	59.69	59.592	3.41	3.51	3.71737	A	284	ATCGATGTGAAACCCTCATTGTTCATTTTAGACTTGACCAAATCTGAGCCAAGATCCATTCAAGTGTAGCATAGTCtatatatataATGAAGTAAAGTAATCAAGAACATACCATCACAATCACATGGCAGGTAGAACAAGCTagagagCCCTCACATGCTCCTGAGGCCAAGACATATAGGGTAAATGAAAATGAATAATGAACCCTaaaaaaaGATATGCCATATTTAACAATTTCTCATTCAACCACCCGGAGATTTAAGGTTCATGATTCACATAAACCT
	M00842:287:000000000-BGGT4:1:1101:12859:26852	1	64	16	8	1	AG	CTCTCTCTCTCTCTCT	NA	1	1	4	12	118	gggTGCACATTACGAGGGAAAGAACAACCAAGctctctctctctctctCACCCAGCTGCTTTTGAGTCTTCTCCCCAAGCTCTCCCTAGTGATTCCTCCCctctctTGAACAACGCCA	GGGTGCACATTACGAGGGAA	TGGCGTTGTTCAAGAGAGGG	12	50	32	20	149	20	60.036	60.25	3.97	4.3	0.286115	F	441	CTCGAGACAGGCAGAACAAAGTgggggAggggggTGCACATTACGAGGGAAAGAACAACCAAGctctctctctctctctCACCCAGCTGCTTTTGAGTCTTCTCCCCAAGCTCTCCCTAGTGATTCCTCCCctctctTGAACAACGCCACCACCGAATTTTGCCGAAAATTGCACCGATGACCCTTTGTGCACTGAGGTAAGGCTCTAAGCCtttttACATTTGGTTTTGAGTCGGATAAAGGAGATCCGGTGAAGTGCAAAGAGGGAAACCCCTGTAGTTGGTAGATTTGAGGGATCCAGTGACAATCGGCCATCCCTCACGGCTGCCGAAGTTGCAGGCAGTGCTAATAAAGGCTGGACGGGGCAATATTTGGGTGAATGGGGAGGGaaaaaCCATG…
	M00842:287:000000000-BGGT4:1:1101:13326:3709	1	86	10	5	1	AG	AGAGAGAGAG	NA	1	1	6	60	192	CTTCATTCTACGCGCCAACCTTCTCCACGtttttAATCAATTTTCACGAGTTTATCTTAATTTAAATAGGTGTAGGGATAagagagagagGCTTAAAATTTATCTaaaaaaaGTGATTAAGTGGCAGAAGGACTCTCAGTCCTTCTGCACCCCTTAATCTTGGCGCAAGCCTTATCTTGGCGCTAGGAGTCC	CTTCATTCTACGCGCCAACC	GGACTCCTAGCGCCAAGATA	60	82	6	20	197	20	59.626	58.671	3.77	1.98	1.70297	F	200	CGTCCCTTCATTCTACGCGCCAACCTTCTCCACGtttttAATCAATTTTCACGAGTTTATCTTAATTTAAATAGGTGTAGGGATAagagagagagGCTTAAAATTTATCTaaaaaaaGTGATTAAGTGGCAGAAGGACTCTCAGTCCTTCTGCACCCCTTAATCTTGGCGCAAGCCTTATCTTGGCGCTAGGAGTCCGAA
	M00842:287:000000000-BGGT4:1:1101:13546:23387	1	90	10	5	1	AC	TGTGTGTGTG	NA	1	1	2	34	127	GTTCATCCCTCTGTCCCAGCAAAGCTATCTTTTCTTCCtttttGTCTTTCCATAGAATTCTGCtgtgtgtgtgTAGAGGTGCTTGATTTCAGCAGCAAGTTTGATCAAGCCCACCATTGCTTCAACT	GTTCATCCCTCTGTCCCAGC	AGTTGAAGCAATGGTGGGCT	43	34	27	20	153	20	60.107	60.179	4.85	5.19	0.286412	F	264	GACCTCAtttttAAAGAGTATCCTCAGTTCATCCCTCTGTCCCAGCAAAGCTATCTTTTCTTCCtttttGTCTTTCCATAGAATTCTGCtgtgtgtgtgTAGAGGTGCTTGATTTCAGCAGCAAGTTTGATCAAGCCCACCATTGCTTCAACTTCAACATTGCTATCAGAGCAAGCCAGGTTGGAGATCATCAAGAAGAGAAGACTCAACACAGAGGGCTTCCCAAGGCAAGGTGATTCTGCAGAAAtttttCTGGTAAAATCT
	M00842:287:000000000-BGGT4:1:1101:13678:27721	1	148	10	5	1	AG	TCTCTCTCTC	NA	1	1	4	11	165	GCTGATGGGAGCAGGTTGTAGGTCAGTGTGAGGATGCCAATGGCGAAGGTAgaggaggagGGGGTAAAGAAAAGGCTAAGAGTTGAGAGGATGGCATCACGACATCACTACTGGTTCCTCCTCTtctctctctcCAATGTTGCTGCCAAAGCcacacacaAGCTC	GCTGATGGGAGCAGGTTGTA	GAGCTTGTGTGTGGCTTTGG	104	11	24	20	188	20	59.747	59.969	2.41	3.28	0.284222	F	434	TATCaaaaaaaCTAATAAATTATGCTGATGGGAGCAGGTTGTAGGTCAGTGTGAGGATGCCAATGGCGAAGGTAgaggaggagGGGGTAAAGAAAAGGCTAAGAGTTGAGAGGATGGCATCACGACATCACTACTGGTTCCTCCTCTtctctctctcCAATGTTGCTGCCAAAGCcacacacaAGCTCTGCCCTTGCTGCTctcctcctcctcTTTGGATCTCACCCATGATCCAACATCActctcttcctcctccTTGAATCTCACCTGCAACCTGATGCTACCCTTTTCCTACTCCTCAAATCTCACCCATGACCCAACATCACTCGCTtcctcctccTTCAATCTTGCCCATGACCTCGACTTGGCCTCTtctctctcTTCTTCAAATCTCTTCTA…
	M00842:287:000000000-BGGT4:1:1101:14275:19420	1	166	10	5	1	AC	TGTGTGTGTG	NA	1	1	6	22	115	GAGATGTGCCCAGGGTAGTGCCCTCGTgggggCAATTTGGTGTGAAGCCtttttCCACTTAGCtgtgtgtgtgGAGGTGACTTTATTGGAATCGACATTGAGGTGTGCACGAAGC	GAGATGTGCCCAGGGTAGTG	GCTTCGTGCACACCTCAATG	43	22	103	20	217	20	59.821	60.11	2.74	2.82	0.289056	F	234	GTCTTGAGAATGCTTGTTCAGATTTGAAGTGCATAGGACTCTATCTTCATTATAGACTATACCCGAGGTGTGCCTGAGAGTGTCTTCTTTAGATCTAGCATCGAGATGTGCCCAGGGTAGTGCCCTCGTgggggCAATTTGGTGTGAAGCCtttttCCACTTAGCtgtgtgtgtgGAGGTGACTTTATTGGAATCGACATTGAGGTGTGCACGAAGCAATGTCCTCATAGGGGC
	M00842:287:000000000-BGGT4:1:1101:14444:24561	1	198	10	5	1	AT	TATATATATA	NA	1	1	2	20	184	TCATGGAGCATGCAATTGGCAGAGTATCAATTTCATTGCTGAAtttttGGATGAACATACATAACCACAGGATAAAGCATCTTTAATGTCCAAAAGATATCGGTACTAAATAAATATTAATAATATTCAAGtatatatataAAGAAAATATGAGTCCTGCAAACATGCCAATCTATGCAAATGA	TCATGGAGCATGCAATTGGC	TCATTTGCATAGATTGGCATGTT	111	20	67	20	250	23	59.538	57.398	4.52	2.71	6.06396	F	306	CTATTAAGCCTGGTTATTCAAAGTTGAATTCAATGAAGAACAAAATGCTTCTTCAAGTTTTATTCCTCATGGAGCATGCAATTGGCAGAGTATCAATTTCATTGCTGAAtttttGGATGAACATACATAACCACAGGATAAAGCATCTTTAATGTCCAAAAGATATCGGTACTAAATAAATATTAATAATATTCAAGtatatatataAAGAAAATATGAGTCCTGCAAACATGCCAATCTATGCAAATGAAACTAACAAAGAAAATCATCAACAATCTAGTAAAATGTTCaaaaaaaaGAAGAAGG
	M00842:287:000000000-BGGT4:1:1101:15336:7384	1	223	10	5	1	AG	TCTCTCTCTC	NA	1	1	8	68	223	CCTTAGGGCCTAGTGAAGAGGCCATCAATCTGATTCACTGACCTAAGTTGACCCCGATATGAGGCCCAAACCTCCTAGACGATTGGATCAATCGACTACACCAACTATCTTGTTTCTTCCTCTAGtctctctctcTAGAAACTCCCtttttAATTaaaaaaTAATGATATAAAatatatatGTTGATCAGAtttttAGATATTTGTAGAGCGACAGACTTGGA	CCTTAGGGCCTAGTGAAGAGG	TCCAAGTCTGTCGCTCTACA	104	68	98	21	320	20	58.957	58.094	3.69	2.74	3.94887	F	322	aaaaataaataaataaaGGAAGAAAGAGATGAGAGGAAGGAagagagagagTCACTTtctctcTAttttttCTTTCCAAAtttttATTTGAAGATAACCTTAGGGCCTAGTGAAGAGGCCATCAATCTGATTCACTGACCTAAGTTGACCCCGATATGAGGCCCAAACCTCCTAGACGATTGGATCAATCGACTACACCAACTATCTTGTTTCTTCCTCTAGtctctctctcTAGAAACTCCCtttttAATTaaaaaaTAATGATATAAAatatatatGTTGATCAGAtttttAGATATTTGTAGAGCGACAGACTTGGAGA
	M00842:287:000000000-BGGT4:1:1101:16371:2280	1	359	10	5	1	AG	CTCTCTCTCT	NA	1	1	2	0	208	GCCGTTAGGATGGTTGCAGTCAACAAATGGCTATCTAATGTCACTGTTCGTCTAAGCTTATCTCAATGGATGAATGTTTGGCTAGTGTCGTTGTTTGATCGAGCTtctctctcCCCTTCCCACTGCCTATTTAAAGTCCCTTCTATTTTGTTCACTAGGCCACGCCCTTGTTCTTCCCctctctctctTCCTCTGCCTTCTTGGTGGA	GCCGTTAGGATGGTTGCAGT	TCCACCAAGAAGGCAGAGGA	158	0	181	20	388	20	60.677	60.474	4.4	3.71	1.15048	B	410	GTCCATCTGTTTATAGTGACCCTAGTTGAATGCATAAGGTAAGAACTAGGTCTACTAAGGCTGCCATAGATCAAATTCAACATGCTTAGCTAGCtttttCTCACaaaaaaaaTaaaaaaTAGAGGTGATTGGAATAGGGGATTGTGATCCTTTGCTACCAAACCcacacaACAGCCCATGGCCGTTAGGATGGTTGCAGTCAACAAATGGCTATCTAATGTCACTGTTCGTCTAAGCTTATCTCAATGGATGAATGTTTGGCTAGTGTCGTTGTTTGATCGAGCTtctctctcCCCTTCCCACTGCCTATTTAAAGTCCCTTCTATTTTGTTCACTAGGCCACGCCCTTGTTCTTCCCctctctctctTCCTCTGCCTTCTTGGTGGATAGAATGCCAT…
	M00842:287:000000000-BGGT4:1:1101:16580:10624	1	125	10	5	1	AC	CACACACACA	NA	1	1	5	17	170	agagagTGTTGCCCTTAAGTGAtttttttATTATGCATGcacacacacaAGATCTATGCAACATAAAACTAAAGTAAAATATGTAGGTTTCAAATCTGAGTTTTAAGGTAAAGATTGTATATTTAAAGTAGACtaataataaTTAAAATGGATGCAAAGTTGAACTATGA	AGAGAGTGTTGCCCTTAAGTGA	TCATAGTTCAACTTTGCATCCATTT	17	96	86	22	255	25	59.027	57.769	3.41	2.32	10.2036	F	310	TACTTGATTTTAATTAGGATTGGGTTCATGATGAGGGTAGTTGTTTCTGGGCCAAGGAAAGGTGATGAAATCCTTACCTTATCTTagagagTGTTGCCCTTAAGTGAtttttttATTATGCATGcacacacacaAGATCTATGCAACATAAAACTAAAGTAAAATATGTAGGTTTCAAATCTGAGTTTTAAGGTAAAGATTGTATATTTAAAGTAGACtaataataaTTAAAATGGATGCAAAGTTGAACTATGATTTAAGGGTTTTAATGAAAACAAATTTTAGCCCTAATCTAAATATGTAGAAATTT
	M00842:287:000000000-BGGT4:1:1101:16613:17680	1	235	16	8	1	AG	GAGAGAGAGAGAGAGA	NA	1	1	8	0	235	CGGTTGTTGAGAACTCAGCCCCAATCCTCACTATGGTCACAAGGAAAGGGGATGGAGTCCCCAAGGAGCTCCTATGTCCTGAACATTCTCACAAAGAAAAGAAATAGGAATAGTTACCTCAGCTCCAAGACTTGTTGGTGACGATGGCTCTCCGACAAGCACACGCATGTTCAAAGAGTGGTCATAGTCATGCATgagagagagagagagaGCACAAACATGAAGAAagagagAA	CGGTTGTTGAGAACTCAGCC	TTCTCTCTTTCTTCATGTTTGTGC	175	0	40	20	274	24	59.132	57.935	4.85	4.57	6.93325	F	284	GTAATCCCTCATGGCTACCAAGCTCCCTAGCAACCACAACGGTTGTTGAGAACTCAGCCCCAATCCTCACTATGGTCACAAGGAAAGGGGATGGAGTCCCCAAGGAGCTCCTATGTCCTGAACATTCTCACAAAGAAAAGAAATAGGAATAGTTACCTCAGCTCCAAGACTTGTTGGTGACGATGGCTCTCCGACAAGCACACGCATGTTCAAAGAGTGGTCATAGTCATGCATgagagagagagagagaGCACAAACATGAAGAAagagagAAATAAGAAAAT
	M00842:287:000000000-BGGT4:1:1101:17525:2716	1	66	10	5	1	AG	AGAGAGAGAG	NA	1	1	3	34	143	AGCCAAAGTGGTTGTAAGCCTGAGAGGTTGCTGAAAATTGAAGAGGTTGAGGCGAagagagagagAAGGGTGAAGTAACTCTTGACCCTTCGATAAGTCATGTTGCCTGTTCTTCAACCGTAGCGTGATGACATGGCCGAATT	AGCCAAAGTGGTTGTAAGCCT	AATTCGGCCATGTCATCACG	34	58	11	21	153	20	60.133	58.983	4.58	4.35	2.15011	A	404	CAATGGTGTAAGCCAAAGTGGTTGTAAGCCTGAGAGGTTGCTGAAAATTGAAGAGGTTGAGGCGAagagagagagAAGGGTGAAGTAACTCTTGACCCTTCGATAAGTCATGTTGCCTGTTCTTCAACCGTAGCGTGATGACATGGCCGAATTAGTAGGCATTCTTTATTTCTTACTCCAAACTCAATGGAGTAAtttttCAAGTATTACACTTGTTATCATCTGAAAGATGCTCGATCGACTGCCCTGCCCCAAAGGCTCCCTGAGGCCAACCTGCCACTGCTGCAAACCGAGGCAAGAAGATCAACCCGGACCaaaaaaTTTTGGGCCAGCCAATCCGAGGCCTCATCCACCAATCTGACCAGTGCGGTCCTTTACCCTAAGCCACAATGGCCAACC…
	M00842:287:000000000-BGGT4:1:1101:17706:2403	1	54	10	5	1	AC	CACACACACA	NA	1	1	1	5	116	GAAATGTGGCAACCCAGTCGTTAATcacacacacaaaaaaaaaaGAAAATGAAAACTACCCAAAATTACATCATTaaaaaTATGAATCTTAATTATACTATGGAGCATTGGCACTC	GAAATGTGGCAACCCAGTCG	GAGTGCCAATGCTCCATAGT	5	61	29	20	144	20	59.759	57.661	4.18	2.12	2.57952	F	166	AGATCGGAAGAGCCCCAAGCTAGATCTAGAAATGTGGCAACCCAGTCGTTAATcacacacacaaaaaaaaaaGAAAATGAAAACTACCCAAAATTACATCATTaaaaaTATGAATCTTAATTATACTATGGAGCATTGGCACTCCTACTACTTTCTaaaaaaaTAG
	M00842:287:000000000-BGGT4:1:1101:17896:19699	1	60	24	12	1	AG	TCTCTCTCTCTCTCTCTCTCTCTC	NA	1	1	2	19	152	CTCTTTGCATAGGTGTTACCACAAAATCATGCATGAAGTCATtctctctctctctctctctctctcAATAAGATCATTCTTTTCttttttATTGCAAGGAGTTGCACTGTGCCAAGCAGGTTTCAGGTTTTGCTTTGCTATTTACCATGACA	CTCTTTGCATAGGTGTTACCACA	TGTCATGGTAAATAGCAAAGCAA	19	63	18	23	169	23	58.677	57.026	4.17	3.91	10.2973	F	230	CTGGAAGTTTCttttttCTCTTTGCATAGGTGTTACCACAAAATCATGCATGAAGTCATtctctctctctctctctctctctcAATAAGATCATTCTTTTCttttttATTGCAAGGAGTTGCACTGTGCCAAGCAGGTTTCAGGTTTTGCTTTGCTATTTACCATGACAtttttAACTAGATTATAACCGGATTGATTCCTTTTAATGGCACTATTGGCTCTTCCGATCT
	M00842:287:000000000-BGGT4:1:1101:18686:25771	1	56	10	5	1	AG	TCTCTCTCTC	NA	1	1	4	2	92	GGGAGGACCATACTTGTTCAATTtctctctctcAACCCGGATGGCGAGGTTGGTCCTTATTGTATCTCGCTCGCTGACTTGACTTGCGCATC	GGGAGGACCATACTTGTTCAA	GATGCGCAAGTCAAGTCAGC	2	39	33	21	124	20	57.286	60.179	2.69	4.26	3.89303	A	209	CCCCAtttttGTTTCATAGTACATCCCCATAGGGGAGGACCATACTTGTTCAATTtctctctctcAACCCGGATGGCGAGGTTGGTCCTTATTGTATCTCGCTCGCTGACTTGACTTGCGCATCTCGTATCTTGCATATCGAACTTGCACTTGCTCACCTTTCCCGCCCTGCTCGATTTTCTAACCTTGATTTGCTTCTTGACTTTCGG
	M00842:287:000000000-BGGT4:1:1101:18756:23790	1	221	30	5	1	AAATTT	AATTTAAATTTAAATTTAAATTTAAATTTA	NA	1	1	2	70	230	AGTGGGCATCCAAAGAGGTTAAGAGAAATTagagagTTTTGGGAATAAGGATGTGATAAGGTGGTTTTAATTCAAAATaaaaaCCAACTCaatttaaatttaaatttaaatttaaatttaAATCCTAATTTGAATTCAAATTTAAATCTAAAATTCAAATTCAAAACTTAAAATTTAAAATTTAAAATTTAAATTTTGAATTCACATGAAGCATGGGAATTTGGGTGCAT	AGTGGGCATCCAAAGAGGTT	ATGCACCCAAATTCCCATGC	70	90	131	20	360	20	59.22	59.457	3.5	4.06	1.3228	F	421	AGAACCTAGGAGTCCCATGCCCAAGAGAAGACCcttcttcttCCAAAACCCCAAAGACCTATCTTACTTTTGATCTAAttttttttttACTCATTCCTCTTTCCACATATCACCTATCAACTCCTTTAATAGTGGGCATCCAAAGAGGTTAAGAGAAATTagagagTTTTGGGAATAAGGATGTGATAAGGTGGTTTTAATTCAAAATaaaaaCCAACTCaatttaaatttaaatttaaatttaaatttaAATCCTAATTTGAATTCAAATTTAAATCTAAAATTCAAATTCAAAACTTAAAATTTAAAATTTAAAATTTAAATTTTGAATTCACATGAAGCATGGGAATTTGGGTGCATGCGATATAATCCAATCTAGTTGGGCTCGAGCTTAATTGA…
	M00842:287:000000000-BGGT4:1:1101:18780:2947	1	115	20	10	1	AG	CTCTCTCTCTCTCTCTCTCT	NA	1	1	4	38	171	CTTTCCTGACCTCCAGCACCACCCCGACGGcaacaacaaCTATCGGAGGTGAGAAagagagGCTCGCCCTCTCCCACTTACACCTTACCATCActctctctctctctctctctTCCTTCTCCTTCTCGTGCATCaaaaaTCATACGTGAGAaggaggaggAAAGATGGCCT	CTTTCCTGACCTCCAGCACC	AGGCCATCTTTCCTCCTCCT	73	38	22	20	192	20	60.322	59.955	5.01	3.69	0.367478	F	268	GTGCCAAGGGCATGCTAGCCCCTTTCCTGACCTCCAGCACCACCCCGACGGcaacaacaaCTATCGGAGGTGAGAAagagagGCTCGCCCTCTCCCACTTACACCTTACCATCActctctctctctctctctctTCCTTCTCCTTCTCGTGCATCaaaaaTCATACGTGAGAaggaggaggAAAGATGGCCTCTAGTCGATAGTGGGCCTTAGGCCAACCCACTATagagagagagGGAAGCCgagagaGGAAGAAAAGAGAAGGGGA
	M00842:287:000000000-BGGT4:1:1101:18865:27495	1	106	84	16	2	AT	ATATATATATATATATATATATATATATATATAAATAGAATAAGACATACATACATACACACACACACACACACATATATATAT	NA	1	1	2	29	189	GGCCTATGGGAATGACCTGTTAAGATAGTTAAATAAACAATAACAATAATGACAatatatatatatatatatatatatatatatatAAATAGAATAAGacatacatacatacacacacacacacacacatatatatatAGACAGAATAAGGCATAGATACAGATCAAACGTAAATCATCCACTAACCCA	GGCCTATGGGAATGACCTGT	TGGGTTAGTGGATGATTTACGT	34	29	52	20	240	22	59.153	57.17	4	3.57	5.67657	D	290	GCAACACCCTGACTGTGCAAATTTGCAGGGTCCACCCTATAATTTGCACGAGGCCTATGGGAATGACCTGTTAAGATAGTTAAATAAACAATAACAATAATGACAatatatatatatatatatatatatatatatatAAATAGAATAAGacatacatacatacacacacacacacacacatatatatatAGACAGAATAAGGCATAGATACAGATCAAACGTAAATCATCCACTAACCCAGTCCACCCGATCGGTCACAAAACtatatatatatatatatatatatataT
	M00842:287:000000000-BGGT4:1:1101:18936:28716	1	138	10	5	1	AC	ACACACACAC	NA	1	1	4	53	214	GGAAGAGAACTCCTTAGAAGGCAATTAACTCCTGTTCTATGCTATAAGAACCAGGaaaaaCAGAGCATAGaaaaaaaTTTGAGGAAGAACACATCAacacacTGTTATTTCTttcttcttcTCTAATacacacacacaaaaaaaaaaaaCAATCCCTGGGATGTTTAAATAGACCCTCTAATCCACCAAAACATGGATCAATCAACAAGCTTGA	GGAAGAGAACTCCTTAGAAGGCA	TCAAGCTTGTTGATTGATCCATGT	104	53	11	23	224	24	59.484	59.232	4.75	3.21	8.28435	F	427	GGCATCTATTGGAAGAGAACTCCTTAGAAGGCAATTAACTCCTGTTCTATGCTATAAGAACCAGGaaaaaCAGAGCATAGaaaaaaaTTTGAGGAAGAACACATCAacacacTGTTATTTCTttcttcttcTCTAATacacacacacaaaaaaaaaaaaCAATCCCTGGGATGTTTAAATAGACCCTCTAATCCACCAAAACATGGATCAATCAACAAGCTTGACTCATACTTCAAGAAGGATTACAACaaaaaTaaaaaCTCCCTAAGAACTTTAATTTCATCTGGACTTCTTCCCCAGACTTTTGATTTAACTAGGAttcttcttcCATCTAAATTCTGGTCTTTGAATCAACTTTCAACACTcccccTTGATTCAAAGTTGCATACTCAGCTACTG…
	M00842:287:000000000-BGGT4:1:1101:19058:27292	1	85	20	10	1	AG	AGAGAGAGAGAGAGAGAGAG	NA	1	1	2	26	143	GTTCTAGTGAGGACCCTCTGATACTCAAGTCAGCAAGATTGGCAACAACAGTAAAATaaaaaGAGAAGAAAGAAGAAagagagagagagagagagagTTGTGAAGTATGTGAAGTGAAATGTGGGCATGGATGGGTCTGTGAT	GTTCTAGTGAGGACCCTCTGA	ATCACAGACCCATCCATGCC	56	26	8	21	150	20	57.911	59.816	3.27	4.4	3.27324	F	150	GAAAATAGTTCTAGTGAGGACCCTCTGATACTCAAGTCAGCAAGATTGGCAACAACAGTAAAATaaaaaGAGAAGAAAGAAGAAagagagagagagagagagagTTGTGAAGTATGTGAAGTGAAATGTGGGCATGGATGGGTCTGTGAT
	M00842:287:000000000-BGGT4:1:1101:19068:24001	1	149	14	7	1	AG	TCTCTCTCTCTCTC	NA	1	1	2	44	206	AAGCTCATAGGTGGCACGActctctTGCGAGcacacaTTCAGAAAGTGGTTATAATTGCTGgagagagaGGGCAAGACaagaagaagaagAGAAAGCAAACAAACCTGAGGAGGGAGAGGGGTTTGATtctctctctctctcTTCTTCATTTATATTTTCTCACCTAcccccGGCCGCATCCAACAGCCTAATCATCCGCACCGTA	AAGCTCATAGGTGGCACGAC	TACGGTGCGGATGATTAGGC	108	44	21	20	226	20	60.108	59.967	4.34	3.93	0.14109	F	245	GGGAAGGTACCTCAGCTTCAAAGCTCATAGGTGGCACGActctctTGCGAGcacacaTTCAGAAAGTGGTTATAATTGCTGgagagagaGGGCAAGACaagaagaagaagAGAAAGCAAACAAACCTGAGGAGGGAGAGGGGTTTGATtctctctctctctcTTCTTCATTTATATTTTCTCACCTAcccccGGCCGCATCCAACAGCCTAATCATCCGCACCGTACTCAGATACGGATTCAAGG
	M00842:287:000000000-BGGT4:1:1101:19219:27538	1	80	39	11	1.5	AG	GAGAGAGAGAGAGAGAGAGAGAAAGAGAGAGAGAGAGAG	NA	1	1	5	12	125	TGAGATGTAGAAACCATTACCGCAGATAGAAACAACgagagagagagagagagagagaAagagagagagagagagCATACTAGCTGGTACTCACTTTAGTTGTAGAACCACTCTTCTCCATGGCC	TGAGATGTAGAAACCATTACCGCA	GGCCATGGAGAAGAGTGGTT	12	30	44	24	168	20	60.081	59.67	5.69	3.67	4.41096	B	175	GTAGATCGGAATCTACatatatGAGATTCATATTCAAGTAGTATGAGATGTAGAAACCATTACCGCAGATAGAAACAACgagagagagagagagagagagaAagagagagagagagagCATACTAGCTGGTACTCACTTTAGTTGTAGAACCACTCTTCTCCATGGCCATGTTGC
	M00842:287:000000000-BGGT4:1:1101:19448:6199	1	82	24	12	1	AG	AGAGAGAGAGAGAGAGAGAGAGAG	NA	1	1	3	17	197	TGGGTGCTGCCTAGAAGTTGATGAAATAAAATATTTTagagagagagagagagagagagagATGATAGCTGATATAATGTGATGGTGATGTCTATGTTTATGAGGGTTAATAAAATGATTATTATATTAAAACCAGGGTTagagagGAGTTAAGGTTAGGAACTTAGGGTTAAGCAGGACCAAGTGGGAGGGAGGTT	TGGGTGCTGCCTAGAAGTTG	AACCTCCCTCCCACTTGGT	17	117	45	20	241	19	59.963	60.073	3.16	3.67	1.10966	B	250	GGCTTAAGCAAGCTTCAGCCTTTGGAGAAATGGAGACgagagaGTGGGTGCTGCCTAGAAGTTGATGAAATAAAATATTTTagagagagagagagagagagagagATGATAGCTGATATAATGTGATGGTGATGTCTATGTTTATGAGGGTTAATAAAATGATTATTATATTAAAACCAGGGTTagagagGAGTTAAGGTTAGGAACTTAGGGTTAAGCAGGACCAAGTGGGAGGGAGGTTGCTGCAGCT
	M00842:287:000000000-BGGT4:1:1101:19470:14891	1	268	10	5	1	AG	GAGAGAGAGA	NA	1	1	3	28	140	TCAGCAGATGGTCAAGTTGGGTTGATCCAGCACAGTCACTACTTGGAGGGATGTGGCCAAAGAGTTACTCTGTGCTAGCGAGgagagagagaAGACCCTCTCAAGGGAAGTCGAGCAGCTGCAACACGAGCTGTCATCAG	TCAGCAGATGGTCAAGTTGGG	CTGATGACAGCTCGTGTTGC	61	28	186	21	325	20	60.272	59.558	4.12	4.17	1.71308	A	342	CTTTCCATGGGACTGGCAGGTGATGGTGtctctcAACAGATAGAACGTCGTGGCTATGATGCACTCAGGCATCATCAGGGTAAGTTGTAGCTCGAGCTCCACTTGTGATTGTCTTTTGAAGAGAAACTCTAACTATTCTTATCTCTATAGCTCATTCATGGAATCACATTCATGGATGAGTACACTCAGCAGATGGTCAAGTTGGGTTGATCCAGCACAGTCACTACTTGGAGGGATGTGGCCAAAGAGTTACTCTGTGCTAGCGAGgagagagagaAGACCCTCTCAAGGGAAGTCGAGCAGCTGCAACACGAGCTGTCATCAGCAAAGGATGTGATTGCA
	M00842:287:000000000-BGGT4:1:1101:19692:2896	1	38	50	9	2	AG	TCTCTCTCTCTCTCTCTCTATCTATCTATTTATCTATCTATCTATCTATC	NA	1	1	5	1	92	GGAAGGGAGAGGTGGCTCTTtctctctctctctctctcTATCTATCTATTtatctatctatctatctatcTGCGATTGTAGCCGAGGGATGG	GGAAGGGAGAGGTGGCTCT	CCATCCCTCGGCTACAATCG	1	2	18	19	109	20	60.307	60.32	4.09	3.34	1.62647	D	321	GGAAAAGGATgagagaAGGAAGGGAGAGGTGGCTCTTtctctctctctctctctcTATCTATCTATTtatctatctatctatctatcTGCGATTGTAGCCGAGGGATGGCCACCGTgggggAGCACATTTGACCAGCCGGTGCTTGGCAGCCATAGgttgttgttGGCCATGAGACACCAAGAGCTCTGCTGGGCCGACTGTGGGCCTATGAGCacaacaacaGTGGACGGCCCAATGGGTCGATAAAGGGCTAGCGGCCCAATAACTGTAGCAAGGCCTAATAGGCCAAGGATGGGCCAGTTAGCCCGTGAATTGCGAAA
	M00842:287:000000000-BGGT4:1:1101:19919:26019	1	306	16	8	1	AG	TCTCTCTCTCTCTCTC	NA	1	1	3	54	189	GCAATGAAATGCTTGAGCCTAGAttttttATTATTAAGAAGTTTCCAAGATaaaaaaaaaaaaGCATACTTATCTTTAATGTACTTTATTTTCTTCGAtctctctctctctctcCCAcccccAAGTTCACCATCCCCGACCCCGGTTCAAAACTCCATTCCCAAGCCCCAtctctctcTGGGCAAAGGA	GCAATGAAATGCTTGAGCCT	TCCTTTGCCCAGAGAGAGATG	78	54	208	20	396	21	57.333	59.164	4.58	2.9	4.50364	F	457	TATTATGAATGATACTGAGATATTACCATTCTTTTATCCCAACAATATTGTCAGTGATCTCTTACCCTAACCTGCTGTCGACTTGTACAGTTTTAAAAGGACTTCTTGGTGGTTCAGgagagaAAATATACTTAAATTTATCTATTAAGTTAATCTGTGCAATGCCGAATTATTCCCATCCCCTCACAATAATTATGAACCTATTAAGCAATGAAATGCTTGAGCCTAGAttttttATTATTAAGAAGTTTCCAAGATaaaaaaaaaaaaGCATACTTATCTTTAATGTACTTTATTTTCTTCGAtctctctctctctctcCCAcccccAAGTTCACCATCCCCGACCCCGGTTCAAAACTCCATTCCCAAGCCCCAtctctctcTGGGCAAAGGATAT…
	M00842:287:000000000-BGGT4:1:1101:20048:24633	1	142	20	10	1	AC	ACACACACACACACACACAC	NA	1	1	2	33	139	TGCATAGACATAGGGTGAAGGGGAAGAAGGAAAGATATTGTAAATAACTCAACCTTTGCTTTGGATacacacacacacacacacacAGAGTTAAAATTTTGGATACCCATCATAGTGTATGGGAAGACTAGTGACCGAT	TGCATAGACATAGGGTGAAGGG	ATCGGTCACTAGTCTTCCCA	44	33	76	22	214	20	59.294	57.473	3.95	4.37	5.23255	A	250	ATATTTTCTGTTTTCACAGGTGATAAAcccccAGACCACCCGAGAGTTAAGAGGCCTTAATAGGCTTAagagagATGCATAGACATAGGGTGAAGGGGAAGAAGGAAAGATATTGTAAATAACTCAACCTTTGCTTTGGATacacacacacacacacacacAGAGTTAAAATTTTGGATACCCATCATAGTGTATGGGAAGACTAGTGACCGATCGTGTAGACCAAATATGATGGATGTTATTGTGTTCT
	M00842:287:000000000-BGGT4:1:1101:20879:3914	1	243	20	10	1	AG	GAGAGAGAGAGAGAGAGAGA	NA	1	1	5	33	143	TTCCACCCATACTGGAGGGTGGAAGAGGGAGAGTGAAATTAGgagagaGCAATgagagaTCATGGgagagagagagagagagagaGGCAAGtctctcTTCTCGCctctctCCTCTCCTTCCTGCTTCTTCCTTTCATTTGAAC	TTCCACCCATACTGGAGGGT	GTTCAAATGAAAGGAAGAAGCAGGA	45	33	178	20	320	25	59.88	59.99	4.34	3.86	5.13039	B	452	AAAGaaaaaGGGAAAAGAGGCagagagagagTAGAGGGAAGCTAAGCAGGGCTCACtcttcttctctttctttctttctttCTCCTTTGTTTTCtttttttttctctctctTTtctctcTTCATTATTTCTTTTCACTTCAtttttttGAAGTTTCTAGGCTCTtctctcCCTTCTATTCCACCCATACTGGAGGGTGGAAGAGGGAGAGTGAAATTAGgagagaGCAATgagagaTCATGGgagagagagagagagagagaGGCAAGtctctcTTCTCGCctctctCCTCTCCTTCCTGCTTCTTCCTTTCATTTGAACATCACTATTTcccccTCACAGTGGCTCACCCAAGCCTTTATCCAagagagATAGCTTGGaaaaaaaCTCTTAGGTTGCA…
	M00842:287:000000000-BGGT4:1:1101:21057:10619	1	39	25	7	1.5	AG	AGAGAGAGAGCGAGAGAGAGAGAGA	NA	1	1	10	8	120	TGTTGGATCTTACCATGATGGCAAGATATAagagagagagCgagagagagagagaGTGAGGAATCTTTTGtgatgatgaAACTGATTGAGCagagagagGGAGGAATCTTGGATCTTCCC	TGTTGGATCTTACCATGATGGC	GGGAAGATCCAAGATTCCTCC	8	44	9	22	128	21	58.445	57.5	4.4	4.3	7.05538	B	279	TAGAAGGTTGTTGGATCTTACCATGATGGCAAGATATAagagagagagCgagagagagagagaGTGAGGAATCTTTTGtgatgatgaAACTGATTGAGCagagagagGGAGGAATCTTGGATCTTCCCCAATCTAGACATCTAGACCAAAGCACTAGTGAGAAACTATTCTCCACCTCCAATAGAGCGGTGCTATTGTTAGAGGCCTCaaaaaTTATGAGATTGAGGATCGAAGAGTAGATTGATGGTTTGAACCAATagagagAATGTTAAGTTAAGG
	M00842:287:000000000-BGGT4:1:1101:22046:12049	1	66	10	5	1	AT	TATATATATA	NA	1	1	3	38	140	TTGTCTACTGAACAATACAACCCATGAGCAGTCTATAACACCTTTAatcatcatcTTCTATCtatatatataATATTATAATTTTCtttttCTTATCAATGTATAGCCCACCTATAAATCCATTACAGGTGCCTCACAGT	TTGTCTACTGAACAATACAACCCA	ACTGTGAGGCACCTGTAATGG	38	47	4	24	143	21	58.069	59.996	4.51	3.16	6.93487	F	296	TATTTGTCTACTGAACAATACAACCCATGAGCAGTCTATAACACCTTTAatcatcatcTTCTATCtatatatataATATTATAATTTTCtttttCTTATCAATGTATAGCCCACCTATAAATCCATTACAGGTGCCTCACAGTATAAAATTAATATCCATACGTACTATCAAATATGGCATGTAGTATAGTCAGTACATATCCATCCATACAAACATACAATGAAAGCACGTGCTCCTATGCAGATCCAGATGTTTTGTaaaaaCATGATAATTTGTAACAGATTAATCATTTGAT
	M00842:287:000000000-BGGT4:1:1101:22060:8834	1	94	18	9	1	AG	AGAGAGAGAGAGAGAGAG	NA	1	1	4	39	190	TTCAGCAGAGACCCTTCGACAGTCAAGTCAATAGGAGTAGCAACAAACAGTaaaaaaTAagagagagagagagagagATGTGGaaaaaGCTGAGAAGTTCCCCTCAGTGAAGTCCATCCCCTCGTTTCACCAGAATATAGGACTTTGATTTGACCCAATCTCTTTTATTTTGTCTTGAGGAGCTCTTCTT	TTCAGCAGAGACCCTTCGAC	AAGAAGAGCTCCTCAAGACAAA	39	91	35	20	224	22	59.396	57.304	4.2	2.83	5.30005	F	228	GTGACCCTGCATACAAGTCCTCAACatatatAGTTTCAGCAGAGACCCTTCGACAGTCAAGTCAATAGGAGTAGCAACAAACAGTaaaaaaTAagagagagagagagagagATGTGGaaaaaGCTGAGAAGTTCCCCTCAGTGAAGTCCATCCCCTCGTTTCACCAGAATATAGGACTTTGATTTGACCCAATCTCTTTTATTTTGTCTTGAGGAGCTCTTCTTTATG
	M00842:287:000000000-BGGT4:1:1101:22229:7450	1	127	15	5	1	AAT	TATTATTATTATTAT	NA	1	1	5	49	215	TGAACCTTGTTAATGTCATTTGGAATATGAATGTTTGTTACTGTTATTTTCACATTGTTTGTCTTTATTCAACAtattattattattatTTTAATTTATAATATAAATATCTATTATCTTTTGTATTAAATAATTATCTTTTAGATATGGATGCTTCTTTAAGTCAAAGAAGGAACTAAGGGAAGAAGCATCAATGGAATGCAGAGGAAGATGCT	TGAACCTTGTTAATGTCATTTGGAA	AGCATCTTCCTCTGCATTCCA	49	105	53	25	267	21	57.647	59.437	3.53	3.53	8.91636	A	353	tttttATAtttttGAGTCTTTCTTTAATATGAATCTTCTTGTAAATTTAATATGAACCTTGTTAATGTCATTTGGAATATGAATGTTTGTTACTGTTATTTTCACATTGTTTGTCTTTATTCAACAtattattattattatTTTAATTTATAATATAAATATCTATTATCTTTTGTATTAAATAATTATCTTTTAGATATGGATGCTTCTTTAAGTCAAAGAAGGAACTAAGGGAAGAAGCATCAATGGAATGCAGAGGAAGATGCTATACTAATTGGATGTCTACTCGATTTGAAGAATGATCCTATGTGGAGGGGAGAAGGGGATAATTTTAAGGCTGGGtttttACTTCA
	M00842:287:000000000-BGGT4:1:1101:24223:12642	1	39	15	5	1	AAG	AGAAGAAGAAGAAGA	NA	1	1	15	11	290	AGAGGAAGTAATAGAAGCAGAAGATGAAGCAGAAGTagaagaagaagaagaCAAAGCATGTTAAGCAATAGAAGGGGAAGATGAAGCAGAAGGAGAAAATGAAGTGGAAGAAGGAGAAGTagaagaagaGGAGGATgaagaagaagaaGTAGAAGaaaaaGAAGCAAAAGGAGAAGATGCCATAGTTGAAGCAACAGATGAAGTAGAAAGATaagaagaagTATAACGAGAAGGCGAAGTAGCCAAAGCAACaaaaaTAGACAAAGTAACAAGAGCAGAAGATGAAGGaa	AGAGGAAGTAATAGAAGCAGAAGAT	TTCCTTCATCTTCTGCTCTTGTT	11	216	3	25	292	23	57.087	58.022	2.4	2.83	12.8909	F	441	GTAGAGGAAGTAATAGAAGCAGAAGATGAAGCAGAAGTagaagaagaagaagaCAAAGCATGTTAAGCAATAGAAGGGGAAGATGAAGCAGAAGGAGAAAATGAAGTGGAAGAAGGAGAAGTagaagaagaGGAGGATgaagaagaagaaGTAGAAGaaaaaGAAGCAAAAGGAGAAGATGCCATAGTTGAAGCAACAGATGAAGTAGAAAGATaagaagaagTATAACGAGAAGGCGAAGTAGCCAAAGCAACaaaaaTAGACAAAGTAACAAGAGCAGAAGATGAAGGaaaaaCAGAAAATGAAGGAGATGAGGCTGATCAAGCAATAGAAGGAGAAAATGAAGCAGAAGGAGAAGAGGCAGAAGATGAAGTAGAAGATAAAGTAGTTGAAGCAACA…
	M00842:287:000000000-BGGT4:1:1101:24925:10100	1	58	27	9	1.5	AG	CTCTCTCTCTCTCTCTCTTTGTGTGTG	NA	1	1	4	32	171	TGTTGGGAGCTTGAATTTGGTGTTTTCTTATAATCATATGATCAATATTTCGTGctctctctctctctctctTtgtgtgtgAATCCTAGCTTTGTATGGTTTAtttttCATTAGCAAGAAAAGAAAGAAAATAAGGTAAAACTAGGCAAGCGAGTGCTTGGGTTGCTTGTG	TGTTGGGAGCTTGAATTTGGTG	CACAAGCAACCCAAGCACTC	32	70	4	22	174	20	59.635	59.969	4.17	3.51	2.39615	F	192	AATTGTTGGGAGCTTGAATTTGGTGTTTTCTTATAATCATATGATCAATATTTCGTGctctctctctctctctctTtgtgtgtgAATCCTAGCTTTGTATGGTTTAtttttCATTAGCAAGAAAAGAAAGAAAATAAGGTAAAACTAGGCAAGCGAGTGCTTGGGTTGCTTGTGTTTGGGACTAGTTTCAAA
	M00842:287:000000000-BGGT4:1:1101:25306:11065	1	57	22	11	1	AG	CTCTCTCTCTCTCTCTCTCTCT	NA	1	1	7	18	128	AACTCAAAGGAAGATCGGCAAAATAGAGATCTTTTCCCctctctctctctctctctctctTGATGTGGGTGATTGGAGAGGATGGTCTCCTCTTATAGAGGAGATCCTAGGGCAGCATCGAAGTTTGA	AACTCAAAGGAAGATCGGCA	TCAAACTTCGATGCTGCCCT	18	48	19	20	146	20	57.141	59.963	5.69	5.19	2.8959	A	295	AGATCGGAAGAGCGGCAAAACTCAAAGGAAGATCGGCAAAATAGAGATCTTTTCCCctctctctctctctctctctctTGATGTGGGTGATTGGAGAGGATGGTCTCCTCTTATAGAGGAGATCCTAGGGCAGCATCGAAGTTTGACGCGCCCTAAGCCTCAATCTCATCAGAGAATAGGGGAGGAAGAAGACTCTAATCATTCTCCCCTATTTCCCACGCGCAGGGTTACACATAGTTTAGTCCAGGCCGGCCTTAACTTGGACCGGCCCAATTAACTGGGCCTcacacaCCTT
	M00842:287:000000000-BGGT4:1:1101:25350:8974	1	83	14	7	1	AT	ATATATATATATAT	NA	1	1	5	15	122	AGATCCCTAACAACAGTGCCAAAATTTTGATCGCTATCGTAGGTAGTCaaaaaTAAACTCAACTCAAAatatatatatatatAGATAGGGTGAGTCGGGGTCAAATCTATAAGGATCTTGGG	AGATCCCTAACAACAGTGCCA	CCCAAGATCCTTATAGATTTGACCC	47	15	15	21	136	25	59.015	58.758	4.92	4.46	8.2268	F	167	TAATAATTGCACCAAGATCCCTAACAACAGTGCCAAAATTTTGATCGCTATCGTAGGTAGTCaaaaaTAAACTCAACTCAAAatatatatatatatAGATAGGGTGAGTCGGGGTCAAATCTATAAGGATCTTGGGTAATTGGTTAGAAAGTAAAATAAATATTGAT
	M00842:287:000000000-BGGT4:1:1101:26127:12969	1	94	10	5	1	AT	TATATATATA	NA	1	1	2	70	192	TGGACCTAGGAGAAGCCAAAGAACGATGACTCTGGCTAGAAAACATGATCTCTGTGAGTACAAAATAATCTTCTAGCTATTCACCTTTCAGCtatatatataATCAGTTCTAATGGCTAAGATTGACATTAGTTTGGGTGAACAGGCTATAGAtctctcTATGTGTCATGAATCAGAGATGAGCAAGCGAGC	TGGACCTAGGAGAAGCCAAAG	GCTCGCTTGCTCATCTCTGA	71	70	2	21	193	20	59.091	60.179	2.77	3.27	2.08842	B	220	ATGGACCTAGGAGAAGCCAAAGAACGATGACTCTGGCTAGAAAACATGATCTCTGTGAGTACAAAATAATCTTCTAGCTATTCACCTTTCAGCtatatatataATCAGTTCTAATGGCTAAGATTGACATTAGTTTGGGTGAACAGGCTATAGAtctctcTATGTGTCATGAATCAGAGATGAGCAAGCGAGCGACTGTTCcacacaGACATCCTTGATT
	M00842:287:000000000-BGGT4:1:1101:27246:17096	1	70	15	5	1	AAG	CTTCTTCTTCTTCTT	NA	1	1	9	24	137	TGCTCCAACTTCATCTTCAACACCTTCTATTTCATCTTCTACTTCTCcttcttcttcttcttCCTCTTTATCTTCAACTTCtttttCTTTAACTTCTACTTATGTTCAGTTCTAGCTTTGTTAGTACCAAAGAAGGA	TGCTCCAACTTCATCTTCAACAC	TCCTTCTTTGGTACTAACAAAGCT	24	51	23	23	159	24	59.435	58.063	3.32	3.74	9.50259	F	293	AGATCGGAAGAGCGACTTTTGTTGCTCCAACTTCATCTTCAACACCTTCTATTTCATCTTCTACTTCTCcttcttcttcttcttCCTCTTTATCTTCAACTTCtttttCTTTAACTTCTACTTATGTTCAGTTCTAGCTTTGTTAGTACCAAAGAAGGATGAAACTATGAGAAtgtgtgtgGATAATAGAGCCATCAACAAAATCACCATCAAGTATCGCTcccccATTCCTTGTTTGGATGATATGCTTGATGAACTCCATGGCTCCAAGGTGtttttCAAAATTGATCTCA
	M00842:287:000000000-BGGT4:1:1101:27763:20779	1	88	51	10	2	AG	CTCTCTCTCTCTCTCTCGGTTTCTACTGCTACTCTCTCTCTCTCTCTCTCT	NA	1	1	3	29	190	CGGCTCAACAGTAGCACCTATTTGGACCATGCAAGGGAGAAGTGAGAgggggAGTGAGAGGGAGAGGGCAGTAGGTTTCTACTGCTActctctctctctctctCGGTTTCTACTGCTActctctctctctctctctctTTCTTTCTCAGtttttCTTccccccTccccccGTCATCAACCGTATTCTACT	CGGCTCAACAGTAGCACCTA	AGTAGAATACGGTTGATGACGGG	67	29	1	20	190	23	59.469	59.932	3.08	5.28	3.59849	G	190	CGGCTCAACAGTAGCACCTATTTGGACCATGCAAGGGAGAAGTGAGAgggggAGTGAGAGGGAGAGGGCAGTAGGTTTCTACTGCTActctctctctctctctCGGTTTCTACTGCTActctctctctctctctctctTTCTTTCTCAGtttttCTTccccccTccccccGTCATCAACCGTATTCTACT
	M00842:287:000000000-BGGT4:1:1101:28499:18949	1	59	18	9	1	AT	ATATATATATATATATAT	NA	1	1	3	26	253	ttCTGCTTCTTATGGACTGCTTATCCACTAAGCTAGTTAATGGTGACatatatatatatatatatTTTGTTAgggggTGATGTTTAACAATAATGTTAATGGCAACTATGATATCAATGCCATTATATGATATCAATATTACTAAtttttATATTGCTTATTTCCCTTTATATCTTATTCCATAGTAGGGATAAAATACTTGCATTCTTAATGCTGTGAAACACAATTAAATTCCTGTAATCTGCTGCCTTCG	TTCTGCTTCTTATGGACTGCT	CGAAGGCAGCAGATTACAGGA	26	167	12	21	264	21	57.011	60.135	4.24	3.86	5.12368	F	265	GTTGCTGttttttCTGCTTCTTATGGACTGCTTATCCACTAAGCTAGTTAATGGTGACatatatatatatatatatTTTGTTAgggggTGATGTTTAACAATAATGTTAATGGCAACTATGATATCAATGCCATTATATGATATCAATATTACTAAtttttATATTGCTTATTTCCCTTTATATCTTATTCCATAGTAGGGATAAAATACTTGCATTCTTAATGCTGTGAAACACAATTAAATTCCTGTAATCTGCTGCCTTCGA
	M00842:287:000000000-BGGT4:1:1101:3321:13504	1	76	27	8	1.5	AG	AGAGAGAGAGAGAGAGGGAGAGAGAGA	NA	1	1	6	25	142	AGTCTATGGGCTTTACGGGCCGGCAGGCATATGAGTCTAGAACAAagagagagagagagagGgagagagagaTAGAGAAAGAGGgagagagaTCAGATGAgaggaggaggagGGAGAATTCTGGGAAGAAATAGCGAGAGGG	AGTCTATGGGCTTTACGGGC	CCCTCTCGCTATTTCTTCCCAG	25	48	31	20	172	22	59.531	60.224	6.13	4.45	2.69281	B	178	GTGTGGAAGACGATAAGGGGCAATGCACAGAGTCTATGGGCTTTACGGGCCGGCAGGCATATGAGTCTAGAACAAagagagagagagagagGgagagagagaTAGAGAAAGAGGgagagagaTCAGATGAgaggaggaggagGGAGAATTCTGGGAAGAAATAGCGAGAGGGGAGGAG
	M00842:287:000000000-BGGT4:1:1101:3474:17864	1	163	22	11	1	AG	AGAGAGAGAGAGAGAGAGAGAG	NA	1	1	2	36	157	CCCAACACCCTTCCTCCTTGTACATATCTTCTATTGCTCTTTTAGGTTGGCATATGGCCTCCCATTTCCATCAAagagagagagagagagagagagCACTATAAGAAATAGTTCCATTATTGATGCTAATTTTGGCATTTGTGGATGATAACTACTG	CCCAACACCCTTCCTCCTTG	CAGTAGTTATCATCCACAAATGCCA	54	36	89	20	245	25	60.251	59.41	3.61	4.92	5.8412	A	265	GaaaaaCTTGAAAGAAAAGAAATGCTAGAATATTTATCGGATGGAATTCCTCAATTTATGTTGTTCTATAGAAGACACTGCACACTTTCCCAACACCCTTCCTCCTTGTACATATCTTCTATTGCTCTTTTAGGTTGGCATATGGCCTCCCATTTCCATCAAagagagagagagagagagagagCACTATAAGAAATAGTTCCATTATTGATGCTAATTTTGGCATTTGTGGATGATAACTACTGACACTTTCAAAAGCGTCACA
	M00842:287:000000000-BGGT4:1:1101:5175:6126	1	183	26	5	1.5	AG	AGAGAGGGAGAGAGAAAGAGAGAGAG	NA	1	1	8	2	134	TCCACCACAGTCCCTTCTGAGGACACATCTGGTAATGACTCATGACTATTCACAGTTGCCATCCAagagagTAGAagagagGAAGAagagagGgagagagaAagagagagagAAACCAAGCCTCTCCctctctT	TCCACCACAGTCCCTTCTGA	AAGAGAGGGAGAGGCTTGGT	66	2	97	20	230	20	60.105	59.882	3.27	3.67	0.223338	F	231	TACGTGATCACTGGTCCACAGTGAGAGCAGGGAGAGTAGACGCagagagagGGAGGAAGGGGTCTCTTCCTTCCTCTGTCTGGCAcccccTACATCTCCACCACAGTCCCTTCTGAGGACACATCTGGTAATGACTCATGACTATTCACAGTTGCCATCCAagagagTAGAagagagGAAGAagagagGgagagagaAagagagagagAAACCAAGCCTCTCCctctctTT
	M00842:287:000000000-BGGT4:1:1101:5502:20479	1	133	10	5	1	AT	TATATATATA	NA	1	1	2	8	142	CTGTACGCAtgtgtgGCTTGGAGAGCCTCATTCTACCAtttttAGTAGCAACGAGCATCACCTCGAGCAAGAAAAGGTAAGTGTTTTGAACTCTTACAATtatatatataATCTACAGTGAAAGGTGAATAACTTGCATCGA	CTGTACGCATGTGTGGCTTG	TCGATGCAAGTTATTCACCTTTCA	80	8	33	20	174	24	59.833	58.999	4.01	2.69	5.16719	F	182	GCAAGAGCCCCGGTGTGGATTACCTGTAGAGGCTGTACGCAtgtgtgGCTTGGAGAGCCTCATTCTACCAtttttAGTAGCAACGAGCATCACCTCGAGCAAGAAAAGGTAAGTGTTTTGAACTCTTACAATtatatatataATCTACAGTGAAAGGTGAATAACTTGCATCGAAAAGTTCT
	M00842:287:000000000-BGGT4:1:1101:6009:18077	1	47	10	5	1	AC	TGTGTGTGTG	NA	1	1	2	27	246	GAAACGTGGTGAGCGTCCACCCAAGGCACCTCAAGCCGAGCAGTTTtgtgtgtgtgAGGTATTTCTTAGAGTTTAAGCAGGCGGCCACAAAAGTCTAGTAAGAGGTAAAATGACGTATACTATAACAGCAAAGAATCTTTGGAAGTTGCTTGTCAGATTTTATTGCGAAGTTCATCTGCTAGTCAGATATTTTATAGATTTTCTTGTTGAATTTGCTCTCACTAGATCTTCCTACGTACAGTCGGT	GAAACGTGGTGAGCGTCCA	ACCGACTGTACGTAGGAAGA	27	170	1	19	246	20	60.593	57.52	4.02	2.87	4.07278	A	266	GAAACGTGGTGAGCGTCCACCCAAGGCACCTCAAGCCGAGCAGTTTtgtgtgtgtgAGGTATTTCTTAGAGTTTAAGCAGGCGGCCACAAAAGTCTAGTAAGAGGTAAAATGACGTATACTATAACAGCAAAGAATCTTTGGAAGTTGCTTGTCAGATTTTATTGCGAAGTTCATCTGCTAGTCAGATATTTTATAGATTTTCTTGTTGAATTTGCTCTCACTAGATCTTCCTACGTACAGTCGGTTCAAGaaaaaTACCATAATT
	M00842:287:000000000-BGGT4:1:1101:6288:10679	1	137	24	12	1	AC	TGTGTGTGTGTGTGTGTGTGTGTG	NA	1	1	2	65	227	gCACCAAAGACCTCTGCAGTTTGGTTCATGCCATAGGCTACTCTGGATGATCGATTCTTGCATGAGCATTGGTAGGTGGTAAGACTAGGTTTAATGTTGAATtatataACCAAAGAATtgtgtgtgtgtgtgtgtgtgtgtgTTGGGAAAATGCCACATGTTGCATCCAACGGCTAAAGaaaaaaGGGGACATGCGGCATGTGTCATGCTCTgagagaAGCTGGACT	GCACCAAAGACCTCTGCAGT	AGTCCAGCTTCTCTCAGAGC	98	65	19	20	245	20	60.536	58.815	4.4	4.09	1.72132	F	384	GCTTCATGACTGGAgggggCACCAAAGACCTCTGCAGTTTGGTTCATGCCATAGGCTACTCTGGATGATCGATTCTTGCATGAGCATTGGTAGGTGGTAAGACTAGGTTTAATGTTGAATtatataACCAAAGAATtgtgtgtgtgtgtgtgtgtgtgtgTTGGGAAAATGCCACATGTTGCATCCAACGGCTAAAGaaaaaaGGGGACATGCGGCATGTGTCATGCTCTgagagaAGCTGGACTTCACCTTTAATGTTACAGTATAGATTTTAGTTAATTTCTGACCATCATCTTCTCATAAGCATAATaaaaaGACTGAAACAGATTTACTTTCTACCATGGTCGTCCAAGCCCAGCTCAACTACTGGTTATCATAAATTCT
	M00842:287:000000000-BGGT4:1:1101:7106:10549	1	189	10	5	1	AT	ATATATATAT	NA	1	1	2	43	195	ACAAGCATGCCTTTAGTTAGGGGATCTACAAGCATGAGCTCTGAAGGTAAATACATAATGTAAATCTCATGATCATGAGCCTTCtttttAACAAatatatatTTTATATCAAAGTGCTTCatatatatatAGATGTTTTGAAACTTTGAAAGTAGGTCACAGCACCAGTATTATCACAATACAAAGTCACACGCC	ACAAGCATGCCTTTAGTTAGGG	GGCGTGTGACTTTGTATTGTGA	98	43	69	22	263	22	58.644	59.454	3.53	3.58	5.90266	F	298	CCTACTAAACTAAGGCATCAAAAGATCCTACTATTTCtatataGGTTACATAATCTTTGAACACTTTAACAAGCATGCCTTTAGTTAGGGGATCTACAAGCATGAGCTCTGAAGGTAAATACATAATGTAAATCTCATGATCATGAGCCTTCtttttAACAAatatatatTTTATATCAAAGTGCTTCatatatatatAGATGTTTTGAAACTTTGAAAGTAGGTCACAGCACCAGTATTATCACAATACAAAGTCACACGCCTaaaaaTGctctctAGAATATTAAATCTAGAAATC
	M00842:287:000000000-BGGT4:1:1101:7313:15361	1	99	10	5	1	AT	ATATATATAT	NA	1	1	2	39	152	TGCATATTACAAAGGTCGCACTATAAATATTGTTGAAATGCATGGAATTGATTGGCAGATCatatatatatAGTTGTAGGACTAGTCATTTCACAATCATTTGAATTGAAGTTCATAGATGTTCAAGCATGTAGCCTGACCTGATGAAACCA	TGCATATTACAAAGGTCGCACT	TGGTTTCATCAGGTCAGGCT	39	61	38	22	189	20	58.394	58.933	4.4	4.58	4.67293	A	246	GATAATGGAGTTTTACGTATTGTAAATGGTGTGGATTTGCATATTACAAAGGTCGCACTATAAATATTGTTGAAATGCATGGAATTGATTGGCAGATCatatatatatAGTTGTAGGACTAGTCATTTCACAATCATTTGAATTGAAGTTCATAGATGTTCAAGCATGTAGCCTGACCTGATGAAACCAATTCTCAGTCATGAATCTCTTTGTaaaaaaTCTTTATAGGAATAGTTGGTATCTATT
	M00842:287:000000000-BGGT4:1:1101:7498:10348	1	197	20	10	1	AT	TATATATATATATATATATA	NA	1	1	5	57	290	CGCGAAGTTATCAGATTTCATGGTAAATAGTGGCAAAATAATTGAATAATAAAATATGAGAAGAGCAAGCATGATAACAACTaaaaaaaTATTTAGAGTATGATAGGGTGGTGCAACaaaaaaaaaTAAATAATAAAATATGAGTGGAGCAAACATGATATAGTAAAGTATGATATgagagaAAAAGTATGtatatatatatatatatataTTAGAGTGTGATATGGCGGTGCCGAACTAATAACATATGAGAGTAGCAAACATGATATCATAGGGTGTGCAGAGTTCAT	CGCGAAGTTATCAGATTTCATGGT	ATGAACTCTGCACACCCTATGA	167	57	6	24	295	22	59.729	59.16	3.55	2.15	7.11109	F	342	TACATCGCGAAGTTATCAGATTTCATGGTAAATAGTGGCAAAATAATTGAATAATAAAATATGAGAAGAGCAAGCATGATAACAACTaaaaaaaTATTTAGAGTATGATAGGGTGGTGCAACaaaaaaaaaTAAATAATAAAATATGAGTGGAGCAAACATGATATAGTAAAGTATGATATgagagaAAAAGTATGtatatatatatatatatataTTAGAGTGTGATATGGCGGTGCCGAACTAATAACATATGAGAGTAGCAAACATGATATCATAGGGTGTGCAGAGTTCATAAAAGATACGTGAGAGTGGCTATTATAATTGCTGGATGCAATCCACC
	M00842:287:000000000-BGGT4:1:1101:7598:17819	1	94	10	5	1	AG	CTCTCTCTCT	NA	1	1	4	43	173	gggCATCCACTTCCGCTcccccccccccccccccTCTggggggTCAGCCGACCAAACCAACctctctctctCCTTTCAGACAACCAACCAGAActctctTTcccccTCTCAGGCTAAaccaccacctctctcCTCTTTTCCCCTAtttttCAATTTAGCCTGTCATCTCTTCt	GGGCATCCACTTCCGCTC	AGAAGAGATGACAGGCTAAATTGA	43	78	33	18	205	24	60.515	57.695	5.03	2.57	8.8201	F	212	CCAAAAGAATTAATCTCCCTCTCCCCTCTggggggCATCCACTTCCGCTcccccccccccccccccTCTggggggTCAGCCGACCAAACCAACctctctctctCCTTTCAGACAACCAACCAGAActctctTTcccccTCTCAGGCTAAaccaccacctctctcCTCTTTTCCCCTAtttttCAATTTAGCCTGTCATCTCTTCtttttATT
	M00842:287:000000000-BGGT4:1:1101:8519:9036	1	176	20	5	1	AAAC	CAAACAAACAAACAAACAAA	NA	1	1	3	18	157	AACATGCCACCAAGACCACTCCGATCAAAACAAAGGCGcaaacaaacaaacaaacaaaTCAAACATCAACACAAATACCCAAAATTAGATCaagaagaagGGaaaaagagagaGGGTGAGGAGAGGAGCAtctctcACATGGTAGGAGCATCGGAGG	AACATGCCACCAAGACCACT	CCTCCGATGCTCCTACCATG	18	79	138	20	294	20	59.814	59.68	4	3.66	0.505628	F	396	AATAAAACAAGACAACCTTCAGATGTTCCAGaaaaaTTCAAtttttCACAAATATTTCGATCTCCCCAATCCCAGTCCATTCCGCTCAACCCaaaaaCAAAACTTCATACATTCGATCAGAACAAAGCAGAAAACAGAACATGCCACCAAGACCACTCCGATCAAAACAAAGGCGcaaacaaacaaacaaacaaaTCAAACATCAACACAAATACCCAAAATTAGATCaagaagaagGGaaaaagagagaGGGTGAGGAGAGGAGCAtctctcACATGGTAGGAGCATCGGAGGGAACCGCGGCGAGAGCGGCGTCCTTCTCCGAGGAGGCCATGCGAGAACCGggaggaggaGTGGGAAAGGGCGAGGGGAGGAAGTGAGAGCTCAAAACCCGAA
	M00842:287:000000000-BGGT4:1:1101:8705:16127	1	272	22	11	1	AG	AGAGAGAGAGAGAGAGAGAGAG	NA	1	1	3	54	188	GTCTACCACATCCAGCCACCGACCATGTCCTCAGGCACGATCCCCAACGATCCCTACCTCCCCTTCTTCCTCCAagagagagagagagagagagagAACAAAAGTTAAACTtctctcctctctCCTATTActctctATTCTTTCTCTTTCTTCTcccccTTtctctctcTAAGCAAATCTAGGGATCC	GTCTACCACATCCAGCCACC	GGATCCCTAGATTTGCTTAGAGAGA	54	67	198	20	385	25	60.108	59.222	4.61	3.1	5.88539	F	416	CtttttCCAACCATCAGTGATGCCGCCTCTAGATGCCAGGCCACTAGTCGAGTCCCCTAGCCTCCCATCGACCCTTTCCAATGGAGCCATGACCACCAATGAGTGGCCAACAGCCaaaaaTGAGGAATAGCACCAATTCTCCTAtttttCTGGGCTCTTTCCTCTGAtttttCACGGGCCAATCACCACTAATGGCTGTCTACCACATCCAGCCACCGACCATGTCCTCAGGCACGATCCCCAACGATCCCTACCTCCCCTTCTTCCTCCAagagagagagagagagagagagAACAAAAGTTAAACTtctctcctctctCCTATTActctctATTCTTTCTCTTTCTTCTcccccTTtctctctcTAAGCAAATCTAGGGATCCTAGTTCAAAACCCT…
	M00842:287:000000000-BGGT4:1:1101:8740:16820	1	227	12	6	1	AC	ACACACACACAC	NA	1	1	3	44	172	TACAGTCGGGTGTCACAAGCCCCATATGTTTGGGTCACAAGGTATGACAGAATGTTCAGCCCAAAATTCACAGAAACAAcccccccGcccccccAacacacacacacAGaaaaaaaaaaGAAGaaaagaaaaagaaaaagaGTAGACTTTAAGCTAGGCCAATTCATACTCC	TACAGTCGGGTGTCACAAGC	GGAGTATGAATTGGCCTAGCT	75	44	132	20	303	21	59.967	57.221	4.01	3.32	3.81191	F	320	AACATATTTGTGTAGATATAGATGATCACTTTTGGGGACATAAatatatatACTTGTTTATTATAAATTGCTAAATAGGGACAAGTTTTCCACTAAGGCTTTGTGCGAGTTGTAGGCAGATCCATGATTCATACAGTCGGGTGTCACAAGCCCCATATGTTTGGGTCACAAGGTATGACAGAATGTTCAGCCCAAAATTCACAGAAACAAcccccccGcccccccAacacacacacacAGaaaaaaaaaaGAAGaaaagaaaaagaaaaagaGTAGACTTTAAGCTAGGCCAATTCATACTCCTAATGATATGGACAGGA
	M00842:287:000000000-BGGT4:1:1101:9056:15651	1	142	18	9	1	AT	TATATATATATATATATA	NA	1	1	3	67	245	TCCCAACAACCTCTACTTGCAAAGAGTAATGAGCTACATTACATTGTTACTCTATTTTGCATTAAGTAAATATCttattattaATAGGAAGGACaaaaaaGtatataCGATATAATTCAGTGAAGACtgtgtgtgTACATtatatatatatatatataCACTTATGCTAAACTTCTCTGATGCTTATGTTGAACTTGGGACTAGAAATTAAGGCCTGGAAGAtttttGGGCTAGCTTGGACTTGA	TCCCAACAACCTCTACTTGCA	TCAAGTCCAAGCTAGCCCAA	119	67	2	21	246	20	59.228	58.936	4.08	4.12	2.83586	F	374	CTCCCAACAACCTCTACTTGCAAAGAGTAATGAGCTACATTACATTGTTACTCTATTTTGCATTAAGTAAATATCttattattaATAGGAAGGACaaaaaaGtatataCGATATAATTCAGTGAAGACtgtgtgtgTACATtatatatatatatatataCACTTATGCTAAACTTCTCTGATGCTTATGTTGAACTTGGGACTAGAAATTAAGGCCTGGAAGAtttttGGGCTAGCTTGGACTTGAAATTTCATGGTCTGTGTCCAAATGCTAAACTTATTTCTACCCTCTACAAAACCCTATAAATAGCCCTAATAGTCTTCATGCTGAAAATAGTACTAACTATGGtatataAGTATCATTGTTtatataAA
	M00842:287:000000000-BGGT4:1:1101:9056:17333	1	272	33	9	2	AG	AGAGAGAGAGAGAGAGAGGGGGGGAGAGAGAGA	NA	1	1	4	38	153	CTTTGAGTGGTGGAGTGGGTATAGGGTAGAAGGTGGAGATTTAGCCCTTCCCAATCTCagagagagagagagagagggggggagagagagaAAGAATGaaaaaaaGAGCGTGCTATTGATAAAATCTTATGGCTCAAGGTCTAATTAGGTACA	CTTTGAGTGGTGGAGTGGGT	TGTACCTAATTAGACCTTGAGCCA	38	38	214	20	366	24	59.526	58.973	4.51	4.75	5.50164	G	415	TGGTTTCCATGCCAAATGGTGCTTGAATTCTTGGATAAGTAGTGTTCTCTTATTGGGCTGATCTCTTGAACatatatAGCTGACATTCCATTGATGGGTTTTAAAATCGAAATATGCAAATTAAGTCGATGGAAAGAATGCCAATGTGATGATTTCTTGAATGTGCTCGGATGGTCCCTTCTCCATTTGGGAAAAGGGGTGGGGTTTAAGTCTCTTTGAGTGGTGGAGTGGGTATAGGGTAGAAGGTGGAGATTTAGCCCTTCCCAATCTCagagagagagagagagagggggggagagagagaAAGAATGaaaaaaaGAGCGTGCTATTGATAAAATCTTATGGCTCAAGGTCTAATTAGGTACAAAATTCAAATATGCCCATGTTATCATTTTAGCC…
	M00842:287:000000000-BGGT4:1:1101:9153:16061	1	36	10	5	1	AG	CTCTCTCTCT	NA	1	1	2	2	90	TTGGTTGTTTGACATTTGTTGCTAActctctctctAGATTTCAGTTTGTACCAAACAATTGCATTAGCTGGAAACATGTTGTAAGTGGAA	TTGGTTGTTTGACATTTGTTGCT	TTCCACTTACAACATGTTTCCAGC	2	31	11	23	100	24	58.426	59.963	3.91	4.85	8.61135	A	149	TCTTCAACTATTGGTTGTTTGACATTTGTTGCTAActctctctctAGATTTCAGTTTGTACCAAACAATTGCATTAGCTGGAAACATGTTGTAAGTGGAAGAAGAGATCATTCTATGCCAGTGTAGTAATTCTAAACTCCTGATGCTAC
	M00842:287:000000000-BGGT4:1:1101:9360:12573	1	81	10	5	1	AG	CTCTCTCTCT	NA	1	1	4	47	292	TTGAAACCATAATATGAAAGGAGCAAGAAggggggAGGTCCTCCAcccccccccccccccccccccccccccctctctctctcccccTTGGTGTGATGATACAGTTGCCTCCCCGATGTGTTGGGAAGGGATTGAGTCCGAGAAAGGGCATGTTGGCCCAGTAGAATTAGGAGGCGCAATGCGCCAAAGAGGGCATGTTGGCCCAATAAGACTAGGAGGCCCAACGGGTTGAGAAGGACTATGGGCCTAGTGAGGCTAGAGGCCCATTAAGGGCCCACAACGGACCTAAGAA	TTGAAACCATAATATGAAAGGAGCA	TTCTTAGGTCCGTTGTGGGC	47	190	9	25	300	20	57.047	59.964	4.26	5.36	7.98874	F	305	GATGAGTTTTGAAACCATAATATGAAAGGAGCAAGAAggggggAGGTCCTCCAcccccccccccccccccccccccccccctctctctctcccccTTGGTGTGATGATACAGTTGCCTCCCCGATGTGTTGGGAAGGGATTGAGTCCGAGAAAGGGCATGTTGGCCCAGTAGAATTAGGAGGCGCAATGCGCCAAAGAGGGCATGTTGGCCCAATAAGACTAGGAGGCCCAACGGGTTGAGAAGGACTATGGGCCTAGTGAGGCTAGAGGCCCATTAAGGGCCCACAACGGACCTAAGAAATGAA
	M00842:287:000000000-BGGT4:1:1101:9597:2748	1	41	34	11	1.5	AG	CTCTCTCTCTCTCTCTCTCTCTATCTATCTATCT	NA	1	1	2	4	94	ccaccTCTCACTGCACAGTTCCCTTAACCCTCTTCGctctctctctctctctctctctatctatctatctCTTTCTCCTCCTTCCGCATGCTAC	CCACCTCTCACTGCACAGTT	GTAGCATGCGGAAGGAGGAG	16	4	5	20	98	20	59.893	60.25	3.16	3.69	0.357113	F	144	accaccaccTCTCACTGCACAGTTCCCTTAACCCTCTTCGctctctctctctctctctctctatctatctatctCTTTCTCCTCCTTCCGCATGCTACCAACCCCTcccccTCATGTTTCCACCCTCAGCCCTCTCACCTTTAT
	M00842:287:000000000-BGGT4:1:1101:9799:8868	1	197	18	9	1	AG	TCTCTCTCTCTCTCTCTC	NA	1	1	3	49	260	TGATGATATGGCACTTTGACAGtttttttGTGTATAGGTAGTaaaaaCAGGCTTATTATGCCAGGAAACCTAAGCTATTGTCCCAATTTCCACTCTACACCCAGTGAATCCATGAAGCAACAGTCGTTCCCCTTCAATTTTCATCCaaaaaCTATGAACCATTCAGAGtctctctctctctctctcATATGAGGGCGGGTAGGACAGCAAGCACAGAGTTTAAGTCATATTTcccccAGTTTACAACCTTCTTTAAAGCC	TGATGATATGGCACTTTGACAGT	GGCTTTAAAGAAGGTTGTAAACTGG	145	49	29	23	288	25	58.153	58.786	3.55	4	11.0609	F	289	AATCAAATATTTCTATTGGCCTATCTTTTGATGATATGGCACTTTGACAGtttttttGTGTATAGGTAGTaaaaaCAGGCTTATTATGCCAGGAAACCTAAGCTATTGTCCCAATTTCCACTCTACACCCAGTGAATCCATGAAGCAACAGTCGTTCCCCTTCAATTTTCATCCaaaaaCTATGAACCATTCAGAGtctctctctctctctctcATATGAGGGCGGGTAGGACAGCAAGCACAGAGTTTAAGTCATATTTcccccAGTTTACAACCTTCTTTAAAGCCA
	M00842:287:000000000-BGGT4:1:1102:11182:20721	1	181	10	5	1	AT	TATATATATA	NA	1	1	4	104	292	ACTTCAACTGATCTGGGTCGTTGATACTGAACAATTGCCGACTCAGGTATCATTGATGTCTGACACATGTAGAGATCCATACAGTGTCAATCAAATTGACTCCAACTTTGTCCATTGGAGTCGAGtatatatataGGTCTAAGAGGAgggggTTGAGGATTATTCCTCCTTCCTTCTTCCTACtttttGCTTCCAGTGACCTCTTGCAGAGACCATGTTCTATGTGTAAGGTCTTCTTCCACCTTTCTTTAGGTCTTCCAGGTCTATCATTGGCTCCTTTGCATCTACTTGA	ACTTCAACTGATCTGGGTCGT	TCAAGTAGATGCAAAGGAGCCA	104	135	56	21	347	22	59.029	59.694	4.34	4.75	4.27699	F	441	AGACAACTGCAGGCATTATGGTGATCGCTGTCAATGGAGTTGTTGGGATTTGGTCACTTCAACTGATCTGGGTCGTTGATACTGAACAATTGCCGACTCAGGTATCATTGATGTCTGACACATGTAGAGATCCATACAGTGTCAATCAAATTGACTCCAACTTTGTCCATTGGAGTCGAGtatatatataGGTCTAAGAGGAgggggTTGAGGATTATTCCTCCTTCCTTCTTCCTACtttttGCTTCCAGTGACCTCTTGCAGAGACCATGTTCTATGTGTAAGGTCTTCTTCCACCTTTCTTTAGGTCTTCCAGGTCTATCATTGGCTCCTTTGCATCTACTTGAGTtatataGTATAGCAAGTTAGGGGTTTACCAGTCTAGGACGATGTGTCTAA…
	M00842:287:000000000-BGGT4:1:1102:11544:2136	1	158	10	5	1	AC	ACACACACAC	NA	1	1	2	63	188	TGCCAGTCGTTCAAGCATTTGATCAATGAATGGTAGGGaaaaaTGATCCTTCCTTGTCACCATATTCAATTTGCGATAATCTATacacacacacCATCCACTTTGAATTCTTGTTGGGACAAGTTTATTATCTTGAtttttAACTACCGTTATTCCAGACtttttAGGCACTACTTGAACTGGACTCA	TGCCAGTCGTTCAAGCATTTG	TGAGTCCAGTTCAAGTAGTGCC	63	72	74	21	261	22	60.001	59.963	2.32	5.01	3.03874	F	303	CTTTCAGTTCAGGTGCAATTACAATTTGATTATAACCGGAATACCCATCTAGAAaataataatGAGACTTACCTGCCAGTCGTTCAAGCATTTGATCAATGAATGGTAGGGaaaaaTGATCCTTCCTTGTCACCATATTCAATTTGCGATAATCTATacacacacacCATCCACTTTGAATTCTTGTTGGGACAAGTTTATTATCTTGAtttttAACTACCGTTATTCCAGACtttttAGGCACTACTTGAACTGGACTCACCCATCTACTATCTGAGATTGGatatatAACCCCTACATCTA
	M00842:287:000000000-BGGT4:1:1102:11745:9275	1	113	16	8	1	AG	GAGAGAGAGAGAGAGA	NA	1	1	2	65	223	CGTGATGTGCCAGCAACATGAAtttttCTGACGAGCCCAATGTTGGGGTTGCATGTATCAGAGGGGAagagagAAGAAGTAAGGGgagagagagagagagaCAAAGTGATATAGAAAGAAGGCCCTTCATGATCACTCCaaaaaCTTCTGGGATGGTTGTGAGGGGTTTTACTTACTCAACTTGGGCTTGGCTCTAATTGGCTAGGCCCAATCCTTGCATTCT	CGTGATGTGCCAGCAACATG	AGAATGCAAGGATTGGGCCT	65	102	28	20	250	20	60.455	59.663	3.21	5.19	0.792891	F	279	ATACAAGATCTTAAGGGCTTACCTCAACGTGATGTGCCAGCAACATGAAtttttCTGACGAGCCCAATGTTGGGGTTGCATGTATCAGAGGGGAagagagAAGAAGTAAGGGgagagagagagagagaCAAAGTGATATAGAAAGAAGGCCCTTCATGATCACTCCaaaaaCTTCTGGGATGGTTGTGAGGGGTTTTACTTACTCAACTTGGGCTTGGCTCTAATTGGCTAGGCCCAATCCTTGCATTCTACCCTCCCAATAAAGAGTTTCGTTCTCAA
	M00842:287:000000000-BGGT4:1:1102:11802:22190	1	104	70	35	1	AC	TGTGTGTGTGTGTGTGTGTGTGTGTGTGTGTGTGTGTGTGTGTGTGTGTGTGTGTGTGTGTGTGTGTGTG	NA	1	1	5	41	212	ACATGGATCCTCAGCTCAGTAACAACaaaaaCAACCATAAAatatattttttATAGTTTTCtgtgtgtgtgtgtgtgtgtgtgtgtgtgtgtgtgtgtgtgtgtgtgtgtgtgtgtgtgtgtgtgtgtgtgTCTCTAACGGCAATTATATTAAGTTGCttttttttATTCAGTAATATTGAATCATTTATCAGATGGATTACAGCATCTAGC	ACATGGATCCTCAGCTCAGT	GCTAGATGCTGTAATCCATCTGA	41	58	43	20	254	23	58.123	57.855	3.41	3.27	7.02154	F	282	ATCTACGTAATGAATAATCCatatatAATTAAACatatatCTACATGGATCCTCAGCTCAGTAACAACaaaaaCAACCATAAAatatattttttATAGTTTTCtgtgtgtgtgtgtgtgtgtgtgtgtgtgtgtgtgtgtgtgtgtgtgtgtgtgtgtgtgtgtgtgtgtgtgTCTCTAACGGCAATTATATTAAGTTGCttttttttATTCAGTAATATTGAATCATTTATCAGATGGATTACAGCATCTAGCTACCTAAAATTTAATCAAATAATTTACC
	M00842:287:000000000-BGGT4:1:1102:12115:6039	1	94	10	5	1	AT	TATATATATA	NA	1	1	4	58	291	GCCTATTTCAAACCatatatAGCCCTATTCAATTAACATATCAAATGTTTCTTACCTTGTGCTATAAAACCATTTGGCTGATCtatatatataTCTTCAAATAAATCTCCATTCAGGAAAGCAGTTTTAATATTTATTTAGTAAAGCTCCAAATCAAAATGAGCCACCAAAGTCAACACAATATGAATAGAGTCTTTAGTAGAGATTGGTGaaaaaaTCTCATTGTAATCAACACCTTGTTGCTGTCTATACCCTTTTGCAACAAGTTTGGCTTTGTGtctctcAACTTGT	GCCTATTTCAAACCATATATAGCCC	ACAAGTTGAGAGACACAAAGCC	58	176	11	25	301	22	57.665	59.054	5.19	4.35	10.2805	F	361	TTGTTTAAAAGCCTATTTCAAACCatatatAGCCCTATTCAATTAACATATCAAATGTTTCTTACCTTGTGCTATAAAACCATTTGGCTGATCtatatatataTCTTCAAATAAATCTCCATTCAGGAAAGCAGTTTTAATATTTATTTAGTAAAGCTCCAAATCAAAATGAGCCACCAAAGTCAACACAATATGAATAGAGTCTTTAGTAGAGATTGGTGaaaaaaTCTCATTGTAATCAACACCTTGTTGCTGTCTATACCCTTTTGCAACAAGTTTGGCTTTGTGtctctcAACTTGTCCTTGAACATCATGCTTAGTCTTTAAAACCTATTTGTACCCAATAGTTTTGTGACCAACA
	M00842:287:000000000-BGGT4:1:1102:12667:16338	1	181	16	8	1	AG	TCTCTCTCTCTCTCTC	NA	1	1	8	24	112	GTCCTCATAGTGTCAGCGCTAAACATGTGCTATTTAAGTAATAAATTATGAAtctctctctctctctcTTTGTCTAATTAAACTTGAGCCAGGCCAAATTTGCACAGGCTGA	GTCCTCATAGTGTCAGCGCT	TCAGCCTGTGCAAATTTGGC	32	24	129	20	240	20	59.542	59.966	5.92	4.52	0.491632	A	240	ATATAATTTCTCTAATCTGGTTTAACTTGAATCCATGTCTTGCTTAAGCTATCTAATTTTATGTACAATGAAAATGCCTGCCCTATAAACTAGACCatatatGTTGCAACATGTAATATTtatataATGTCCTCATAGTGTCAGCGCTAAACATGTGCTATTTAAGTAATAAATTATGAAtctctctctctctctcTTTGTCTAATTAAACTTGAGCCAGGCCAAATTTGCACAGGCTGA
	M00842:287:000000000-BGGT4:1:1102:12953:20677	1	85	20	7	1.5	AG	ACACACAGAGAGAGAGAGAG	NA	1	1	10	63	237	TCTTCCCTTCCCTCCCATCCCACTCCATTCTTAACCATCATTCTTGTCAGCTCAGAGGAAGAGAACAACAATGTGAATGATAGacacacagagagagagagagGCAGGATGTAGAGAAGGGGAagagagagGTGGCAGAGAAGCATTGTTTTGGTTAATAGATCCAATAAATTTGACtttttttAAGATTTCTGTGGTGCAATATGATTCCTTCTTCACTagagagAAGCATGGTCT	TCTTCCCTTCCCTCCCATCC	AGACCATGCTTCTCTCTAGTGA	63	112	2	20	238	22	60.328	58.025	3.51	3.41	4.3023	F	274	ATCTTCCCTTCCCTCCCATCCCACTCCATTCTTAACCATCATTCTTGTCAGCTCAGAGGAAGAGAACAACAATGTGAATGATAGacacacagagagagagagagGCAGGATGTAGAGAAGGGGAagagagagGTGGCAGAGAAGCATTGTTTTGGTTAATAGATCCAATAAATTTGACtttttttAAGATTTCTGTGGTGCAATATGATTCCTTCTTCACTagagagAAGCATGGTCTGtctctctctcCCTAAATCATATAGCCATAGTCAAT
	M00842:287:000000000-BGGT4:1:1102:13022:16188	1	231	10	5	1	AG	AGAGAGAGAG	NA	1	1	3	4	92	CGGGAAAGACTAAAGCTTAAACTCGTATTGTTGAGACGGAGTTATGTAGAATAATagagagagagTTTAGGGAGAAGAGGGCGTATAATGTT	CGGGAAAGACTAAAGCTTAAACTCG	AACATTATACGCCCTCTTCTCCC	30	4	176	25	267	23	60.164	59.929	4.18	4.3	8.23515	A	283	TAGTGTGATACATATTAAGGTAGATTATGTAAACAATGTCTAGACCGTACTacacacCATGAAGATAGCTCGATAACCAACAATCATGGAAGTAAATTTGAAGCTTTTAAATAGCATGGTAATAACATCAAGTAATTGACTTATTTAATGGAGAAAGATTTGAGATAAGTAATAACGGGAAAGACTAAAGCTTAAACTCGTATTGTTGAGACGGAGTTATGTAGAATAATagagagagagTTTAGGGAGAAGAGGGCGTATAATGTTAAGATAtttttGTTAG
	M00842:287:000000000-BGGT4:1:1102:13590:11406	1	106	10	5	1	AT	TATATATATA	NA	1	1	4	33	121	AGCTCATCATCGATGTAAGAGCTATAtttttttATTTAtttttttGATTAttttttATtatatatataTTTATTTATTTTGCATGAAAATAATTATTAGGTTGCCTCCCAACAAGTGCTAA	AGCTCATCATCGATGTAAGAGCT	TTAGCACTTGTTGGGAGGCA	35	33	48	23	168	20	59.426	59.524	4.09	4.75	4.04988	F	210	ATAAGAACaaaaaGAAATTGATAGAATAGAAGTGAAGTGAGAAGAGAAGCTCATCATCGATGTAAGAGCTATAtttttttATTTAtttttttGATTAttttttATtatatatataTTTATTTATTTTGCATGAAAATAATTATTAGGTTGCCTCCCAACAAGTGCTAAGTTTTATGTCTTCAGTCAGACTAGGTTCCATAAGTTAATCAA
	M00842:287:000000000-BGGT4:1:1102:13841:22602	1	124	83	11	2	AT	ATATATATATATATATATATATACATACATACATACATATGTATGTTATATATGTGTGTGTATATATATATATACATATATAT	NA	1	1	2	57	257	GGAAGGAGTAAAGCTCAACTTGCTTTAACTGTCCCATCTTCATGatatatatatatatatatatatatACATATACATACatatatatatatatatatatatacatacatacatacatATGTATGTtatatatgtgtgtgtatatatatatataCatatatatGTACAtatgtatgtatgTACGTACATATGTGTCtgcgtgtgcgtgtgcgtgCGCTCCATTCAATCCCCATTGGGGCATGGAAGAAGGGACTCGT	GGAAGGAGTAAAGCTCAACTTGC	ACGAGTCCCTTCTTCCATGC	57	74	44	23	300	20	59.811	59.749	4.01	4.06	3.44001	D	361	TTCatatattatttttatttttattttTTAAATATCATAAAATGGAAGGAGTAAAGCTCAACTTGCTTTAACTGTCCCATCTTCATGatatatatatatatatatatatatACATATACATACatatatatatatatatatatatacatacatacatacatATGTATGTtatatatgtgtgtgtatatatatatataCatatatatGTACAtatgtatgtatgTACGTACATATGTGTCtgcgtgtgcgtgtgcgtgCGCTCCATTCAATCCCCATTGGGGCATGGAAGAAGGGACTCGTTCAAAACGACcacacaACTCATCACATCTCAATGCTGGTAAATTACGTAAATTAAATAGAG
	M00842:287:000000000-BGGT4:1:1102:13888:14122	1	134	20	5	1	AAAG	TTTCTTTCTTTCTTTCTTTC	NA	1	1	3	66	203	TCAAGGCATGGTGATAGTTGACATAATATTACCACATTTTGTTGTCATTCTACTCTTAGTCCATTTCAATGGaaaaaGCGAAGCATCAAtttctttctttctttctttcTTCttttttttttttAAAGaaaaaGATTATGTTTTAGAATTATAGATAAACATCACTTGGGAAACACAAAATCtgtgtgATGGCAGGGCTAGAA	TCAAGGCATGGTGATAGTTGACA	TTCTAGCCCTGCCATCACAC	66	74	45	23	247	20	59.991	59.747	3.58	3.82	3.26197	F	442	CATAGAATTTAGCTTGTAGTTGTTTCTACaaaaaCCaaaaaaTATCAAGGCATGGTGATAGTTGACATAATATTACCACATTTTGTTGTCATTCTACTCTTAGTCCATTTCAATGGaaaaaGCGAAGCATCAAtttctttctttctttctttcTTCttttttttttttAAAGaaaaaGATTATGTTTTAGAATTATAGATAAACATCACTTGGGAAACACAAAATCtgtgtgATGGCAGGGCTAGAAACCAGCTCCTTTATACCCATCTTTAGAGATTTTACCAACTTCACTAGATAAGCATTACTTGAGTTTAGATAACTAAATCACTGCAAATCCAAAGAAGGATTCCAAACAAAGTGGATTACGACTGAGTAAACTaaaaaCAACAAACCAttttt…
	M00842:287:000000000-BGGT4:1:1102:14373:12662	1	23	16	8	1	AG	TCTCTCTCTCTCTCTC	NA	1	1	3	2	127	GACCTACCGTGCCGAGCTCCAtctctctctctctctcTGCCATGCTGGGTTCGGTCCTCCATCATTCCTGAGCTCATTTGAGCTCCCAATTGCTGAACTCCCATGCATGAAGCCGAACTAGCACGTT	GACCTACCGTGCCGAGCTC	AACGTGCTAGTTCGGCTTCA	2	70	2	19	128	20	62.413	59.967	4.09	3.02	3.44583	A	320	TGACCTACCGTGCCGAGCTCCAtctctctctctctctcTGCCATGCTGGGTTCGGTCCTCCATCATTCCTGAGCTCATTTGAGCTCCCAATTGCTGAACTCCCATGCATGAAGCCGAACTAGCACGTTTTGAGCTTCTGCATCTGGGCCAAACTTTGGAGCCTCAGGCTCCCAACCGTGCCTGACCTGTCCTCATGTCTTTCACTTCCCTGAGTCCATTTATGACTCCTCTGGAGCTCCCATGGAGCTCCATCAAGCCTTGCCAAGCACCCGACACTAATCTCCTGTTGAGCTTCAGAGGCATGGAAACCCAAGCATGAT
	M00842:287:000000000-BGGT4:1:1102:14475:23940	1	83	10	5	1	AT	ATATATATAT	NA	1	1	5	5	91	ACATCCGGTGCTGTTGAGAAACCCAGAAAATTAATTACTGATTACATGCATAGGCatatatatatTCTTCCCAAATCACTCCTTGCATGCT	ACATCCGGTGCTGTTGAGAA	AGCATGCAAGGAGTGATTTGG	35	5	28	20	118	21	59.604	59.177	2.87	3.28	2.21943	A	174	AACTTGAATTTTCTCTTGTTGGTCATTACATCCGGTGCTGTTGAGAAACCCAGAAAATTAATTACTGATTACATGCATAGGCatatatatatTCTTCCCAAATCACTCCTTGCATGCTTGCAACTTTATATGTGCTGCTCTTTTCTAAACTCCAAATTCGATGAAAATAATGTT
	M00842:287:000000000-BGGT4:1:1102:14565:28681	1	89	12	6	1	AG	TCTCTCTCTCTC	NA	1	1	3	14	95	AGGCAGGACACAATACACAGGGAGAATTCTCAATCCtttttATCTCATtctctctctctcATTTTACTGTTTGTTGCTACTCCTGCTGACTTGAC	AGGCAGGACACAATACACAGG	GTCAAGTCAGCAGGAGTAGCA	27	14	41	21	135	21	59.996	59.726	4	3.49	2.27719	F	139	AGTTTTGTCGCTACACTATAAAAGAGACCCGATACTAATGAGGCAGGACACAATACACAGGGAGAATTCTCAATCCtttttATCTCATtctctctctctcATTTTACTGTTTGTTGCTACTCCTGCTGACTTGACCATC
	M00842:287:000000000-BGGT4:1:1102:14724:7793	1	158	22	11	1	AG	CTCTCTCTCTCTCTCTCTCTCT	NA	1	1	6	38	196	agGTCGTCTCTTCCTtctctctcTTGTCGCTtctctcCCCTCTTtctctcTTCCCTCGTCctctctctctctctctctctctCATGGTAGGTGGAGACCCCAATCCTTtctctcCTTTGACCATGAACGTGCCTAGCAGTGGTgggggTGGATCTGAGTGGTAAGCTAGCAATGTAGCCTGAGCAGTCTTGATCAA	AGGTCGTCTCTTCCTTCTCTCT	TTGATCAAGACTGCTCAGGC	38	94	98	22	293	20	59.692	57.895	3.1	4.85	4.41269	F	475	ATGGATCAATCCAACCaaaaaGCAATATGCACAAAAGTAGCTCTACGATTTTGGTGAGTGGCTTAGAGAAagagagagagagGAGTGATAGAAagagagGTCGTCTCTTCCTtctctctcTTGTCGCTtctctcCCCTCTTtctctcTTCCCTCGTCctctctctctctctctctctctCATGGTAGGTGGAGACCCCAATCCTTtctctcCTTTGACCATGAACGTGCCTAGCAGTGGTgggggTGGATCTGAGTGGTAAGCTAGCAATGTAGCCTGAGCAGTCTTGATCAAGAAAAGTTTGGAATAGGTGGAAGAGTATAAAAGAATAGAATAGGTGaaaaaaGAGTAtttttCATACAAGGAGAAagagagTAAAACTAATAAGAGAAGAGAACTT…
	M00842:287:000000000-BGGT4:1:1102:15019:23109	1	89	30	15	1	AT	TATATATATATATATATATATATATATATA	NA	1	1	1	29	176	GCATGTCAATCCTTTCATACACCTTCTTCTCTATAATTTATTAATTTGCAGTtatatatatatatatatatatatatatataACTAAGCAACAACATTTTCTCTAATACCATGACCCGCTTATCGAGGTACTAACCGCTCTAGTCTATCTCATACTGGGCCTCATAGTCTCATCCC	GCATGTCAATCCTTTCATACACC	GGGATGAGACTATGAGGCCC	29	74	37	23	212	20	58.075	59.02	4.16	5.8	5.90549	A	218	TATTCAtttttctctctAATAAGGTCATTATTATCAGCATGTCAATCCTTTCATACACCTTCTTCTCTATAATTTATTAATTTGCAGTtatatatatatatatatatatatatatataACTAAGCAACAACATTTTCTCTAATACCATGACCCGCTTATCGAGGTACTAACCGCTCTAGTCTATCTCATACTGGGCCTCATAGTCTCATCCCTCCAGT
	M00842:287:000000000-BGGT4:1:1102:15065:7558	1	92	10	5	1	AT	ATATATATAT	NA	1	1	4	23	105	tgatgatgCAATGCAATCCTAACAATCTACTAATGCTCAGATTTTAGAatatatatatGAATTTTCTTGAAAATTAATTCTAAGAGTAGCACAGATAGATTGTGT	TGATGATGCAATGCAATCCTAACA	ACACAATCTATCTGTGCTACTCTT	24	23	44	24	148	24	59.354	57.463	2.41	2.85	11.183	F	210	CGGTAGATCGGAATGATGCTCTGATACCAAAGTTAATGTGAAatgatgatgCAATGCAATCCTAACAATCTACTAATGCTCAGATTTTAGAatatatatatGAATTTTCTTGAAAATTAATTCTAAGAGTAGCACAGATAGATTGTGTATTGATCAAAGCAATAATCCCATATAAGTTTTACACTTCTTTACACTAAAGAAGGCAGAATC
	M00842:287:000000000-BGGT4:1:1102:15172:17825	1	198	14	7	1	AG	CTCTCTCTCTCTCT	NA	1	1	5	16	110	TCGGTCCTCACTCCTCAAGTCGAGAtttttAGGGTTTCAAGATTTTCTTTCATTGctctctctctctctCCGtttttttttttttACTCAGCTTTGGTAACTATTAGGGT	TCGGTCCTCACTCCTCAAGT	ACCCTAATAGTTACCAAAGCTGAGT	35	16	143	20	252	25	59.887	59.512	3.16	3.41	5.60045	F	322	TaaaaaCCCCACAGCCCTTTGTTTGACGctctctctCCGTCGTCCTCGTGTCTTCGAACCCTAAAAGCCCCACAgggggaggaggaggaggGAAATGCTGCCAAGTACATCACGAGATCAAGGGTAGTTCACCATCTTCAAGTCGGTCCTCACTCCTCAAGTCGAGAtttttAGGGTTTCAAGATTTTCTTTCATTGctctctctctctctCCGtttttttttttttACTCAGCTTTGGTAACTATTAGGGTTTCAAGAttttttttGCTCACTTTTAttttttACTTTTCTTTATTGAAGCGGCtttttGCCGAttttttC
	M00842:287:000000000-BGGT4:1:1102:15903:25879	1	150	16	8	1	AG	GAGAGAGAGAGAGAGA	NA	1	1	4	39	232	TTCACAGCCCATCTTCCCTcccccTTCTCGcacacaAAGTTTGATGCACAAGGAGACAGgagagagagagagagaGGCaaaaaCAAGAGTgagagaAGgagagaGGAAGTCCCTCCCTTTGTTCTCCTCCTTTGTGCTAGCCTATGGCCGGTGCTCGCCTCCAGTAACCTTAGATGTTGCTGGGGTTGTGCTgggggTTGGGAAAAGGGTCGGTCGGACCTCCAATTGACCA	TTCACAGCCCATCTTCCCTC	TGGTCAATTGGAGGTCCGAC	39	137	91	20	322	20	59.379	59.676	4.3	4.79	0.944185	F	386	attattattattTATTGCtattattattatTACTATTTTCATCTGGGCTTTTCTTTCTTTGTAGTGGGCCAGCCTAAAGCCACTACCATTTTCACAGCCCATCTTCCCTcccccTTCTCGcacacaAAGTTTGATGCACAAGGAGACAGgagagagagagagagaGGCaaaaaCAAGAGTgagagaAGgagagaGGAAGTCCCTCCCTTTGTTCTCCTCCTTTGTGCTAGCCTATGGCCGGTGCTCGCCTCCAGTAACCTTAGATGTTGCTGGGGTTGTGCTgggggTTGGGAAAAGGGTCGGTCGGACCTCCAATTGACCAGCATGCCCCACCTCTTTCTAGCTCAACCCATAGTGGTTGAGCATCTCTttcttcttcTTTTCTT
	M00842:287:000000000-BGGT4:1:1102:16207:5175	1	127	24	12	1	AG	AGAGAGAGAGAGAGAGAGAGAGAG	NA	1	1	2	13	186	AGGTCGTTAATGGCGAAACCTAGCAAAGAGACCTagagagagagagagagagagagagGTGGCATGGAAACTAGAGAAAGGAGAAAAGACAATGAAAGAGGACGTTTGTGGGTAGGGGAAAGAAGATAAGGGGAGGTAGGTTCATGCTAGGACGATCGTCCCTTGGCTCGCACGACCAATGCTTTC	AGGTCGTTAATGGCGAAACCT	GAAAGCATTGGTCGTGCGAG	13	108	93	21	278	20	59.997	60.179	3.5	5.03	1.18199	A	472	AGATTAGCCAAATTTAGGTAAAGgtgtgtCAATATAGTTAGGGTTAAACAAGGCAAAGAGAAAAGAGCTAAAAGGGaaaaaGAGATTTGGCAAGGTCGTTAATGGCGAAACCTAGCAAAGAGACCTagagagagagagagagagagagagGTGGCATGGAAACTAGAGAAAGGAGAAAAGACAATGAAAGAGGACGTTTGTGGGTAGGGGAAAGAAGATAAGGGGAGGTAGGTTCATGCTAGGACGATCGTCCCTTGGCTCGCACGACCAATGCTTTCGGGTTATGTCCATAACCCAAGACTTAGGTCCAACATATGTGATGCAAATAGaaaaaaCCGAAGGTTTCAAATGCATAAGAAACTAAAAGTTACAtttttCCCATTAGaaaaaaTGCCAAAT…
	M00842:287:000000000-BGGT4:1:1102:17130:20120	1	54	49	5	2	AG	TCTCTCTCTCTTTCTCTCTCTCCCTCTCCACCTCTCTCCCTCTCTCTCT	NA	1	1	2	25	170	GCATCATTGCCATTAACCACTaaaaaGGCATGTTTCCCCTTCTCTGtctctctctcTTtctctctctcCCTCTCCACctctctCCctctctctctTGGTGTGAGACCTAGGTAGTGGGAGtctctcTGTTtctctcTGTCTGTAGCCAAATAGAGGTTGAACTTGGGCCG	GCATCATTGCCATTAACCACT	CGGCCCAAGTTCAACCTCTA	25	55	8	21	177	20	57.193	59.676	4	2.43	4.13025	G	188	ATGGCTGGCATCATTGCCATTAACCACTaaaaaGGCATGTTTCCCCTTCTCTGtctctctctcTTtctctctctcCCTCTCCACctctctCCctctctctctTGGTGTGAGACCTAGGTAGTGGGAGtctctcTGTTtctctcTGTCTGTAGCCAAATAGAGGTTGAACTTGGGCCGGATGACCTGTG
	M00842:287:000000000-BGGT4:1:1102:17226:13926	1	103	68	18	1.5	AT	CTCTCTCTCTCTCTCTCTCTCTCTCTCTCTCTATATATATATATATATATATATATATATATATATAT	NA	1	1	4	78	293	AGGAAACtgtgtgGAAATTGGTATACCGATGGTTCTAATGCTCATTGGGCTGTCACAGGTTCTCTTTTATTCTTCTATTAGCATGTTACtttttttCTTCctctctctctctctctctctctctctctctctatatatatatatatatatatatatatatatatatatCTTCCCTTTTCCTTTTGATGTTTCATGAGCCaaaaaaTATTGTACTCTGTAATATGCAGTATTTGAAGCACTACAGGCCATTCCGAGATCTTCCCATCTTTGAGCGCTTTCCAGTTGTCACCTGC	AGGAAACTGTGTGGAAATTGGT	GCAGGTGACAACTGGAAAGC	78	105	3	22	295	20	58.358	59.688	3.67	3.51	3.95424	F	380	GTAGGAAACtgtgtgGAAATTGGTATACCGATGGTTCTAATGCTCATTGGGCTGTCACAGGTTCTCTTTTATTCTTCTATTAGCATGTTACtttttttCTTCctctctctctctctctctctctctctctctctatatatatatatatatatatatatatatatatatatCTTCCCTTTTCCTTTTGATGTTTCATGAGCCaaaaaaTATTGTACTCTGTAATATGCAGTATTTGAAGCACTACAGGCCATTCCGAGATCTTCCCATCTTTGAGCGCTTTCCAGTTGTCACCTGCGTCGCAGTCATTTGGatatatTCTCTTATTCTCACAGCAGGTGGTGCATACAATGGTAGACCCATCAGGACTCAAGATAGTTGCC
	M00842:287:000000000-BGGT4:1:1102:18065:25668	1	39	22	6	1.5	AG	TCTCTCTCTATCTCTCTCTCTC	NA	1	1	5	18	265	CGATCCTTCGTGGCCCTGCACCGGGTGGCGGCTCTTtctctctcTAtctctctctctcTTCTTTCCTCTCCCTTTCCctctctCCCCActctctTTCTTTCTGTTTTCctctctTTCcttcttcttctcctcctcCATCACCGGCATCTCGATCTAGCCACTGGAACTGTCCTAGTCCGCCACCAGTATGGCTTGAAACATCCCGAACAGAGTGGTCCAGAATGGTTCTGCCGACTATATTGTTACTTATGTCAGTGGCTGTCAG	CGATCCTTCGTGGCCCTG	CTGACAGCCACTGACATAAGT	18	186	3	18	267	21	60.203	57.675	4.45	2.24	5.52822	B	267	ATCGATCCTTCGTGGCCCTGCACCGGGTGGCGGCTCTTtctctctcTAtctctctctctcTTCTTTCCTCTCCCTTTCCctctctCCCCActctctTTCTTTCTGTTTTCctctctTTCcttcttcttctcctcctcCATCACCGGCATCTCGATCTAGCCACTGGAACTGTCCTAGTCCGCCACCAGTATGGCTTGAAACATCCCGAACAGAGTGGTCCAGAATGGTTCTGCCGACTATATTGTTACTTATGTCAGTGGCTGTCAG
	M00842:287:000000000-BGGT4:1:1102:19012:8884	1	164	24	6	1	AAAT	AATAAATAAATAAATAAATAAATA	NA	1	1	8	101	295	GCAAGCATCAACACCTTcccccTCTCCCTTCCCTCTTTGCCTCATGCGTCAACAATCGTGCATGAGAAGGAGGTAGGGAGAGGGGCTTTGTTTGGCAATGGGCCATGGGCTGGTCCATTACACCAGGgagagaAGGCCCAGGGTGAGGaataaataaataaataaataaataAAAATAATAGTAAACAAATGAATAAAATAATAGACaaaaaTGAGGGTaaaaaaaGAGGAAAAGaaaaaGAAAGAAGAGGAAGAAAGGGAGGAAGgaaagaaagaaaGTAAGAAAGAGGCAGCA	GCAAGCATCAACACCTTCCC	TGCTGCCTCTTTCTTACTTTCT	128	101	16	20	310	22	59.755	57.642	3.97	2.52	4.60264	F	310	CAACAACCACTGGAGGCAAGCATCAACACCTTcccccTCTCCCTTCCCTCTTTGCCTCATGCGTCAACAATCGTGCATGAGAAGGAGGTAGGGAGAGGGGCTTTGTTTGGCAATGGGCCATGGGCTGGTCCATTACACCAGGgagagaAGGCCCAGGGTGAGGaataaataaataaataaataaataAAAATAATAGTAAACAAATGAATAAAATAATAGACaaaaaTGAGGGTaaaaaaaGAGGAAAAGaaaaaGAAAGAAGAGGAAGAAAGGGAGGAAGgaaagaaagaaaGTAAGAAAGAGGCAGCA
	M00842:287:000000000-BGGT4:1:1102:19253:5033	1	194	14	7	1	AG	CTCTCTCTCTCTCT	NA	1	1	4	33	133	TAAGGGAAGTCAGGAGGCCACGGGCCCTCTATCCCTCCctctctTTCCTTTCCctctctctctctctTTTCctctctctCATTCTCCtttttttGCCTGGTCCATGCAGCTGTCGACCTTGTGAAGCCCTTCA	TAAGGGAAGTCAGGAGGCCA	TGAAGGGCTTCACAAGGTCG	33	46	141	20	273	20	59.882	60.25	5.36	4.79	0.36864	F	324	CGCACGTTGTTGGGGTTTACTCTGAGATCCCTTCGGACGTGTCACTATGCTGCTAAGCAGAGAAGGGGCTCCACCTCCAGAGTCCCTTTTCGTTCAAAACAGGGGTCCTAAAgggggACCCCTTTTAATTTCAAAACTTTTAAGGGAAGTCAGGAGGCCACGGGCCCTCTATCCCTCCctctctTTCCTTTCCctctctctctctctTTTCctctctctCATTCTCCtttttttGCCTGGTCCATGCAGCTGTCGACCTTGTGAAGCCCTTCACCGACCACTGGCCAtctctcCCTATTCCTCCTCTCCCTTTCCCTTCCTCCC
	M00842:287:000000000-BGGT4:1:1102:19538:27644	1	25	35	6	2	AG	TCTCTCTCTCTCGCTTCTCTTGAACCTCTCTCTCT	NA	1	1	4	0	108	AGATCGGAAAGCAAAGTCACCTtctctctctctcGCTTCTCTTGAACctctctctctTCCTCCTTGCTTCATTTGGCAACTTCCCCTTCTCCTCTGAATTGTTCGCCA	AGATCGGAAAGCAAAGTCACCT	TGGCGAACAATTCAGAGGAGA	0	30	3	22	110	21	59.961	59.377	4	3.71	3.6624	D	254	GTAGATCGGAAAGCAAAGTCACCTtctctctctctcGCTTCTCTTGAACctctctctctTCCTCCTTGCTTCATTTGGCAACTTCCCCTTCTCCTCTGAATTGTTCGCCATTGTTAGTCATCAGGAAATCCATGCACTGGCACATAAGTTGAGGTAAGACTCCGATCGTCACTCCCTTGTTGTATTTTGTGCTTATTAGGGTTGGACAATAAAGGCCCAACAGTGAGAAAggggggAAACAGCCTAATCGGCCG
	M00842:287:000000000-BGGT4:1:1102:19577:5459	1	137	17	5	1.5	AG	AGAGAGAGAGTTCTCTC	NA	1	1	3	68	240	AGCAGAAAGGCCATGATAGCAACAGCTAGAAAGGCAAAGTAGGACATGATGGTGATTGAAGTTTTGCTGGGTGCCTGTGCTtgtgtgCAGTTTCCTTTGTATTTGTCCTCCtttttCTATGAGAGGAGGGCACACagagagagagTtctctcTGCCTTACCCTTTGATATGCATTGATTTACAAAAGAATTAGCACCTCCTGCTGCTATCCGGACCTCGTGACATGGCACGGCTGATCAG	AGCAGAAAGGCCATGATAGCA	CTGATCAGCCGTGCCATGTC	114	68	2	21	241	20	59.786	61.435	3.49	3.06	2.6483	F	453	CAGCAGAAAGGCCATGATAGCAACAGCTAGAAAGGCAAAGTAGGACATGATGGTGATTGAAGTTTTGCTGGGTGCCTGTGCTtgtgtgCAGTTTCCTTTGTATTTGTCCTCCtttttCTATGAGAGGAGGGCACACagagagagagTtctctcTGCCTTACCCTTTGATATGCATTGATTTACAAAAGAATTAGCACCTCCTGCTGCTATCCGGACCTCGTGACATGGCACGGCTGATCAGCATCATGCTAGAGTTAACAGCTTTGAGCAACTGATTTAGAAAAGAATGGCCTCTATCAATGCTTTGGTAatatatGCAGAATGCAGGGAATGTACTTTACTATTTGCAAACGAATATCCaaaaaaaCaaaaaaaaTGATGGTCTTCAAATaaaaaTTA…
	M00842:287:000000000-BGGT4:1:1102:19706:20924	1	181	30	6	1.5	AG	AGAGAGAGAAAGAGAGAGAGAGGAGTGTGT	NA	1	1	2	42	192	GGTATTCAATTGGTGTTACGACATCTAACTTTCCAAAGTGCATAGTTTGATTAAGGGTTACCATTAGAAAGATACATAGacacacacCAGATGTGCagagagagAAagagagagagagGAgtgtgtCATACTTTAGCTTGtttttATCATTTAAGTATGAAAGCATGATGGAGAAATTTCAGCAAGGTAACC	GGTATTCAATTGGTGTTACGACA	GGTTACCTTGCTGAAATTTCTCCA	73	42	85	23	276	24	57.134	59.477	4.35	3.86	10.3891	F	281	GATTCATTGAACTATGATGTTTACTAAGGACAAGCCTACCATTTTAAAGCTAAATCGAAGACGTTTTATTATAGCATGTAATTAGGTATTCAATTGGTGTTACGACATCTAACTTTCCAAAGTGCATAGTTTGATTAAGGGTTACCATTAGAAAGATACATAGacacacacCAGATGTGCagagagagAAagagagagagagGAgtgtgtCATACTTTAGCTTGtttttATCATTTAAGTATGAAAGCATGATGGAGAAATTTCAGCAAGGTAACCTCATA
	M00842:287:000000000-BGGT4:1:1102:19987:27337	1	27	26	13	1	AG	TCTCTCTCTCTCTCTCTCTCTCTCTC	NA	1	1	4	1	92	AGCCCATAGTAAACTCCCTTGGGtctctctctctctctctctctctctcTTCTGGTTCTCTTCCCCTCTTTAAGCTCTTCTCCTCCCGTTCT	AGCCCATAGTAAACTCCCTTGG	AGAACGGGAGGAGAAGAGCT	1	23	4	22	95	20	59.49	59.96	3.61	4.09	2.55046	A	160	GTTAGCCCATAGTAAACTCCCTTGGGtctctctctctctctctctctctctcTTCTGGTTCTCTTCCCCTCTTTAAGCTCTTCTCCTCCCGTTCTCtttttCACTGTAACCGaaaaaGGGGAGAGGGTccccccATTTGTGACCAGCTTGGTGGTTCGAC
	M00842:287:000000000-BGGT4:1:1102:20176:24185	1	34	10	5	1	AG	TCTCTCTCTC	NA	1	1	3	2	145	TGCCAATAAGACCTCCTCAGCAAtctctctctcAATGGTAGCTTTAGCGATTTGGTTTTCCCAAGATTGACTAAGTTTGCTAAACCTACCCAGGGTATCCTTCAAGATAAACATATCCTGAATAAGCTGCAAGAAAGAAAGTTGA	TGCCAATAAGACCTCCTCAGC	TCAACTTTCTTTCTTGCAGCTT	2	90	11	21	155	22	59.79	57.011	4.26	3.74	6.19976	A	409	CCTTCTTGGATGCCAATAAGACCTCCTCAGCAAtctctctctcAATGGTAGCTTTAGCGATTTGGTTTTCCCAAGATTGACTAAGTTTGCTAAACCTACCCAGGGTATCCTTCAAGATAAACATATCCTGAATAAGCTGCAAGAAAGAAAGTTGAATAAGTCAACTGAATATCAAAGAAGAAAagagagaaaaaCTGAAGAGGAAAagagagAAATCCTTACCTCTGTCATAGATGGGaaaaaTGAAGAGAAGATGTCATTCAATGAATGAAATCTCCTCTTAGTTTCATCCCAAGGTAGCATGAGAAGCTTCAACAACTCCATTGCTGCCTTCGGATCATagagagTTGACTCCCCTCCTCAGAACTGAACTTCAAATGCGGCCATGTCTGGCTCGCC…
	M00842:287:000000000-BGGT4:1:1102:21126:13492	1	46	16	8	1	AG	CTCTCTCTCTCTCTCT	NA	1	1	5	14	149	GGGCActctctctAAACACCTTTATATTCCACTTCctctctctctctctctTGTATACTCTTTGTTGCCACTCTCACTAACTTGATTATTGGAGGATTCTTGGCAAATCTATATCTAGCGAGGGCTTGCTTGCAAGGCCGTACACCATA	GGGCACTCTCTCTAAACACCT	TATGGTGTACGGCCTTGCAA	14	78	11	21	159	20	59.097	59.675	4	4.08	2.22846	F	175	ATAGCAAAAGGGGCActctctctAAACACCTTTATATTCCACTTCctctctctctctctctTGTATACTCTTTGTTGCCACTCTCACTAACTTGATTATTGGAGGATTCTTGGCAAATCTATATCTAGCGAGGGCTTGCTTGCAAGGCCGTACACCATACAGAGGAGACCACAGT
	M00842:287:000000000-BGGT4:1:1102:21348:4006	1	82	26	5	1.5	AAG	AAGAAGAAGAAGAAGAGGAAGAAGAA	NA	1	1	14	2	92	AGAGCAAGGGAAGTCGATGATGAAGCAGATGATAAAGAATaagaagaagaagaagAGgaagaagaaACAGAAGCTATGGATGAAGAAGGTGA	AGAGCAAGGGAAGTCGATGA	TCACCTTCTTCATCCATAGCTTCT	20	2	42	20	133	24	58.438	59.281	2.92	2.85	6.28042	B	190	GTAGATCGGAAGATGGAACAAAAGCTATGGATGATGAAGTTAGAGCAAGGGAAGTCGATGATGAAGCAGATGATAAAGAATaagaagaagaagaagAGgaagaagaaACAGAAGCTATGGATGAAGAAGGTGAAAaagaagaagaagaagaagaagAATATGAAGAACGAGAAGGAGAAGATAAAATACA
	M00842:287:000000000-BGGT4:1:1102:21626:26631	1	218	47	17	2	AG	ACACACACACCCCGAGAGAGAGAGAGAGAGAGAGAGAGAGAGAGAGA	NA	1	1	4	26	290	CTTTGGAATATGATGGTAACTCAGGTGAATCATTTCACAGATCCAAGCATGATACTAGAGATTGCAAGGATATAAGCCGCtttttttttCTTACaaaaaaCTAGCAAATAAACATAAAATGCAGACAAAGTACAGCTATTAATCAAGAtttttGTTTGCCAACAGTAGCTGaaaaaTGAGAAAGATGAATGAAAacacacacacCCCgagagagagagagagagagagagagagagagagaGGCTGAAAATGTTGTCATGTTGATTTCTCCGAGCCTTACTTCTAAACAT	CTTTGGAATATGATGGTAACTCAGG	ATGTTTAGAAGTAAGGCTCGGAG	169	26	24	25	313	23	57.498	57.988	3.86	4.63	12.5144	G	319	TTTGGTTCGAAGAAATGTATATTCTTTGGAATATGATGGTAACTCAGGTGAATCATTTCACAGATCCAAGCATGATACTAGAGATTGCAAGGATATAAGCCGCtttttttttCTTACaaaaaaCTAGCAAATAAACATAAAATGCAGACAAAGTACAGCTATTAATCAAGAtttttGTTTGCCAACAGTAGCTGaaaaaTGAGAAAGATGAATGAAAacacacacacCCCgagagagagagagagagagagagagagagagagaGGCTGAAAATGTTGTCATGTTGATTTCTCCGAGCCTTACTTCTAAACATATAGGA
	M00842:287:000000000-BGGT4:1:1102:21875:24963	1	280	22	11	1	AG	AGAGAGAGAGAGAGAGAGAGAG	NA	1	1	3	24	267	TCGGCGAAGAGATTGTTGTCAtttttCTTCCGTTttccttccttccTTGATTCAAAGAAGATTCAAGAAATATTCTGATACAAACCCTTTAAAAGAGAAATGGTGTTGTTGGAAATGTggaggaggaAAAGGTGAAAGAAAAGAAAGCTGTAGATTCTTTCTTTGGAGACTGACTTTTCTCTTCCTCCTTGGCTCCTCATATAagagagagagagagagagagagGGGAGCGGCTATAAGCAAAATCGCAACTCCAGCGTTGTCCCA	TCGGCGAAGAGATTGTTGTCA	TGGGACAACGCTGGAGTT	182	24	77	21	343	18	60	58.764	3.58	3.01	4.23679	F	396	GAGCATGCATCCGAGGAGATTACGGCGGAGGCGAGTACGGTCAGCAGGGCGGCGgagagaAGGAAGAGTAACAGAGTCGGCGAAGAGATTGTTGTCAtttttCTTCCGTTttccttccttccTTGATTCAAAGAAGATTCAAGAAATATTCTGATACAAACCCTTTAAAAGAGAAATGGTGTTGTTGGAAATGTggaggaggaAAAGGTGAAAGAAAAGAAAGCTGTAGATTCTTTCTTTGGAGACTGACTTTTCTCTTCCTCCTTGGCTCCTCATATAagagagagagagagagagagagGGGAGCGGCTATAAGCAAAATCGCAACTCCAGCGTTGTCCCAATGGCAGGAAAAgggggAGCGGAGAAGAGCGGAAATGACACGAGGCCAAATGG
	M00842:287:000000000-BGGT4:1:1102:21912:8273	1	24	10	5	1	AG	CTCTCTCTCT	NA	1	1	7	1	123	CTTCCACCCACTCTCGCACCctctctctctTTTCctctctTACCTTCTCCCTCTcccccTTCTACCGGTTTCTCATTTTAAATGCTGGAACCATATCCAATCTACTGCTTTGGGATGATTCCA	CTTCCACCCACTCTCGCAC	TGGAATCATCCCAAAGCAGT	1	73	4	19	126	20	60.375	57.095	5.34	4.4	4.28017	F	383	GCCCTTCCACCCACTCTCGCACCctctctctctTTTCctctctTACCTTCTCCCTCTcccccTTCTACCGGTTTCTCATTTTAAATGCTGGAACCATATCCAATCTACTGCTTTGGGATGATTCCAGATTCCTTGAACAAAGGTATGCACATCGAGAGCACAAGGAATAAGATTGAATTTGCCTTTGAAATTAGTCAGCTTTTAAAGCTGATACTAGAGAAATTCCTTACTAACTGTTGCATaaaaaaCAGTTACATCCCTTGATCCCTGGAAGTTACTGCATAGATAAGACATGAGCTTATGTGCATTTCTGAGTTGCCTGATAGATTAAAACCAAAATACCATAAACAGTTAGTTGTCTATCTGATGTGCTTAGAGCAGGC
	M00842:287:000000000-BGGT4:1:1102:22090:11968	1	37	92	46	1	AT	ATATATATATATATATATATATATATATATATATATATATATATATATATATATATATATATATATATATATATATATATATATATATATAT	NA	1	1	4	0	151	GGGAAGATGCAATGGGTACAatatatatatatatatatatatatatatatatatatatatatatatatatatatatatatatatatatatatatatatatatatatatatatGGGATAATTTGGAGTAGATAGAAAGTCGGGCCTGACATC	GGGAAGATGCAATGGGTACA	GATGTCAGGCCCGACTTTCT	0	19	17	20	167	20	57.565	59.749	2.9	2.52	2.68589	A	311	ATAGCAACAAAATCTGGGGAAGATGCAATGGGTACAatatatatatatatatatatatatatatatatatatatatatatatatatatatatatatatatatatatatatatatatatatatatatatGGGATAATTTGGAGTAGATAGAAAGTCGGGCCTGACATCTCGAATGTGCAATGCAGGTAAAATGgtgtgtACGTGATCCAAAAGGCAAGCTGATGCTGAGGATGTACTGCTAGCCAGTACCCAACATGATGCAGATccccccAGGAGACACAGGGCTGCCTCGATGGCTGAGGCACCATCCGA
	M00842:287:000000000-BGGT4:1:1102:2241:18828	1	22	15	5	1	AAG	TTCTTCTTCTTCTTC	NA	1	1	8	0	90	TTGCAGGGCAAGGTCTGTttcttcttcttcttcCTCTTTGATGATTTTGCCCTCCAGTCTAAGTACAAGGGTGATACGCAAATTTACAAT	TTGCAGGGCAAGGTCTGT	ATTGTAAATTTGCGTATCACCCTTG	0	32	4	18	93	25	59.074	58.671	3.41	3.61	9.25575	A	314	TTATTGCAGGGCAAGGTCTGTttcttcttcttcttcCTCTTTGATGATTTTGCCCTCCAGTCTAAGTACAAGGGTGATACGCAAATTTACAATATCTGacacacATTTAGTGAACACCTAATAGGCAttttttGAGTATCTGTTACACATATTTTGAGTAGCTAAAACACATTTGTTTAAACTATCACTTGTCTCTTAGTTAGAACAAAATTGTTgagagaCTGCTAAATGTGTATATTCTCCAAAAGAAATAAATCGGCCTTCCCTTCCAAGTTCAAGAAATAAATTGGCCTTCCCTTGCAAGTTCAACAATA
	M00842:287:000000000-BGGT4:1:1102:22605:20948	1	70	10	5	1	AG	CTCTCTCTCT	NA	1	1	3	47	248	GgagagaTGGAATGGCCGACATGGGACTTACATGCATCCAAGACCcttcttcttGCGCTCTCCCTCCctctctctctTGTTTCATCTCCTTTCTCTGATCCGTGCtttttttAATTTCTCCTCGTTCTTTGTTGGTATTTACAGTGGACCGGGACGGACAAGGCGACATAGTCTATTTTCCGCGACAGTTGAGAAAGACGTGACGGCTCCACTGAAGTCGGAAAGGCCGTTCCGACACGCTTGCTAGG	GGAGAGATGGAATGGCCGAC	CCTAGCAAGCGTGTCGGAA	47	152	3	20	250	19	60.25	60.08	4.79	4.3	1.33017	F	275	CTGgagagaTGGAATGGCCGACATGGGACTTACATGCATCCAAGACCcttcttcttGCGCTCTCCCTCCctctctctctTGTTTCATCTCCTTTCTCTGATCCGTGCtttttttAATTTCTCCTCGTTCTTTGTTGGTATTTACAGTGGACCGGGACGGACAAGGCGACATAGTCTATTTTCCGCGACAGTTGAGAAAGACGTGACGGCTCCACTGAAGTCGGAAAGGCCGTTCCGACACGCTTGCTAGGCCGGGTGCCAAAATGGCGCGTTCTC
	M00842:287:000000000-BGGT4:1:1102:22692:10304	1	314	16	8	1	AG	TCTCTCTCTCTCTCTC	NA	1	1	2	5	103	CCTGAGATCCAATACCGAGGGATTCAATCAATCGCTCCTCTTGCTCTGTCCTCTCCACTTtctctctctctctctcTTTAATCGATCAAGACTCCAGGTTCTT	CCTGAGATCCAATACCGAGGG	AAGAACCTGGAGTCTTGATCGA	39	5	254	21	356	22	59.379	58.834	4.3	3.59	4.78669	A	385	CGGTAGATCGGATGATCCACAGCCACTCGAAGGTGGCCACTATGAAGGCCTTCATGGCAAAGTTGCCgagagaTTACCCCTCTCGAGAGGGGAGGTGCTCTACGTTGCGGGTCTGGCGGCATTAGGGTTACAGAAGGAGAATAGCCCTAAGCCTAAGTTCACTGCAAATGGGCAGTAGCCACAGGACTGATTAGGCCCCAGTGCTTCCAATCTCCTTAAGAATTCGCATGGATTCCTCTCAActcctcctcTCCCTGAGATCCAATACCGAGGGATTCAATCAATCGCTCCTCTTGCTCTGTCCTCTCCACTTtctctctctctctctcTTTAATCGATCAAGACTCCAGGTTCTTAGAACCTAGAAGGGtttttCttttttttt
	M00842:287:000000000-BGGT4:1:1102:23075:19880	1	127	18	9	1	AG	TCTCTCTCTCTCTCTCTC	NA	1	1	4	16	173	GGTCACCCTTACAGCTACCGTAGTTGTCAGTAGTGCCaaaaaGGGGTGGATGGGCTTGAGGTTGTGGTGATGGGGAGGGCATGGAGATagagagACAAAGggaggaggaGGTCCCTACTtctctctctctctctctcTTTCAGTCTATGGTTGCAAGGCAGTCACAGCGTTAG	GGTCACCCTTACAGCTACCG	CTAACGCTGTGACTGCCTTG	99	16	8	20	180	20	59.825	59.207	4.02	3.61	0.967713	F	200	GATGATCGGTCACCCTTACAGCTACCGTAGTTGTCAGTAGTGCCaaaaaGGGGTGGATGGGCTTGAGGTTGTGGTGATGGGGAGGGCATGGAGATagagagACAAAGggaggaggaGGTCCCTACTtctctctctctctctctcTTTCAGTCTATGGTTGCAAGGCAGTCACAGCGTTAGCTATAGGCTCTCCCAGAGCT
	M00842:287:000000000-BGGT4:1:1102:23501:6334	1	35	18	6	1	AAT	TAATAATAATAATAATAA	NA	1	1	2	13	153	ATGACAACCAGCCACGTGTAAGttttttttAATtaataataataataataaCTGCATCTGAAGAACACAAGGACATCCAATAGCCAAAAGGAACTTGTGGATCTCCTATAAGTTATATGCTATCCCATTACTCCACATGAATCAGTCTGCACA	ATGACAACCAGCCACGTGTA	TGTGCAGACTGATTCATGTGGA	13	80	2	20	154	22	59.605	59.961	2.9	4.02	2.43376	F	287	AATGACAACCAGCCACGTGTAAGttttttttAATtaataataataataataaCTGCATCTGAAGAACACAAGGACATCCAATAGCCAAAAGGAACTTGTGGATCTCCTATAAGTTATATGCTATCCCATTACTCCACATGAATCAGTCTGCACATAAATTATAATCTTCTTAATCCTTGATTGGGATTTTGTTTGTGAATGTAatatatTTGTATTAAAATTTGAATGGATTGTTTGAtttttttAAGGAATAATCAGGTAGTGGCATGGCAAGGAACACTTTCCTT
	M00842:287:000000000-BGGT4:1:1102:24220:11799	1	137	23	5	2	AG	AGAGAGAGAGGGAAGAGAGAGAG	NA	1	1	5	29	209	TCGGTGGTCATGGCAATCCCCACAAAAGATTGGGGATGGTGGTCGGGCAGCTAGTCGGGCATGGGGAAGACAGCAAGGGGTGGTGCATGGAGTCTATGGGCTTTACAGGCCTATGGGCATTTGATGAGTCTAGAACagagagagagGGAagagagagagggggggagagagGGAAGATCTGAGGAgggggAGCCAGGAAGAGATAAGGG	TCGGTGGTCATGGCAATCC	CCCTTATCTCTTCCTGGCTCC	117	29	1	19	209	21	60.078	59.303	3.01	4.7	2.77467	G	225	TCGGTGGTCATGGCAATCCCCACAAAAGATTGGGGATGGTGGTCGGGCAGCTAGTCGGGCATGGGGAAGACAGCAAGGGGTGGTGCATGGAGTCTATGGGCTTTACAGGCCTATGGGCATTTGATGAGTCTAGAACagagagagagGGAagagagagagggggggagagagGGAAGATCTGAGGAgggggAGCCAGGAAGAGATAAGGGGAGAGGAgggggAGAG
	M00842:287:000000000-BGGT4:1:1102:25037:7947	1	163	18	6	1	AGG	GAGGAGGAGGAGGAGGAG	NA	1	1	5	18	95	agaagaagaCTTGGCCGACGAGGAGGACGACGCCATGAgaggaggaggaggaggagAATAAGgagagaAGGGTTGGGGAGTAGAAGGCCCGCTTC	AGAAGAAGACTTGGCCGACG	GAAGCGGGCCTTCTACTCC	18	20	125	20	219	19	60.038	59.856	5.12	3.85	1.18243	F	472	GAAAAGAGGAAGGCAGACCTCCGACGCCGACATTGGCGGCGAGGAAAAGCGGCAGGATTCGACGGAGGAAGCCCTTCTTGGCCACAGGTGGAgggggCGGAGGAGGCGGAGCAGAGGCAGCAGTagaagaagaCTTGGCCGACGAGGAGGACGACGCCATGAgaggaggaggaggaggagAATAAGgagagaAGGGTTGGGGAGTAGAAGGCCCGCTTCGGCTTCCTATATGtatatataTGtatataTGtatatataTGTATACATAtgtgtgtgtgtgtgtatataTGTATATGTGGAttttttACTGTAATGCTAATGCAACTACTAATTAAATTATAAATATAATTAAAGGATGGTAAGAAACTTTATGTCTGAACATGTACTACAACTCAAGTT…
	M00842:287:000000000-BGGT4:1:1102:25564:8938	1	66	10	5	1	AG	AGAGAGAGAG	NA	1	1	3	3	103	AAACCATAGCATGCGGTTGCATAagagagagagGAGGAGTGAGAGGAGAAAGATATGATGGCTAGGGTTTCAAGAGAAAATGCTTGTTCTTTATTAATCGCCA	AAACCATAGCATGCGGTTGC	TGGCGATTAATAAAGAACAAGCA	3	47	43	20	145	23	59.827	57.111	4.17	3.91	6.06195	A	209	AGATCGGAAGAGCGGTTTTATGTGATGAAATCTTTTAACAAGAAACCATAGCATGCGGTTGCATAagagagagagGAGGAGTGAGAGGAGAAAGATATGATGGCTAGGGTTTCAAGAGAAAATGCTTGTTCTTTATTAATCGCCAATTAAAATAGGATATTTATACTCATTATAATTAGATCAAAATCTAAGCTCaaaaaaCTTCCTGG
	M00842:287:000000000-BGGT4:1:1102:26297:22686	1	151	56	22	1.5	AC	TATATATATATATGTGTGTGTGTGTGTGTGTGTGTGTGTGTGTGTGTGTGTGTGTG	NA	1	1	3	28	219	ACACAGATGCTAGCTTTGATCCTGATTTACATATGTATTGTTCGCATACTGAACAATATGACCCTTGAGCAGTCTCAATATACATTTGTCCGTCGTGTTTAACACATATGtatatatatatatgtgtgtgtgtgtgtgtgtgtgtgtgtgtgtgtgtgtgtgtgtgTATGCATATAGTCCTCTTTTCATTATCAATATACAGTCTACTCGTAAAGCCAT	ACACAGATGCTAGCTTTGATCCT	ATGGCTTTACGAGTAGACTGTATAT	87	28	41	23	259	25	59.8	57.237	3.24	0.86	10.9621	B	259	ATTATCCGACCCACCAAGTAAGGGCTTGCCAGTATAACATACACAGATGCTAGCTTTGATCCTGATTTACATATGTATTGTTCGCATACTGAACAATATGACCCTTGAGCAGTCTCAATATACATTTGTCCGTCGTGTTTAACACATATGtatatatatatatgtgtgtgtgtgtgtgtgtgtgtgtgtgtgtgtgtgtgtgtgtgTATGCATATAGTCCTCTTTTCATTATCAATATACAGTCTACTCGTAAAGCCAT
	M00842:287:000000000-BGGT4:1:1102:2705:11276	1	133	18	6	1	AAC	TGTTGTTGTTGTTGTTGT	NA	1	1	2	50	239	AGGAGCCTAGGAAATTTACTTCGTtgtgtgGTAagagagCAAGACGACCCCACTTAGTGGGATAAAGGATTGAGtgttgttgttgttgttgtTTGGTAagagagCATGTTAGGAACTTGGATTTACTTTGCCCTATTCCAAATTTGtatataATAGTTCGGtatataGGTCTATTGGTATGAGTCCTTTTGAGGTTGTTGAGTGTTATCACCCTAGCAAGCTAGTAGACCTGATCCCGT	AGGAGCCTAGGAAATTTACTTCGT	ACGGGATCAGGTCTACTAGC	50	127	59	24	297	20	59.53	58.016	3.85	3.42	6.45437	B	407	ATTAAAAGTTTCACCTACCTATCACCCACAAACTGATGGCTAAACCGAAGTTATAAATAGGAGCCTAGGAAATTTACTTCGTtgtgtgGTAagagagCAAGACGACCCCACTTAGTGGGATAAAGGATTGAGtgttgttgttgttgttgtTTGGTAagagagCATGTTAGGAACTTGGATTTACTTTGCCCTATTCCAAATTTGtatataATAGTTCGGtatataGGTCTATTGGTATGAGTCCTTTTGAGGTTGTTGAGTGTTATCACCCTAGCAAGCTAGTAGACCTGATCCCGTTACCTGTGCATGCTTTGGTGTCAGAGTCCACTTCATCCTTCATAGAGCTTATTCTCTGTCTGCATGAAGTTTTCAGCGCTAAAATTATTATCAGCAATCAAA…
	M00842:287:000000000-BGGT4:1:1102:27266:18231	1	92	10	5	1	AT	ATATATATAT	NA	1	1	3	36	242	TGGTCAATAGGAGCCATGCAAGTGATCTCTTCCAAACATATGTATACGCAACATGCatatatatatGGATGCATATTCCTTGtttttATGATTATGCATTATATGCCAAtttttGTTTTGTAATATAATGtttttttttGTTCTTGAtttttGAATAAAGGTTTGCCAAGAttttttACATGGAAAGTGTGAACGCAAATCTTGTAGGTATTCTCATGTTTAAGCTCATCCGACAGCTCAAG	TGGTCAATAGGAGCCATGCA	CTTGAGCTGTCGGATGAGCT	36	156	36	20	277	20	59.082	59.825	3.96	4.09	1.09356	F	406	CtttttCACAAGACTAtttttttGATaaaaaTTCATGGTCAATAGGAGCCATGCAAGTGATCTCTTCCAAACATATGTATACGCAACATGCatatatatatGGATGCATATTCCTTGtttttATGATTATGCATTATATGCCAAtttttGTTTTGTAATATAATGtttttttttGTTCTTGAtttttGAATAAAGGTTTGCCAAGAttttttACATGGAAAGTGTGAACGCAAATCTTGTAGGTATTCTCATGTTTAAGCTCATCCGACAGCTCAAGTTAGAGATATTTCCTCTACTTTATCTTCATGTTTCCTACCGTTACTACTCTTTCATGCTTTAGTAGTTTGACTATTTGCatatatGCATGCAATTGTAGGACATATAATGCTTGTTGGGATT…
	M00842:287:000000000-BGGT4:1:1102:28228:13269	1	196	24	8	1	AAG	AAGAAGAAGAAGAAGAAGAAGAAG	NA	1	1	2	65	299	ACGTTATTACACAGTCTATCCGAATACTTTACACTTGATATTGCACAAAACAGAGGCTAGCAGGCTCCGACATTTTATTCATAAACTTTACAAATGCAAGATTAAAGTGCATAAGCATAGGGATACATTAGAAAGAAACAAAGaaaaaGaaaaaaCATaaaaaaTTACAATTGGCTAACAAGATCTGAAAAaagaagaagaagaagaagaagaagAAAGATAGAAACTCTAAGGCACCAAAGCAACTTAGGGGATAGGTCCCCTATCCAACCTCTTGAAGCCTTTGGGCAGAGGAAGGG	ACGTTATTACACAGTCTATCCGAA	CCCTTCCTCTGCCCAAAGG	167	65	5	24	303	19	57.559	60	4.3	3.11	7.44149	F	323	GGCTACGTTATTACACAGTCTATCCGAATACTTTACACTTGATATTGCACAAAACAGAGGCTAGCAGGCTCCGACATTTTATTCATAAACTTTACAAATGCAAGATTAAAGTGCATAAGCATAGGGATACATTAGAAAGAAACAAAGaaaaaGaaaaaaCATaaaaaaTTACAATTGGCTAACAAGATCTGAAAAaagaagaagaagaagaagaagaagAAAGATAGAAACTCTAAGGCACCAAAGCAACTTAGGGGATAGGTCCCCTATCCAACCTCTTGAAGCCTTTGGGCAGAGGAAGGGAGGAGATGGAGATAGGAGCT
	M00842:287:000000000-BGGT4:1:1102:28612:16109	1	233	12	6	1	AG	TCTCTCTCTCTC	NA	1	1	4	30	291	TCGGAAGAGCTCTGATTACTTCAAATTTAGATAAATTTGGTATACAAAACTGATTATAAGTCATACTTAAGGACTTAGTTAATTAAATTGTtctctccccccAACTTAATTTCCATTGTTCTCAATGaaaaaaGGATAATAGCATAATAAATAATTACAAAGAAGGATACCTTCTAGATGTACTTGTTCATTATtgtgtgAGAGGTTCCTCCTTTGTGAGGGTGATGATtctctctctctcTTTTAttttttATTTTAttttttAGATGTGATGCTCCCTCAACTTAGCCT	TCGGAAGAGCTCTGATTACTTCA	AGGCTAAGTTGAGGGAGCAT	206	30	4	23	294	20	58.983	58.411	3.02	3.79	5.60654	F	367	AGATCGGAAGAGCTCTGATTACTTCAAATTTAGATAAATTTGGTATACAAAACTGATTATAAGTCATACTTAAGGACTTAGTTAATTAAATTGTtctctccccccAACTTAATTTCCATTGTTCTCAATGaaaaaaGGATAATAGCATAATAAATAATTACAAAGAAGGATACCTTCTAGATGTACTTGTTCATTATtgtgtgAGAGGTTCCTCCTTTGTGAGGGTGATGATtctctctctctcTTTTAttttttATTTTAttttttAGATGTGATGCTCCCTCAACTTAGCCTATaaaaaaCTaaaaaTTAGGAATTCaaaaaTAAATACATAAAATATACTGGGTTGCCTTTTAGAAGCACTAAG
	M00842:287:000000000-BGGT4:1:1102:28657:17209	1	93	26	13	1	AG	TCTCTCTCTCTCTCTCTCTCTCTCTC	NA	1	1	8	30	140	TCTTCTACATGACCGTCGGCCCTCGACGGCTCTCCATTGGCTAACACCCGtctctctctctctctctctctctctcTTCTTTCCTATAtctctcCTTCCCTCCTCTGctctctctTTTACTCTCATTCCTTCTCCTCCTT	TCTTCTACATGACCGTCGGC	AAGGAGGAGAAGGAATGAGAGT	30	42	43	20	182	22	59.545	57.927	5.54	3.24	4.52803	B	190	ctctctTTCTCtttttctctctCCTGTtctctcTTCTTCACCTCTTCTACATGACCGTCGGCCCTCGACGGCTCTCCATTGGCTAACACCCGtctctctctctctctctctctctctcTTCTTTCCTATAtctctcCTTCCCTCCTCTGctctctctTTTACTCTCATTCCTTCTCCTCCTTTTCCTCCG
	M00842:287:000000000-BGGT4:1:1102:28871:18577	1	99	34	17	1	AT	ATATATATATATATATATATATATATATATATAT	NA	1	1	3	66	216	TCGGAAGAAGTAAATGGTTTCATCAATGCTGTTAATTTAAATAGATATAAGTATAATAAATATAAACTTCaaaaaGAtttttATAATTTATTCTAatatatatatatatatatatatatatatatatatTTGGTGCCCCACCTATGCATGCCACACTTGATGATAGATTGGAGTTTAATGAGCATTCTATTTATTATGAGCATGGTGGATAAACCT	TCGGAAGAAGTAAATGGTTTCATCA	AGGTTTATCCACCATGCTCAT	70	66	4	25	219	21	58.765	57.041	3.07	2.9	10.1944	F	459	AGATCGGAAGAAGTAAATGGTTTCATCAATGCTGTTAATTTAAATAGATATAAGTATAATAAATATAAACTTCaaaaaGAtttttATAATTTATTCTAatatatatatatatatatatatatatatatatatTTGGTGCCCCACCTATGCATGCCACACTTGATGATAGATTGGAGTTTAATGAGCATTCTATTTATTATGAGCATGGTGGATAAACCTAAAATATAACAAAATTAACCAGTGTAGACACAATGtttttAGTTTGCAAGCCAATAGCCAATATTGGATAATGCTTTGCTAACCATCTTGgagagagaTTTGAATGCAACATTTCAAGCAGTTCATACCACTACTCTTATTGTGTCAACAATAATGTATCAAGATACCAACGAATAGATG…
	M00842:287:000000000-BGGT4:1:1102:4031:19517	1	138	35	13	1.5	AG	GAGAGAGAGAGAGAGAGAGAGAGAGAAGGAGGAGG	NA	1	1	2	6	124	TGCGGTAAAGTCACAATAGCTTATGCCTGTCTTAATAATCTAAAATTATGTGCGCACATGCATgagagagagagagagagagagagagaaggaggaggAGCATATGGGTGGCTATGATGGAGGT	TGCGGTAAAGTCACAATAGCTT	ACCTCCATCATAGCCACCCA	41	6	75	22	198	20	58.329	60.327	3.74	4.51	3.9981	B	215	AGATAAACATGGAAATGTTTACATGGGAATTTCCAtttttCCATTTTAtttttAACCATTTCTTTATAATTGTATGCGGTAAAGTCACAATAGCTTATGCCTGTCTTAATAATCTAAAATTATGTGCGCACATGCATgagagagagagagagagagagagagaaggaggaggAGCATATGGGTGGCTATGATGGAGGTCAAGCTGGATATGTGAC
	M00842:287:000000000-BGGT4:1:1102:5000:11762	1	106	12	6	1	AG	AGAGAGAGAGAG	NA	1	1	4	13	141	CGGACTGGGATGGTTCTAGCAACCAAAGCAAGATGCAGTGATGGAGGAAAAGTAGAAGAAAAGAGGAAAagagagGGAGCGGGGAAAGGAgggggAagagagagagagATGGCCACCAGATGGTGGCTATGTAGAGGAGGC	CGGACTGGGATGGTTCTAGC	GCCTCCTCTACATAGCCACC	76	13	10	20	150	20	59.895	59.318	3.42	4.61	0.787331	F	237	TATTGGTGGCGGACTGGGATGGTTCTAGCAACCAAAGCAAGATGCAGTGATGGAGGAAAAGTAGAAGAAAAGAGGAAAagagagGGAGCGGGGAAAGGAgggggAagagagagagagATGGCCACCAGATGGTGGCTATGTAGAGGAGGCAGATAAGGGAGAACAGgagagaGGAAAagagagagagagAAGGGaaaaaGAGGGAGGgagagaGGGCCAGCAGTGGAGTCCAGATGA
	M00842:287:000000000-BGGT4:1:1102:5569:9030	1	43	12	6	1	AG	CTCTCTCTCTCT	NA	1	1	2	4	257	GGTTGGCCACTCCTCTACTGGACCctctctctctctCACTTCACtgttgttgtCACTCATACTGACTTAAGCATTGAAGGGTCCCCACTGGAGCAATCCCTGACAAGGACTTATTTGCAGGTGTGCCACCGTCGTCTGGAGCACTAGTGACCATCTCCTCTATCTCCCACTTTGCCTCTATCGATGCCTTTACTTCCTATTCTAGTGAGACAGTAGACTCCAGCAGCAAGATTTTGGCAACAAGATGATTGATGTCT	GGTTGGCCACTCCTCTACTG	AGACATCAATCATCTTGTTGCCA	4	198	19	20	275	23	59.749	58.662	2.74	4.92	4.58852	B	441	GTAGATGGAAAGCATTGGGGTTGGCCACTCCTCTACTGGACCctctctctctctCACTTCACtgttgttgtCACTCATACTGACTTAAGCATTGAAGGGTCCCCACTGGAGCAATCCCTGACAAGGACTTATTTGCAGGTGTGCCACCGTCGTCTGGAGCACTAGTGACCATCTCCTCTATCTCCCACTTTGCCTCTATCGATGCCTTTACTTCCTATTCTAGTGAGACAGTAGACTCCAGCAGCAAGATTTTGGCAACAAGATGATTGATGTCTAATTCCTATTTTGTCTCTTATTTCtttttGATTTCTAAACATTAGTTCTAACTTATTTAAACTTAGAGTTAGCTTGTCTACTTATGGTTTTAGCCTATCTAGTTCATTTTACAGATTTAAAttt…
	M00842:287:000000000-BGGT4:1:1102:5793:15081	1	307	12	6	1	AT	ATATATATATAT	NA	1	1	5	0	182	TGACTCTAAATTGAAGGGATGCCTAAGTAAtttttttATAatatatAAATATAATAAATTATAATGGATAGAAGTTTCGACAGTAAAAtttttATTACATATTAATCAATTAATTTTAATGATAATACTGACATTATTAATATCGatatatatatatTGCGAACAGAGAACTTtatataAGC	TGACTCTAAATTGAAGGGATGCC	GCTTATATAAAGTTCTCTGTTCGCA	122	0	162	23	343	25	58.473	57.535	4.4	5.1	11.9918	F	344	GGATACAAAGGAAGGAATGGTGATGAGATCGTCGCAAGGTTCACAGAGGCAGAGATGATGGGAGTGAGGAGGGATGTGAAGAAGAGAATAAAGGGTATTGTTCTTAACTAACTTCATAAATTATTTTAAAAtttttAAACTTGAAATGTACTAAATAAAATTGACTCTAAATTGAAGGGATGCCTAAGTAAtttttttATAatatatAAATATAATAAATTATAATGGATAGAAGTTTCGACAGTAAAAtttttATTACATATTAATCAATTAATTTTAATGATAATACTGACATTATTAATATCGatatatatatatTGCGAACAGAGAACTTtatataAGCT
	M00842:287:000000000-BGGT4:1:1102:5925:8581	1	105	21	7	1	AAT	TTATTATTATTATTATTATTA	NA	1	1	4	37	258	ACCACTTATGATTGAGCATGTTGGTATGTGTATCtatatataTTTTATAAAATATTTATTTttattattattattattattaTACTTGGGtttttAAAATAAGTCTAACATGTGAGTCAACATGTTTTCTTGTCTTGTGCAGAATGAGTGTCATAGATGGGGTCCTAATTATGCACCATGGTGGAGTTTTGCACACTGACCCACATGTTTATTATGAAGGAGGTAGTGTTCAAAGATTTAGTGTTGAGGTTGATAGCT	ACCACTTATGATTGAGCATGTTGG	AGCTATCAACCTCAACACTAAATCT	37	151	44	24	301	25	59.6	58.048	3.77	2.4	11.3522	F	380	ATAATAAACTTAAGGAATACAatatatatatatatatatAGTAACCACTTATGATTGAGCATGTTGGTATGTGTATCtatatataTTTTATAAAATATTTATTTttattattattattattattaTACTTGGGtttttAAAATAAGTCTAACATGTGAGTCAACATGTTTTCTTGTCTTGTGCAGAATGAGTGTCATAGATGGGGTCCTAATTATGCACCATGGTGGAGTTTTGCACACTGACCCACATGTTTATTATGAAGGAGGTAGTGTTCAAAGATTTAGTGTTGAGGTTGATAGCTTTAATTATTAAGAtttttACTACATGGTGATTAAAGATTTAGGCTATCCAAGCTTTAAAGAAATACTTTACAAGATTCC
	M00842:287:000000000-BGGT4:1:1102:6407:16041	1	91	28	14	1	AG	GAGAGAGAGAGAGAGAGAGAGAGAGAGA	NA	1	1	4	8	291	ACTGCCTCCTTGCTATGCTGTGCAAAATgagagagagagagagagagagagagagaAATCTTCAAAGAGCAAGGGAGGCAAGAGTTTgggggAGAAACATCGGgagagagaAAGGGAGGGTACTATGGACAATTgagagaGgagagagaTTAGGAGGCGAGCAAGGGGAAGGTGTTGTTGGGGAAAGAGATAGGAGGGAAATCAagagagagTGGCAAAGATGGCCTTTGTtgtgtgGGGGTTGTTAGGCTTGGGATTGGCTAGGCCAGGTCAGGCTCTGGTCTTGCTTCA	ACTGCCTCCTTGCTATGCTG	TGAAGCAAGACCAGAGCCTG	8	215	63	20	353	20	60.107	59.964	4.41	4.85	0.143193	F	357	CCAAATCTGGTATCCTGTTCTACATAAGAAAGGAAACAAGGGGCCTAGCTGCGCCACTATCTACTGCCTCCTTGCTATGCTGTGCAAAATgagagagagagagagagagagagagagaAATCTTCAAAGAGCAAGGGAGGCAAGAGTTTgggggAGAAACATCGGgagagagaAAGGGAGGGTACTATGGACAATTgagagaGgagagagaTTAGGAGGCGAGCAAGGGGAAGGTGTTGTTGGGGAAAGAGATAGGAGGGAAATCAagagagagTGGCAAAGATGGCCTTTGTtgtgtgGGGGTTGTTAGGCTTGGGATTGGCTAGGCCAGGTCAGGCTCTGGTCTTGCTTCAGGTT
	M00842:287:000000000-BGGT4:1:1102:6769:7340	1	103	25	5	1	AAGCT	AAGCTAAGCTAAGCTAAGCTAAGCT	NA	1	1	6	4	103	TCCTTTCACACTGGATCTCACAACTTTATAAATAGGAcccccAGCCATgggggCaagctaagctaagctaagctaagctAAGCAAAGCAAAGCGAGCAAGCAA	TCCTTTCACACTGGATCTCACA	TTGCTTGCTCGCTTTGCTTT	32	4	49	22	151	20	59.028	59.897	3.58	3.51	3.07486	F	180	CTCCTAACTAAGTCTGTTAAGCTGTTAAATGCTCCTAATAGTATTTATTCCTTTCACACTGGATCTCACAACTTTATAAATAGGAcccccAGCCATgggggCaagctaagctaagctaagctaagctAAGCAAAGCAAAGCGAGCAAGCAAACCTCGAGCAATCAAACATAGCTCCTGGA
	M00842:287:000000000-BGGT4:1:1102:6865:20381	1	87	10	5	1	AG	AGAGAGAGAG	NA	1	1	5	8	146	ACATCGACTATAGATATCCACCTCAATTGAGACagagagagagGAGTTAAACTTCTCCCTCCTTGGGTACTTATCTTATCTAATGAAGGAAACCTAAAGGAGACTGAAACAATGAAGAAAACCTTGAGAGGTGACTAAGAGAACTT	ACATCGACTATAGATATCCACCTCA	AAGTTCTCTTAGTCACCTCTCAAGG	8	78	54	25	199	25	58.278	59.755	3.86	3.61	11.9674	A	222	CTAAATGTACTAAGGTCATCCTCTTTTACTATTGACCTAATATGTTTTGGAGGACATCGACTATAGATATCCACCTCAATTGAGACagagagagagGAGTTAAACTTCTCCCTCCTTGGGTACTTATCTTATCTAATGAAGGAAACCTAAAGGAGACTGAAACAATGAAGAAAACCTTGAGAGGTGACTAAGAGAACTTTAACaaaaaCTCTAAGAGCTTCG
	M00842:287:000000000-BGGT4:1:1102:7180:17275	1	50	15	5	1	AAC	TGTTGTTGTTGTTGT	NA	1	1	4	21	225	AGATCCATATAGCCAAACCCACTTAGTAGAATAAAGGCTTGTGCtgttgttgttgttgtTATAGTCTCATAGATTATAAAatatatCTTGAATATACTATTTAGATATTACATCATGTATACTCCATAGTCCATAATCCATTTTATGATACGACTTTTAAATTACTTATTACTATTAAGACTTGAATATTAAAATTAGTAAGCTTGTTATTGGAGTTTATGGAAT	AGATCCATATAGCCAAACCCACT	ATTCCATAAACTCCAATAACAAGCT	21	141	6	23	230	25	59.017	57.039	4	3.74	11.9447	B	356	TAGAAAGATCCATATAGCCAAACCCACTTAGTAGAATAAAGGCTTGTGCtgttgttgttgttgtTATAGTCTCATAGATTATAAAatatatCTTGAATATACTATTTAGATATTACATCATGTATACTCCATAGTCCATAATCCATTTTATGATACGACTTTTAAATTACTTATTACTATTAAGACTTGAATATTAAAATTAGTAAGCTTGTTATTGGAGTTTATGGAATTTAAAATAAGAGGCTAAtttttGCTTTCTTACAACCatatatTAAAATCATACCCTTGGTTCTTTTATAAGGCATTCTAAATAAGGTAATAATAGAATTGATAGGTAGTACATAAATATCACGAAT
	M00842:287:000000000-BGGT4:1:1102:7266:13971	1	220	77	7	2	AG	AGAGAGAGAGAGAGAAAGGATAGAAATTTTTTCTCTCTTCTGTTCCTTCTTTTTCTCTCTCTCTTTCTCTCTCTCTC	NA	1	1	4	60	238	TCAGGGTCCTTACACTAGGGTTTAACTCAACTAgtgtgtTAGGTCAACAAGCCTTTTACTAGACCTTAATTCTTCttttttagagagagagagagAAAGGATAGAAAttttttctctctTCTGTTCCTTCTTTTtctctctctcTTtctctctctctcTTCTTCTCTTTCttcttttcttttcttCtttttCTTCTTTTATTTCctttctttctttTCCCTTCTTCTCCTTTGGCCGA	TCAGGGTCCTTACACTAGGGT	TCGGCCAAAGGAGAAGAAGG	60	60	139	21	376	20	59.279	59.675	4.34	3.46	2.04548	G	429	AGCCTAGCAGCCCGGTTAGTCAGTTAGAGGCTTGCTCAAGATCCAAGGGCTTACTAGGTTCCTAAAATGATGAGTTTCAGCAACACTCATCAGGGCTGGGGTGGTTGGTCCGACTAGTGGCCCAAGCCTCGAGGTGGTTCAGGGTCCTTACACTAGGGTTTAACTCAACTAgtgtgtTAGGTCAACAAGCCTTTTACTAGACCTTAATTCTTCttttttagagagagagagagAAAGGATAGAAAttttttctctctTCTGTTCCTTCTTTTtctctctctcTTtctctctctctcTTCTTCTCTTTCttcttttcttttcttCtttttCTTCTTTTATTTCctttctttctttTCCCTTCTTCTCCTTTGGCCGAATAGGGGAGATGACTTccccccG…
	M00842:287:000000000-BGGT4:1:1102:7278:14536	1	153	20	10	1	AG	CTCTCTCTCTCTCTCTCTCT	NA	1	1	4	6	201	GACACCGGCGTTTGTCCCCAGTGACCATCGTTGCCCCTGGAGCAATGCTGGAGGCTAGGAAGAGGGCCAGAGGCTAGGAAGAGGACCAAAGCAATGTCGGAGGCTGGGAATAGTGGGAAGAAGATACTGAGCCTATCCTTTCTTCCTCCTCActctctctctctctctctctTGATTTCTTTCTTTATTGTCATCCCTGGG	GACACCGGCGTTTGTCCC	CCCAGGGATGACAATAAAGAAAG	134	6	1	18	201	23	61.351	57.158	4.46	2.62	9.19337	A	233	GACACCGGCGTTTGTCCCCAGTGACCATCGTTGCCCCTGGAGCAATGCTGGAGGCTAGGAAGAGGGCCAGAGGCTAGGAAGAGGACCAAAGCAATGTCGGAGGCTGGGAATAGTGGGAAGAAGATACTGAGCCTATCCTTTCTTCCTCCTCActctctctctctctctctctTGATTTCTTTCTTTATTGTCATCCCTGGGctctctGGTGGCCACTGCGGCCATCACGAGCT
	M00842:287:000000000-BGGT4:1:1102:7504:19508	1	156	18	9	1	AT	ATATATATATATATATAT	NA	1	1	4	47	187	AGCCATAATTGACCCGTAACTAGTTTTGAAAGAGACTAACTCTTGCCTATAACATACTATCAATCATCatatatatatatatatatCCATGATCGCTCCACTGaaaaaGGACCCATGAGGAAATTAGCTATGAAATCTTATGGACAatatatTTATAACAATATGTATGAGTGATCATGCCAATAGA	AGCCATAATTGACCCGTAACT	TCTATTGGCATGATCACTCATACA	47	77	88	21	274	24	57.074	57.576	2.24	2.29	10.3498	F	317	AGTTGATCCATATTAACTACATATAGCCTTTTATTTGAAATAAAAGAATCATTCTTGGATCCtttttttCCTAGTCTTTATGACTATAGCCATAATTGACCCGTAACTAGTTTTGAAAGAGACTAACTCTTGCCTATAACATACTATCAATCATCatatatatatatatatatCCATGATCGCTCCACTGaaaaaGGACCCATGAGGAAATTAGCTATGAAATCTTATGGACAatatatTTATAACAATATGTATGAGTGATCATGCCAATAGAATGGCTCAATAGGAGATACTAGATCCTGAATCCATATAATCAT
	M00842:287:000000000-BGGT4:1:1102:7537:12739	1	160	15	5	1	AAG	TTCTTCTTCTTCTTC	NA	1	1	3	25	210	AGTCATAGTCAGCCAGTCTTGGCGTATATGATAACAGTAGTGGATATCATTTTCTAATTTATTAATCACTGTTTTGATTGATTACATAGCTTTCATAGTTGACCCCACGTACACCCTATTAAAGGGGACCCAACTCTGAGAACAGGGAGGttcttcttcttcttcCCCAGAAAGAAAAGAGATATGCTCTGAACTCACATGAGCCCTCCC	AGTCATAGTCAGCCAGTCTTG	GGGAGGGCTCATGTGAGTTC	129	25	10	21	219	20	57.116	60.107	3.02	3.01	3.99129	A	258	GATAGAGATAGTCATAGTCAGCCAGTCTTGGCGTATATGATAACAGTAGTGGATATCATTTTCTAATTTATTAATCACTGTTTTGATTGATTACATAGCTTTCATAGTTGACCCCACGTACACCCTATTAAAGGGGACCCAACTCTGAGAACAGGGAGGttcttcttcttcttcCCCAGAAAGAAAAGAGATATGCTCTGAACTCACATGAGCCCTCCCTTCCTTCTTTTCTctactactactaTTGTTCATCTTGCC
	M00842:287:000000000-BGGT4:1:1102:7850:26167	1	240	12	6	1	AG	GAGAGAGAGAGA	NA	1	1	2	88	289	CCTAAGATCCAGGTCCAGCGTCGACCCAACTTGTGCAGTCTTATGTGTCATCATGAGAATTACTTTGTGCACCAGAGAATGTGCGGCGCTGTCTAATCTAGCACATTTATCAAAATAATAAGAAAATCACCTAGTTTTGATAAGAAAATTGGATACTTTCTTAATgagagagagagaTTACTTTCCTAATAAGAAAATTTTGTCTGCTATATGAAATAACAATTTTATTTAGGaaaaaCTCCAATGTGTTCAAAATCTTGGATTATGCATCCTGAATATTTGGACTTGC	CCTAAGATCCAGGTCCAGCG	GCAAGTCCAAATATTCAGGATGCA	145	88	75	20	363	24	59.609	59.902	5.18	3.96	4.48921	F	408	GTGATATTAATCAAATtatatatatataAAGAAGTTTCTGAATGATAGGTCGGCTTTGATGGCTGCGAAGGTTTCCTAAGATCCAGGTCCAGCGTCGACCCAACTTGTGCAGTCTTATGTGTCATCATGAGAATTACTTTGTGCACCAGAGAATGTGCGGCGCTGTCTAATCTAGCACATTTATCAAAATAATAAGAAAATCACCTAGTTTTGATAAGAAAATTGGATACTTTCTTAATgagagagagagaTTACTTTCCTAATAAGAAAATTTTGTCTGCTATATGAAATAACAATTTTATTTAGGaaaaaCTCCAATGTGTTCAAAATCTTGGATTATGCATCCTGAATATTTGGACTTGCATAAATATTCGTGCTTTGTAAATGCTATCTAATAAT…
	M00842:287:000000000-BGGT4:1:1102:8166:16577	1	150	10	5	1	AG	CTCTCTCTCT	NA	1	1	2	28	193	CGCCTTTGGAGCCCTTGTTTTGAACGAACGAGGGGCGCTTCTTCTCCGGAAGGTTGCATGACCCTCGGCTAGCCTCCATCAAAGACTTTGGTGGCCTCCAAGATGACCTtctctctcTTtctctcTTGccccccctctctctctTCCTTTCTCGTGTCTGTTCTCCTGTTCTCCGCCTCCTCTATGTAGATGC	CGCCTTTGGAGCCCTTGTTT	GCATCTACATAGAGGAGGCGG	114	28	16	20	208	21	61.464	59.796	2.83	6.13	2.66708	F	216	AtttttAAGGGGCTTCGCCTTTGGAGCCCTTGTTTTGAACGAACGAGGGGCGCTTCTTCTCCGGAAGGTTGCATGACCCTCGGCTAGCCTCCATCAAAGACTTTGGTGGCCTCCAAGATGACCTtctctctcTTtctctcTTGccccccctctctctctTCCTTTCTCGTGTCTGTTCTCCTGTTCTCCGCCTCCTCTATGTAGATGCTGACCCTT
	M00842:287:000000000-BGGT4:1:1102:8405:23511	1	207	15	5	1	ATC	CATCATCATCATCAT	NA	1	1	2	46	251	CCTAAAGTTGCCGGCTCTGATTGAGCCGAGCCGCCGCTGCCACGTTCGCCGCCATGCCCTGCGGATGCGTGGCCATGCCCGGTCTGTTCCGCACCTCCGCTCCGATCACCCGATCCGCGTCCTCCGGAGTCACCACCTTGTCCGCTGGAAGCTtcgtcgtcgCATCCTACcatcatcatcatcatCACCATATCACAGTGTGATACAACagagagCCTATAGGTTAAAACCCACTGATGGCGGTCGAAGAA	CCTAAAGTTGCCGGCTCTGA	TTCTTCGACCGCCATCAGTG	150	46	37	20	287	20	60.036	60.39	3.27	3.66	0.426205	B	384	TATCTCTTTCACTATGAAGGCTGAAACCGTTTTAAGCCTAAAGTTGCCGGCTCTGATTGAGCCGAGCCGCCGCTGCCACGTTCGCCGCCATGCCCTGCGGATGCGTGGCCATGCCCGGTCTGTTCCGCACCTCCGCTCCGATCACCCGATCCGCGTCCTCCGGAGTCACCACCTTGTCCGCTGGAAGCTtcgtcgtcgCATCCTACcatcatcatcatcatCACCATATCACAGTGTGATACAACagagagCCTATAGGTTAAAACCCACTGATGGCGGTCGAAGAATACTTACAGCGAGAACATCTCTGAGCTTGACCTTGTCCTCGTCGCGCATCACGCGGGCGTTGGCGGTCGCTGCCGACTGCGCCTCGGCGGCAACACC
	M00842:287:000000000-BGGT4:1:1102:8624:12810	1	56	10	5	1	AT	TATATATATA	NA	1	1	5	27	245	GCACATTAATTGCCATTTGGTGTTGGtttttCTTTaaaaaaGTTAGCAGGtatatatataGAGCAAATTGTGAGGCTGCATGGAGTTCCAATAATCATTATGTCTAATCGGGATAGTAGACTTGTATCTCAATTCTGAAAGAGTCTTTATAAAGCACCTGGTGCCGAATTGAGCTTCAATATTGGTTTTCATACACAAACCAATATGCTGAGAGCCTGTGTTATGGACTTGGATGATGCATGGGA	GCACATTAATTGCCATTTGGTGT	TCCCATGCATCATCCAAGTCC	27	164	6	23	250	21	58.998	60.134	4.16	3.85	5.13602	F	300	AATTTGCACATTAATTGCCATTTGGTGTTGGtttttCTTTaaaaaaGTTAGCAGGtatatatataGAGCAAATTGTGAGGCTGCATGGAGTTCCAATAATCATTATGTCTAATCGGGATAGTAGACTTGTATCTCAATTCTGAAAGAGTCTTTATAAAGCACCTGGTGCCGAATTGAGCTTCAATATTGGTTTTCATACACAAACCAATATGCTGAGAGCCTGTGTTATGGACTTGGATGATGCATGGGATAACCACTTCGCATTAATTAAGTTTGCATataataataGTTATTAAGCTA
	M00842:287:000000000-BGGT4:1:1102:9132:26247	1	226	44	11	1.5	AG	TCTCTCTCTCTCTCTCTCTCTCTATATATATATATATCTCTCTC	NA	1	1	2	14	122	ACCCTAGCCTTACCTCCACAGGATTTCTCTGGTTTGCAGGAAAAtctctctctctctctctctctctatatatatatatatctctctcATATaaaaaGCTGTTACCTGGACGCATGGTGTTC	ACCCTAGCCTTACCTCCACA	GAACACCATGCGTCCAGGTA	24	14	182	20	303	20	59.584	60.037	4.17	3.08	0.452995	F	317	CTGGAAGTTTCCCGCGTGTCGAGTGTACTGCAGCCCTAAAAGTCCCGCACGCAGATTGACTTCTTGGTCGGTGCTAATGGACCCTCGTCTCTTCCGTGCTCCAGATCAAAGTCGCAGTCCAACCATGACACGAAAATGTTTGGTTCCATCGCCAGATTTCATAAATGGGTTGGCATTTGATACCCTAGCCTTACCTCCACAGGATTTCTCTGGTTTGCAGGAAAAtctctctctctctctctctctctatatatatatatatctctctcATATaaaaaGCTGTTACCTGGACGCATGGTGTTCGATGTTTGTTGCAT
	M00842:287:000000000-BGGT4:1:1102:9405:16774	1	63	26	7	1.5	AT	TATATATATATGTATATATATATATA	NA	1	1	6	37	257	ACTATCTTAGTGATTGGACAGTCCACTCTTGATATTATTTGatatatatAATGTAGTGGGCtatatatataTGtatatatatatataTTCTAACTTTGATATGATTTATGTATGTGATCCATATGCATTATGTTTTATTAGCTGTGCATATTATACTTAATATTTAGTAAAGATTTTGGTAACTTATTTGGtttttAAATGCTCATCTCCATtctctctttttATATTTATAGATATACCTCTAAGGCAAGGCACAA	ACTATCTTAGTGATTGGACAGTCC	TTGTGCCTTGCCTTAGAGGT	37	150	2	24	258	20	57.527	59.229	3.85	3.85	7.24381	F	285	GACTATCTTAGTGATTGGACAGTCCACTCTTGATATTATTTGatatatatAATGTAGTGGGCtatatatataTGtatatatatatataTTCTAACTTTGATATGATTTATGTATGTGATCCATATGCATTATGTTTTATTAGCTGTGCATATTATACTTAATATTTAGTAAAGATTTTGGTAACTTATTTGGtttttAAATGCTCATCTCCATtctctctttttATATTTATAGATATACCTCTAAGGCAAGGCACAAAATAGTGAGAGGATAGTCCTTAttttt
	M00842:287:000000000-BGGT4:1:1102:9855:15388	1	49	10	5	1	AG	CTCTCTCTCT	NA	1	1	4	5	90	GTCATCATGTTATCTTTCCTCTCCCCTCTCctctctctctCACGCAACCATTATCACGGTATTGCCCATGCCTGCAGAGAACTCCTGTGG	GTCATCATGTTATCTTTCCTCTCCC	CCACAGGAGTTCTCTGCAGG	5	30	19	25	108	20	59.005	60.037	4.3	4.85	6.03125	A	240	TTCTCCAGaaaaaCTATAGTCATCATGTTATCTTTCCTCTCCCCTCTCctctctctctCACGCAACCATTATCACGGTATTGCCCATGCCTGCAGAGAACTCCTGTGGaaaaaGCACATCCTGTAGCATCCATCACAAGGCAtgtgtgCTGTTTTACGAAGAAGGAAGTGGCTATTCCTTTGAAAATCCACAAGGACATGGTCAAGGCATTGAAGGGAGAAAATGGGCATGATAACTTTT
	M00842:287:000000000-BGGT4:1:1103:10341:5712	1	123	10	5	1	AT	TATATATATA	NA	1	1	2	47	150	TgagagaTGACACGTGGCACAATCTGAagagagAAAGCTGAAGCATCCTTCCATCCCGCTCATTGGTTATCTCtatatatataGGGCTTAAGGAAGGCTGAGTCCCTGCACAACTTCTTCGATATCATGGTGTGGAATTTCCCGCTCTCC	TGAGAGATGACACGTGGCAC	GGAGAGCGGGAAATTCCACA	53	47	50	20	199	20	60.038	60.035	5.01	4.17	0.07369	F	326	GATGTTAGTGATGATGTTGGTTTGACTCTGTTAACTGATGAGGTCATGCTgagagaTGACACGTGGCACAATCTGAagagagAAAGCTGAAGCATCCTTCCATCCCGCTCATTGGTTATCTCtatatatataGGGCTTAAGGAAGGCTGAGTCCCTGCACAACTTCTTCGATATCATGGTGTGGAATTTCCCGCTCTCCCttttttGGgtgtgtTGTGCCAAAATGATAGGAGGAGAGGTTGCTTATTTGCAATTCACCCATTCATGATTTCCAAGGAGGCATCCAGTTCTAAGCATAGGAAGAATTTTGCGCGGGGTGCTGTTTG
	M00842:287:000000000-BGGT4:1:1103:10664:6122	1	136	10	5	1	AG	GAGAGAGAGA	NA	1	1	3	8	141	GCCAACAGGCTCAGTGACAAGATTCACAAACACAAACCAAATGGATAATAGCTAATGTCTTTAAACATCAAATGCATAACCATGGAAATGGGAGGCACAGCgagagagagaACATACCTGCAATCTTCTATGAGGCGAAGC	GCCAACAGGCTCAGTGACA	GCTTCGCCTCATAGAAGATTGC	82	8	35	19	175	22	60.228	59.777	3.58	3.56	3.45085	A	224	ATCATTCTTTGTCTTGCTTCAAGGATTACAACAAGCCAACAGGCTCAGTGACAAGATTCACAAACACAAACCAAATGGATAATAGCTAATGTCTTTAAACATCAAATGCATAACCATGGAAATGGGAGGCACAGCgagagagagaACATACCTGCAATCTTCTATGAGGCGAAGCaaaaaGAGGGAGAAGGTGGCGAGAAGGCAGAGAATGGATGAGATTCTTT
	M00842:287:000000000-BGGT4:1:1103:10799:27250	1	145	15	5	1	AGG	AGGAGGAGGAGGAGG	NA	1	1	2	39	212	AGTCTTGTCCATAGACTCTAGGCTTTTAGAGTGGTTCCttttttttATTggggggAGACAATTGTAAATGCCTGccccccTACTTGGCGCACCAACCTATTATCGGATTCTTGACATGGTCTGCTATCTCATCGGAACaggaggaggaggaggCATCGAtggtggtggTGCAGAGGGAGAATGGAGTCATCGATGATTCGAGCGATGGAGCC	AGTCTTGTCCATAGACTCTAGGC	GGCTCCATCGCTCGAATCAT	115	39	7	23	218	20	58.788	60.32	3.93	2.45	4.53217	F	225	AGCTTTAGTCTTGTCCATAGACTCTAGGCTTTTAGAGTGGTTCCttttttttATTggggggAGACAATTGTAAATGCCTGccccccTACTTGGCGCACCAACCTATTATCGGATTCTTGACATGGTCTGCTATCTCATCGGAACaggaggaggaggaggCATCGAtggtggtggTGCAGAGGGAGAATGGAGTCATCGATGATTCGAGCGATGGAGCCTCACCTG
	M00842:287:000000000-BGGT4:1:1103:11099:7674	1	112	10	5	1	AG	AGAGAGAGAG	NA	1	1	6	74	245	TGGAGGACCAAAGTAGGGAGTTTGGAGGAGTAGGAAGGTTGCTCACGGGTGAGGGAATGGCCACAGTGAGAAACCATGAGCAGGGAGGTTCCACagagagagagGAGAATGGAGAAGGAAGgagagaATAGAAGACAGGAGTCGAGGAAGGAAACCAGGAGTTCTGAGAgggggCTACCATCCGGGTCATCTTCCAGGAAGAGGCAAACCCAATCAGAAGGAGTAGACGAGGAAGAACCACCTCC	TGGAGGACCAAAGTAGGGAG	GGAGGTGGTTCTTCCTCGTC	74	121	18	20	262	20	58.047	59.753	4.3	4.2	2.19953	F	267	GCATCAATCAgggggATTGGAGGACCAAAGTAGGGAGTTTGGAGGAGTAGGAAGGTTGCTCACGGGTGAGGGAATGGCCACAGTGAGAAACCATGAGCAGGGAGGTTCCACagagagagagGAGAATGGAGAAGGAAGgagagaATAGAAGACAGGAGTCGAGGAAGGAAACCAGGAGTTCTGAGAgggggCTACCATCCGGGTCATCTTCCAGGAAGAGGCAAACCCAATCAGAAGGAGTAGACGAGGAAGAACCACCTCCGGGTC
	M00842:287:000000000-BGGT4:1:1103:11213:26879	1	120	12	6	1	AT	TATATATATATA	NA	1	1	4	30	146	TTGGATCTTCGTCCCAGTGCACGAAAAGTGTTGACCAATCATGTGGCCCGGGTTTGTTTAGTGCTTTATTGATCTTGTTTCTATtatatatatataCTGTTATATTTGTCTTTAATAAGTCAGTTCCTGTAGGCCTCGTGCAAACT	TTGGATCTTCGTCCCAGTGC	AGTTTGCACGAGGCCTACAG	64	30	36	20	181	20	60.036	60.321	4.4	2.74	0.357159	A	184	CTTGTGTATATGtatataTGTGAAATTTGAGAATTTTGGATCTTCGTCCCAGTGCACGAAAAGTGTTGACCAATCATGTGGCCCGGGTTTGTTTAGTGCTTTATTGATCTTGTTTCTATtatatatatataCTGTTATATTTGTCTTTAATAAGTCAGTTCCTGTAGGCCTCGTGCAAACTTTG
	M00842:287:000000000-BGGT4:1:1103:12424:18323	1	187	18	9	1	AT	ATATATATATATATATAT	NA	1	1	2	36	221	TGACTGTTTGGATTGCACGCGCAGCCAAGATTTATGAGGCCTATGGACTAGGAACGGTAGATAGGATCAAGACAGCAATCTTGGGTAGCTTTTCCAGGATTGAGGACAAGACCCTTGGAAATTGAAAATTAGCGGAGTGGCGCATGAatatatatatatatatatttttttttCCTCTCATGTTGGTGTTTGAACACGGCGGCGTTATCTCACACTGCCCA	TGACTGTTTGGATTGCACGC	TGGGCAGTGTGAGATAACGC	127	36	40	20	260	20	59.689	60.391	5.34	4.84	0.701673	F	302	ATCTTGGATGTCATCATTATCTTGTATCTCCTTCGAGATTGACTGTTTGGATTGCACGCGCAGCCAAGATTTATGAGGCCTATGGACTAGGAACGGTAGATAGGATCAAGACAGCAATCTTGGGTAGCTTTTCCAGGATTGAGGACAAGACCCTTGGAAATTGAAAATTAGCGGAGTGGCGCATGAatatatatatatatatatttttttttCCTCTCATGTTGGTGTTTGAACACGGCGGCGTTATCTCACACTGCCCACCCTCTTTGGTCTCTGTTTAGGAAAGTCCATTAGTATAAAGG
	M00842:287:000000000-BGGT4:1:1103:12972:17558	1	187	22	11	1	AG	CTCTCTCTCTCTCTCTCTCTCT	NA	1	1	2	12	230	TCACTACCAGACGGTTGCACCCTTACACGGTTAATTATCCCTACTACTCAACTACCACATCATCGCTGTATGCCCCAAACGGAAAATATTCTTTTCGTACTCTCCGGCTCACTCtatataAAGGAGACTCTCCATCATCCCAAAAGGCTAAGTCACTCATACACAATTTTGAGctctctctctctctctctctctTTTCTTTACAACTGCTGTTGCCTATCTTACTGACT	TCACTACCAGACGGTTGCAC	AGTCAGTAAGATAGGCAACAGCA	153	12	14	20	243	23	59.967	59.484	4.57	4.41	3.54846	B	250	TAGGAAGTCATAGTCACTACCAGACGGTTGCACCCTTACACGGTTAATTATCCCTACTACTCAACTACCACATCATCGCTGTATGCCCCAAACGGAAAATATTCTTTTCGTACTCTCCGGCTCACTCtatataAAGGAGACTCTCCATCATCCCAAAAGGCTAAGTCACTCATACACAATTTTGAGctctctctctctctctctctctTTTCTTTACAACTGCTGTTGCCTATCTTACTGACTTGATCGT
	M00842:287:000000000-BGGT4:1:1103:13217:8801	1	128	10	5	1	AG	GAGAGAGAGA	NA	1	1	2	0	160	AGATCGGAAAGCAAGGACCaaaaaGATGCTTGTTAACTCCAAAAttttttCAGACTGCCTCATGACATGATCCGAGCCCATCGAAATGTATAAAtgctgctgcACAACCATTTGATTTAGGGAGGgagagagagaGGTTATGAGGACATTCAATGGATAG	AGATCGGAAAGCAAGGACCA	CTATCCATTGAATGTCCTCATAACC	105	0	3	20	162	25	59.016	57.321	4.02	2.85	8.66318	F	162	GTAGATCGGAAAGCAAGGACCaaaaaGATGCTTGTTAACTCCAAAAttttttCAGACTGCCTCATGACATGATCCGAGCCCATCGAAATGTATAAAtgctgctgcACAACCATTTGATTTAGGGAGGgagagagagaGGTTATGAGGACATTCAATGGATAG
	M00842:287:000000000-BGGT4:1:1103:13357:18271	1	251	10	5	1	AT	ATATATATAT	NA	1	1	7	32	142	ACGATCTACATGGCCATACGTGTCATCCAGCTAGGTGTACCATGTCAAAAgggggggTTTAACCCCGCATCATATACAAatatatatatTATtatataGACATATTAGATACTGATGATTATGATTGCTTGGACTGTGGTTT	ACGATCTACATGGCCATACGT	AAACCACAGTCCAAGCAATCA	58	32	172	21	313	21	59.039	58.335	3.57	2.57	4.62656	F	367	ATGCTAGTTCGCCCGATGAGAATGGGCAGTTAGCATCCGATCTGCTAGGTAGCTCAGGCGCTTCAACGATCTGGCTGACTTTGGATGTTCAAAGTTGAACACGATGAGTTCGGTGGGTGATTCCTAGGGTAATGATCTAGTGGGATTCATCTTTAGAGTTCTACCATAGTTACGATCTACATGGCCATACGTGTCATCCAGCTAGGTGTACCATGTCAAAAgggggggTTTAACCCCGCATCATATACAAatatatatatTATtatataGACATATTAGATACTGATGATTATGATTGCTTGGACTGTGGTTTTGGTTGCTTAGAACATGGTACTAAGTATCTTAGAATTTGGGTATGAAATATAAT
	M00842:287:000000000-BGGT4:1:1103:13820:3167	1	141	18	6	1	AAT	TTATTATTATTATTATTA	NA	1	1	2	38	138	GGAGCCCATCATTAAGATAAGGGCTATAAttttttttAtttttATtatatatttttATTTATttattattattattattaAAAtttttttAAGGAGCATGAAAGTAAATATTGGGTTGCCTCCCAACAAGCGCTAAGT	GGAGCCCATCATTAAGATAAGGG	ACTTAGCGCTTGTTGGGAGG	39	38	79	23	216	20	58.406	60.322	3.95	4.3	4.91561	F	314	GTATAAATAATTGAAAGAAATAAATATAAACCATAAGAACaaaaaGAAATAGATAAGGCTAGAAGTGACATGAGAAGAGGAGCCCATCATTAAGATAAGGGCTATAAttttttttAtttttATtatatatttttATTTATttattattattattattaAAAtttttttAAGGAGCATGAAAGTAAATATTGGGTTGCCTCCCAACAAGCGCTAAGTTTAACGTCTTAGCTGGACTTAATGCTGAAGGCAGATTACCCGAGATATACTAGTTTATAGAGAACCATGGCTTCCTTAATAAGTTCTTTGGGTAGTTC
	M00842:287:000000000-BGGT4:1:1103:14143:15719	1	126	10	5	1	AG	CTCTCTCTCT	NA	1	1	6	5	133	TATCTTTCCCATTcgcgcgaaaaaTTCCAAATCCTcccccAAATCCCTCGAGACCCCGATCCcctcctcctctctctCCTCAAtctctcCTCTGCCctctctctctATCTTCTCCATTCGTTGTTCTACTCCC	TATCTTTCCCATTCGCGCGA	GGGAGTAGAACAACGAATGGAG	76	5	30	20	162	22	59.897	58.477	5.87	3.86	3.62594	F	183	ATAAAGGTACTTTAAAATCCaaaaaTCTCTATCTTTCCCATTcgcgcgaaaaaTTCCAAATCCTcccccAAATCCCTCGAGACCCCGATCCcctcctcctctctctCCTCAAtctctcCTCTGCCctctctctctATCTTCTCCATTCGTTGTTCTACTCCCCTCATTTCTCTTGTTTAATCA
	M00842:287:000000000-BGGT4:1:1103:15719:21304	1	85	14	7	1	AG	AGAGAGAGAGAGAG	NA	1	1	5	0	300	GTTAGGGATTCATACTTGAGAAGGAagagagagagagagGGCAAGACGAGGGTTTGTAAAATGGCGAAAGAGCTCCGTCGGTCATCGGTCGGCGGTCGTCAGTCGTCGATTGGCGATCCGCAGGGGTTAGGGATTAGAAGGAagagagagCgagagagaCGGTGAGACGAGGGTTTGTGAGGTGAAAGAGctctctCGGGCaaaaaaGTCCACTCACtttttttCttttttCTTTTGATATTGCCCCTGGGGATAAGTggggggATAAGGGGCCttttttCCTTATCCCTTCCTACTTgg	GTTAGGGATTCATACTTGAGAAGGA	CCAAGTAGGAAGGGATAAGGAAA	0	238	60	25	359	23	57.874	57.29	3.36	3.13	12.8362	F	370	AAAGAGCTCCGTCGGTTGTCAGTCGTTGGTCGTCAGTCGTCAGTTGGCGATCCACAAGGGTTAGGGATTCATACTTGAGAAGGAagagagagagagagGGCAAGACGAGGGTTTGTAAAATGGCGAAAGAGCTCCGTCGGTCATCGGTCGGCGGTCGTCAGTCGTCGATTGGCGATCCGCAGGGGTTAGGGATTAGAAGGAagagagagCgagagagaCGGTGAGACGAGGGTTTGTGAGGTGAAAGAGctctctCGGGCaaaaaaGTCCACTCACtttttttCttttttCTTTTGATATTGCCCCTGGGGATAAGTggggggATAAGGGGCCttttttCCTTATCCCTTCCTACTTggggggATAGAAT
	M00842:287:000000000-BGGT4:1:1103:17601:12659	1	55	10	5	1	AT	TATATATATA	NA	1	1	3	12	115	TCCCTGTGGATTTGACCCTGATTCACCCTCTTtatatatataTTTTGAGTTAGGCTTAtttttGACTGCCTATGACAACGATCAAATTTTAGCACCATTCTGAAGATCTTAGCAC	TCCCTGTGGATTTGACCCTG	GTGCTAAGATCTTCAGAATGGTGC	12	49	23	20	137	24	59.302	59.965	4.45	5.01	4.73321	F	156	AtttttAACCAAttttttAAAATCCCTGTGGATTTGACCCTGATTCACCCTCTTtatatatataTTTTGAGTTAGGCTTAtttttGACTGCCTATGACAACGATCAAATTTTAGCACCATTCTGAAGATCTTAGCACAATTGTTaaaaaTaaaaaa
	M00842:287:000000000-BGGT4:1:1103:18106:17569	1	166	25	5	1	AAAAG	AAAAGAAAAGAAAAGAAAAGAAAAG	NA	1	1	4	15	119	TGTCCTCCCACACCAAGGTAAAATGCTAAAATTTACTCTCCTGCACCAAATGCACCTCAaaaagaaaagaaaagaaaagaaaagaaaaaCACTCAATCCCCACCAAGCAAACCCAGGaa	TGTCCTCCCACACCAAGGTA	TTCCTGGGTTTGCTTGGTGG	39	15	107	20	225	20	60.105	60.759	3.08	4.61	0.863567	F	239	CTCGTGATCTCAAGTGGAAGGCAGTGAACACCCAATTCAATTCCTGCTGCTCTTGCTCCAAGAAGAAAGAATCTTTTCATCAAATACGAAACATCAAATCTAGCTGTGTCCTCCCACACCAAGGTAAAATGCTAAAATTTACTCTCCTGCACCAAATGCACCTCAaaaagaaaagaaaagaaaagaaaagaaaaaCACTCAATCCCCACCAAGCAAACCCAGGaaaaaCTATTCTGCCT
	M00842:287:000000000-BGGT4:1:1103:18861:12609	1	152	24	12	1	AT	TATATATATATATATATATATATA	NA	1	1	2	52	215	AACAAGATGTCAAAGCAAGTTAGCTTGATGTTTTAAGTCTCTaaaaaaTCTTAATGTATTGTGTTAAGTATTATGTtatatatatatatatatatatataTGAACTAAATGTGCCAATGATACTCAGCAATGGTACCAAATTTGATCGCTATCATAGATGGTCaaaaaTAAACCTAACTCAAACtatataGATAGGATGAATTGGGATCGTATCC	AACAAGATGTCAAAGCAAGTTAGC	GGATACGATCCCAATTCATCCT	52	93	76	24	290	22	58.477	57.44	3.09	3.24	10.0832	F	337	GGATGATAAAATCTCTACCTTATGTTAATTAGGGTTTTGCCCTTAAAATAGTTTATaaaaaTGTAGTGCAATATAAACAAGATGTCAAAGCAAGTTAGCTTGATGTTTTAAGTCTCTaaaaaaTCTTAATGTATTGTGTTAAGTATTATGTtatatatatatatatatatatataTGAACTAAATGTGCCAATGATACTCAGCAATGGTACCAAATTTGATCGCTATCATAGATGGTCaaaaaTAAACCTAACTCAAACtatataGATAGGATGAATTGGGATCGTATCCATAGAGATTAATGGAGTATGTTCAtttttAATTAAAGtttttATTAG
	M00842:287:000000000-BGGT4:1:1103:19035:19751	1	141	10	5	1	AT	ATATATATAT	NA	1	1	10	7	92	ACgaatgaatgaatgaatGGGTTCAAGTTTCatatatatatTCATTCAAATCCAAATACtgtgtgGAAGTTTTGGTGCATAGAAGCTAGGtt	ACGAATGAATGAATGAATGGGTTC	AACCTAGCTTCTATGCACCAAA	7	29	110	24	201	22	58.105	57.699	3.62	3.28	10.1959	F	318	AAACTTCTCaaaaaaaTaaaaaaaTAACTTTATTCTTCTCAAAAGaaaaaaaCCTTTATGCCAtttttttCAAGATCTATTATGTATGTAGGTATGtatataCGTATGTACgaatgaatgaatgaatGGGTTCAAGTTTCatatatatatTCATTCAAATCCAAATACtgtgtgGAAGTTTTGGTGCATAGAAGCTAGGttttttAGCTTCTTTAAAAGCACttttttGACtttttCATCTTCCAGAAGAATCTTTCAGGTGATGCTACCAAATACTTATATTTCTTTCAGAAGATAGtttttCTGCTATAAAGTTAA
	M00842:287:000000000-BGGT4:1:1103:19235:11757	1	48	10	5	1	AG	GAGAGAGAGA	NA	1	1	4	4	120	GCTTGATAGAGCTGGCCGGGGAGgagagagagaCACAGAGAAAGAGaaaaaaaGAAAAGAGAagagagaaaaaCTCTTGTTCATTccccccAATCTTacacacCTTAGTAATCCACAGCA	GCTTGATAGAGCTGGCCGG	TGCTGTGGATTACTAAGGTGTGT	4	64	25	19	144	23	60.596	59.673	6.13	3.72	4.92307	F	183	ACTCTTTTCAGCTTATAAAATAAAGCTTGATAGAGCTGGCCGGGGAGgagagagagaCACAGAGAAAGAGaaaaaaaGAAAAGAGAagagagaaaaaCTCTTGTTCATTccccccAATCTTacacacCTTAGTAATCCACAGCATTAttttttCGTCTACCTCCTTCCTCTGGACCAACCTGG
	M00842:287:000000000-BGGT4:1:1103:19269:19095	1	221	10	5	1	AG	GAGAGAGAGA	NA	1	1	4	30	121	ATACACTGGCCAACCTCAGCCATGCTTTGGTCACagagagGGAGTAGGGGgagagagagaggggggggggggggggggggggggggggAGAAGgagagaAGGGGAGTTCCGATCTACCGCG	ATACACTGGCCAACCTCAGC	CGCGGTAGATCGGAACTCC	30	42	171	20	291	19	60.035	60.009	4.26	3.85	1.04382	F	291	CATTTTGGGCCCTTACTGGGCCTTTAGTCTCCCTGGGCCATTGGGCCCTCCCTTTGGCCCATTGGGTCACTTACTATTATTGGGCCAACAGGCTATTGTACACAGGCCGGGGTCAATAAGACCCATGGCTTCTATACACCAACTGGGGTCAACAATACCCCATGGCTACAATACACTGGCCAACCTCAGCCATGCTTTGGTCACagagagGGAGTAGGGGgagagagagaggggggggggggggggggggggggggggAGAAGgagagaAGGGGAGTTCCGATCTACCGCG
	M00842:287:000000000-BGGT4:1:1103:19400:24505	1	164	10	5	1	AT	ATATATATAT	NA	1	1	7	45	150	AGCTTATGATCTGTGGTAGATTGGAATCAATTAGATTTGGGATTTGATAAttttttCCTTATGATCAATaaaaaaatatatatatGTATAAAAGATTGTTGGGCATCCTTCTTCGTCAGTGGGTAGTTTTCTGCCACCATGAGGAGATGG	AGCTTATGATCTGTGGTAGATTGGA	CCATCTCCTCATGGTGGCAG	50	45	89	25	238	20	59.396	60.179	3.53	4.85	5.78326	F	254	attattattattTATGATTTGTTATTCTAATATTTTAATCTTTTGCATATGATCTATAGAGAATTGTTCATCTTACAATTGGTATCAGAGCTTATGATCTGTGGTAGATTGGAATCAATTAGATTTGGGATTTGATAAttttttCCTTATGATCAATaaaaaaatatatatatGTATAAAAGATTGTTGGGCATCCTTCTTCGTCAGTGGGTAGTTTTCTGCCACCATGAGGAGATGGGGAAATCGGAAAGGCA
	M00842:287:000000000-BGGT4:1:1103:19599:28060	1	166	15	5	1	AAG	TCTTCTTCTTCTTCT	NA	1	1	2	93	290	GCGTCTTTGATCTTAGCCTGTATTAAGATCCTTGCCTCAGTTTATCATCATGATCTAGGGGCTCTTTGAATTTCTTTTCCAATAGCCTCACAAACTCATGATTTTCTCAGTTGCTGGTAAATTAATTGTTACATTTTCAGAAGaaaaaaCAGACATAGCAtcttcttcttcttctTTTGAGAGTTGCTCCGTCGTGCAGTTTCTTTCTTAAGGATTAGAAATTCCTGTTGGTGTTGGTGTTATAGTTTATGGAGGTCATATTTGCTGATGGTAGATCATGTCGCTTGTGA	GCGTCTTTGATCTTAGCCTGT	TCACAAGCGACATGATCTACCA	139	93	6	21	295	22	58.378	59.504	4	3.25	5.1181	F	314	GAAGAGCGTCTTTGATCTTAGCCTGTATTAAGATCCTTGCCTCAGTTTATCATCATGATCTAGGGGCTCTTTGAATTTCTTTTCCAATAGCCTCACAAACTCATGATTTTCTCAGTTGCTGGTAAATTAATTGTTACATTTTCAGAAGaaaaaaCAGACATAGCAtcttcttcttcttctTTTGAGAGTTGCTCCGTCGTGCAGTTTCTTTCTTAAGGATTAGAAATTCCTGTTGGTGTTGGTGTTATAGTTTATGGAGGTCATATTTGCTGATGGTAGATCATGTCGCTTGTGATAACATTAACTGTGATGTT
	M00842:287:000000000-BGGT4:1:1103:20020:18098	1	259	20	10	1	AG	TCTCTCTCTCTCTCTCTCTC	NA	1	1	4	3	97	TTTCTCAAGCAACTGAGCCCCTCCctctctctCGTTGTTGTGCTCACTTtctctctctctctctctctcCCTCCTTCTTGTGATTCCTGTAAATGGG	TTTCTCAAGCAACTGAGCCC	CCCATTTACAGGAATCACAAGAAGG	29	3	210	20	306	25	58.391	59.874	5.19	3.46	6.73527	B	306	TGCCACACGGTTAGCCaaaaaaaaaCAAAAGAAAAGAAAACGGCCTGATAGCCATTGTGAGGAGCAGACCTTTGCCCCTCACATCCTCTCACATCCACAAgggggTACGGCCCTTCATCCCCAACTGTTCAATTGGCTAGGGTAGGTGGGAGTTAGTGGGATAAAGAAGAGgagagagaGGAAGTCATCTTCCCTtctctcAATCTAGTTTTCTCAAGCAACTGAGCCCCTCCctctctctCGTTGTTGTGCTCACTTtctctctctctctctctctcCCTCCTTCTTGTGATTCCTGTAAATGGG
	M00842:287:000000000-BGGT4:1:1103:20678:19830	1	93	10	5	1	AG	TCTCTCTCTC	NA	1	1	3	21	142	GCCACTTAACTCTCAAGTTCAGCGATCTTTTCTCTGGTCTAAGCAACTTCTTTCTCTACCTTCTTGGTCTTCTCCTTTGCCTTAGCAACTTtctctctctcCTCACGTAAGGCAAGTCGTACCACTGAGTGAGCGGATTCCT	GCCACTTAACTCTCAAGTTCAGC	AGGAATCCGCTCACTCAGTG	68	21	2	23	143	20	59.813	59.466	4.26	3.66	3.72184	A	360	AGCCACTTAACTCTCAAGTTCAGCGATCTTTTCTCTGGTCTAAGCAACTTCTTTCTCTACCTTCTTGGTCTTCTCCTTTGCCTTAGCAACTTtctctctctcCTCACGTAAGGCAAGTCGTACCACTGAGTGAGCGGATTCCTCTATACTGATTTTGGCCCAAAGGGTTTCTACCTTGGCACTAAGCTCTttcttcttcTCTTGGAGTAcccccACCTCGGCCTCCAAGGAAGAACACCTCTTAACCtttttttttAAAGCTATCTTTATGTTGCTGACATCATTGAGCACCTTCATCAATCTCATATCGTATTCGTCAAAGGTCTGTTGCACTCGAAGCAGGCAATCATTCAGGTAGAC
	M00842:287:000000000-BGGT4:1:1103:21196:4488	1	115	10	5	1	AT	TATATATATA	NA	1	1	4	9	96	TGATGGGTAGGTCAGCCCATATTGTAAACACAAGGATAAAGCTTCTActctctACCtatatatataTTGTAGTTGTCCCATTGAGGTCATAACGTG	TGATGGGTAGGTCAGCCCAT	CACGTTATGACCTCAATGGGA	36	9	59	20	154	21	60.327	57.74	4	4.37	3.58796	B	154	GGCAAGAGCACTATTAGCAATAACAGATTACCATCGCTAATACCCTGAATTCTTGTAGTGATGGGTAGGTCAGCCCATATTGTAAACACAAGGATAAAGCTTCTActctctACCtatatatataTTGTAGTTGTCCCATTGAGGTCATAACGTG
	M00842:287:000000000-BGGT4:1:1103:21390:13637	1	141	12	6	1	AT	ATATATATATAT	NA	1	1	2	62	219	AGTTGGCCATTGTCACAcccccTGACCCATCATATGGGGCCATCTGATCGTGCAAAATATGTAGAATCCATCCACAAAGTTTCTACGAAGCCTAAGAGAAAAGATCtttttaaaaaaaaCAATAatatatatatatAATTTGTGTAAAATTTAAAATATTGATCAAATTCAGTCTATACGATCAGTCACTAtctctcTTGTACACCATGATGGGTACCT	AGTTGGCCATTGTCACACCC	AGGTACCCATCATGGTGTACA	104	62	17	20	235	21	60.828	58.159	4.61	2.9	3.66802	F	281	CATATGATATGTTGGAAGTTGGCCATTGTCACAcccccTGACCCATCATATGGGGCCATCTGATCGTGCAAAATATGTAGAATCCATCCACAAAGTTTCTACGAAGCCTAAGAGAAAAGATCtttttaaaaaaaaCAATAatatatatatatAATTTGTGTAAAATTTAAAATATTGATCAAATTCAGTCTATACGATCAGTCACTAtctctcTTGTACACCATGATGGGTACCTATAGGTTCTCAACCCatatatatACAAAATAATTCAGTTTTATTTA
	M00842:287:000000000-BGGT4:1:1103:21431:14019	1	93	10	5	1	AC	ACACACACAC	NA	1	1	4	64	228	cccTGGTCATCCTGTCTAGTGATTcccccATCTCTTCATGATCGTGAAGGCACAAtttttGCACAATCATAAAAGTAAGGCAGAacacacacacCCCAcaccaccaccacCCCGCGGGGCCTTCTTCAGACGTAGGACTTGGGCTGAATTTGGGCCTTGTTTAGCTACTGTTCTTGGGTGTTATGTTCTAGAATTGGCCCTTATTTTGGGCCTGATATTGGACTAACC	CCCTGGTCATCCTGTCTAGT	GGTTAGTCCAATATCAGGCCCA	64	112	9	20	236	22	57.833	59.558	2.57	5.36	4.60866	F	344	CCTGAGcccccTGGTCATCCTGTCTAGTGATTcccccATCTCTTCATGATCGTGAAGGCACAAtttttGCACAATCATAAAAGTAAGGCAGAacacacacacCCCAcaccaccaccacCCCGCGGGGCCTTCTTCAGACGTAGGACTTGGGCTGAATTTGGGCCTTGTTTAGCTACTGTTCTTGGGTGTTATGTTCTAGAATTGGCCCTTATTTTGGGCCTGATATTGGACTAACCTGTCATCTATTTTGGGCCCAAtttttATGTGATTAAGCTGCTAACTTTCTTGttttttttGTCTAGATCTGATAATTTCAGCCCACCTTGCCCATGACTCAGTAGCCA
	M00842:287:000000000-BGGT4:1:1103:21477:6283	1	127	20	10	1	AG	TCTCTCTCTCTCTCTCTCTC	NA	1	1	4	25	190	CGTCATTGTTGCTGATGACTGGGAAGTAGCCATGGATGGCCAGAGACTGTAGTGACAGGAGAGGAGAACCTAGGAAACCGAGAGGAAGGGAAgggggggagagagGTATCATTTtctctcCCTTtctctctctctctctctctcGATTGTGATTGTGAGCCGGTCTGGCTCAGGACTGTGGTGAGAACTG	CGTCATTGTTGCTGATGACTGG	CAGTTCTCACCACAGTCCTGA	102	25	3	22	192	21	60.16	59.311	4	3.86	3.84835	F	475	GTCGTCATTGTTGCTGATGACTGGGAAGTAGCCATGGATGGCCAGAGACTGTAGTGACAGGAGAGGAGAACCTAGGAAACCGAGAGGAAGGGAAgggggggagagagGTATCATTTtctctcCCTTtctctctctctctctctctcGATTGTGATTGTGAGCCGGTCTGGCTCAGGACTGTGGTGAGAACTGAGATCgagagaAGAGGAGAAAGAGGAagagagACATGGAGctctctctctctctctctcccccTCCTAGTGTATGTAGTGGTGAGCTAGTCCCAGACTCAGTTGTAGACTTTAGTATAGGCCTACTAGAAACAACAGTGAGGTGGGGCTTGATGCCTTGCCCACTaaaaaTAGTAAAGGCCCAATGGGCCAGGAATCGGAGGCCTAT…
	M00842:287:000000000-BGGT4:1:1103:22185:3279	1	165	10	5	1	AT	TATATATATA	NA	1	1	4	24	132	TTCACATGAGATGCGAGcccccTAGTCTAGAGAAACCTAACAAGCTATACATTGGTAAAGaaaaaaGAAATTATGATtatatatataTGCATAGAAGATGATGAATAAATATGTTGTGGATTGCTCAGAGAT	TTCACATGAGATGCGAGCCC	ATCTCTGAGCAATCCACAACA	57	24	88	20	219	21	60.463	57.292	5.19	3.33	4.17098	F	267	ATTTACATCAATTAAGGTTAGACTTGGGCAATTAGGGTTTCTAAATTTTAAATTTCTACTGCGGCAATTAAGAGTTAATTGGGCACATTCACATGAGATGCGAGcccccTAGTCTAGAGAAACCTAACAAGCTATACATTGGTAAAGaaaaaaGAAATTATGATtatatatataTGCATAGAAGATGATGAATAAATATGTTGTGGATTGCTCAGAGATTGTATTATTCAGTATGTGAACAATACGTAAGTAAAAGCTGGAGCTAGC
	M00842:287:000000000-BGGT4:1:1103:22373:13048	1	44	15	5	1	AGC	AGCAGCAGCAGCAGC	NA	1	1	8	15	182	aagaagAGGAGGAAGAATCAAAGTACTAGTAGGAGGAGAagcagcagcagcagcAAAGATAGCCTTCTCTTCTGTCCCCTCCATCTTCATTCTCTTGGCTCTTAAGCAGGCCATTCTCTTGATCCTTAGCTTCCTATTGCAAGGATGCTCTATCTTCTTGTACTTGTTCATTGATGCCAGCT	AAGAAGAGGAGGAAGAATCAAAGT	AGCTGGCATCAATGAACAAGT	15	107	5	24	186	21	57.553	58.478	2.66	3.16	8.96909	F	186	CaagaagaagAGGAGGAAGAATCAAAGTACTAGTAGGAGGAGAagcagcagcagcagcAAAGATAGCCTTCTCTTCTGTCCCCTCCATCTTCATTCTCTTGGCTCTTAAGCAGGCCATTCTCTTGATCCTTAGCTTCCTATTGCAAGGATGCTCTATCTTCTTGTACTTGTTCATTGATGCCAGCT
	M00842:287:000000000-BGGT4:1:1103:23099:14933	1	270	10	5	1	AT	ATATATATAT	NA	1	1	3	27	121	CCCAGAAGTTGCCAGAAGAATGTGCAAAATCCAAATATCCAAGAAAAatatatatatAAGAAGAAAAGGGCATTTTGGTCACTCAAAAtttttAAATCAAACTAATGTATGTCAGCTCAAA	CCCAGAAGTTGCCAGAAGAA	TTTGAGCTGACATACATTAGTTTGA	27	39	223	20	343	25	57.723	57.022	2.52	2.69	10.2545	F	432	ATCGACACTCCCAGCGCCTCCGCCTCCGGCGCAGAGCATCCCGGCCCATCGAGACAGCGGTCCCACGGCGGCGAGTGGCAACAAAGGGTATTTGACCTTCTATTGGGGATGACATTTTGtttttAAGCAATAAAACAAGCCTTCAATTGCTTACTTCAACCTCGGACCAAAATTGATTCTTTATGCCCGACACCTAAAGCAGTATTCAAAGCGACAAAGAACCCCAGAAGTTGCCAGAAGAATGTGCAAAATCCAAATATCCAAGAAAAatatatatatAAGAAGAAAAGGGCATTTTGGTCACTCAAAAtttttAAATCAAACTAATGTATGTCAGCTCAAAACAGCTCCCTAATTTAACATCATATCATCTTTaaaaaGAACTATGAGTGCCGCCGT…
	M00842:287:000000000-BGGT4:1:1103:23142:22678	1	128	20	10	1	AT	ATATATATATATATATATAT	NA	1	1	11	14	102	GGGTGCCACACGTATGTACATACGtacatacatacatacaTGTGGGCatatatatatatatatatatGCATATGCatatatACATCGGTGTatgcatgcatg	GGGTGCCACACGTATGTACA	CATGCATGCATACACCGATGT	27	14	81	20	182	21	60.037	59.395	2.9	3.06	1.64237	F	357	GACAATCAAGCTAAATATTCCCCATGTGCAATAACAtttttACCCTCCATGAATTGCACTACTGAATCATGCTTGCATGAGGGTGCCACACGTATGTACATACGtacatacatacatacaTGTGGGCatatatatatatatatatatGCATATGCatatatACATCGGTGTatgcatgcatgcatgcatatatACGTGtatatatatatatataCATAAGTACATATGtacatacatacatacatacaTATGATGTATCatatatatatatatatatatatatatacacacacacacacTACAAAAGAAGGGGTAACTAGTAACTAttttttCCCGACCTTTATGGAAAGCATCGGG
	M00842:287:000000000-BGGT4:1:1103:23293:13071	1	169	42	9	1.5	AAG	AAGAAGAAGAAGAAGAAGAAGAAGAAGTAGTAGTAGTAGTAG	NA	1	1	15	1	148	TGGTTGAAGCAATGCAAGCAGATTAAGCAACAAAGGCAAAAGGAGAATATaaaaaGCTGATGAAGAAAATGAAGGAGAAAaagaagaagaagaagaagaagaagaagtagtagtagtagtagAAGCTAAAGAAGTAGAAGGAGAAGAT	TGGTTGAAGCAATGCAAGCA	ATCTTCTCCTTCTACTTCTTTAGCT	60	1	89	20	236	25	59.249	57.029	3.91	3.32	8.72282	F	245	TATGAAGCAGTTCAAGCAGTAGAAGCAAATAAAACAACAAAAGCAAATGATGAAGTAGAAGGAGAAGAAGCGAAAGGTGAAGAAGTAGTGGTTGAAGCAATGCAAGCAGATTAAGCAACAAAGGCAAAAGGAGAATATaaaaaGCTGATGAAGAAAATGAAGGAGAAAaagaagaagaagaagaagaagaagaagtagtagtagtagtagAAGCTAAAGAAGTAGAAGGAGAAGATAAAGTAGTT
	M00842:287:000000000-BGGT4:1:1103:24027:12957	1	58	66	22	1	AAT	TAATAATAATAATAATAATAATAATAATAATAATAATAATAATAATAATAATAATAATAATAATAA	NA	1	1	5	4	141	AAGAAAGACGTAGCTCGGACCAATCtaataataataataataataataataataataataataataataataataataataataataataaaaaaaaaaGAGAGTTAGaaaaaaaaaGAAGAGAAGATAACAAGGAAGGAA	AAGAAAGACGTAGCTCGGACC	TTCCTTCCTTGTTATCTTCTCTTCT	4	25	33	21	173	25	59.798	57.439	4.46	2.85	8.76268	F	287	GCTTCTTTCTCAAGAAGCTTAGTATAGTCATGAAGAAAGACGTAGCTCGGACCAATCtaataataataataataataataataataataataataataataataataataataataataataaaaaaaaaaGAGAGTTAGaaaaaaaaaGAAGAGAAGATAACAAGGAAGGAAAACTAATAAGAATTTATATGAAAACAAATCCCAGCAAAAGCTAAGTAACCAAAGGAAGCAATTTGTTTACATTCTTCgggggATATTATGTTTACATCCATACTCTTTACTCTA
	M00842:287:000000000-BGGT4:1:1103:24342:14661	1	26	10	5	1	AT	TATATATATA	NA	1	1	5	0	130	GCATCTTCACTCCTACTTTCAAGTGtatatatataGATATGTTTTGATTGCAAATAGATTCTCAAtttttGGTTGATAGATTTCTTTTGTTTCTTCTCTTAagagagagCAAGAATTTGATTAAGATGCA	GCATCTTCACTCCTACTTTCAAGTG	TGCATCTTAATCAAATTCTTGCTCT	0	70	1	25	130	25	59.879	57.599	3.16	4.09	12.5221	F	451	GCATCTTCACTCCTACTTTCAAGTGtatatatataGATATGTTTTGATTGCAAATAGATTCTCAAtttttGGTTGATAGATTTCTTTTGTTTCTTCTCTTAagagagagCAAGAATTTGATTAAGATGCACATACAAAAGATAAGAATATGTAATGATACATTGATAGTAGAGATAAAtttttAAGAAAGAACATGGAAGTATCatatatAGATCTACTTATACAATAATTTGATTGGTTTCATTACCTAAGAGCTCTTACTGTCAAGTCTTCTCAAATTCAACTTCAATGGTAATATGATGGGCAACACCAGCAGGGACGAAGGTGGGTTTGCAATCTGGAGTTTGGACTCTAGGCTAATTGAGGTAAATGGGTCATCGATCTTTGATACCTTAGTTA…
	M00842:287:000000000-BGGT4:1:1103:24360:17347	1	49	18	9	1	AT	ATATATATATATATATAT	NA	1	1	3	0	96	TGGAACAACCACCGAATGCAatatatatatatatatatAAAATCAGTCCATTTCTCTATCAAGAGAATAGACTAAACTACCGACGAGTCTCCACCA	TGGAACAACCACCGAATGCA	TGGTGGAGACTCGTCGGTAG	0	38	29	20	124	20	60.466	60.676	3.96	3.18	1.14221	A	131	GGTGCGACGGTaaaaaTCACATGATGAGTGGAACAACCACCGAATGCAatatatatatatatatatAAAATCAGTCCATTTCTCTATCAAGAGAATAGACTAAACTACCGACGAGTCTCCACCATTTGGGG
	M00842:287:000000000-BGGT4:1:1103:24848:14349	1	119	12	6	1	AG	TCTCTCTCTCTC	NA	1	1	4	36	144	CCCTCCGATGCTCAAGTCAGTGAGGTAGGCTATACTAGCAATAGAGAAAAGAAGGAGAGGATAATGTATCTCTTTTtctctctctctcTAGGGAGGCAGGAGGTACCAGAATCAAAAGTTGTCATTGTCAGAGTTGGGTCTCCT	CCCTCCGATGCTCAAGTCAG	AGGAGACCCAACTCTGACAA	56	36	43	20	186	20	60.179	57.897	3.51	3.18	2.28224	A	398	GTCCTACaaaaaaGTCCTCACCATATTTGGTTCTAGAAGGGACCCTCCGATGCTCAAGTCAGTGAGGTAGGCTATACTAGCAATAGAGAAAAGAAGGAGAGGATAATGTATCTCTTTTtctctctctctcTAGGGAGGCAGGAGGTACCAGAATCAAAAGTTGTCATTGTCAGAGTTGGGTCTCCTTTTATAGGATGTAAGTAGAGCCTTGTATAAAGGCCACATAATCGGTCATGCTAGCAAGATGCATGGAAGCCACGTAACTAGTCATACTGGTGAGATGCATGTAGACCATGTAACTAGTCAAGCTGGAGAGCATTGAATGGAAAAGTAACATCTTCTATTGTCATCatatatGCTAAAACTAGCTAATTAAAATTAGATCTCTATCATGGTTG
	M00842:287:000000000-BGGT4:1:1103:26591:18080	1	182	12	6	1	AG	CTCTCTCTCTCT	NA	1	1	4	18	106	CGCAGTCTTATTCAGCTTGGCAGCCATGGTTTTGCAACCctctctctctctTCAGCTTGTTCCCTCTTCGGCTTATCAGCCCCTATTTGGTTGTACGCCACTTTCG	CGCAGTCTTATTCAGCTTGGC	CGAAAGTGGCGTACAACCAA	18	35	143	21	248	20	59.937	59.061	4.52	3.67	2.00189	A	458	AATTAGGAAGGACCGTACAGAGTCTCCGAAGTTTTGAAGTCGGGAGCCTACAGATTAGAGCATCTTGAAGGAACCCCTGTTCCCAGAACTTGGAATGCTAACAATCTAAGAATGTACTATTAGTGATTAACACTAAATGAAACGCAGTCTTATTCAGCTTGGCAGCCATGGTTTTGCAACCctctctctctctTCAGCTTGTTCCCTCTTCGGCTTATCAGCCCCTATTTGGTTGTACGCCACTTTCGACTATAGGCCTGGTTTCACACCTGCCTTCTTTTCAACTTATCAGCCTATTCGGCTGTATGCCTCCACTTTCAGCTTAACGGCTGTTGCCGCTCGCCGCCGTCGGGCTGGTGTCTTGCCGGGCTGGGGTGCTCTGCGCCGGAGGCAGAGGTC…
	M00842:287:000000000-BGGT4:1:1103:26744:10473	1	38	10	5	1	AG	GAGAGAGAGA	NA	1	1	4	2	227	AGCTAGTGAGGGAGAGGAGAGCgagagagagaTGTTGAGTGCCTCACCTGAGTTTCGAGAGTGCCGGCAGTAGTGATTTTCAACGAGCACGATCACAAGCTGTCGCAAATGAGGGAGGAAGAAAATGgagagaTTAGAGGAAGAAGAGGAATGAGGCTTAGGCAATGgagagaTTAGAGGGGAGATCGAGAGCTTGGCTCCTCTATTAGAGGAGCCTCCATTTGTCC	AGCTAGTGAGGGAGAGGAGA	GGACAAATGGAGGCTCCTCT	2	175	16	20	242	20	58.398	59.085	3.71	3.69	2.51781	B	435	GTAGCCGTAATACTAAGCTAGTGAGGGAGAGGAGAGCgagagagagaTGTTGAGTGCCTCACCTGAGTTTCGAGAGTGCCGGCAGTAGTGATTTTCAACGAGCACGATCACAAGCTGTCGCAAATGAGGGAGGAAGAAAATGgagagaTTAGAGGAAGAAGAGGAATGAGGCTTAGGCAATGgagagaTTAGAGGGGAGATCGAGAGCTTGGCTCCTCTATTAGAGGAGCCTCCATTTGTCCTATTGCCCCACACTGAGGAATCGTGCTTGTCGCCCATAACGGGCGACCATTTGGTTTGGGCTTGGCCCAATGGGCCAGCCCAACTAGTCACCTTAGAGGGCATCATTTGGAcccccAATTAAAATATCATATACATAAGCACATTCAAGATTAAATT…
	M00842:287:000000000-BGGT4:1:1103:28293:11326	1	53	10	5	1	AT	ATATATATAT	NA	1	1	4	30	159	GTCAAGCTCTCACAGGGCTGCCAGTTTGGTCATCTATGTTCAAATGTCCAatatatatatTAAGTCATCTGAGGTCATAATACCAGGACCTTGTAATATGGCAAACTGTTTTAGAGTTACTTTGTCTGGGATATAAAGAAGTCAACTTATCCGAGCACT	GTCAAGCTCTCACAGGGCTG	AGTGCTCGGATAAGTTGACTTCT	30	76	3	20	161	23	60.673	59.488	4.85	2.85	4.18496	A	244	CGGTCAAGCTCTCACAGGGCTGCCAGTTTGGTCATCTATGTTCAAATGTCCAatatatatatTAAGTCATCTGAGGTCATAATACCAGGACCTTGTAATATGGCAAACTGTTTTAGAGTTACTTTGTCTGGGATATAAAGAAGTCAACTTATCCGAGCACTTTAACCAATTTATTCAGTATAAGGGGCTTGTATAGTTAAAAGATTGATGTATCTGAGCTGTTCCCAGTCTAGTTAGATTGAGA
	M00842:287:000000000-BGGT4:1:1103:29469:13925	1	181	12	6	1	AG	TCTCTCTCTCTC	NA	1	1	2	61	223	ACTGTTAACCATCTCATTCCATAGTATTCATTTTATCATGTTGACCCTATTTTCCTTCTTTTAATATTCTATCCTTAAATCCCACTTGTTGATCTTTTCACAAACTCTATCAACTAGCCCTCAAGTtctctctctctcTTTAAAATTTAGTCATGCTTGCCATTTCTTGATACATACATTaaaaaCTACCAATCTATGTTGGCTAGCTAAACTCTTATTGGCA	ACTGTTAACCATCTCATTCCATAGT	TGCCAATAAGAGTTTAGCTAGCCA	101	61	55	25	277	24	57.8	60.081	2.12	4.75	11.281	F	363	GTGATGGCttttttCCTTTGATACTTACAACATATCTATTGGCATTTTCTTGATACTGTTAACCATCTCATTCCATAGTATTCATTTTATCATGTTGACCCTATTTTCCTTCTTTTAATATTCTATCCTTAAATCCCACTTGTTGATCTTTTCACAAACTCTATCAACTAGCCCTCAAGTtctctctctctcTTTAAAATTTAGTCATGCTTGCCATTTCTTGATACATACATTaaaaaCTACCAATCTATGTTGGCTAGCTAAACTCTTATTGGCATGACTTTACAATCTTAATAAAACTCAATCTATCTTTCTAGAAAAGGAAAAGAAAATCTTTTCACTAGTATTATACCCAtttttAGA
	M00842:287:000000000-BGGT4:1:1103:6373:21656	1	169	10	5	1	AG	TCTCTCTCTC	NA	1	1	2	4	139	TCTCATTTCATTCTGTTCCACTAGAAATACTATTTCAGATCTCGATACATCTTTATACTACCTAGGTATACCGCAAATTaaaaaTtgtgtgCTTCTGCTAAGAtctctctctcTATAGCTCAGGATTCTCTAGcacaca	TCTCATTTCATTCTGTTCCACTAGA	TGTGTGCTAGAGAATCCTGAGC	78	4	66	25	204	22	57.755	59.833	2.43	4.26	9.41217	F	236	CTGGCCTTTAATGTTATGCCTTCACTTACTAACAAGATAAGCACTGTGCCATAAATTGGGTTATTTCTCATTTCATTCTGTTCCACTAGAAATACTATTTCAGATCTCGATACATCTTTATACTACCTAGGTATACCGCAAATTaaaaaTtgtgtgCTTCTGCTAAGAtctctctctcTATAGCTCAGGATTCTCTAGcacacaTAATCAGTCTCTAAAATATAGGGTACCATTCA
	M00842:287:000000000-BGGT4:1:1103:6693:17941	1	44	50	9	1.5	ACAT	CATACATACATACATACATACATACATACATACATATATATATATATATA	NA	1	1	17	2	139	ACATGCATACATACAAACATGCATGcatacatacatacatacatacatacatacatacatatatatatatatataTTTATATTATAATAGGTCTGAATAAtttttAAATTTCTTTACAAAACCATTTCTTAGCCCTGCT	ACATGCATACATACAAACATGCA	AGCAGGGCTAAGAAATGGTT	2	44	19	23	157	20	57.42	57.093	3.96	3.67	8.48702	F	221	ACATGCATACATATGTATACATGCATACATACAAACATGCATGcatacatacatacatacatacatacatacatacatatatatatatatataTTTATATTATAATAGGTCTGAATAAtttttAAATTTCTTTACAAAACCATTTCTTAGCCCTGCTTCTATTATTTGAGCTCCTTTACCCCTTACCCCTAGGCCTTAATTACCTATAGAAAATGTAGAAA
	M00842:287:000000000-BGGT4:1:1103:7379:22517	1	272	12	6	1	AG	AGAGAGAGAGAG	NA	1	1	4	40	176	AGCACCAGCCTTAGATCAGCACTGAGAAAGGCAGCAAGTTAGTGAGGGAAAGAAAGTTTTagagagagagagGGCATCGGTGGGAagagagGtttttGGGAATGTGGCAACTCTTTGGGAGTTCACAATGAGAAGCATTGAGAAGAGGAGATGATGAGTAGAGGAGGCAtgtgtgC	AGCACCAGCCTTAGATCAGC	GCACACATGCCTCCTCTACT	40	84	212	20	387	20	59.82	59.461	4.26	2.57	0.718987	F	441	CTTGTCCACCATGAGATCACCCATCAGAAGACACAAAATCCTTACTCTTCCCTAATCTAGTGCTAGCCAatatatCTAAAATTAAATCCTACCCTAAACCCTCCAAAATTTGGTTCTATAATGTCAAAATTTTGACTTAAAGAAGGGATTAGGGTCTTACCCTAACAATGGTTTCAATTGCTTAGCCTTTCCCTCCCTTGTACTTCTTCCAAGCACCAGCCTTAGATCAGCACTGAGAAAGGCAGCAAGTTAGTGAGGGAAAGAAAGTTTTagagagagagagGGCATCGGTGGGAagagagGtttttGGGAATGTGGCAACTCTTTGGGAGTTCACAATGAGAAGCATTGAGAAGAGGAGATGATGAGTAGAGGAGGCAtgtgtgCATCAATGGAAGA…
	M00842:287:000000000-BGGT4:1:1103:7495:12524	1	86	16	8	1	AG	AGAGAGAGAGAGAGAG	NA	1	1	4	35	156	GGTGCAAGGATTGGTgagagagaAGGaaaaaGCGACGTAGTGAGAATAGGgagagagaGCTCGTCGTCATTGGaaaaaCACAACAagagagagagagagagTAGATTTCCCCTCTTTCctctctTTCTCACTCTATCCTCCTCAACTACCCAAGCC	GGTGCAAGGATTGGTGAGAGA	GGCTTGGGTAGTTGAGGAGG	64	35	1	21	156	20	59.996	59.747	3.1	4.3	1.25691	F	190	GGTGCAAGGATTGGTgagagagaAGGaaaaaGCGACGTAGTGAGAATAGGgagagagaGCTCGTCGTCATTGGaaaaaCACAACAagagagagagagagagTAGATTTCCCCTCTTTCctctctTTCTCACTCTATCCTCCTCAACTACCCAAGCCAATTTGATGGCTAGGGTCTCACACCGTACCCCTC
	M00842:287:000000000-BGGT4:1:1103:8056:17407	1	318	20	10	1	AG	AGAGAGAGAGAGAGAGAGAG	NA	1	1	4	0	124	AATGGCGAGCTGTAGTCTGGAGACATCCTCCTTGtttttGGACTTtgtgtgCGGAGATaaaaaTGAGAGCTTTTGGAAGGGGCGTagagagagagagagagagagGAATGGTGGGTGTCGAGCA	AATGGCGAGCTGTAGTCTGG	TGCTCGACACCCACCATTC	65	0	233	20	356	19	59.823	60.004	3.86	2.67	1.18052	F	417	GGAGGGGTCGATGCAGATTTCTTGGATTTCTTTGGAGATGACTGGGATGGAGGAGGGGTGGCAGGAGGGCTTGGGGAGGTGGTGTGCAGTGGCAGTGcccccACAGCGGAAGGCAAACCAGAGGGAGATGAGGAAGAGCAGAAGGACGAACACGATGCCAACGCAGATGCTGATGATGGCCCACATGTGGAGGCCGAAGATCACTGTCTGCTTCGAGAGCTCATCGTTGAGGAATGGCGAGCTGTAGTCTGGAGACATCCTCCTTGtttttGGACTTtgtgtgCGGAGATaaaaaTGAGAGCTTTTGGAAGGGGCGTagagagagagagagagagagGAATGGTGGGTGTCGAGCACTGAGATAATACTGCAAACTTTTGTagagagCTAAAGAGTGGA…
	M00842:287:000000000-BGGT4:1:1103:8554:11183	1	109	14	7	1	AG	GAGAGAGAGAGAGA	NA	1	1	4	73	232	CACGGCTACCATGCTCTGATCGGTCAAGGGTACTcccccACGGCCACCCATTTTCGGCCAACACTCAGCCACAGTCGCAAACagagagGAAGGgagagagagagagaGCTGCATCTCTGTTTccccccTTCCCTTcttccttccttctctctcAGTTTCCATGGGGTTTCCCTcccccATCATTGTGATCTCAGTCTCAGTCACTTTTCCTAATGGTCAGTGGTCAACGACA	CACGGCTACCATGCTCTGAT	TGTCGTTGACCACTGACCAT	73	105	16	20	247	20	59.894	59.244	2.9	3.55	0.861887	F	342	GGCCAACTAGCAGCCCACGGCTACCATGCTCTGATCGGTCAAGGGTACTcccccACGGCCACCCATTTTCGGCCAACACTCAGCCACAGTCGCAAACagagagGAAGGgagagagagagagaGCTGCATCTCTGTTTccccccTTCCCTTcttccttccttctctctcAGTTTCCATGGGGTTTCCCTcccccATCATTGTGATCTCAGTCTCAGTCACTTTTCCTAATGGTCAGTGGTCAACGACAATGACTGTAAGGATGGTCGGCTATGCCATGAGATGCTCACTCGATCGATTGGCCAACACATTCCttttttCCTCACCGTCGGGCCTCCATTGTCC
	M00842:287:000000000-BGGT4:1:1103:8555:5095	1	101	10	5	1	AG	TCTCTCTCTC	NA	1	1	3	62	224	AGAAGATTTATAGCTTCAGCCCAAAAGTATTTTGAAAGATTACCTTTACTCAATATAGTTCTAGCTATCTCTTTTAAAGATCTATtctctctctcAACAACACTGTTTTACTATGGTGTTCTTGGGGCTAAGAAATTGTGTTCTATCCCCTTATCATTGTAAAATTCTTCAAAATTTTAAtttttAAATTTAGATCCATAGTCACTTCTAATTGCTATGACTGA	AGAAGATTTATAGCTTCAGCCCA	TCAGTCATAGCAATTAGAAGTGACT	62	104	16	23	239	25	57.363	57.825	5.36	3.41	12.8123	F	354	AGATCGGAGTATTTTAGAAGATTTATAGCTTCAGCCCAAAAGTATTTTGAAAGATTACCTTTACTCAATATAGTTCTAGCTATCTCTTTTAAAGATCTATtctctctctcAACAACACTGTTTTACTATGGTGTTCTTGGGGCTAAGAAATTGTGTTCTATCCCCTTATCATTGTAAAATTCTTCAAAATTTTAAtttttAAATTTAGATCCATAGTCACTTCTAATTGCTATGACTGACATATTCTTTTGATTCATAATCTTTCTATAAAACTTAATGAATATAGTAAAGGCTTCATCCTTGTGTCCCaaaaaTAAGACCCATGTAAATCTAAAATAGTCATCTACTATCATC
	M00842:287:000000000-BGGT4:1:1103:9436:10252	1	221	30	15	1	AT	TATATATATATATATATATATATATATATA	NA	1	1	4	51	189	GCAGCCTGATAGAGATAAGCCATAAGCTTCAAAGTTTGTATCACACGTGCTTATATTAACATAGGGCTTGGTTATAGTGTTACATTtatatatatatatatatatatatatatataGTTTTATTTATGAGTAATTATTTATAAAGGACAATTTTGTCAATAGTTACTTGGTGTCGTTTGATGGAACTGA	GCAGCCTGATAGAGATAAGCCA	TCAGTTCCATCAAACGACACCA	64	51	135	22	323	22	59.699	60.159	4.75	4.17	4.46018	A	362	ATTTTCaaaaaGTAGTGAGACGTAACTTAGAATCTAGAAAACAAACTGCTACATAGCCAACTGCATCAAACTCCAATTACCCAAAATATTCACTCACAAGCAACTAAACAAGCCCAAGTTTCAAATTTGGAACTGCAGCCTGATAGAGATAAGCCATAAGCTTCAAAGTTTGTATCACACGTGCTTATATTAACATAGGGCTTGGTTATAGTGTTACATTtatatatatatatatatatatatatatataGTTTTATTTATGAGTAATTATTTATAAAGGACAATTTTGTCAATAGTTACTTGGTGTCGTTTGATGGAACTGATACCCTGCAATTACAAGGGAATGGTCCCAACTTTTCATA
	M00842:287:000000000-BGGT4:1:1103:9741:11620	1	59	108	7	4	AG	CTCTCTCTCTCTCTCCCTCTCTCTCTAGTTCTATACCCCTCTCCCCCTCTCTCTCTCCCCCTAGTTCTACACTTCTCTCTCTCTGTTTCCCTCTCTTCCTCTCTCTCT	NA	1	1	8	1	168	TCTCTAAGtctctcctctctACCTCctctctctctctctCCctctctctctAGTTCTATACCCCTCTCCCCctctctctctcccccTAGTTCTACACTtctctctctcTGTTTCCctctctTCctctctctctAGTTCCATGccccctctctctcCCACATGATGCGG	TCTCTAAGTCTCTCCTCTCTACCT	CCGCATCATGTGGGAGAGAG	1	15	34	24	201	20	58.465	60.25	3.08	3.2	5.78481	G	406	TATAATAAATTAAGAATTGATATTCTTCTAAAATCTCTAAGtctctcctctctACCTCctctctctctctctCCctctctctctAGTTCTATACCCCTCTCCCCctctctctctcccccTAGTTCTACACTtctctctctcTGTTTCCctctctTCctctctctctAGTTCCATGccccctctctctcCCACATGATGCGGGATAGTaaaaaTATGTTAAATGACTAAGGAGATAGCAGAGAATAAGATGAGCAATaaaaaTTATAAACAAAGATCTACTTGACCGTAAAGACTAAAAGGCTATCAAGTgagagaCTATTAGATaaaaaaGTATTATCCGCATGCTAGATCTTGCTAGGAATAAAGAATTAGAACCTAATGGTTAAGAAACTATTTTGA…
	M00842:287:000000000-BGGT4:1:1103:9856:5367	1	36	14	7	1	AT	TATATATATATATA	NA	1	1	10	13	106	GCTCACTCATTATCGACTGAGCTCTCATATTCTATtatatatatatataTTTGGTAGGAATCGAAGCAGGTACATCTAACCAACCTAATCTTTCCAGCGAGGTCCC	GCTCACTCATTATCGACTGAGC	GGGACCTCGCTGGAAAGATT	13	37	1	22	106	20	58.951	59.747	4.26	2.4	3.30253	A	276	GCTCACTCATTATCGACTGAGCTCTCATATTCTATtatatatatatataTTTGGTAGGAATCGAAGCAGGTACATCTAACCAACCTAATCTTTCCAGCGAGGTCCCACCGAAGAGGAGGGTGttttttGATTAGTTTCTAAGTCTAGAGGAGACAGAGAAAATAGTTTGatatatGGTGAGAAGTATGAATATAAATACCATACCTCCTGAGGAACACTAGCAAATTATCttttttGGTTACCTCACCTTTATAGGGGTATGTGCTTATTtatata
	M00842:287:000000000-BGGT4:1:1103:9968:8380	1	275	10	5	1	AC	TGTGTGTGTG	NA	1	1	3	40	140	TCCTAGGTGAAATGGTTGGGCCTGTTGAGCtgtgtgCATTTTATCCCGGTGTAGtttttttttttCAtgtgtgtgtgATAGACTAGTTGGGCTCTTGGGCTTGAGCTAACTTTGACAtgtgtgAACTCGACCAAATAGCT	TCCTAGGTGAAATGGTTGGGC	AGCTATTTGGTCGAGTTCACACA	46	40	208	21	347	23	59.995	60.244	5.36	3.72	4.24953	F	364	AAATGCCCTCCGATACCGGCACGGTGGACCTTGCTTAGGACTGTGGTGTCTAAGTTTTGTTTGGTTCTGAATAGATAAAGTTCtttttttttttttAGAAAAGGAAAAGAAAATGATATGTTAGATGTCTTTTCCTGGATCAGTTTCATTCTTAGCTGTTTAATGGAAAGGGTATCtttttGAGAACTCTTGAATCCCACAATCAACTCCTAGGTGAAATGGTTGGGCCTGTTGAGCtgtgtgCATTTTATCCCGGTGTAGtttttttttttCAtgtgtgtgtgATAGACTAGTTGGGCTCTTGGGCTTGAGCTAACTTTGACAtgtgtgAACTCGACCAAATAGCTTTCCTATATTGGTGATA
	M00842:287:000000000-BGGT4:1:1104:10203:17554	1	190	10	5	1	AG	GAGAGAGAGA	NA	1	1	4	45	246	ACCAGCCTCTGATTTCTGCACCTTGTGTTAGATGCTACAGACCATCGCGTGAGGGAATGGTGCCCCGACTTTGAACTTCTTTCCTTCACACGCACGACGtcttcttctTGTGGTACACGTCTTCTTCCCATGGTGCACTCCTTCAAGAGGGATCCTAGCATAGCTACACgagagagagaAGAGgagagaGgagagaGgagagagaTACGACGGCTAAGATTTTAGGAGAACAAAGCTCAtctctcA	ACCAGCCTCTGATTTCTGCA	TGAGAGATGAGCTTTGTTCTCC	149	45	21	20	266	22	59.305	57.801	4.41	3.71	4.8942	F	323	ACACATCCTTCTCAGCTATGACCAGCCTCTGATTTCTGCACCTTGTGTTAGATGCTACAGACCATCGCGTGAGGGAATGGTGCCCCGACTTTGAACTTCTTTCCTTCACACGCACGACGtcttcttctTGTGGTACACGTCTTCTTCCCATGGTGCACTCCTTCAAGAGGGATCCTAGCATAGCTACACgagagagagaAGAGgagagaGgagagaGgagagagaTACGACGGCTAAGATTTTAGGAGAACAAAGCTCAtctctcATTGATCACAAAATCAATCTGGGTATTTATACCCATTACAAATTAGTTCAATAAACCA
	M00842:287:000000000-BGGT4:1:1104:10578:7810	1	94	10	5	1	AT	TATATATATA	NA	1	1	3	43	165	GGTTTAGGCTTCCAGATATTCGCTATCTGAATTCAATtatataTTATATTATAAAATTTATACATATAAatatatTTATGAATGATAGGtatatatataTTTTAGTTGTATTTCAAAAGAATACCTTCTAAAACTATGACTTGGAATCGGAACATAACACCATGT	GGTTTAGGCTTCCAGATATTCGC	ACATGGTGTTATGTTCCGATTCC	66	43	5	23	169	23	59.501	59.055	4.7	3.01	7.44406	B	175	AAAGGGTTTAGGCTTCCAGATATTCGCTATCTGAATTCAATtatataTTATATTATAAAATTTATACATATAAatatatTTATGAATGATAGGtatatatataTTTTAGTTGTATTTCAAAAGAATACCTTCTAAAACTATGACTTGGAATCGGAACATAACACCATGTATAAAA
	M00842:287:000000000-BGGT4:1:1104:10808:25480	1	40	10	5	1	AG	AGAGAGAGAG	NA	1	1	4	14	133	TCAAGTTAGTGGGAGTGGCAACaaaaaGAATACAagagagagagggggggAGGGAGAGTAGAGTAGAAAGGAGTTCAGAGTGTCCCCttttttCCAAGAGGAAAGcccccTTTCTATCGGAGTTGGGTCCTCT	TCAAGTTAGTGGGAGTGGCA	AGAGGACCCAACTCCGATAGA	14	68	6	20	138	21	58.57	59.43	4.92	1.98	2.99948	F	288	GACGATCAAGTTAGTGGGAGTGGCAACaaaaaGAATACAagagagagagggggggAGGGAGAGTAGAGTAGAAAGGAGTTCAGAGTGTCCCCttttttCCAAGAGGAAAGcccccTTTCTATCGGAGTTGGGTCCTCTTTTATAGAAAGTTCATGGAGCCATCCGTGGACGGCGTGAGGTCAATaaaaaCGACAATAAATAAATTAGGAAGTGATAGCTATTACTGTCGCCGTATACATCCAACATTGACTGATAGTGACCATGTCTCTGTCACCGTATATGTCCAAT
	M00842:287:000000000-BGGT4:1:1104:10941:27528	1	170	10	5	1	AG	AGAGAGAGAG	NA	1	1	2	118	299	GGTGAAGATGGAATAGTGGCTGTTATCTCCTTCCTGGGAGCAGGGAACCCTGCAATGAAGTCCTCTGGTTGGATATAGTTCTGGTGAGGATCCTCTGATGATTAAGTTAGCAATAAGGCAACAGTAGTTGTATCAAGAAAagagagagagAATGTAAGTATGAGTGACTTAGCCCttttttGGAGATCAAAGAGGTCCTTTTATGTAGAATCGGCCGGAGAATACGAGAAGAATCTTTTCGTTTGGATCGTCCCACGATTTGAGTAGTGGAAATAACTATGTACTGGTGTAATCGCCCG	GGTGAAGATGGAATAGTGGCTG	CGGGCGATTACACCAGTACA	118	129	30	22	328	20	58.791	59.826	4.85	2.9	3.38334	F	328	GACGTGGCGATGGGCTCCAACTGGCACGTGGTGAAGATGGAATAGTGGCTGTTATCTCCTTCCTGGGAGCAGGGAACCCTGCAATGAAGTCCTCTGGTTGGATATAGTTCTGGTGAGGATCCTCTGATGATTAAGTTAGCAATAAGGCAACAGTAGTTGTATCAAGAAAagagagagagAATGTAAGTATGAGTGACTTAGCCCttttttGGAGATCAAAGAGGTCCTTTTATGTAGAATCGGCCGGAGAATACGAGAAGAATCTTTTCGTTTGGATCGTCCCACGATTTGAGTAGTGGAAATAACTATGTACTGGTGTAATCGCCCG
	M00842:287:000000000-BGGT4:1:1104:12288:7927	1	63	26	5	2	AC	ACACACACACTGATCATCTCTCTCTC	NA	1	1	3	8	201	TCGTTCCCTTCTTCCTCATCGTAAGGTTTacacacacacTGATCAtctctctctcTTGCAGCTGTACAAAACATTGATGATCATCTCTGTTTCATGGTTGATTTGAAACCAGGAAAGATCTaaaaaTTGGTGTTTGGTTTTGTGAGAAACATTGCCAAGAAAGATCTAGTTTCTTCAATCTAGAAATAGCACCATGGACAA	TCGTTCCCTTCTTCCTCATCG	TTGTCCATGGTGCTATTTCTAGA	8	123	34	21	234	23	59.523	57.308	3.84	2.43	7.16901	G	236	CATtctctcCTCTCCCTCATGCctctctctctTTCGTTCCCTTCTTCCTCATCGTAAGGTTTacacacacacTGATCAtctctctctcTTGCAGCTGTACAAAACATTGATGATCATCTCTGTTTCATGGTTGATTTGAAACCAGGAAAGATCTaaaaaTTGGTGTTTGGTTTTGTGAGAAACATTGCCAAGAAAGATCTAGTTTCTTCAATCTAGAAATAGCACCATGGACAAAG
	M00842:287:000000000-BGGT4:1:1104:12309:24692	1	226	12	6	1	AG	TCTCTCTCTCTC	NA	1	1	3	11	112	aaGAAATCCCAGGAAGAACCCCATTTAtttttttCATTGCAAAGTCTTCTTaaaaaaCCTTCTTTGAAtctctctctctcCCtttttATAAACCCTAATGTTGGACACCACT	AAGAAATCCCAGGAAGAACCC	AGTGGTGTCCAACATTAGGGT	47	11	158	21	269	21	57.542	58.937	4.11	4.34	5.52068	F	321	TCATTTGAAAGTTaaaaaaaaaaaaaaaGGTACCAGTGCCAAAACCTGTCACAATCTTCAATCtttttGAGTGAATCAGCTCACTCCTTTGGAAGATCCTTTTCCTTGTTAGATATTACAAGGAAAGCAACAAGAGAtttttGCTAAAGTGATaaaaaaGAAATCCCAGGAAGAACCCCATTTAtttttttCATTGCAAAGTCTTCTTaaaaaaCCTTCTTTGAAtctctctctctcCCtttttATAAACCCTAATGTTGGACACCACTTTTACATTTCCTAATAAATCTAGAGGGATAATCATGGATGTTGGGCACCTAA
	M00842:287:000000000-BGGT4:1:1104:12487:7097	1	193	20	10	1	AT	ATATATATATATATATATAT	NA	1	1	3	19	233	CAACAAGCAAACAGGCTGGAACTCCTTAAAATGAAGAAAatatatatatatatatatatAAAGAAACTCAATAAACATTGCGATACTTATAGATCCAGTtatataCTGACAAAAGGATAAAAGAAAATACTCCAACATAAATAATCCAATATTCTTATAGATCCTGTCATGATTCATGCACAACAGCAtttttCAAGGGCACTTTTCAATAGAGTTTGACAGAGTTGAACCCA	CAACAAGCAAACAGGCTGGA	TGGGTTCAACTCTGTCAAACTCT	19	151	154	20	386	23	59.254	59.8	3.86	3.24	3.94601	F	450	TGATGCAATGGTTTTATGAAATTTCAACAATTATCACTTAGAAAATTATAATGTaaaaaaGAGTGAAATGTAGATAATTCCCTATAATGTAAACTAAAGTGAAATATGATTTGATGCATGACACTAAACACAAAATTATAGAATGATGATTAGCAACAAGCAAACAGGCTGGAACTCCTTAAAATGAAGAAAatatatatatatatatatatAAAGAAACTCAATAAACATTGCGATACTTATAGATCCAGTtatataCTGACAAAAGGATAAAAGAAAATACTCCAACATAAATAATCCAATATTCTTATAGATCCTGTCATGATTCATGCACAACAGCAtttttCAAGGGCACTTTTCAATAGAGTTTGACAGAGTTGAACCCAATTAAAGAACAAC…
	M00842:287:000000000-BGGT4:1:1104:12780:7837	1	286	12	6	1	AT	TATATATATATA	NA	1	1	3	3	300	AGCAACTATGAGGCTATTTAAGTCAAAAGAGaaaaaTCCAGATTACCTGGATAAACACTAATTGTTGTGGCAATCTGGATTGCCACATGAGAGGCAATCCAGATTACCACAACAGAATAAATTGCCACCTTGTTTGGTACACCAAACAAACTAATAGAAGGGGCCCACTTAAAATTGCTAGCAATCTAGATAGATTGCCAGCTACCAAATGGGTCCTAAGATCTTGAGCTGTTAGATCTTGATCTAACAGCTAAAATGGTtatatatatataTTATGGGATAGGTATTTGATGGAAGAAA	AGCAACTATGAGGCTATTTAAGTCA	TTTCTTCCATCAAATACCTATCCCA	235	3	26	25	325	25	58.111	57.78	3.41	4.37	14.1088	F	394	GTGGGTTTTCCAtttttATTCACGAAGCAACTATGAGGCTATTTAAGTCAAAAGAGaaaaaTCCAGATTACCTGGATAAACACTAATTGTTGTGGCAATCTGGATTGCCACATGAGAGGCAATCCAGATTACCACAACAGAATAAATTGCCACCTTGTTTGGTACACCAAACAAACTAATAGAAGGGGCCCACTTAAAATTGCTAGCAATCTAGATAGATTGCCAGCTACCAAATGGGTCCTAAGATCTTGAGCTGTTAGATCTTGATCTAACAGCTAAAATGGTtatatatatataTTATGGGATAGGTATTTGATGGAAGAAATTTTCTTTTGAAATGAAATATTGGACCCAttttttGACCACAtttttttCaaaaaaTTTTCTAATGCCA
	M00842:287:000000000-BGGT4:1:1104:12974:4624	1	198	22	11	1	AT	ATATATATATATATATATATAT	NA	1	1	12	61	189	GCATGTATCATGAGCCAAGTGGTATGACTATACGCATTAAGGTTTCTTATTCAatatatTATATGAGCCAAGTGGAAGAATGTAAatatatatatatatatatatatGACTCAAATGATATCAAGAGATATGTCTCTTAATAATTAACGATATGTCAAAATTATATTTGGCTAATGAAGAGATGTGGCC	GCATGTATCATGAGCCAAGTGG	GGCCACATCTCTTCATTAGCC	63	61	113	22	301	21	59.707	58.775	4	3.93	4.51804	B	355	ATTAATATTTCTATTTAATAGTGATATTGTAGTATAGACAATATAAGTAGGATTTTGATATGGTATGACTATGCGCATTAAGGTTTCTTATTAAATCATGAGCCAAGTGGGAGCATGTATCATGAGCCAAGTGGTATGACTATACGCATTAAGGTTTCTTATTCAatatatTATATGAGCCAAGTGGAAGAATGTAAatatatatatatatatatatatGACTCAAATGATATCAAGAGATATGTCTCTTAATAATTAACGATATGTCAAAATTATATTTGGCTAATGAAGAGATGTGGCCTTTTGGGAAATAAAGAGACTTATCTTTGTAGGAAATGCAGAGATGTGTCTCTTT
	M00842:287:000000000-BGGT4:1:1104:12982:15075	1	73	12	6	1	AT	TATATATATATA	NA	1	1	3	5	99	ACGTGgagagaTCTGTAGCCTATGCATTCGAACCGATGTCGATCTTGACCATCGAGGTTGACtatatatatataGGCAGAGGGAGAAGGGCTTGAGGAt	ACGTGGAGAGATCTGTAGCCT	ATCCTCAAGCCCTTCTCCCT	41	5	11	21	109	20	60.064	59.955	4.58	4.2	1.10978	F	151	GAtttttGACACGTGgagagaTCTGTAGCCTATGCATTCGAACCGATGTCGATCTTGACCATCGAGGTTGACtatatatatataGGCAGAGGGAGAAGGGCTTGAGGAtttttttttCTTCCTCTAACGATCATTTGCAGAGAATGTATTC
	M00842:287:000000000-BGGT4:1:1104:13097:8974	1	283	10	5	1	AG	TCTCTCTCTC	NA	1	1	2	79	235	TCCAGCAGCACAAGGGTTAGACATTCCTCTACTATAGATTCCTCTATTGGACACTCCTCCATTGGACCGCTATCCATCTCCTTCCTCCCTgagagaGTGTACAAATACACTTCTCAACTTCATCTTtctctctctcACTTTAttgttgttgCCACTCACACTGACTTGAGTATCAGAGGATCCCCATCAAAGCAATCTCTGGTGAGGACTTCTTTGCAGGTGTGCTACTATCGCT	TCCAGCAGCACAAGGGTTAG	AGCGATAGTAGCACACCTGC	106	79	157	20	391	20	59.963	59.897	2.34	4.85	0.13994	B	422	CCATAACATAAATTCCCTTTCCATCAACTAGTGCGGCATGGGCAAAGTCAGTGGAGTCATCACCTCTCATTTATGATCCACTCATGATATCACTAGCTCAGCCTGCCATGCAGCTTTCTCATAGGCCctctctTGCTTCTTTATAAAGGGAcccccTCCAGCAGCACAAGGGTTAGACATTCCTCTACTATAGATTCCTCTATTGGACACTCCTCCATTGGACCGCTATCCATCTCCTTCCTCCCTgagagaGTGTACAAATACACTTCTCAACTTCATCTTtctctctctcACTTTAttgttgttgCCACTCACACTGACTTGAGTATCAGAGGATCCCCATCAAAGCAATCTCTGGTGAGGACTTCTTTGCAGGTGTGCTACTATCGCTGGGAGCAC…
	M00842:287:000000000-BGGT4:1:1104:13292:22680	1	67	18	9	1	AG	CTCTCTCTCTCTCTCTCT	NA	1	1	3	28	138	TGATTCTCTTTCCTATTCATTCCCTTaaaaaTTGTTAGCAAttttttCTCTCCctctctctctctctctcttttttAACTTATTCCCATTATATTCTACTTTTCAAAATACAACCATAACAATGAACATTAGTGTCCC	TGATTCTCTTTCCTATTCATTCCCT	GGGACACTAATGTTCATTGTTATGG	28	42	14	25	151	25	57.543	58.205	4.2	2.74	14.2528	F	158	ATTCTAAAATTCTTGATTCTCTTTCCTATTCATTCCCTTaaaaaTTGTTAGCAAttttttCTCTCCctctctctctctctctcttttttAACTTATTCCCATTATATTCTACTTTTCAAAATACAACCATAACAATGAACATTAGTGTCCCTACATTT
	M00842:287:000000000-BGGT4:1:1104:13969:12914	1	68	14	7	1	AG	AGAGAGAGAGAGAG	NA	1	1	2	12	115	TGAAGACCCTCCGACACTCAAGTCAGCAGAACTGACAACAGTAATAAAAGAGAAAGTATGTAGAGAagagagagagagagGGTTGTGGATTTCGTGAAATGAGATGGGATTCTCG	TGAAGACCCTCCGACACTCA	CGAGAATCCCATCTCATTTCACG	46	12	2	20	116	23	60.179	59.508	3.41	4.35	3.67136	A	131	GTGAAGACCCTCCGACACTCAAGTCAGCAGAACTGACAACAGTAATAAAAGAGAAAGTATGTAGAGAagagagagagagagGGTTGTGGATTTCGTGAAATGAGATGGGATTCTCGATTTGAATATCTATG
	M00842:287:000000000-BGGT4:1:1104:13986:12263	1	273	30	15	1	AT	TATATATATATATATATATATATATATATA	NA	1	1	4	66	292	ACCTTGTGGTGTCCCAATGGGCCCTTCATCCACATCGGGTGTGACCCAACCCTCCTTAGGCAATTTGGCAGCAACATGGACCAatatatCTAAGGGGCTCAACTTACCTTGTATCCCAAATTTTATAATTACTTTGGTAGGTAATACTTTTAGAAatatatGATCATCAATtatatatatatatatatatatatatatataTGAATTTCTTTCCTTTATTAAATTGCTTaaaaaTGTACAATCAAATATGCAATGTTCAATATTTTGTGTCCCTAATCCAATCATAACAAGT	ACCTTGTGGTGTCCCAATGG	ACTTGTTATGATTGGATTAGGGACA	151	66	102	20	393	25	60.179	58.031	3.16	4.02	7.14801	F	450	ACTCTAtttttATTCTCTTCCCACTGTTAACCAAACCCTTGACTTAAGCATCGGAGGGTcccccGCTGGaaaaaCTCCTACAAGCAGACTTCCTTTGTAGGACCTTGTGGTGTCCCAATGGGCCCTTCATCCACATCGGGTGTGACCCAACCCTCCTTAGGCAATTTGGCAGCAACATGGACCAatatatCTAAGGGGCTCAACTTACCTTGTATCCCAAATTTTATAATTACTTTGGTAGGTAATACTTTTAGAAatatatGATCATCAATtatatatatatatatatatatatatatataTGAATTTCTTTCCTTTATTAAATTGCTTaaaaaTGTACAATCAAATATGCAATGTTCAATATTTTGTGTCCCTAATCCAATCATAACAAGTATTAGC…
	M00842:287:000000000-BGGT4:1:1104:14816:5554	1	77	23	7	1.5	AG	GAGAGAGAAAGAGAGAGAGAGAG	NA	1	1	7	33	208	tcttcttctCTTTGGCAACCCCAAACCATCATCagagagTAAGAAagagagTGTgagagagaAagagagagagagagACATAGCCTTCTTTCCTTCTCTGTTCTTCTCCTTCTCTTTCCTTCCTTTTCCCTTCttttttttCtttttCTttcttcttcAtttttttttCTCTTTCCTACCTTGGCCGACCCATGGGTGCTGTGAATCC	TCTTCTTCTCTTTGGCAACCC	GGATTCACAGCACCCATGGG	33	111	23	21	230	20	58.136	61.039	4.11	4	3.90304	F	236	TTCTCCTCCTTTAttttttttAtcttcttctCTTTGGCAACCCCAAACCATCATCagagagTAAGAAagagagTGTgagagagaAagagagagagagagACATAGCCTTCTTTCCTTCTCTGTTCTTCTCCTTCTCTTTCCTTCCTTTTCCCTTCttttttttCtttttCTttcttcttcAtttttttttCTCTTTCCTACCTTGGCCGACCCATGGGTGCTGTGAATCCCCTAAT
	M00842:287:000000000-BGGT4:1:1104:15085:23367	1	260	34	17	1	AC	TGTGTGTGTGTGTGTGTGTGTGTGTGTGTGTGTG	NA	1	1	3	55	233	ATCCCATGGCATATTGGGAATAATACTGTCttttttGCAGATGCTAGAGGATATTCAAGCTCAAGTTGGGCTTCTTATTATAAGCAGCAATATTATCACAAAAGTGTTGACTAAAATCATCCCCtgtgtgtgtgtgtgtgtgtgtgtgtgtgtgtgtgTAAGCTCATGGGTCATTAAATTAGGAGCATGAGTCCATAGTTTAAGTCATTCCTGAGCTCCAGTCGTATGGGTGT	ATCCCATGGCATATTGGGAAT	ACACCCATACGACTGGAGCT	103	55	136	21	368	20	57.141	60.615	3.01	4.09	4.47367	F	380	GATTCTTGGACCTACTTTCTATACCTAATCATCTACTTTATTTTAATAAGAACACCATAAACTCCCTGCACTAACCAAAGCATTTCACCAAAAGgtgtgtgtCATCACCAGAGGATAAGACAGTGGTTATGTTTTATCCCATGGCATATTGGGAATAATACTGTCttttttGCAGATGCTAGAGGATATTCAAGCTCAAGTTGGGCTTCTTATTATAAGCAGCAATATTATCACAAAAGTGTTGACTAAAATCATCCCCtgtgtgtgtgtgtgtgtgtgtgtgtgtgtgtgtgTAAGCTCATGGGTCATTAAATTAGGAGCATGAGTCCATAGTTTAAGTCATTCCTGAGCTCCAGTCGTATGGGTGTAACAAGGAGAAT
	M00842:287:000000000-BGGT4:1:1104:15376:2009	1	80	10	5	1	AG	CTCTCTCTCT	NA	1	1	2	37	140	GGTAGGTGTTTGAAGCGAAGGTTCGATGATGtttttAGGCTCGTGTGCTTTGTAATAGTTTGGTTGCATTCCCctctctctctATCATGcacacacaTGACcacacacaTGCATGCATGTGCACCGTCTATGGCCAAATG	GGTAGGTGTTTGAAGCGAAGG	CATTTGGCCATAGACGGTGC	52	37	7	21	146	20	59.195	59.618	3.46	5.01	2.18655	F	180	CAAGTTGGTAGGTGTTTGAAGCGAAGGTTCGATGATGtttttAGGCTCGTGTGCTTTGTAATAGTTTGGTTGCATTCCCctctctctctATCATGcacacacaTGACcacacacaTGCATGCATGTGCACCGTCTATGGCCAAATGAATCTGGCAATCCACATGCCAATTGGTGTAAACT
	M00842:287:000000000-BGGT4:1:1104:15742:24798	1	127	38	19	1	AG	GAGAGAGAGAGAGAGAGAGAGAGAGAGAGAGAGAGAGA	NA	1	1	4	92	291	GGGCTTACCTTGGCTTGGTAGTCGTCGGCGACAATGCTCCCCTGGTGGTCGGGAACAAACCTTCACTCGAACGGCGGTAGGTCCTTCACTTGGACAACAATGGAAAAGAAACgagagagagagagagagagagagagagagagagagagaGCAAGAGGGAGTTCGAGTAGAGGGTTTCATCCCTtctctcGATCTTCTCAGAAATATcccccTCCCCTGCCTTGCCCGATGTTCCGTCTTGGGAGCTCCCCAGAAGATTCTAGGGGCTCCGAGAACTCTTCTCGCATGCGT	GGGCTTACCTTGGCTTGGTA	ACGCATGCGAGAAGAGTTCT	92	121	15	20	305	20	59.67	59.755	3.25	3.01	0.575261	F	373	GGAAACCGTCAGAAGGGCTTACCTTGGCTTGGTAGTCGTCGGCGACAATGCTCCCCTGGTGGTCGGGAACAAACCTTCACTCGAACGGCGGTAGGTCCTTCACTTGGACAACAATGGAAAAGAAACgagagagagagagagagagagagagagagagagagagaGCAAGAGGGAGTTCGAGTAGAGGGTTTCATCCCTtctctcGATCTTCTCAGAAATATcccccTCCCCTGCCTTGCCCGATGTTCCGTCTTGGGAGCTCCCCAGAAGATTCTAGGGGCTCCGAGAACTCTTCTCGCATGCGTGCATAGGCAATGCATGCAAGGGCCCtttttGGCCAGTTTTAGCTGGGCCGGGTTCTCATGGGCCAGTC
	M00842:287:000000000-BGGT4:1:1104:16319:6872	1	124	36	5	2	AT	TATATATATATGTATATATGTATGTATGTATGTATG	NA	1	1	3	48	220	TGATGCATGATGTCTCGCTCAATGAGATTGTAGTAatatatGTATGTATGTCtatatatatatgtatgtatgtatgtatgtatgtatgtatgtatgtatgtatatataTGTATATGtatatatataTGTATAtatgtatgtatgtatgtatgTTTGTATGTATAGATGACTTGGTTGAAtgtgtgCGGATGATCGGCTCTGAATTGTGCCGTGTTGGTGG	TGATGCATGATGTCTCGCTCA	CCACCAACACGGCACAATTC	95	48	8	21	227	20	59.863	60.319	4.26	2.17	1.45609	D	386	ACTTATGTGATGCATGATGTCTCGCTCAATGAGATTGTAGTAatatatGTATGTATGTCtatatatatatgtatgtatgtatgtatgtatgtatgtatgtatgtatgtatatataTGTATATGtatatatataTGTATAtatgtatgtatgtatgtatgTTTGTATGTATAGATGACTTGGTTGAAtgtgtgCGGATGATCGGCTCTGAATTGTGCCGTGTTGGTGGGTTaaaaaGAACCAACCAAACGGTCATCGCGGACGGTCGGCAATGCTTGTATCGGGAACTTTGAAATTTGAACGTTGAGTCTCCAGCGAGAAGAAATTATATCCTGCGACGCGCACCACGTGAGCGGCTATTGCGGACGGTCGGCAATGTTTATACCGT
	M00842:287:000000000-BGGT4:1:1104:17253:18641	1	53	16	8	1	AT	ATATATATATATATAT	NA	1	1	2	3	117	TCCTCCTCAATACAAACCCACCATAatatatatatatatatGGAACATGAagagagCGCAATACTTTCCTATAGTACTCATTAAAGTGTTaaaaaCATAAGCTTGTTTAGTGTTGCT	TCCTCCTCAATACAAACCCACC	AGCAACACTAAACAAGCTTATGTT	3	52	28	22	144	24	59.692	57.609	4.61	2.71	8.69891	F	234	CAATGACTACCGATATGATAGTACTTTTCCTCCTCAATACAAACCCACCATAatatatatatatatatGGAACATGAagagagCGCAATACTTTCCTATAGTACTCATTAAAGTGTTaaaaaCATAAGCTTGTTTAGTGTTGCTTATTATTTACCATTTTAtttttAAAAGTTTaaaaaGaaaaaTAAAATAGACTGAGCAACATATTTGATAATTCCACTACATAAATGGCCA
	M00842:287:000000000-BGGT4:1:1104:17316:4527	1	115	14	7	1	AT	TATATATATATATA	NA	1	1	11	40	175	AAGAAACTAGGCCAGGGATATTTTCATAAAATTTTaaaaaaTTTAAATATTTGCTGGTAGCTGtatatatatatataTGTATGTAACATAACCAGATAAACTAGGTTATAACAACAAATATaaaaaaTAAGTATTATTTCTACTTACTGtttttAACAAACTAGGCTAGGTGCAT	AAGAAACTAGGCCAGGGATATTT	ATGCACCTAGCCTAGTTTGTT	40	77	52	23	226	21	57.266	57.279	1.4	2.83	9.45512	F	340	TAAGTTATGATAACAAATATaaaaaaaaCCTAATTTATACTCACTAtttttAAGAAACTAGGCCAGGGATATTTTCATAAAATTTTaaaaaaTTTAAATATTTGCTGGTAGCTGtatatatatatataTGTATGTAACATAACCAGATAAACTAGGTTATAACAACAAATATaaaaaaTAAGTATTATTTCTACTTACTGtttttAACAAACTAGGCTAGGTGCATTATTGGATTTTGaaaaaaaTTAAATATTTGCTGATAGTTGTATACATGTATGTACGTAACATGACTAGATAAACTAGGTTATGATAACAAATTTaaaaaaaaTTATCTATACTT
	M00842:287:000000000-BGGT4:1:1104:17973:18688	1	42	14	7	1	AG	GAGAGAGAGAGAGA	NA	1	1	6	14	119	GAGGGTGAGGgagagaGTGAGAAGAGGCAGTTAGgagagagagagagaGGAGGGGCCGAATGTCCATTCGGCTCCCCTTTcccccTCCACTACCCCTCATCGACCTGTCTCGAGAGCTC	GAGGGTGAGGGAGAGAGTGA	GAGCTCTCGAGACAGGTCGA	14	51	8	20	126	20	59.667	60.742	3.41	4.2	1.07489	F	188	GAGACAGGAGGGTGAGGgagagaGTGAGAAGAGGCAGTTAGgagagagagagagaGGAGGGGCCGAATGTCCATTCGGCTCCCCTTTcccccTCCACTACCCCTCATCGACCTGTCTCGAGAGCTCCCCAGAAGGTTCTGGGGCTCTTGAGAACCTCCCCTCGCACGTgctcgctcgctcGCACGTGC
	M00842:287:000000000-BGGT4:1:1104:18063:10666	1	89	31	8	1.5	AG	TTCTTCTTCTTCTTCTCTCTCTCTCTCTCTC	NA	1	1	3	1	139	CAAAGTCATGTGCACCAATAATCTTttcttcttcttcttctctctctctctctctcTTTGGTAAGTGAATGAACTTATCTTCTTGATGCAATTATAAACCTAATAACAAAATGACCATAGTAAAGCATGGTCCATCACA	CAAAGTCATGTGCACCAATAATCT	TGTGATGGACCATGCTTTACT	1	62	64	24	202	21	58.042	57.281	2.4	2.24	9.67707	B	240	CATTCGCCACGTCCCATGGAAGGTTGATATTGTGCTCCTATGTTTCTAAAGTCCCTTaaaaaaCAAAGTCATGTGCACCAATAATCTTttcttcttcttcttctctctctctctctctcTTTGGTAAGTGAATGAACTTATCTTCTTGATGCAATTATAAACCTAATAACAAAATGACCATAGTAAAGCATGGTCCATCACATCTTTTGTACATTCAAATTACAACAAACGTACTAATGT
	M00842:287:000000000-BGGT4:1:1104:19925:13685	1	67	18	9	1	AG	TCTCTCTCTCTCTCTCTC	NA	1	1	4	43	158	TGAGGTAAGTGGTGAACTCCATCTATGGtttttCCTCGAATTAGTTCATTCCGCTTGTAATTTAtctctctctctctctctcTTTCTCCCCATGGAATCAGCTACTTTGATCTTTCCCTTATAAtttttGAGTGTGGGGTGGAATAGAAACCATGGAA	TGAGGTAAGTGGTGAACTCCA	TTCCATGGTTTCTATTCCACCC	43	54	3	21	160	22	58.315	58.024	3.86	4.61	6.66096	F	224	GATGAGGTAAGTGGTGAACTCCATCTATGGtttttCCTCGAATTAGTTCATTCCGCTTGTAATTTAtctctctctctctctctcTTTCTCCCCATGGAATCAGCTACTTTGATCTTTCCCTTATAAtttttGAGTGTGGGGTGGAATAGAAACCATGGAATTGATTGTTATTCATGTTTATAATAGATTCTGGGtttttGttcttcttcAAGCTTGATTCCAGA
	M00842:287:000000000-BGGT4:1:1104:20160:16218	1	169	36	18	1	AT	ATATATATATATATATATATATATATATATATATAT	NA	1	1	3	29	166	CCCACAAACCCATACAAAGCCTTGaaaaaaataaataaataaaCATGTTCTTGTTTAATAGTTTAATAGCATAGATGCatatatatatatatatatatatatatatatatatatAATCTACCTACCTTGTACaaaaaCAAAATACTACCAACTATACACCTGCATC	CCCACAAACCCATACAAAGCC	GATGCAGGTGTATAGTTGGTAGT	57	29	91	21	256	23	59.725	57.722	4.35	2.73	6.55287	F	263	GTAGATCGGAAGAGCCAATACAAGGTGTCATGCCCCATGACCCAAGCATGAGGGGCCCAGAACACCTAGCCATGTGAATTTGCAGGTTTACCCACAAACCCATACAAAGCCTTGaaaaaaataaataaataaaCATGTTCTTGTTTAATAGTTTAATAGCATAGATGCatatatatatatatatatatatatatatatatatatAATCTACCTACCTTGTACaaaaaCAAAATACTACCAACTATACACCTGCATCTATGCTA
	M00842:287:000000000-BGGT4:1:1104:21464:16257	1	95	36	5	1.5	AG	GAGAGAGAGAAAAGAGAGGAAGAAGAAGAAGAGAGA	NA	1	1	5	22	125	TTCatgatgatgGTGAGCCCCAAAATAAGGCACAATGATGAAATTCgagagagagaAAagagaggaagaagaagaagagagaAAAGAGATGAAGaaaaagaagaagaaATgagagaGGCTCGTGT	TTCATGATGATGGTGAGCCC	ACACGAGCCTCTCTCATTTCT	26	22	49	20	173	21	57.647	58.825	5.19	2.52	4.52856	F	175	ATCAGATAAGATGGTGGTGCATAATAACTCTTCTCTAGaaaaaaCTCATTCatgatgatgGTGAGCCCCAAAATAAGGCACAATGATGAAATTCgagagagagaAAagagaggaagaagaagaagagagaAAAGAGATGAAGaaaaagaagaagaaATgagagaGGCTCGTGTTT
	M00842:287:000000000-BGGT4:1:1104:21495:14418	1	100	26	13	1	AG	TCTCTCTCTCTCTCTCTCTCTCTCTC	NA	1	1	5	3	106	TAACATAGCAGGCCAGCCACTGTtctctctctctctctctctctctctcTAATATTCAGGTTGTGGACGaaaaaTATTTAAGATAAATGCTCAACACGGCATTCAC	TAACATAGCAGGCCAGCCAC	GTGAATGCCGTGTTGAGCAT	3	37	77	20	182	20	60.107	59.477	5.01	3.79	0.630286	F	192	TATCATAGTTTATACAttttttCCATTGAGGGAAAAGATGTAACTAGGTTCATGAAATAGATCCAATTACTGAAATTAACATAGCAGGCCAGCCACTGTtctctctctctctctctctctctctcTAATATTCAGGTTGTGGACGaaaaaTATTTAAGATAAATGCTCAACACGGCATTCACCATAGCAGTG
	M00842:287:000000000-BGGT4:1:1104:21580:21889	1	291	10	5	1	AT	ATATATATAT	NA	1	1	4	44	161	CACTATGGCGTGGTGGGTTAGACCCCAGTCACGTGTCTATAAGGCCAAAGAGGACAATACCTCATTGATAGTTGatatatTACAGatatatatatTGTTGCATGATTATATTATACTTTACATTTTCATTATTTATTCATGCATATTTCATTGGGCCATGt	CACTATGGCGTGGTGGGTTA	ACATGGCCCAATGAAATATGCA	65	44	206	20	366	22	59.749	58.96	2.85	3.96	3.29054	F	476	CCAGGGGTAGGAGAATACCAAAGAAGTCTTGACTGGCGGGCAAGATTGAGCCAGTGAGCCTTGACCTAGTGGGCATAGAAAATAACTAGGCGAGCCAACGCGTCTTGAGTTAAGTATGTATTGAGCAGACTATTATGACAGCGGGAAACAAGAAAGAGAATAAGTCGAGGTACCCTTTGGCTAagagagCGTGATTTCGCCATTGCACTATGGCGTGGTGGGTTAGACCCCAGTCACGTGTCTATAAGGCCAAAGAGGACAATACCTCATTGATAGTTGatatatTACAGatatatatatTGTTGCATGATTATATTATACTTTACATTTTCATTATTTATTCATGCATATTTCATTGGGCCATGtttttATTATACAGTTAGTATTGATGTTATTTAT…
	M00842:287:000000000-BGGT4:1:1104:22379:15115	1	231	10	5	1	AC	ACACACACAC	NA	1	1	4	83	233	CCCATATTGAGCACTTGTTACAGACTACTAAAGCAATCAAGGACTATCTTGATGAGGATTGGTTGCACTTAACTGGACTAATTCATGGTATGATccccccTTcccccAacacacacacaaaaaaaaaaCTAAAGCCTCTAGTGAAATTTaaaaaCAATTAGTTAGATTTATTGATGCATTGTTGCTCATCTGACCATTGAAATAAtttttCTTCAAAGCCATTCCTATCAGCT	CCCATATTGAGCACTTGTTACAGAC	AGCTGATAGGAATGGCTTTGA	83	94	123	25	355	21	59.935	57.06	3.51	2.69	9.00496	F	392	GGTTCAGGTGAAGAGGATgggggAAGAGTATGGCAAGTTGGGTAGGGTGGAAATGAGCATTTGGGAATGCATTGAGCTGCTCAATGAGTTTATTAATGACAATGATCCAAATCTGGATGAGCCCCATATTGAGCACTTGTTACAGACTACTAAAGCAATCAAGGACTATCTTGATGAGGATTGGTTGCACTTAACTGGACTAATTCATGGTATGATccccccTTcccccAacacacacacaaaaaaaaaaCTAAAGCCTCTAGTGAAATTTaaaaaCAATTAGTTAGATTTATTGATGCATTGTTGCTCATCTGACCATTGAAATAAtttttCTTCAAAGCCATTCCTATCAGCTAATATAAATATTCTGAATAGTTTAGAAAGTTTCAATG
	M00842:287:000000000-BGGT4:1:1104:22721:8464	1	122	12	6	1	AG	GAGAGAGAGAGA	NA	1	1	2	44	200	TGTCTGAGGGTTGATTCTTTCTCATGATCAACTGCACTTCATGGGACATGGGATGTAGgtgtgtTATGGTGCGATGTGCAGATGAAGAGATGGTTCCCCACAGCAAATCGTGCGTGAGGgagagagagagaTTAGGAtttttCTTgagagaAAAAGACTCAGATTTTATTCCTCTCATCAATTGGTATTACAAGACTGGT	TGTCTGAGGGTTGATTCTTTCTCA	ACCAGTCTTGTAATACCAATTGATG	95	44	3	24	202	25	59.652	57.37	3.27	3.07	11.9781	F	221	AGTGTCTGAGGGTTGATTCTTTCTCATGATCAACTGCACTTCATGGGACATGGGATGTAGgtgtgtTATGGTGCGATGTGCAGATGAAGAGATGGTTCCCCACAGCAAATCGTGCGTGAGGgagagagagagaTTAGGAtttttCTTgagagaAAAAGACTCAGATTTTATTCCTCTCATCAATTGGTATTACAAGACTGGTATTTATACCAATTACAATG
	M00842:287:000000000-BGGT4:1:1104:22967:7887	1	129	16	8	1	AT	ATATATATATATATAT	NA	1	1	3	41	147	GGGTCCACCTGCAATATGTGTATGAAGCCTGTGGGAAAAGACCTATTAAGGACAATTGCAATAAAGTAAatatatatatatatatAAATAGAAATTTAAAACTTCAACTAATCTGGTCcacacaACTGGTCTCTACTTCACCCATGC	GGGTCCACCTGCAATATGTGT	GCATGGGTGAAGTAGAGACCA	48	41	60	21	206	21	60.341	59.445	3.72	4.02	2.89607	B	206	TGTCACAcccccTGATCCAGCACATGGGGCTTGTGACATCCAACCATACAAAATCTGCAGGGTCCACCTGCAATATGTGTATGAAGCCTGTGGGAAAAGACCTATTAAGGACAATTGCAATAAAGTAAatatatatatatatatAAATAGAAATTTAAAACTTCAACTAATCTGGTCcacacaACTGGTCTCTACTTCACCCATGC
	M00842:287:000000000-BGGT4:1:1104:22977:25459	1	37	15	5	1	AAG	AAGAAGAAGAAGAAG	NA	1	1	4	14	90	CACATGAGTCTCAGCTAGGAGCCGCATCACCGTGAAaagaagaagaagaagACGACGACACTACCTCGTCGCCCTCTATGACTCCATGGG	CACATGAGTCTCAGCTAGGAGC	CCCATGGAGTCATAGAGGGC	14	19	1	22	90	20	60.224	59.31	4.7	5.19	2.91341	A	175	CACATGAGTCTCAGCTAGGAGCCGCATCACCGTGAAaagaagaagaagaagACGACGACACTACCTCGTCGCCCTCTATGACTCCATGGGATCAAGAAGATGACGAGAAACAAGAAACCTTTCCCCTCGCTTGGGTGAGTGGGGAGGTGGAGTTGGGGTTTGCCTCGTCGAGGTG
	M00842:287:000000000-BGGT4:1:1104:22996:19442	1	276	14	7	1	AG	CTCTCTCTCTCTCT	NA	1	1	3	28	240	TCCCATGTACATCATCCCACCTTCCCACGCCTCTATCATAATTCCCCACAGCAACCTcccccTCTCACTCGCTCCTGCTAGAGCGCAAGGACTGACTTTCTTAAAATGTTGCTGTTGCTGCCTCctctctTCCTCTCCTCCATAAACAAGCAGGGACATCATCGGTTAGATTCCCCACctctctctctctctGGAGAGCACCTCATCTGTGACTGCCACTAGCACCTCCATTCGTGAACA	TCCCATGTACATCATCCCACC	TGTTCACGAATGGAGGTGCT	157	28	98	21	337	20	59.226	59.604	4.61	4.4	2.17069	F	349	ATAATAACAAGGAAATATAGGCAAATCCTTTATATTTTAATTTCATATCAAATAAATTCTCAAACCCTTTCTCAATTCTCATGAACCCTTCCAACTATCCCATGTACATCATCCCACCTTCCCACGCCTCTATCATAATTCCCCACAGCAACCTcccccTCTCACTCGCTCCTGCTAGAGCGCAAGGACTGACTTTCTTAAAATGTTGCTGTTGCTGCCTCctctctTCCTCTCCTCCATAAACAAGCAGGGACATCATCGGTTAGATTCCCCACctctctctctctctGGAGAGCACCTCATCTGTGACTGCCACTAGCACCTCCATTCGTGAACATAGCCTATGATC
	M00842:287:000000000-BGGT4:1:1104:24215:25986	1	99	12	6	1	AG	AGAGAGAGAGAG	NA	1	1	3	31	140	ACCTCAATAGTAGCAAGGGTTCTTGGCAGTGGACAATTGCAGTAGAGCAAGCAagagagagagagATGTTTAGACGATTGTGGGAGAGTGGTGgagagaAAGCCCTAGATGgagagagaTGCTCAGATGGGAAAGATTGG	ACCTCAATAGTAGCAAGGGTTC	CCAATCTTTCCCATCTGAGCA	31	54	46	22	185	21	57.511	57.991	3.62	4.26	7.49814	B	447	AGTAGAAGAAGCAAGGTGAGGTGAGGCTTGaaaaaCAAACCACTTACCTCAATAGTAGCAAGGGTTCTTGGCAGTGGACAATTGCAGTAGAGCAAGCAagagagagagagATGTTTAGACGATTGTGGGAGAGTGGTGgagagaAAGCCCTAGATGgagagagaTGCTCAGATGGGAAAGATTGGgagagaTGGCCATGGGGTTATAGGTCATGAACtttttttGATGAattattattCATTGTaaaaaGCTTTGTAATGATGAATTTAGTTTCATTGTTACAAATCTATTCTTTACATTGACAAATTTGTCATTaaaaaTATTTCTTATGATGAAATTAttttttATCATTaaaaaTAGATTTATTATGATGAAATTTCTTTCATCGTAATAATCttt…
	M00842:287:000000000-BGGT4:1:1104:24283:24105	1	67	65	10	2	AT	TACATACATACATACATACATACATATATATATATATATATATAGCCAGTACTTAATATATATAT	NA	1	1	3	42	214	ACGCGcacacaAATATCTTCCTGAGTGGTGTTataataataCaaaaaTATTCaaaaaaaaTGTtacatacatacatacatacatacatatatatatatatatatataGCCAGTACTTAatatatatatGATGCAACATGATGGAAGGATTCGATAGAAAACTTACATAACAGCAGAATAGCTTGTTTGTTTTCTATTTCCCTTCTGCCTCTTGT	ACGCGCACACAAATATCTTCC	ACAAGAGGCAGAAGGGAAATAGA	42	63	4	21	217	23	59.603	59.153	3.46	1.98	5.24358	G	382	ATCACGCGcacacaAATATCTTCCTGAGTGGTGTTataataataCaaaaaTATTCaaaaaaaaTGTtacatacatacatacatacatacatatatatatatatatatataGCCAGTACTTAatatatatatGATGCAACATGATGGAAGGATTCGATAGAAAACTTACATAACAGCAGAATAGCTTGTTTGTTTTCTATTTCCCTTCTGCCTCTTGTATTAACAATCAGCTAATCAATATGATGTTCATTAATGTGaaaaaaaaTTCGACAAGATAAATGTTCCTATGCTGGTCTTATCGATGCATCAAGAATGCATCAATCTATTAACATTGAGTGGTaaaaaTGCACTTTGGCCATGTTCCACTGAAGGATAAGGaaaaa
	M00842:287:000000000-BGGT4:1:1104:24404:24330	1	201	73	7	1.5	ACAT	ACATACATACATACATACATATAATATATATATGTATGTATGTATGTATGTATGTATGTATGTACGTACGTAC	NA	1	1	5	54	296	ACCTTTGCATTGAAATTCATGTTGATTTGATGATTGAATTACTTGCATCATTATTCATGTTTGATTTATGATTGGATTATGGTATACTtatataTCAAAGATTTTATGCCATGATAAGTATTTTCCGTTGGTATGGTTTACATATACAAacatacatacatacatacatATAatatatatatgtatgtatgtatgtatgtatgtatgtatgtacgtacgtacGGGCTTTGATCCAAAAGGTCCCAAGTGATCCAAAAGGTCAATGATCCTGTCGTAAGGCTCCAACTAGGGCATCT	ACCTTTGCATTGAAATTCATGTTGA	AGATGCCCTAGTTGGAGCCT	124	54	52	25	347	20	58.71	60.327	3.18	4.58	6.61683	B	474	CATGTTAGGAAAAGAATTCCTAAACAtttttAACTTTAatatataaaaaTTACCTTTGCATTGAAATTCATGTTGATTTGATGATTGAATTACTTGCATCATTATTCATGTTTGATTTATGATTGGATTATGGTATACTtatataTCAAAGATTTTATGCCATGATAAGTATTTTCCGTTGGTATGGTTTACATATACAAacatacatacatacatacatATAatatatatatgtatgtatgtatgtatgtatgtatgtatgtacgtacgtacGGGCTTTGATCCAAAAGGTCCCAAGTGATCCAAAAGGTCAATGATCCTGTCGTAAGGCTCCAACTAGGGCATCTTGAAGTGTGGAGGAATGGGTTTCTCTATGATCCATCgagagaAGGGTGGTTG…
	M00842:287:000000000-BGGT4:1:1104:24766:23753	1	125	20	10	1	AG	AGAGAGAGAGAGAGAGAGAG	NA	1	1	4	0	139	ACTGTGGGTCCTCAATGCTGCAAGGAGGAGCAGTCACCGACTAAAATTAGGGATTTGAAACTAGAAAGAAATGAGAGCATATGGATGGTTGTTTGGGGAagagagagagagagagagagCTGAGAGCTTGCAGAAGAGT	ACTGTGGGTCCTCAATGCTG	ACTCTTCTGCAAGCTCTCAG	79	0	26	20	164	20	59.963	57.253	4.41	3.35	2.7847	A	195	GACATTGTCGTCTTTTCCTCTGGCGACTGTGGGTCCTCAATGCTGCAAGGAGGAGCAGTCACCGACTAAAATTAGGGATTTGAAACTAGAAAGAAATGAGAGCATATGGATGGTTGTTTGGGGAagagagagagagagagagagCTGAGAGCTTGCAGAAGAGTaaaaaaTACAGagaagaagaGgagagaGTTC
	M00842:287:000000000-BGGT4:1:1104:24816:16434	1	237	14	7	1	AT	ATATATATATATAT	NA	1	1	3	38	243	GGGATCTTGTAGTTTCGGTCAACCATTCAACTATGTGATCATGGCAATATTGTTGTTACatatatatatatatTATCATGATTCTATCTTTtatataATaaaaaTAATAAATTATAATGTTTAGACCATAGCAAAATTGTTGGGTATTGATGATGCAGTAGAAGCATGGATTTTATAAAATTTGTTGGTCAATTATGAAATCCTAGCTAATTATGAAATCTAAGCCATCGAACCCTAACCCAA	GGGATCTTGTAGTTTCGGTCA	TTGGGTTAGGGTTCGATGGC	38	150	178	21	420	20	57.395	60.035	4.02	4.4	3.63974	F	446	CTATATCATAGGAGGAAATTTTAAATGTCATGTTCCAAACCTTGATACTACTGTTGTTGCTGGGCATCATTTATTTTATTCAATAAGAGAAACTTGAAGAGTTTGTAATCCGATTAAGAAGTCAGCATACTAGCATCACTAGTGGCTGTAATTTGTAAATTAGAAAGaaaaaTCATGGGGATCTTGTAGTTTCGGTCAACCATTCAACTATGTGATCATGGCAATATTGTTGTTACatatatatatatatTATCATGATTCTATCTTTtatataATaaaaaTAATAAATTATAATGTTTAGACCATAGCAAAATTGTTGGGTATTGATGATGCAGTAGAAGCATGGATTTTATAAAATTTGTTGGTCAATTATGAAATCCTAGCTAATTATGAAATCTA…
	M00842:287:000000000-BGGT4:1:1104:24842:17172	1	97	10	5	1	AG	TCTCTCTCTC	NA	1	1	3	57	290	GGGAAAGTCATGGTGATACGAGTTGGAGATAACTTGATGGACAGTGGATgggggAATTCTAATTTGGTTTAGATCTTGTTtctctctctcAAGAAGAATACTAGAAAAGGGACTCAGAGAAGAGGTGTCCCTTCCTCTAATGCCATTTTGTTGCGATATCCTAGTCGAGGCCTAAGTCAGATGCCATGTGGACCTTCTGTGAGCTGATGTGGCAAGTAGATATTGCAGATGTGACAGATGGGTGAAGTAGATATGCTGGATAAATTGGGTGATGATATGGAAGTAGAGTG	GGGAAAGTCATGGTGATACGAGT	CACTCTACTTCCATATCATCACCCA	57	175	17	23	306	25	60.119	59.695	4.18	4.51	8.42412	F	308	GGTATTTCTTTCTGAGGGGAAAGTCATGGTGATACGAGTTGGAGATAACTTGATGGACAGTGGATgggggAATTCTAATTTGGTTTAGATCTTGTTtctctctctcAAGAAGAATACTAGAAAAGGGACTCAGAGAAGAGGTGTCCCTTCCTCTAATGCCATTTTGTTGCGATATCCTAGTCGAGGCCTAAGTCAGATGCCATGTGGACCTTCTGTGAGCTGATGTGGCAAGTAGATATTGCAGATGTGACAGATGGGTGAAGTAGATATGCTGGATAAATTGGGTGATGATATGGAAGTAGAGTGGA
	M00842:287:000000000-BGGT4:1:1104:25147:19781	1	309	10	5	1	AG	AGAGAGAGAG	NA	1	1	4	34	129	TTCCGGCAAAGACCCTTCAATAGTTAAGTCAGTGTAAATGGCAACAACAGTAGGGAAATGAGTAAagagagagagTTCagagagTCTCCTGATGAGTAAAGTTCTATAAAGAGTGGAGTGAGCTTGAGT	TTCCGGCAAAGACCCTTCAA	ACTCAAGCTCACTCCACTCT	45	34	244	20	372	20	59.816	57.992	2.69	3.24	2.19221	B	377	CAAAAGTTGTTGCTCAATAGATATAATTCCCGAGAACACAGATTCACTTATCCAGAGGCCTCTTCCTCTTTCCATGAGATTCaaaaaGAATGCTATTGAGTTGACAAAGTTTGAAAGAAGTTGTTGCAGGGCTCTCACTGATCGGTACACCGGATGGCATGTGAGCAACTCAGCTGATGATATGGCTGTCATCTCCTCCGGATGCTGCGCAGATCTACAACGAAGTTTTCTAGCTAGATATGGTTCCGGCAAAGACCCTTCAATAGTTAAGTCAGTGTAAATGGCAACAACAGTAGGGAAATGAGTAAagagagagagTTCagagagTCTCCTGATGAGTAAAGTTCTATAAAGAGTGGAGTGAGCTTGAGTAGTAT
	M00842:287:000000000-BGGT4:1:1104:26481:13325	1	94	22	11	1	AG	AGAGAGAGAGAGAGAGAGAGAG	NA	1	1	2	36	291	TGGACTTTGACGTGGCTCTAGGATAAGAGGAGGctcctcctcCAGTTGCCCACACCagagagagagagagagagagagAAATTgagagaAATTAGATTGGGAGAGTCTCACCAGATTTTCTCGGATCTTCACCAGAGAAGAGCTGTCAAACTACAACACCGGTGCCATCTAAGCCGAGGTGAGACTTCCATGACCCTCTCCTCCCTTTTAATGTGTTAAATTGCTAAGGATTTGTACCGATTACTGACAGGATCAGCTGTTGTCATGCGATTGGTGGTCACAGTAGGTTGC	TGGACTTTGACGTGGCTCTA	GCAACCTACTGTGACCACCA	36	193	38	20	328	20	58.666	59.892	2.43	4.17	1.44199	B	377	CTCCTATTTTCCGGGAGGATGGAAAACTAGGgtgtgtTGGACTTTGACGTGGCTCTAGGATAAGAGGAGGctcctcctcCAGTTGCCCACACCagagagagagagagagagagagAAATTgagagaAATTAGATTGGGAGAGTCTCACCAGATTTTCTCGGATCTTCACCAGAGAAGAGCTGTCAAACTACAACACCGGTGCCATCTAAGCCGAGGTGAGACTTCCATGACCCTCTCCTCCCTTTTAATGTGTTAAATTGCTAAGGATTTGTACCGATTACTGACAGGATCAGCTGTTGTCATGCGATTGGTGGTCACAGTAGGTTGCCAACGACTCGCCGAGCTAAGGAGAGGTCTTCTCTTCCTCCCTTCCATCT
	M00842:287:000000000-BGGT4:1:1104:27827:21076	1	147	18	9	1	AG	GAGAGAGAGAGAGAGAGA	NA	1	1	4	105	291	GTCACTGCCTCATGGTCCATTGTTAGCCTTTCCCTTGCCACAATCGTAGAGAAGCTGTGGCTGAGCCCATAACGAACTCAGTCTTCACCCAAGAGGGAGTATGAgggggggggggggAGGGGAGGgagagagagagagagagaACCACACctctctTTTCTCCCTTCCCTCTTCCTCCCTTCTCTTCTTCCTCCACTCCAATCTCTTAGTTTCATAAGGTTTCCTCCCCACTATAGCGATCTTGGCCTGTGCTCCCCTATTTGCACTGCTGGCAGCTGTAAGAAATGGCTG	GTCACTGCCTCATGGTCCAT	CAGCCATTTCTTACAGCTGCC	105	127	22	20	312	21	59.746	59.866	3.41	4.85	1.38797	F	389	ACCAACAGCAACCTCTTTATGGTCACTGCCTCATGGTCCATTGTTAGCCTTTCCCTTGCCACAATCGTAGAGAAGCTGTGGCTGAGCCCATAACGAACTCAGTCTTCACCCAAGAGGGAGTATGAgggggggggggggAGGGGAGGgagagagagagagagagaACCACACctctctTTTCTCCCTTCCCTCTTCCTCCCTTCTCTTCTTCCTCCACTCCAATCTCTTAGTTTCATAAGGTTTCCTCCCCACTATAGCGATCTTGGCCTGTGCTCCCCTATTTGCACTGCTGGCAGCTGTAAGAAATGGCTGGTCATCACCAAATCTCATAGATCAACAAACCACAGGGGTTTTcccccTACctctctTCCTCtttttGGGCATCGTCG
	M00842:287:000000000-BGGT4:1:1104:4202:9264	1	51	10	5	1	AG	AGAGAGAGAG	NA	1	1	3	15	97	CAGGGTTGCACAGAGTCAGATGGAGCAGAGTGTGCagagagagagGCATCACTCTAAGGAGACCGTGTCAGGTGGAGCACCAATTGTAGTGAGAGCC	CAGGGTTGCACAGAGTCAGA	GGCTCTCACTACAATTGGTGC	15	31	16	20	112	21	59.606	59.26	3.27	5.01	2.13422	A	358	ACCGCGCACCAGTACCAGGGTTGCACAGAGTCAGATGGAGCAGAGTGTGCagagagagagGCATCACTCTAAGGAGACCGTGTCAGGTGGAGCACCAATTGTAGTGAGAGCCCATACAGAAATACTACTGTTATGTCTAAAATTATACTGCAAGTACATGGTGTGCAAAATAATACATTCGACGAGTACGGATTGATTCCATGAGAAAATAGTTATTTAAATTGTATTCAAAACCTCGCTCAAAGCTTTAAAAGAAAATGGGAGGTTGTATTCTTAAATTAAATACTTGCAAAATAAATAGCACTTAGATTAATAAATCTCCTTTCAATTCTTTTCTTATGTTACCCAAGCATGGATT
	M00842:287:000000000-BGGT4:1:1104:5731:21062	1	45	24	6	1	ACAT	TATGTATGTATGTATGTATGTATG	NA	1	1	2	18	141	AGacacacGGTAATCATACTTCCTTTTCAACACAAATTATTAtatgtatgtatgtatgtatgtatgTATATTAGAAAAGGTGAAGTTTGGATGGCAAGGAATGATACATGGACGCTCCTCCCCACTTCCTATGGACGGACG	AGACACACGGTAATCATACTTCCT	CGTCCGTCCATAGGAAGTGG	18	55	3	24	143	20	59.29	59.898	3.36	4	4.81286	F	401	TGAGacacacGGTAATCATACTTCCTTTTCAACACAAATTATTAtatgtatgtatgtatgtatgtatgTATATTAGAAAAGGTGAAGTTTGGATGGCAAGGAATGATACATGGACGCTCCTCCCCACTTCCTATGGACGGACGTAAGCCAAATTTCTGGTAGATGGTTTGcccccccACTAATGCAAATACTTTAGAATCCAGTATTAGACCAGGGTCCGGTCCTCACGGCGCATGATGGTCCCACCACCTCTTGTCATGAATTATTGCAAACAAGAAATGACACAAGTTTAGGTGAAAATTGATGCCGCGTAGAAGCATAGATATAGATGtgttgttgtTAtttttttAAATTTCTTTTCtttttttttATTTTCTTCAAAACTTAGTGTGAAAATGC…
	M00842:287:000000000-BGGT4:1:1104:7842:24220	1	216	48	24	1	AT	ATATATATATATATATATATATATATATATATATATATATATATATAT	NA	1	1	4	72	249	AATGCTTCTAAACATGTCGCAAAAGTATCCACtatataAGtatataaaaaaaTAATTCTCTAATAttttttaaaaaTATCAATAAATATAAATAatatatatatatatatatatatatatatatatatatatatatatatatCATCAGTGTAATTTTAATTCAAGTTGATAAAatttatttatttatttTTGGGTCGAGAAGACTTTGGTGACTGGtttttGAtttttATTCGGTGAACGTCCAGTCTC	AATGCTTCTAAACATGTCGCAA	GAGACTGGACGTTCACCGAA	72	87	122	22	370	20	57.235	59.687	4.85	4.3	5.07772	F	424	CATTCTTTCAGTGCAGACATCATGCTATGATACAAACaaaaaTGGTTAAGAATTATGATGTACTATAAAACATAATGATATAAGCAACACTTATAATATTAGCGTTGGTAAGTAACATTCTAATGCTTCTAAACATGTCGCAAAAGTATCCACtatataAGtatataaaaaaaTAATTCTCTAATAttttttaaaaaTATCAATAAATATAAATAatatatatatatatatatatatatatatatatatatatatatatatatCATCAGTGTAATTTTAATTCAAGTTGATAAAatttatttatttatttTTGGGTCGAGAAGACTTTGGTGACTGGtttttGAtttttATTCGGTGAACGTCCAGTCTCCATCATTCCTAATATTATTGGTGGGACCA…
	M00842:287:000000000-BGGT4:1:1104:8772:17512	1	212	10	5	1	AT	TATATATATA	NA	1	1	2	9	204	ACTACACGTTGATGTATGCTCTATATGAGATAAAGATGTGGAGATGATGTTATAGTGATTATATTCAAAGAGTAGAACAATGCTCCTACAAGGCTCACTAGATGTGTCTAAAGAATGAAATGATGCTCCtatataTCCCACCTTTGGGTGAGGGAGTATACtatatatataCAAAGGACCACCGATGGTAGTTCAAATAGTGGT	ACTACACGTTGATGTATGCTCT	ACCACTATTTGAACTACCATCGGT	139	9	51	22	254	24	57.279	59.776	4.09	4.69	8.94502	B	266	tatataAATTATGTGAGAATAGTTATTAGGTACTCACTAATCCGACTACAACTACACGTTGATGTATGCTCTATATGAGATAAAGATGTGGAGATGATGTTATAGTGATTATATTCAAAGAGTAGAACAATGCTCCTACAAGGCTCACTAGATGTGTCTAAAGAATGAAATGATGCTCCtatataTCCCACCTTTGGGTGAGGGAGTATACtatatatataCAAAGGACCACCGATGGTAGTTCAAATAGTGGTTCTATTGAGACG
	M00842:287:000000000-BGGT4:1:1104:9166:12809	1	68	10	5	1	AT	TATATATATA	NA	1	1	2	38	170	CCCACAGAAGGTCGTCAAAGgaagaagaaGATAATCCATAAACCCTTTGCCCTTCATTtatatatataATCAGCTCCAACAATCGAGATCAGCATTGGTTCAAATGCATAGATTGCAGATCTCTTCACATGTCGAAAATTAGAGACAAGAAAGCTGGTAGCCATTCGACA	CCCACAGAAGGTCGTCAAAG	TGTCGAATGGCTACCAGCTT	38	82	10	20	179	20	58.487	59.387	2.77	3.74	2.12619	B	188	GAAATGCTCCCCACAGAAGGTCGTCAAAGgaagaagaaGATAATCCATAAACCCTTTGCCCTTCATTtatatatataATCAGCTCCAACAATCGAGATCAGCATTGGTTCAAATGCATAGATTGCAGATCTCTTCACATGTCGAAAATTAGAGACAAGAAAGCTGGTAGCCATTCGACATCAATGGCC
	M00842:287:000000000-BGGT4:1:1105:11039:18747	1	100	20	10	1	AG	AGAGAGAGAGAGAGAGAGAG	NA	1	1	7	74	255	GCTCCATCATGTTACAGTATGATTCAATAACATTCAGTTCAAACCCTTTATGGATAAAACATaaaaaTATGATAGTTGAGCAGAAAATTATCAGTCAGCagagagagagagagagagagACTaaaaaTGCTAACTCAGGTGAACaaaaaaaTTGTGATAATCATATGAGCTCAAACATAATCAGATGAGACCTTTTATTATGCTACACAGCTTGATTTGCTGTTCTCACTATAACCTTGTTTGCATCAAGCTACC	GCTCCATCATGTTACAGTATGATTC	GGTAGCTTGATGCAAACAAGG	74	115	1	25	255	21	57.873	57.778	2.52	3.61	10.3487	F	307	GCTCCATCATGTTACAGTATGATTCAATAACATTCAGTTCAAACCCTTTATGGATAAAACATaaaaaTATGATAGTTGAGCAGAAAATTATCAGTCAGCagagagagagagagagagagACTaaaaaTGCTAACTCAGGTGAACaaaaaaaTTGTGATAATCATATGAGCTCAAACATAATCAGATGAGACCTTTTATTATGCTACACAGCTTGATTTGCTGTTCTCACTATAACCTTGTTTGCATCAAGCTACCTAAAGATCATCTATAAATGACATGTTAACTTAATTCAGCATCTGTACTCATA
	M00842:287:000000000-BGGT4:1:1105:11274:10388	1	85	25	9	1.5	AG	AGAGAGGGAGAGAGAGAGAGAGAGA	NA	1	1	2	2	93	GCTTGCGGGATTAGCTTGGGGACTGTGAATagagagagAATAGGAAagagagGgagagagagagagagagaCAAAAGATCTGAGGCCCGGGAA	GCTTGCGGGATTAGCTTGGG	TTCCCGGGCCTCAGATCTTT	26	2	39	20	131	20	61.728	60.914	4.12	2.52	2.64291	B	216	AGAAGACCCTAGGATGGGAGGAGGCCGTGGGCtttttGGCTTGCGGGATTAGCTTGGGGACTGTGAATagagagagAATAGGAAagagagGgagagagagagagagagaCAAAAGATCTGAGGCCCGGGAAGAAACAgggggAGAAGAgggggAGAGGAGACGTCGGGAAGAAATAGAGGAAGGGTAAGAGGGAGTGTTTGGGAGAAAATAGGGAA
	M00842:287:000000000-BGGT4:1:1105:11988:26310	1	166	12	6	1	AT	ATATATATATAT	NA	1	1	6	18	211	CGGAAGAGCCACAatatatAACTCTATACATATTAGATAACAGACTAACAATTACATCACAATAGTATATGACCCcacacaTATCAAATAATAGATTGATAATATCATTACAAAAGACATCATCAGGATATAATATACTAGCTGaataataatATTAGACAatatatatatatGTACTTATCAGCATCTAATGACATGACAGCTCTTCCGA	CGGAAGAGCCACAATATATAACTCT	TCGGAAGAGCTGTCATGTCA	136	18	5	25	215	20	58.308	58.743	3.24	3.58	7.9493	F	218	AGATCGGAAGAGCCACAatatatAACTCTATACATATTAGATAACAGACTAACAATTACATCACAATAGTATATGACCCcacacaTATCAAATAATAGATTGATAATATCATTACAAAAGACATCATCAGGATATAATATACTAGCTGaataataatATTAGACAatatatatatatGTACTTATCAGCATCTAATGACATGACAGCTCTTCCGATCT
	M00842:287:000000000-BGGT4:1:1105:12123:9956	1	84	14	7	1	AT	TATATATATATATA	NA	1	1	8	15	130	CAGTGGAAGTAACGGCCGTTATTTTCCAACCTCAGCTTCTCATTAAAtttttCTCTAATAAAATGTTACGTTAATTTAATtatatatatatataATAGTTTaaaaaTATTCCATTCTCGTTCCATCCAtt	CAGTGGAAGTAACGGCCGTT	AATGGATGGAACGAGAATGGA	60	15	4	20	133	21	60.602	57.068	4.44	3.41	4.53375	F	236	TTGCAGTGGAAGTAACGGCCGTTATTTTCCAACCTCAGCTTCTCATTAAAtttttCTCTAATAAAATGTTACGTTAATTTAATtatatatatatataATAGTTTaaaaaTATTCCATTCTCGTTCCATCCAttttttttCTCTCaaaaaTATCCTTTCACCTCTTTTGCGGTACCAACATAAAATCTATTTAAATAATTTTAtttttttaaaaaaaTaaaaaaGCTCTTCCGATCT
	M00842:287:000000000-BGGT4:1:1105:12809:3809	1	147	25	5	1	AAAAT	AAAATAAAATAAAATAAAATAAAAT	NA	1	1	2	14	196	TTCCACATATTTAtcctcctccCCCCTAACTAATTCTGGCTTCTTTAACCAATTCTGACATGGgagagaagaagaagaCAAGGGCCACAATTCTCACATGTGAAAATTGGCCCTTGCATCAAGATGAAACCACCTAaaaataaaataaaataaaataaaatAAAAGACACCCCTTCCCTCATACACCCATCTGTGC	TTCCACATATTTATCCTCCTCCC	GCACAGATGGGTGTATGAGGG	113	14	11	23	206	21	57.157	60.476	4.3	4.3	7.31877	F	206	CCTCATGAAATTCCACATATTTAtcctcctccCCCCTAACTAATTCTGGCTTCTTTAACCAATTCTGACATGGgagagaagaagaagaCAAGGGCCACAATTCTCACATGTGAAAATTGGCCCTTGCATCAAGATGAAACCACCTAaaaataaaataaaataaaataaaatAAAAGACACCCCTTCCCTCATACACCCATCTGTGC
	M00842:287:000000000-BGGT4:1:1105:13647:9014	1	315	10	5	1	AG	TCTCTCTCTC	NA	1	1	3	0	92	TGTTAATACCTTTCTCCATGATTGGAATATGACAACGACTGCAGCTGTGACCCACTCGTTGTTtctctctctcCATCGCCATCTCCACCCAG	TGTTAATACCTTTCTCCATGATTGG	CTGGGTGGAGATGGCGATG	38	0	252	25	343	19	57.12	60.228	3.16	3.84	9.10792	A	357	CTTTGGTAGACCAATTAAACTCCTCAAATAGCCTCCCCACTACCAAGGTTGTTTGAACTCTTGACTTTGGTAGACCGATTAAACTCCTTAGGCAACCGCACCAACCCTCAAAATTACTGCACCATGGAAGGATCTTCAGGAGGCatatatTCTCGCCTTCCAATAGGGTCCATAGTAAAAGAAGCTTCGGTAGAAGGAGCCTCGACAAGGCTCTGACCTGAGACACATATGGCGCGAACTCTaaaaaaaTATGTTAATACCTTTCTCCATGATTGGAATATGACAACGACTGCAGCTGTGACCCACTCGTTGTTtctctctctcCATCGCCATCTCCACCCAGCGCTCTTCCGATCT
	M00842:287:000000000-BGGT4:1:1105:15439:18043	1	151	10	5	1	AG	GAGAGAGAGA	NA	1	1	3	13	192	AGTTCCTGAGAAGACTATGGTGATTAAGGTAGCTCACCTCCTTTTCTGCCTTCATCTCCTCAAGGATGTTTGGAATCCTCTAGGGtttttCTAGATTCCCCTTCCTTTTCTTCATGCTTTTAGTCTTTAGGCGAGATGAGGGCCTATGgagagagagaGTTTTCCTTGGTCTGGGTTGAGGGAGATACCAGT	AGTTCCTGAGAAGACTATGGTGA	ACTGGTATCTCCCTCAACCCA	125	13	3	23	194	21	58.322	59.92	4.02	4.51	5.75875	F	224	CAAGTTCCTGAGAAGACTATGGTGATTAAGGTAGCTCACCTCCTTTTCTGCCTTCATCTCCTCAAGGATGTTTGGAATCCTCTAGGGtttttCTAGATTCCCCTTCCTTTTCTTCATGCTTTTAGTCTTTAGGCGAGATGAGGGCCTATGgagagagagaGTTTTCCTTGGTCTGGGTTGAGGGAGATACCAGTATTTGGTCCATGCCTGAACATATCAGGTTG
	M00842:287:000000000-BGGT4:1:1105:16054:8552	1	126	14	7	1	AG	AGAGAGAGAGAGAG	NA	1	1	4	23	137	GGAGAGGTGTGGATGTTGATCAATTCTCAtttttCTATCAATGTAGATGGCCAagagagagATAAGTTGGAGAGCAAGCAagagagagagagagATTGATTTTCATAGAGGACATCATGgagagagaGGACAAGCCT	GGAGAGGTGTGGATGTTGATCA	AGGCTTGTCCTCTCTCTCCA	58	23	46	22	182	20	59.763	59.589	2.92	3.86	2.64859	F	414	GAAagagagagAAGGAGATGGGAGGAGATagagagAAGTACCCAAGGAGAGGTGTGGATGTTGATCAATTCTCAtttttCTATCAATGTAGATGGCCAagagagagATAAGTTGGAGAGCAAGCAagagagagagagagATTGATTTTCATAGAGGACATCATGgagagagaGGACAAGCCTCGAGGGAGAAAGATTATGAAGAGAAGCTTTgagagaTCATTcacacaCTTCATAtttttttCTaaaaaGGATTGAACTGAAAGGCCAAATCATGTCAATTACTAACCTTAGTTACAAGATAGGAACaaaaaTCATACGTTATTATCTCTTGGGTATGAATCTTCACTTTAGTCTCTAATAATGTAGCTGACTAGATGGCATCTtatataGCTAATCA…
	M00842:287:000000000-BGGT4:1:1105:16104:24120	1	42	10	5	1	AT	TATATATATA	NA	1	1	3	7	131	TCGATGTCAATCTTAACCGTTGGAACTGATtatatatataGGTGAAAGGCAAACCGCCAGAAGGCTATTTTCTTCTTTCAATGCATACTCACAAAGATCGTGTTCTCTAGAGCCATCGTCCTTTCTTCTCC	TCGATGTCAATCTTAACCGTTGG	GGAGAAGAAAGGACGATGGCT	7	70	12	23	142	21	59.07	59.792	3.77	4.75	5.13852	A	168	GTTCACTTGAATCGATGTCAATCTTAACCGTTGGAACTGATtatatatataGGTGAAAGGCAAACCGCCAGAAGGCTATTTTCTTCTTTCAATGCATACTCACAAAGATCGTGTTCTCTAGAGCCATCGTCCTTTCTTCTCCCCTAGATGTGTCCTTTAGTTTCTTGT
	M00842:287:000000000-BGGT4:1:1105:16333:8889	1	384	30	8	1.5	AT	TATATATATATATATATTTATATATATATA	NA	1	1	8	11	114	aaaTTAACTACATTTGCTAGGCTCAAAATTGATTGCtatatatatatatataTTtatatatatataAGAATTACGATAGATGTAAGTTTGACCAAATGTTGAATCGAGAAGTGT	AAATTAACTACATTTGCTAGGCTCA	ACACTTCTCGATTCAACATTTGGT	11	24	348	25	461	24	57.062	59.178	4.26	3.67	12.7599	F	475	ATACAACTTTTAGTCTCCTTGATAGACTTAGCTTATGTTGACATACATGTTTGCTAGCCTTTCTTTTATGAACAGAAAATTATTTCTAAGGACTTGACTATTCATCatatatTTCTTTTATAtttttAAATTATTTTACTAAACCAAATTAAGACAATGTTATATGCATATGTACatatatatCTATAATTGGTAATGTGTTAATCTAACCCTATTTGAGTTAGATCCAAATTTCATATGAAAATCTTGTTAGATCAATTTCATTCATGATATTTCAACTAGATTTGTGATTACCTAGTGAGATTTATTCTTGGATTCATATTTTATTTGAGTCTAGGTCTCaaaaaaaaTTAACTACATTTGCTAGGCTCAAAATTGATTGCtatatatatatatata…
	M00842:287:000000000-BGGT4:1:1105:16353:2005	1	325	14	7	1	AG	CTCTCTCTCTCTCT	NA	1	1	3	45	236	GCCACTAAGGGCTGAGCTAGaaaaaGAGCATGCTAGCCAACCTGAGGGCCGGTTGGCTCTTTCTCGGCCCCAGCGTCACCCCGGCAATAGTGGAGGCCACCGAAGGTAAGCGTTGGTCTACGGCTGAAATGAGGGAGGAAGGAGATAGTGGGAGGGGctctctctctctctTCTCTGTCTCGTGCGTCAAAATTTGTGCACGAGATgggggAGgagagaTGAAGCAGTGGGCCTTC	GCCACTAAGGGCTGAGCTAG	GAAGGCCCACTGCTTCATCT	137	45	168	20	403	20	59.894	60.035	3.42	2.9	0.140449	F	430	ATTCTTCCTTTCTTTCCTTTATTTTGCTTTCCTAGTGAGGAGGTCTAGGACATAGGTATCTTCGAAATTTCGTCCCCTTTTCCTTGTGACCCTAGCGAGGACCGGGGCCAGGCTCTTGATGGCCACGGTGGCTTCTAGGGAGCCCGAAGGCTGCGAGAAACTTCTTGGCCACTAAGGGCTGAGCTAGaaaaaGAGCATGCTAGCCAACCTGAGGGCCGGTTGGCTCTTTCTCGGCCCCAGCGTCACCCCGGCAATAGTGGAGGCCACCGAAGGTAAGCGTTGGTCTACGGCTGAAATGAGGGAGGAAGGAGATAGTGGGAGGGGctctctctctctctTCTCTGTCTCGTGCGTCAAAATTTGTGCACGAGATgggggAGgagagaTGAAGCAGTGGGC…
	M00842:287:000000000-BGGT4:1:1105:16386:14906	1	88	30	9	1.5	AT	ATATATATATATATATATACACACATATAT	NA	1	1	12	10	207	TCGACAGAAACGATCGACATAATGGTCGACatatatatatatatatatacacacatatatACATAAAttttttttAGTTATAATTAGATATTTGTTGGGGTCAACTAATTTAATCTTTCATCAGTTGTACAAAGAAAATCCTAGTACTTGGGGATCTCTTCTCTGCAAAATGCCTTTTGTGGATTaaaaaCGTGAGGGCTATGCAAT	TCGACAGAAACGATCGACAT	ATTGCATAGCCCTCACGTTT	10	127	58	20	264	20	57.086	57.871	3.06	3.6	5.04255	F	331	CAGAAAAGGTCGACATAATGATCGACATATGGGTCAACATATTGGTCGAAATAAAGATCGACAGAAACGATCGACATAATGGTCGACatatatatatatatatatacacacatatatACATAAAttttttttAGTTATAATTAGATATTTGTTGGGGTCAACTAATTTAATCTTTCATCAGTTGTACAAAGAAAATCCTAGTACTTGGGGATCTCTTCTCTGCAAAATGCCTTTTGTGGATTaaaaaCGTGAGGGCTATGCAATTTTGAATGCaaaaaCtttttCAAAgggggATAATATCTCGTGGGGATACAAGTAAACCTTTTGCAAT
	M00842:287:000000000-BGGT4:1:1105:17257:17451	1	192	18	6	1	AGG	CTCCTCCTCCTCCTCCTC	NA	1	1	4	23	136	AAATCCCTCCCATCGCCCtttttCTCCTGATCTATCCCCAAATctcctcctcctcctcctcTTAATCTCCTCGtcctcctccTCTGCTGACGCTCATCGCCGACTTTTGGGAtctctcCCTGGTCCGTCCCTAATC	AAATCCCTCCCATCGCCCTT	GATTAGGGACGGACCAGGGA	23	55	149	20	284	20	61.289	60.398	3.95	4.2	1.68734	F	285	ACGACGAAttttttAATTCATCGTAATATACCTTAATTACGACGAAATGTTCAATTCATCGTAATAAATTTAtttttttaaaaaaaTTTAAATTAAGaaaaatttttATTACGATGAATTGTGtttttGTCACAATAGATTGGCCCTAAAATCCCTCCCATCGCCCtttttCTCCTGATCTATCCCCAAATctcctcctcctcctcctcTTAATCTCCTCGtcctcctccTCTGCTGACGCTCATCGCCGACTTTTGGGAtctctcCCTGGTCCGTCCCTAATCA
	M00842:287:000000000-BGGT4:1:1105:17281:17978	1	112	25	5	1	AAAAT	ATAAAATAAAATAAAATAAAATAAA	NA	1	1	2	48	187	ACCTGGCTTATGCTTTGGGATTTATGCATAAGGTGGaaaaaaaTaaaaaaaaTATGCACCCCAATTCCCATACCTACACATACATCTAGataaaataaaataaaataaaataaaATACATAAATCATATAGATTTGTATCAGAAATAGTATTGGGTGATGTTCCCATCAATGGTATGATCTGTATCA	ACCTGGCTTATGCTTTGGGA	TGATACAGATCATACCATTGATGGG	69	48	23	20	209	25	59.296	58.286	4.37	4	7.41835	F	225	CTAAGAAATTCCTAACAAACTAACCTGGCTTATGCTTTGGGATTTATGCATAAGGTGGaaaaaaaTaaaaaaaaTATGCACCCCAATTCCCATACCTACACATACATCTAGataaaataaaataaaataaaataaaATACATAAATCATATAGATTTGTATCAGAAATAGTATTGGGTGATGTTCCCATCAATGGTATGATCTGTATCAGAAATGGTGCTAGGTG
	M00842:287:000000000-BGGT4:1:1105:17466:15321	1	100	18	9	1	AG	CTCTCTCTCTCTCTCTCT	NA	1	1	2	49	162	CAGCATGACAATCTCCGGGTGGGTGTTCATGATCTCTGTTGGATTCAATGCTGCCGCCAGGTCAGCACCctctctctctctctctctAATCAACAAAGAAATGCTATAGGGGACCAAGAAGGTGATTTAGGACCTAATTACTCACATTTGTCACCTCCTTCT	CAGCATGACAATCTCCGGGT	AGAAGGAGGTGACAAATGTGAGT	49	52	31	20	192	23	60.108	59.607	5.28	3.41	3.50012	A	314	CGTTTCAAACTGTTTGtttttttGTGGATGCAGCATGACAATCTCCGGGTGGGTGTTCATGATCTCTGTTGGATTCAATGCTGCCGCCAGGTCAGCACCctctctctctctctctctAATCAACAAAGAAATGCTATAGGGGACCAAGAAGGTGATTTAGGACCTAATTACTCACATTTGTCACCTCCTTCTTTTGTCTACTAGGTATTTATTGtttttAAGCAGTATAATTAATGTGGCTGCTGTGCCCCTTGGAGCAACAAGACAAGAAGACCACTAGCTTGCAACTTGATGCTTAGTCACGGCAACTACTG
	M00842:287:000000000-BGGT4:1:1105:18916:23055	1	130	14	7	1	AG	GAGAGAGAGAGAGA	NA	1	1	4	53	162	CCGAGGTGGTGTTGGAGATGAAAGATTAAGAGAAGAGGAGAAGAGTCACCCTATCCCAAATCTTAGGAGAACTAGgagagagagagagaAGAGAAAGGGGAGAAAGAGGGAGAAGGAGAGGGAGGGGAagagagAAACATATTGAGGGATTGGCATTGGTGT	CCGAGGTGGTGTTGGAGATG	ACACCAATGCCAATCCCTCA	55	53	55	20	216	20	60.392	59.591	2.9	3.86	0.800752	B	259	CTCATACCGATCAGTGACCTGTTACTTACAATACTAGTATGTACCAAACTTGAGCCGAGGTGGTGTTGGAGATGAAAGATTAAGAGAAGAGGAGAAGAGTCACCCTATCCCAAATCTTAGGAGAACTAGgagagagagagagaAGAGAAAGGGGAGAAAGAGGGAGAAGGAGAGGGAGGGGAagagagAAACATATTGAGGGATTGGCATTGGTGTTGATTGAGGACTTGAGAACCATGCTAGATAGAGGGAGAGGGTG
	M00842:287:000000000-BGGT4:1:1105:19361:7165	1	36	15	5	1	ACC	TGGTGGTGGTGGTGG	NA	1	1	8	9	145	AGGCTTGAGCTGGAGTCAGACTGACCAAAtggtggtggtggtggGGGGAGGTGGAGCAAACAGGGGAAGAGGGAGGAAGAGGGTGGGAGAAGAATCAGAGGAGAAGACACTAGGAAGAAGGTAACAGGGAAGAAGTCGAGAGGGA	AGGCTTGAGCTGGAGTCAGA	TCCCTCTCGACTTCTTCCCT	9	81	7	20	151	20	60.544	59.295	3.27	4.2	1.24914	A	236	ATAACTAGGCTTGAGCTGGAGTCAGACTGACCAAAtggtggtggtggtggGGGGAGGTGGAGCAAACAGGGGAAGAGGGAGGAAGAGGGTGGGAGAAGAATCAGAGGAGAAGACACTAGGAAGAAGGTAACAGGGAAGAAGTCGAGAGGGAGGGGTTCTGagaagaagaagaGAGCACTAAGAAGAGGAAGGGAGGACTGAGAGGGGAAGAAGGGGAAGAGAAGATTAGCGAAGGG
	M00842:287:000000000-BGGT4:1:1105:19497:2113	1	173	16	8	1	AG	GAGAGAGAGAGAGAGA	NA	1	1	4	34	249	TGCTGATCCGATGCATCACAAACCAAGAAGGAGAGGAAGTGGAGAAGAgggggggagagagagagagagaGGTgggggggAGAggggggTCGAAGGCAACGATTATTGTCATTGAggggggAggggggggTgggggAGAAAGAGTTAgggggAGTggggggggggggggagagagTGAGCTgagagaGGAGGGACTTACCTCATCGGTGGTGACCAACAATGGAGAGGGGCagagagTAGCTCAAAGGA	TGCTGATCCGATGCATCACA	TCCTTTGAGCTACTCTCTGCC	34	158	119	20	367	21	59.821	59.172	3.58	4.85	2.0065	F	475	TTGATGAATGGTTGAGGCTTCAATCCAACAAACATTAATCCAATaaaaaTGATCCAAACCAAGATCTGCCAAAATAGTAAAGCCAACAACTAGTTCCACATGATACGGGTCTGTATCATGCTGATCCGATGCATCACAAACCAAGAAGGAGAGGAAGTGGAGAAGAgggggggagagagagagagagaGGTgggggggAGAggggggTCGAAGGCAACGATTATTGTCATTGAggggggAggggggggTgggggAGAAAGAGTTAgggggAGTggggggggggggggagagagTGAGCTgagagaGGAGGGACTTACCTCATCGGTGGTGACCAACAATGGAGAGGGGCagagagTAGCTCAAAGGAACTAGGGCATGATCAATCTTTAAGAGTTGTTA…
	M00842:287:000000000-BGGT4:1:1105:19780:13088	1	264	17	5	1.5	AT	ATATATTTATATATATA	NA	1	1	7	22	241	ACATGTTTATGAAATGCCAATGTTTTCTGATGCCTCACCTTAAGACTTATTTTGGTATGATATAAAATAtttttCTTATGCTATAGCTTTATATCTCTTGAAAGATGCATGAACATGaaaaaTATACATTTGATCCAATAAGGTAGTGCAGATTTACTTACTGAGTTATTGTTGCACatatatTtatatatatatttttCTTATTAGAGATGAATAGAAGTAGTAATGCTGAAAGATGGTT	ACATGTTTATGAAATGCCAATGTTT	AACCATCTTTCAGCATTACTACTTC	152	22	87	25	327	25	57.017	57.383	2.83	3.01	15.5998	F	336	ATTATGATTTAAGAAATGAATTTATTTCCATGTGTTATGAAGTGCTTATTGACGTATTATTTTATGATTCATCTTTAAGAAATGTTACATGTTTATGAAATGCCAATGTTTTCTGATGCCTCACCTTAAGACTTATTTTGGTATGATATAAAATAtttttCTTATGCTATAGCTTTATATCTCTTGAAAGATGCATGAACATGaaaaaTATACATTTGATCCAATAAGGTAGTGCAGATTTACTTACTGAGTTATTGTTGCACatatatTtatatatatatttttCTTATTAGAGATGAATAGAAGTAGTAATGCTGAAAGATGGTTTAGATTTTG
	M00842:287:000000000-BGGT4:1:1105:20531:17688	1	164	12	6	1	AG	CTCTCTCTCTCT	NA	1	1	4	13	90	GCTTTGAGCCCGtctcttctcttctctCTCAGGATTGCACCGCCActctctctctctGTGGCGCAATTACTGGACAGACGCGAAACGAAA	GCTTTGAGCCCGTCTCTTCT	TTTCGTTTCGCGTCTGTCCA	25	13	119	20	208	20	60.037	60.528	2.85	4.02	0.564891	F	256	gatgatgatTATGGGACGAACGGGCGATGGGGAGGAGAATTTATCGGgagagaAGGGGAGGGAAGGCGCCAGTTGAGCCCACGGGCTGTGGAGGTGCTCCCCATGGTTaaaaaaTGGTGCTTTGAGCCCGtctcttctcttctctCTCAGGATTGCACCGCCActctctctctctGTGGCGCAATTACTGGACAGACGCGAAACGAAAAGGCGAACAGGGGATAGGAAGGGGAGATCCGATTGGGTGAGAACTACA
	M00842:287:000000000-BGGT4:1:1105:20582:9166	1	93	10	5	1	AG	AGAGAGAGAG	NA	1	1	15	20	132	TGTTGAGCAGCATAGAATGAAAGTATGTGTTGAATGTCAAAATAaagaagaagAACaaaaaaTgggggAGACaaaaaagagagagagAATTATAGGCAAGTATATTGAGTAGTATGGAATGGAAGTATGTGA	TGTTGAGCAGCATAGAATGAAAGT	TCACATACTTCCATTCCATACTACT	53	20	16	24	147	25	58.994	57.086	2.66	2.57	12.9202	F	358	AATTATAGCAAAATATGTTGAGCAGCATAGAATGAAAGTATGTGTTGAATGTCAAAATAaagaagaagAACaaaaaaTgggggAGACaaaaaagagagagagAATTATAGGCAAGTATATTGAGTAGTATGGAATGGAAGTATGTGATGAATAACAAAATGAGATAAATGGTATCAttttttttATGAAGCTTTTAGTATCTCATGATATAGTATCACGAAgggggAGCTTGAAAAGTATCATGATaaaaaaTATCTCTGATATCTATTAGCTCTGATATACTCTATTCTATCTTTAGCTCTGATATCTTGATACTTTCAGCATTTCTGGCTGaaaaaCTGAATTACACTCTAATATT
	M00842:287:000000000-BGGT4:1:1105:2058:16871	1	157	16	5	1.5	AG	ATATATAGAGAGAGAG	NA	1	1	2	11	139	TCGGTGAAGCAGGAGAAAGTACAGAGGGAATGGAACTCAACAGTTCTATGTCGAAGCTCGATGGGCTGGGATTGATGGCTTGGAGAAGATAGatatatagagagagagGAGGGATGAGCGGCCTGGTTTGTGAGAAGGT	TCGGTGAAGCAGGAGAAAGT	ACCTTCTCACAAACCAGGCC	72	11	65	20	203	20	58.951	60.179	2.66	5.19	1.22759	B	439	GTAGATCGGAAGAAGTAAGCAGCGCAAGGAAAGCAAGCAGGAGGATGCGTGAAGCCATGTTTGTTCGGTGAAGCAGGAGAAAGTACAGAGGGAATGGAACTCAACAGTTCTATGTCGAAGCTCGATGGGCTGGGATTGATGGCTTGGAGAAGATAGatatatagagagagagGAGGGATGAGCGGCCTGGTTTGTGAGAAGGTTGGACCTTTGaaaaaGTCGGGAAGGTTGGCCGTGATTTGCtttttttttCttttttCGTTtatatataAATAAAATGGTTTCTTCCAACGCTTTGTATTCTTTTATAAAGTACAAATAAAATGGTTTCTTCTACCGTTCTTCCAAGGGCAATAGACTCGGTCCTTCTCATCGTTCCTATACGGATGACGGACTCAG…
	M00842:287:000000000-BGGT4:1:1105:20641:6627	1	96	12	6	1	AG	CTCTCTCTCTCT	NA	1	1	14	9	132	GCTGGAGGTGATTCGAAGGTGGAAAGgagagaTTGGGAGAGGAAAagagagagGgagagaGGAAgggggAGAGGGAGGCCGGTCCCTCTCCctctctctctctTCATGCATGGCTCCCTCTCCCActctctT	GCTGGAGGTGATTCGAAGGT	AAGAGAGTGGGAGAGGGAGC	71	9	5	20	136	20	59.749	60.325	3.5	4.7	0.575716	F	245	GAGGGCTGGAGGTGATTCGAAGGTGGAAAGgagagaTTGGGAGAGGAAAagagagagGgagagaGGAAgggggAGAGGGAGGCCGGTCCCTCTCCctctctctctctTCATGCATGGCTCCCTCTCCCActctctTCTCctctctctctctCCATCTCTTTAGTACGAGCCTGGCATGGAATGATACAGGCCTGTACCAAACCATCCCATCGATTGGTTGGAACGCTCTCAGGTACTGGCACGGC
	M00842:287:000000000-BGGT4:1:1105:20648:3789	1	145	22	11	1	AC	ACACACACACACACACACACAC	NA	1	1	2	23	137	TCCTAATATCCACAAGCAGCGTATTTTGTAATTAAAATCAATTTGacacacacacacacacacacacATAATCAAGCTCaaaaaTATGCATTTTCTATATTTGATTATTATAATTGCATCAACCATATGATCCCTCG	TCCTAATATCCACAAGCAGCGT	CGAGGGATCATATGGTTGATGC	23	48	100	22	236	22	59.566	58.994	5.07	3.91	5.43989	F	338	GTATCAAGGTAGCTACCCAATATAATTTAACTACTAGATGCATGGGTGGGCACGGTATCTAGGTTGGAGTCCTATCCAAGTCTAAGGTTATGAATAAAATCCTAATATCCACAAGCAGCGTATTTTGTAATTAAAATCAATTTGacacacacacacacacacacacATAATCAAGCTCaaaaaTATGCATTTTCTATATTTGATTATTATAATTGCATCAACCATATGATCCCTCGAGATCAATAAGAAAGAAAGTAACATAAAACACCCTTAAAATCATAATTTAAAGATCAATAAAACTTAAAATAATCTTCAGAACCATAATATTGaaaaaaaaa
	M00842:287:000000000-BGGT4:1:1105:22087:5864	1	267	35	9	1.5	AT	GTGTGTGTATATATATATATATATATCCACACACA	NA	1	1	2	1	172	gttgttgtAGCAACGCTCTTGCTATTCTCATTCTTGGATTTTGCTTTGACtttttAAGTATGaaaaaTAGGTTTCAATAATCCCGtatataGTGaaaaaaGCATGTATGTGGgtgtgtGtatatatatatatatataTCcacacacaAACACAGACACATTTGATTGAAGGT	GTTGTTGTAGCAACGCTCTTG	ACCTTCAATCAAATGTGTCTGTGT	91	1	155	21	326	24	58.36	59.111	3.02	3.72	7.52916	F	464	GTTTCCTGTCTTGGTCTGCTccaccaccaATTTCCCACCTTGGTTGCCGGATCCGTTCTAGTCAACTGCCGGTATGGCTCGAGATACCCCGAATCGGACGGTTCGGGATGGTTTCGCTGACCATGTGGCTATGTTTTGCAGCCTATTGGCTACtgttgttgtAGCAACGCTCTTGCTATTCTCATTCTTGGATTTTGCTTTGACtttttAAGTATGaaaaaTAGGTTTCAATAATCCCGtatataGTGaaaaaaGCATGTATGTGGgtgtgtGtatatatatatatatataTCcacacacaAACACAGACACATTTGATTGAAGGTATGCATACTCAAAGCTTTGAGGtctctcCTTCTTAAGCGGCCACCTAAGCACCTAGGCACCCACCTCGGACAT…
	M00842:287:000000000-BGGT4:1:1105:22133:26115	1	70	10	5	1	AG	GAGAGAGAGA	NA	1	1	3	34	190	AAATACCATGCCTTCTTCTGTGAAGTCATCTCCCTATCCCAGATATGCTGCAAACAGgagagagagaTGTTGCACCACTGCCATCATCTGTGCCTCCAATCAGTCACTGCACTAGTGCCGTCTATCTATGACTCCGATCCCCAATCTACCATAGTAGATCCCAATtgtgtgTCCTCATTCACACCATTGT	AAATACCATGCCTTCTTCTGTGA	ACAATGGTGTGAATGAGGACACA	34	100	13	23	202	23	58.078	60.435	3.58	3.72	8.35709	F	210	CTCAAGAGGTTAAAATACCATGCCTTCTTCTGTGAAGTCATCTCCCTATCCCAGATATGCTGCAAACAGgagagagagaTGTTGCACCACTGCCATCATCTGTGCCTCCAATCAGTCACTGCACTAGTGCCGTCTATCTATGACTCCGATCCCCAATCTACCATAGTAGATCCCAATtgtgtgTCCTCATTCACACCATTGTATTTATCC
	M00842:287:000000000-BGGT4:1:1105:22398:7053	1	128	15	5	1	AAG	AAGAAGAAGAAGAAG	NA	1	1	3	91	281	CCACCAGGCCCAGTAACAATGGGGAGACACTTTCCCCTTATTTTGTCCAAGGCaaaaagaagaagaaAGAAGaaaaaGAAAAGAAGGGGaaaaaaaaGAGAAGAAAGAAAAaagaagaagaagaagAATAAAAGAGGaaaaaTGAGAAAGAAAGGaaaaaaGAGAATGAGAGGGGAGAagagagagAAAGAGCCACACTCTACTTtctctctcTATTTtctctctcTACATtctctcTTTAGACTTTCACTTTAAGATGATCCTAAGGTCTAGTGAAGAGA	CCACCAGGCCCAGTAACAAT	TCTCTTCACTAGACCTTAGGATCA	91	131	17	20	297	24	59.96	57.671	2.71	2.92	6.3684	F	299	TAGTCGACAACCATGGCCACCAGGCCCAGTAACAATGGGGAGACACTTTCCCCTTATTTTGTCCAAGGCaaaaagaagaagaaAGAAGaaaaaGAAAAGAAGGGGaaaaaaaaGAGAAGAAAGAAAAaagaagaagaagaagAATAAAAGAGGaaaaaTGAGAAAGAAAGGaaaaaaGAGAATGAGAGGGGAGAagagagagAAAGAGCCACACTCTACTTtctctctcTATTTtctctctcTACATtctctcTTTAGACTTTCACTTTAAGATGATCCTAAGGTCTAGTGAAGAGATC
	M00842:287:000000000-BGGT4:1:1105:23017:3815	1	178	10	5	1	AT	TATATATATA	NA	1	1	4	3	180	gAGAAAGCGTCGAAATCGGGCGAACgggggATTTgggggTGGATGAGGTATTTTATAAGAAACCTATAACGACGAATTAAAATTCGTCGTAACAGGTATCTATTACGACGAATATACTAATTCGTCGTAATAGATCAGAATTTGTtatatatataTTACGGCGAATACATATTTCGTCGT	GAGAAAGCGTCGAAATCGGG	ACGACGAAATATGTATTCGCCG	125	3	33	20	212	22	59.354	59.277	5.14	6.46	3.3685	F	371	CGGTAGATGAAGGAGGATTTGGGGATTTgggggAGAAAGCGTCGAAATCGGGCGAACgggggATTTgggggTGGATGAGGTATTTTATAAGAAACCTATAACGACGAATTAAAATTCGTCGTAACAGGTATCTATTACGACGAATATACTAATTCGTCGTAATAGATCAGAATTTGTtatatatataTTACGGCGAATACATATTTCGTCGTAATAAAATCTATTACGACGAATTTAGATATGTGTCGTAATAGATTTTACAATTTATTAAtttttCACaaaaaTGACTTATTACGACGAACAAatatatTCGTCGTAATAGGTCTGttttttAATTTTATAAAttttttaaaaaaaaTCGGAAGAGCGGT
	M00842:287:000000000-BGGT4:1:1105:23111:17910	1	168	20	10	1	AG	AGAGAGAGAGAGAGAGAGAG	NA	1	1	3	48	208	GCGACTAGTCTGCTAAGCGTAcccccTTTCCCTCTTCTTATCTTCCACCCCTCTTCCTCTTTTCCTTTGAATCCTAAGCATCTTGATTCTGATTCATAAAGAGTGAAAATGAGAGGGATagagagagagagagagagagAAAGTTGCTCTATTGATGAAGGTTTGCTCATGGCTAGAATGGGATCTATCGACCAGTTGACCTTATCCC	GCGACTAGTCTGCTAAGCGT	GGGATAAGGTCAACTGGTCGA	99	48	49	20	256	21	59.901	59.171	5.07	4.2	1.9283	F	467	GCATGGTCATGATGCCTACAGCTACCATGCACTACCAGTGAGGTTGTTGCGACTAGTCTGCTAAGCGTAcccccTTTCCCTCTTCTTATCTTCCACCCCTCTTCCTCTTTTCCTTTGAATCCTAAGCATCTTGATTCTGATTCATAAAGAGTGAAAATGAGAGGGATagagagagagagagagagagAAAGTTGCTCTATTGATGAAGGTTTGCTCATGGCTAGAATGGGATCTATCGACCAGTTGACCTTATCCCCTCATTACCTTTCTCCATTGATAATCTCTAGCCACCTTATGAAGGAGAATGAGAAATCAAGGTTATTGGCTATAGATTAGATGCAGTGATCATCCAAATCCTTGATAGACCCAAGTTGCCCCAAACTAAATCATAATCAAACT…
	M00842:287:000000000-BGGT4:1:1105:23716:14533	1	334	22	11	1	AG	CTCTCTCTCTCTCTCTCTCTCT	NA	1	1	8	14	128	GCACCctctctGCCTATCTTTCTATTCTCCCTCCctctctctctctctctctctctccccccTATTCTCCCTCTCCCTCATCTTCTCTGTTGTATCGGTATGCGCCTGGCACAACATGGCATGGAGAC	GCACCCTCTCTGCCTATCTT	GTCTCCATGCCATGTTGTGC	14	52	300	20	427	20	58.873	59.828	2.4	4.57	1.29925	F	466	AACaaaaaCaaaaaCAAacacacacacacacacacacAAAACaaaaaaaGCACTTCAAGCAAGGAATGACAAACTGCTAGGTTTGAGGCGTACCAAGTGATCTAATGATGGATTGGGGTGATTCCAGCATTCAAAACAAGAAACAGGCATAGAGCCggggggggggggggggggggggggggggggggggggggggggAAGGGaaaaaaGAAAgggggggAGTgggggggggggggggggAGAggggggggAGAGAAGGAAagagagagagagagagagagGTGGGGAGGGAGGGCCTGGCACCctctctGCCTATCTTTCTATTCTCCCTCCctctctctctctctctctctctccccccTATTCTCCCTCTCCCTCATCTTCTCTGTTGTATCGGTA…
	M00842:287:000000000-BGGT4:1:1105:24205:20637	1	300	10	5	1	AG	AGAGAGAGAG	NA	1	1	4	51	175	CAATCGACCAACAGGCAAGCCTGTGGTCAACCTGTAGCTAAGTCCAGGATGGGCTCACTGCTGcacacaTGCACACTGTgagagagaCAGAGGAagagagagagATAGTCTCTTCTCCTCCCTGTCTTGCAGTCTCTAGCCCTCCCCTCATCGTAAGCCGGAATGAATCGGTAGC	CAATCGACCAACAGGCAAGC	GCTACCGATTCATTCCGGCT	74	51	206	20	380	20	60.11	60.25	4.01	5.52	0.359508	B	416	GGCCTACCAAAATTACTGGGCCAAAAGACCCCGTCCCAGCCCATTGGGCCTTTACACTGTTCACTAGGTCACAGAGGCCCATGGTCGGCCTAACTAAGCCCACAACACCCCATGGTCAACAGCACCCACGGTCACTGTGTCTCCGACCAActctctGGTCACTGGGTCACAGACGGCCCTTCACTGTTGCTGGGCTCACAGCCTGCAATCGACCAACAGGCAAGCCTGTGGTCAACCTGTAGCTAAGTCCAGGATGGGCTCACTGCTGcacacaTGCACACTGTgagagagaCAGAGGAagagagagagATAGTCTCTTCTCCTCCCTGTCTTGCAGTCTCTAGCCCTCCCCTCATCGTAAGCCGGAATGAATCGGTAGCAATCCTGTGACTAGATCGC…
	M00842:287:000000000-BGGT4:1:1105:25625:9359	1	175	26	13	1	AG	AGAGAGAGAGAGAGAGAGAGAGAGAG	NA	1	1	4	27	202	TCCCTATTGTTGAGCCCATCTTTATTAGTCACATGTTTTATTTTCTATTACATCTTCCTCTACTACCCTACAGCACCAAtttttCCCTGGTTCCATATCCGTAGCAAGAAAAGAAAGAAACATTCATGCagagagagagagagagagagagagagTTTTgggggggggAgggggAGGATTtgtgtgGGCgtgtgtTTAGTCT	TCCCTATTGTTGAGCCCATCT	AGACTAAACACACGCCCACA	108	27	46	21	247	20	58.508	59.533	2.9	4.17	2.95857	F	358	GCTCCATCTCAATCTCCATTATTTACTTGATCCTCATCTAGCATATCCCTATTGTTGAGCCCATCTTTATTAGTCACATGTTTTATTTTCTATTACATCTTCCTCTACTACCCTACAGCACCAAtttttCCCTGGTTCCATATCCGTAGCAAGAAAAGAAAGAAACATTCATGCagagagagagagagagagagagagagTTTTgggggggggAgggggAGGATTtgtgtgGGCgtgtgtTTAGTCTCACATTAGAAATTTCTTGAGTACTtatataGAATCAAGGAATCTaaaaaaaTATCTTTAGACTAGCCATTTTAGATTGAAGTTCTAGATTGTTATAAATAGTATTAGTGCA
	M00842:287:000000000-BGGT4:1:1105:25904:8082	1	235	15	5	1	AAT	TATTATTATTATTAT	NA	1	1	4	103	285	TGGACTTTATGGACTGGCCTAGTAATAGAATCTTCTAGAGttattattaAAGGTCATATTCCTTAACATACCTATCATACGATTTTAGCtttttACtttttATAGTTATTTTGACTTGACATAATTATTTCaaaaaaGCCAACTTGAtattattattattatTCATTAATCAGCaaaaaTTTTAGACCCTACtttttttttAttttttAAATATTTTAATTCAAGTTGTTCATTTCCTAATCTATACATTTAttttttACAGATATTACCACCCTTCTACGAccc	TGGACTTTATGGACTGGCCT	GGGTCGTAGAAGGGTGGTAA	127	103	88	20	372	20	58.331	58.439	5.19	2.85	3.22933	F	387	AATTTAGATGGCCCATAGCTCGATTGGGTTAAGTATCTGTAGATGGGTCGTtatataGACCTGTGACTTATTATTGTGCCTCTTATTTGGACTTTATGGACTGGCCTAGTAATAGAATCTTCTAGAGttattattaAAGGTCATATTCCTTAACATACCTATCATACGATTTTAGCtttttACtttttATAGTTATTTTGACTTGACATAATTATTTCaaaaaaGCCAACTTGAtattattattattatTCATTAATCAGCaaaaaTTTTAGACCCTACtttttttttAttttttAAATATTTTAATTCAAGTTGTTCATTTCCTAATCTATACATTTAttttttACAGATATTACCACCCTTCTACGAcccccATTGCTTTGTTTT
	M00842:287:000000000-BGGT4:1:1105:26029:17753	1	93	12	6	1	AG	TCTCTCTCTCTC	NA	1	1	10	26	240	GAGAATgagagaAGAGGGAagagagagAAAGAGCTACTCTTTCTCTACTTtctctctctctcTAGACTTTCACTTTAAGATGACCTAGCTTTAGTGAAGAGGCCATCAACCTGATCCATGGACCCAAGTTAACCCAGATATGAGGCTCTAGACCATCTTGGAGCCCAAATCATCTAGACCGCCTACTAGACTAACTAGACCAATTGACTAGATTGACTACCCCGATCTTGCCAAATGAGT	GAGAATGAGAGAAGAGGGAAGAGA	ACTCATTTGGCAAGATCGGG	26	158	43	24	282	20	58.8	58.245	3.1	5.14	6.95566	F	470	AAAGAAGGAAAACAAACaaaaaaTGAGAAAGAAAGGAAGAAAGAGAATgagagaAGAGGGAagagagagAAAGAGCTACTCTTTCTCTACTTtctctctctctcTAGACTTTCACTTTAAGATGACCTAGCTTTAGTGAAGAGGCCATCAACCTGATCCATGGACCCAAGTTAACCCAGATATGAGGCTCTAGACCATCTTGGAGCCCAAATCATCTAGACCGCCTACTAGACTAACTAGACCAATTGACTAGATTGACTACCCCGATCTTGCCAAATGAGTTTCGAAACTCAAATCTATGAATCCTTCTAATTAACCTAGATCTATGGACGAGCTTAATCCAAGACTCTAGCACATACCCTCTAGTTTCTTTCTCTAATTAAGAAATAATGATTTAAA…
	M00842:287:000000000-BGGT4:1:1105:27568:17996	1	117	12	6	1	AG	GAGAGAGAGAGA	NA	1	1	2	58	178	TCTGTAGTAGGCTGGCCCATAGACCATCTTCCCTCTCCCTTTTGATGCACGAtttttCATGTGCAAGGAGAGGGAAGGgagagagagagaAAGTGCCAGTGAGGGTACGAGAGGgagagaGGGAGTTtctctcTTGGCAATCTTTGTTGCCTCTAGGACGGCATTAGAGGCTGGGAAA	TCTGTAGTAGGCTGGCCCAT	TTTCCCAGCCTCTAATGCCG	58	68	39	20	216	20	60.031	60.107	4	5.69	0.138325	F	360	ATTttattattaTTTTCTTCTCTAAGCTTcccccccTCTCTGTAGTAGGCTGGCCCATAGACCATCTTCCCTCTCCCTTTTGATGCACGAtttttCATGTGCAAGGAGAGGGAAGGgagagagagagaAAGTGCCAGTGAGGGTACGAGAGGgagagaGGGAGTTtctctcTTGGCAATCTTTGTTGCCTCTAGGACGGCATTAGAGGCTGGGAAAAGGGCTGACGAAcccccAGCACACCTCAGCTTAGCCCACAGTGGCCAAGCATCTCCCtttttcttcttcttcttTTTTGTCGCAGCTTCCATGCTCTTTGATGGCCACCATGATCGTCGTGAGCTTGGTCCTTGGCCTTCGCCG
	M00842:287:000000000-BGGT4:1:1105:27699:17854	1	140	10	5	1	AG	TCTCTCTCTC	NA	1	1	5	105	267	TGTCCCTCTCCTATTGCCCTTCTTTGATCTGTTATCTTCTGATGCTATTTCTTGAtctctcTTCTCCATTCATTTTCTACTCTAAAATGGCCCAAAGAGCTCCTAGAAGCtttttCCTATGGATAtctctctctcCTCTTATGTACCCTTTGACctctctAGATTCTTTCTTTTGTTTAGGATTCGATCTTTTGAtttttCttttttCCCTCTCCCTGTCCTGATGTAGAGGTGGCAATAATGCTCAACGATGGAAGTGGTTTGGCT	TGTCCCTCTCCTATTGCCCT	AGCCAAACCACTTCCATCGT	105	112	15	20	281	20	59.657	59.89	5.19	3.73	0.453858	F	318	AGCTTCCATCTCCTTGTCCCTCTCCTATTGCCCTTCTTTGATCTGTTATCTTCTGATGCTATTTCTTGAtctctcTTCTCCATTCATTTTCTACTCTAAAATGGCCCAAAGAGCTCCTAGAAGCtttttCCTATGGATAtctctctctcCTCTTATGTACCCTTTGACctctctAGATTCTTTCTTTTGTTTAGGATTCGATCTTTTGAtttttCttttttCCCTCTCCCTGTCCTGATGTAGAGGTGGCAATAATGCTCAACGATGGAAGTGGTTTGGCTACAACCATCAGATCTGTGAAGAACGATCTTAGTTGTG
	M00842:287:000000000-BGGT4:1:1105:28146:11834	1	168	10	5	1	AC	CACACACACA	NA	1	1	5	91	276	ACCATATGATTCCAAGTCTCCTTAAAACTTTGAGAATTCAAGTTTAATTTTGAAAATTGCTTTTGAATCCATGATATAATATGTTTGCGTTTGTGTAGATGCACACGTATTTGTGAAGGTGAAAGTTTAAAATTACCCCAGTCaaaaaTAGGcacacacacaTACATATCTacacacacAACTACATACATACGTACATACACATACATATGCATGCATAACATACAAATGCATGCATGTATTTTAGGATCAAACTCTGAAATTGACCAAGTTGCA	ACCATATGATTCCAAGTCTCCTT	TGCAACTTGGTCAATTTCAGAGT	129	91	16	23	291	23	57.017	59.046	3.36	3.24	9.93695	F	297	CTTCTACAACCTAGTACCATATGATTCCAAGTCTCCTTAAAACTTTGAGAATTCAAGTTTAATTTTGAAAATTGCTTTTGAATCCATGATATAATATGTTTGCGTTTGTGTAGATGCACACGTATTTGTGAAGGTGAAAGTTTAAAATTACCCCAGTCaaaaaTAGGcacacacacaTACATATCTacacacacAACTACATACATACGTACATACACATACATATGCATGCATAACATACAAATGCATGCATGTATTTTAGGATCAAACTCTGAAATTGACCAAGTTGCAAATAGT
	M00842:287:000000000-BGGT4:1:1105:3955:16712	1	174	10	5	1	AG	TCTCTCTCTC	NA	1	1	4	49	165	TGGGACCTGATTCTGGCAACAGTGAGGATTCTCTGGACTCTAATATTTTGGCTACTCCTTACCTTTCTTtctctctctcCCTTACACTCTTCTTGTTGTGACTCTCCACTAATATAGCCATCGGAGGTCCTCACTGGAACCATATCTGACAAAGGGCTTGCTTGC	TGGGACCTGATTCTGGCAAC	GCAAGCAAGCCCTTTGTCAG	49	66	105	20	269	20	59.962	60.319	4.17	3.51	0.357462	A	474	ATCAGTGCTGGATATGTATGGCAAATACAACGGACGTCACtttttAAATCATTCTTTGCCGCCCATATGGATAAGATGGTCGACACCATGAGTGCTTTATAAAATGGGACCTGATTCTGGCAACAGTGAGGATTCTCTGGACTCTAATATTTTGGCTACTCCTTACCTTTCTTtctctctctcCCTTACACTCTTCTTGTTGTGACTCTCCACTAATATAGCCATCGGAGGTCCTCACTGGAACCATATCTGACAAAGGGCTTGCTTGCAGAATTGTAGATTGAGCAATGGAGACGATAAAAGCAGCTTCGCCATCCCATCTTCATATTTTCCACTACCTCTTCTCTACATCCCTATCATTTTCTTTCCACTTCTCTTCGCTGCTTCTTCCCGCAtctc…
	M00842:287:000000000-BGGT4:1:1105:4736:7521	1	342	18	9	1	AG	TCTCTCTCTCTCTCTCTC	NA	1	1	2	42	244	CCAGGAAACACGTACTCCTGTCTTTCAACAAAGCCCATAGTAGAAGAAGCCTCGGAAAGGCTCTGACTTGAGATGCGCATGGCTCAAACTCCAAAGAGATGTGCTGACATCTTTCTCCATAATTAGAACATGACAACGACTGTGACTGTGGCCCGTCTATCGtctctctctctctctctcCATTGCCATCTCCACCTAGTAGACGCAACCCGATGTACAGTATCACTAGTGCCTGACATCAGAA	CCAGGAAACACGTACTCCTGT	TTCTGATGTCAGGCACTAGTGA	141	42	180	21	423	22	59.657	58.835	4	3.41	4.50854	A	472	AGTTGCTATAAGCTTAGACCCAGGTAGCTCACCAAATCTCCCTACTACAAAGGCTGTCCaaaaaCCTGATTTCAACAGACCAAATTAACTTTCCGGGCAACCGTACTGACCctctctGGGAATTCGCTtatataCTTTGAGATAAGTACCTCaaaaaGCATTATACCTTGGAAGAATCTCCAGGAAACACGTACTCCTGTCTTTCAACAAAGCCCATAGTAGAAGAAGCCTCGGAAAGGCTCTGACTTGAGATGCGCATGGCTCAAACTCCAAAGAGATGTGCTGACATCTTTCTCCATAATTAGAACATGACAACGACTGTGACTGTGGCCCGTCTATCGtctctctctctctctctcCATTGCCATCTCCACCTAGTAGACGCAACCCGATGTACAG…
	M00842:287:000000000-BGGT4:1:1105:5048:12890	1	315	12	6	1	AG	GAGAGAGAGAGA	NA	1	1	4	8	120	CCATCCGAGTTGTATAGGCACAGTTGCGGAGGGGAGTGGGGCCCATAGGTCGAGCCTTGCCGACCAGACGTCAAAGCTTGgagagagagagaGGTCGAgggggTGCctctctTGATACCA	CCATCCGAGTTGTATAGGCACA	TGGTATCAAGAGAGGCACCC	58	8	235	22	354	20	59.898	58.796	4.57	4.61	3.30657	F	357	CTGGTCTGTACCagagagGAGAAagagagGTGgagagaTATTTGCACATGGGCGGCTGCTAAATTCTAAAGTCAGGTGCCAGAGATCTCTGTACCACAAGTTTCATTCGCCAGGGGTGATGCAGACGGGCTTGGAGCTGGCGGAGACATCCCGAGGGAGGATGACTGACAAGACACGAGTGTTAGGCGGCAAGATGACCGGTTGCATAGCCAGTGGTCGTCGGCAGCCGGGCAACCATCCGAGTTGTATAGGCACAGTTGCGGAGGGGAGTGGGGCCCATAGGTCGAGCCTTGCCGACCAGACGTCAAAGCTTGgagagagagagaGGTCGAgggggTGCctctctTGATACCATAG
	M00842:287:000000000-BGGT4:1:1105:5117:18113	1	238	14	7	1	AG	CTCTCTCTCTCTCT	NA	1	1	2	6	154	GCAGTCCAAGGTTGCCAAAGGTAAGTGCCAGcccccATGAGCCTGTAGGCATAAGTAAGATATGGAGCAGTGGAGGAAGAAGAGGGAGAGGAGGAAGAGGGTtctctctcTTGctctctctctctctTCTCCTACACCTTGACATCTACAGGGC	GCAGTCCAAGGTTGCCAAAG	GCCCTGTAGATGTCAAGGTGT	93	6	125	20	278	21	59.967	59.721	2.77	4.16	1.31181	F	278	GTCTCTTTCATTTTCTTCTCTTCATCACTACTTAGATACTGTTGCTCAACCTCACTGATTTGATTATTGGAGGATCCTTGCCAAAACTAAACCCAACAAAAGAGGCACCAATGCCACCTCGACGGCAGTCCAAGGTTGCCAAAGGTAAGTGCCAGcccccATGAGCCTGTAGGCATAAGTAAGATATGGAGCAGTGGAGGAAGAAGAGGGAGAGGAGGAAGAGGGTtctctctcTTGctctctctctctctTCTCCTACACCTTGACATCTACAGGGC
	M00842:287:000000000-BGGT4:1:1105:7136:8012	1	180	23	5	2	AG	GAGAGAGAGAAAAAGAGAGAGAG	NA	1	1	4	24	240	GTTCGTCCTGGGCCTCTAAGCCTACAATTGGCCCGTTGGGCCTCTAATGGGTTGGCGGGCTTTCAATGAGCCCGTCAGATCTGTTCTCAGCCCACCTACACAATCCCTTCGGTCTTCTcccccTcccccccGGTTTCACAGTGAGGCCCGTGGTCCACGTGCGGCCATTGGTGgagagagagaAAAagagagagagGAACagagagagACCTcccccTTTCTGCTTTCTCTTCCCTTCGT	GTTCGTCCTGGGCCTCTAAG	ACGAAGGGAAGAGAAAGCAG	153	24	7	20	246	20	59.824	57.536	2.18	4.24	2.64015	G	286	TATGGGGTTCGTCCTGGGCCTCTAAGCCTACAATTGGCCCGTTGGGCCTCTAATGGGTTGGCGGGCTTTCAATGAGCCCGTCAGATCTGTTCTCAGCCCACCTACACAATCCCTTCGGTCTTCTcccccTcccccccGGTTTCACAGTGAGGCCCGTGGTCCACGTGCGGCCATTGGTGgagagagagaAAAagagagagagGAACagagagagACCTcccccTTTCTGCTTTCTCTTCCCTTCGTATGAAAtttttCAtttttttCTCCAGCTGACATCATAAAG
	M00842:287:000000000-BGGT4:1:1105:7605:20581	1	284	18	6	1	AGC	TGCTGCTGCTGCTGCTGC	NA	1	1	2	12	282	CGTCCTTCAGATACCTCAGCCCTTTTATTTGATTTTCTCCTCTTCCTAGATTTACTCtttttAttttttATGGGTTTCCTCTTGTTGCTTTCCCGACTGCTCTTATTTTCTTCCCTACCGATCTCCATGTCAGATATGGTGGCATCTTTCTTTTCATACCCTTCTTTGTGCTCCTTTACTAGAATAGCCTCTGCCTGCTTTTCCACTTGGCTTTCCTCTTCAGCAAAAtgctgctgctgctgctgcTCTGCAGAAGCATGACCATGCTTCCTGtatataGCC	CGTCCTTCAGATACCTCAGCC	GGCTATATACAGGAAGCATGGTCA	207	12	56	21	337	24	59.932	60.02	4.85	4.02	5.08804	F	342	GTCTCTATATTTGGGAGATGAGATGCTCCTCATGTCCATAAACCCATCCAGCCTTCGTCCTTCAGATACCTCAGCCCTTTTATTTGATTTTCTCCTCTTCCTAGATTTACTCtttttAttttttATGGGTTTCCTCTTGTTGCTTTCCCGACTGCTCTTATTTTCTTCCCTACCGATCTCCATGTCAGATATGGTGGCATCTTTCTTTTCATACCCTTCTTTGTGCTCCTTTACTAGAATAGCCTCTGCCTGCTTTTCCACTTGGCTTTCCTCTTCAGCAAAAtgctgctgctgctgctgcTCTGCAGAAGCATGACCATGCTTCCTGtatataGCCTTGTG
	M00842:287:000000000-BGGT4:1:1105:8397:4215	1	111	10	5	1	AG	AGAGAGAGAG	NA	1	1	2	81	246	AGGGAACAGTGCTGTAGAATGATGGGAAATGTCAATAGTGACCACAATTTGGTGTTCTCCATAGGATGATGCACATGGAACTCCTTTGGCAtgtgtgAGGGAAagagagagagAACATgaggaggagAGGAgggggAGAGAACAACATCTAGAGAtttttAGGAGAAAATAGGctctctTCTCATTAATCACTAATTACAACCTGGTATTTATACTAATTATAATTAGGTCAAAGCCTAAGCCCaa	AGGGAACAGTGCTGTAGAATGA	TTGGGCTTAGGCTTTGACCT	81	113	8	22	253	20	59.094	59.223	2.57	3.85	3.68384	F	283	ATGCAAAAGGGAACAGTGCTGTAGAATGATGGGAAATGTCAATAGTGACCACAATTTGGTGTTCTCCATAGGATGATGCACATGGAACTCCTTTGGCAtgtgtgAGGGAAagagagagagAACATgaggaggagAGGAgggggAGAGAACAACATCTAGAGAtttttAGGAGAAAATAGGctctctTCTCATTAATCACTAATTACAACCTGGTATTTATACTAATTATAATTAGGTCAAAGCCTAAGCCCaaaaaattttttGGCTAACCAAACATGAGACT
	M00842:287:000000000-BGGT4:1:1105:9262:16063	1	278	10	5	1	AG	TCTCTCTCTC	NA	1	1	5	5	91	ATGACTCTACTGCCCACCCTTGTCTtctctctctcTTTGGTACACTTGCCAATTAGCTTGATGTaagaagaagAAAGTTATTGCTCATGGC	ATGACTCTACTGCCCACCCT	GCCATGAGCAATAACTTTCTTCT	5	33	253	20	343	23	59.957	57.427	4.34	2.85	5.61667	F	419	TTCATGTTGTTTAATCTAGAATAATAAATaaaaatttttCATaaaaaaGGAACCAACTTTTcccccATGGTTTAGCATGGCATATTTTCAGCATTATTCTTATAACTTATTTCCCAAGTTCACCTAGAAATAAAGTTTTCTTTTCTTCTATGACATCTATGATCATTTACATGGACCAGATTATGCTCTTCTTATATGACCACTGAGTACTTGGTAAAGGaaaaaaaGaaaaaaaaTGGATTCTTTACAACTATGACTCTACTGCCCACCCTTGTCTtctctctctcTTTGGTACACTTGCCAATTAGCTTGATGTaagaagaagAAAGTTATTGCTCATGGCAACAAcccccATATGAACATGTTAGTAGaaaaaaGAGGATGTGTAGGAAAATATGA…
	M00842:287:000000000-BGGT4:1:1105:9563:14689	1	202	10	5	1	AG	TCTCTCTCTC	NA	1	1	4	63	249	GATGAGAACCCTCGACGGACCTCCTGGGACTTCTCGATCTTCCTGTCTAGCCAGATGACTAGCAAATAACCTGaaaaaTCACCTCACCAGCGATCGGCACCCAACTCTCAGCAGATTGGTTCCAGCTTCTAGCAAATAGAGGATCGTCTGTGGATTtctctctctcATcccccTTCTCCTTTGTTGTTCAGAACCGCTAGTGATCAGGCCTTTAAATAGGTAGCTCCCCGCTCAACAGCTCctctctCC	GATGAGAACCCTCGACGGAC	GGAGAGAGGAGCTGTTGAGC	136	63	46	20	294	20	59.899	59.824	4.79	4.26	0.276392	F	380	GATTGGAACCGCcacacacacacacaGCTGCGATCGGTTCAGTCTGATGAGAACCCTCGACGGACCTCCTGGGACTTCTCGATCTTCCTGTCTAGCCAGATGACTAGCAAATAACCTGaaaaaTCACCTCACCAGCGATCGGCACCCAACTCTCAGCAGATTGGTTCCAGCTTCTAGCAAATAGAGGATCGTCTGTGGATTtctctctctcATcccccTTCTCCTTTGTTGTTCAGAACCGCTAGTGATCAGGCCTTTAAATAGGTAGCTCCCCGCTCAACAGCTCctctctCCCTTCTAACAGCTGCAACAAAtttttGGTAGAAAATCGAAAATTCGTTTCAGCAACCAACTGAAACTTCCTTCAGTTGGATCGGTTG
	M00842:287:000000000-BGGT4:1:1105:9794:16998	1	115	10	5	1	AG	CTCTCTCTCT	NA	1	1	2	78	246	GGGCGTAGTTTGTTGCATTCTATCCCGGCTGCTTATGATGAAACTCGATCTACTGCTGAAGAAACGAGCTCAATTGCGTGGCGCATCTCCTTACTCTGctctctctctTGACAGATCCTCTCctctctTGCATCTGTTCATGCTTCGGCTAActctctctCCTTTGGACCctgctgctgCCAGAATTGCTTCTGTTGCTGATTCTGCTTCAACTCGCTCTGATGCTTCCTTAGCGACTTAACCTGT	GGGCGTAGTTTGTTGCATTC	ACAGGTTAAGTCGCTAAGGAAG	78	116	17	20	262	22	58.023	57.81	2.67	3.46	6.16683	B	263	GTAGATCGGAGAGCTGGGGCGTAGTTTGTTGCATTCTATCCCGGCTGCTTATGATGAAACTCGATCTACTGCTGAAGAAACGAGCTCAATTGCGTGGCGCATCTCCTTACTCTGctctctctctTGACAGATCCTCTCctctctTGCATCTGTTCATGCTTCGGCTAActctctctCCTTTGGACCctgctgctgCCAGAATTGCTTCTGTTGCTGATTCTGCTTCAACTCGCTCTGATGCTTCCTTAGCGACTTAACCTGTA
	M00842:287:000000000-BGGT4:1:1106:10074:6821	1	163	10	5	1	AG	AGAGAGAGAG	NA	1	1	2	4	99	TGAGCCACCGTGGATATTGTATAAGCTGAAGAGGAGTTGATCTGAAGAGAAGCTAACCCCAagagagagagCTGAAGACCTTGTTCAGTCTTATTTGGT	TGAGCCACCGTGGATATTGT	ACCAAATAAGACTGAACAAGGTCT	41	4	102	20	200	24	59.091	58.058	2.71	3.85	6.8507	A	206	TCGTAAGATTATgggggAGGCAGTGGATAGTTAATGCTATCCACATTGTGGTCGTTACCCGAGTATTGCAGGTAATAGGCTGATTGTCAGTTATTGGGCACTGAGCCACCGTGGATATTGTATAAGCTGAAGAGGAGTTGATCTGAAGAGAAGCTAACCCCAagagagagagCTGAAGACCTTGTTCAGTCTTATTTGGTATTACG
	M00842:287:000000000-BGGT4:1:1106:10711:5924	1	237	14	7	1	AG	TCTCTCTCTCTCTC	NA	1	1	4	18	236	AAGGTGGTGTAGTGGGAAGCAGAAGGAAGGAGGAAGAACTTTGAGAAttttttCGGTGTTCCCCTCCCCTCTGCTTCCTTCTTCTCTTACCAAATCCCTCCTCTTCTCCTCCCTTCCTCTCAGTCTTCCCCTCCTTCTTctcctcctcCTGGATTTCTCCCCTccccccTCctctctGGACTtctctctctctctcTTTCTATCTGTTTCTTTTCCctctctTGGATCATCTTCGG	AAGGTGGTGTAGTGGGAAGC	CCGAAGATGATCCAAGAGAGGG	162	18	55	20	290	22	59.599	59.963	3.86	4.3	2.43758	F	294	CATTTCAGGAGTTTGTTAGGGGTGCCAGGAGCGTGTTAGAGGCACTATTATAAGAAGGTGGTGTAGTGGGAAGCAGAAGGAAGGAGGAAGAACTTTGAGAAttttttCGGTGTTCCCCTCCCCTCTGCTTCCTTCTTCTCTTACCAAATCCCTCCTCTTCTCCTCCCTTCCTCTCAGTCTTCCCCTCCTTCTTctcctcctcCTGGATTTCTCCCCTccccccTCctctctGGACTtctctctctctctcTTTCTATCTGTTTCTTTTCCctctctTGGATCATCTTCGGTTTC
	M00842:287:000000000-BGGT4:1:1106:11191:9740	1	134	18	9	1	AG	AGAGAGAGAGAGAGAGAG	NA	1	1	4	33	152	TCCATGCAACTCCATAGCTCAAGTTGACAAGTATTGTCGACTTCATCACTACATagagagagagagagagagAAGAACAACATGAAACAGCTGATAGCAATTATGTTGAGGGGCAAATTCATGCCCCTCGCATCACCTTGCATCTGTGAGGG	TCCATGCAACTCCATAGCTCA	CCCTCACAGATGCAAGGTGA	33	60	80	21	231	20	59.161	59.674	4.26	4.02	2.16529	A	362	GTTGCATATCCCCTTGTATTAACTATTTAGTTGGTCTCTTATGAGGCCCAGCCCAACCCATGCTGCATGGGCATGATCATCCATGCAACTCCATAGCTCAAGTTGACAAGTATTGTCGACTTCATCACTACATagagagagagagagagagAAGAACAACATGAAACAGCTGATAGCAATTATGTTGAGGGGCAAATTCATGCCCCTCGCATCACCTTGCATCTGTGAGGGGTTATGGTGGTAAACCCTAGCCATCAGACCGGCCAAGAAGGTGAGGAAATGTGAAAATAAAagagaggagagagaaaaaaTCActctctctATTTCTTCCTCACTGAAAActctctctTCCGATCTACCGC
	M00842:287:000000000-BGGT4:1:1106:11430:7751	1	219	12	6	1	AT	TATATATATATA	NA	1	1	2	10	186	ACTACTCGAGGCCTTATAAGCTATATCTATAGCTTTGTGGTTCTATTTTAGATATGCAAGCATCCttttttttttttGGTTGGCACATATAATTTAAGCATTCTAATTTTATCTTTCCATAACTTTTAGGAGGATTTTGGtatatatatataAACTGGTGACCCCAAGGTCAAAGATGATGTAAGT	ACTACTCGAGGCCTTATAAGCT	ACTTACATCATCTTTGACCTTGGG	118	10	79	22	264	24	58.165	58.744	3.74	4.12	9.09141	F	311	TTCTTATTACTATTACTACCGATATGGTAGATACTTGCAGGTTAATATTATTGTTCAGTTGACctctctttttttAAAACTACTCGAGGCCTTATAAGCTATATCTATAGCTTTGTGGTTCTATTTTAGATATGCAAGCATCCttttttttttttGGTTGGCACATATAATTTAAGCATTCTAATTTTATCTTTCCATAACTTTTAGGAGGATTTTGGtatatatatataAACTGGTGACCCCAAGGTCAAAGATGATGTAAGTATAGCTGTCGAGATCATTGTGGTTAGTTGCATTGTAGTAATTCTATG
	M00842:287:000000000-BGGT4:1:1106:11584:13089	1	34	16	8	1	AG	CTCTCTCTCTCTCTCT	NA	1	1	9	1	140	TTTCTTCTCCTCTTTCTCATGTTCTCctctctctctctctctTGTTTCTCTTCTTCCTCAAAGATCCCAGTACAATCTGTTTGTGCAGAAACAGGGCTATCGATGGATGCTGGTTTGGTGGCATTGATTTGAAGATCGGC	TTTCTTCTCCTCTTTCTCATGTTCT	GCCGATCTTCAAATCAATGCCA	1	76	8	25	147	22	57.928	59.9	3.01	4.92	9.17185	A	319	TtctctcTTTCTTCTCCTCTTTCTCATGTTCTCctctctctctctctctTGTTTCTCTTCTTCCTCAAAGATCCCAGTACAATCTGTTTGTGCAGAAACAGGGCTATCGATGGATGCTGGTTTGGTGGCATTGATTTGAAGATCGGCTCTTAGCCAGATTTTGATCTAACTCCTAAACAGGGTGTTGTTCTGAATCTGCAAACAAGGGTGCCAGGATGTCTTGTTGGTGGTCGTGCTTCAAAGaaaaaCCAAAACCTAGGTGCTTGATTGTTATGTGATTGAATCGAGACTCAAGGGAAAACGATGGATGGTAGGCGGG
	M00842:287:000000000-BGGT4:1:1106:11822:12749	1	41	12	6	1	AT	ATATATATATAT	NA	1	1	5	11	99	ATTCACCACACGCAATATACAAATTtatataTTAatatatatatatTTAAATTATTGTTATCAAAATTTTATCAACCCGCACGTTGGATGCAGGATGTG	ATTCACCACACGCAATATACAAA	CACATCCTGCATCCAACGTG	11	33	7	23	105	20	57.111	59.551	2.83	4.49	6.33768	B	196	TTCTTTATTCACCACACGCAATATACAAATTtatataTTAatatatatatatTTAAATTATTGTTATCAAAATTTTATCAACCCGCACGTTGGATGCAGGATGTGCTGGAATGTTAGTGATGTAATTACTGAAATGGCTATCGTCTCCTTCTTCTCCGGTAAGCTCCGGAAATCTACAAAGAAGTCTCCTAGCCAG
	M00842:287:000000000-BGGT4:1:1106:12689:21130	1	182	24	8	1	AAG	TCTTCTTCTTCTTCTTCTTCTTCT	NA	1	1	4	43	173	CAATGTTACAACCCACGGCGTTGGTATGGCCCTTAGCCTTATGGGCCGAGCCTTGCCAGGAACTCGAAGGGCTGAGTTCCGCTGGCtcttcttcttcttcttcttcttctTCCAGTCATAGCTTACCGGATTGATTAGTTGATGCAGTAGATAGCCATTTGGATCCCGAAAGC	CAATGTTACAACCCACGGCG	GCTTTCGGGATCCAAATGGC	66	43	96	20	268	20	60.11	59.897	6.46	4.4	0.21299	A	334	TAGTGTGCATGTTGGTGCGTAAATTTGTGCACCGTAGATAAAGTAACCCTCCAAGATAATACTCTTCCTCTGCTTCTCAATCTTGACAGGCCCTCCAATGTTACAACCCACGGCGTTGGTATGGCCCTTAGCCTTATGGGCCGAGCCTTGCCAGGAACTCGAAGGGCTGAGTTCCGCTGGCtcttcttcttcttcttcttcttctTCCAGTCATAGCTTACCGGATTGATTAGTTGATGCAGTAGATAGCCATTTGGATCCCGAAAGCCAGAGCTGCtatataTGAATGTGGCACCTGCTATCAAGAAAGTTTCTTTGCACTGCTTTTATATTC
	M00842:287:000000000-BGGT4:1:1106:13147:24680	1	123	32	16	1	AT	TATATATATATATATATATATATATATATATA	NA	1	1	3	3	175	AGGACTCACGACAAGTACCCTTTAAATAATTAtttttttATATGAGAACTTGTTATAGtttttATTCACAATAGATAAGGGAGATAGAACCAATCTATTTCCCTCTCAAATTCAAATtatatatatatatatatatatatatatatataTTTCACATGTCAACCACAAACACTCA	AGGACTCACGACAAGTACCCT	TGAGTGTTTGTGGTTGACATGTG	96	3	6	21	180	23	60.203	59.872	4.34	3.21	4.33144	F	393	CATAGAGGACTCACGACAAGTACCCTTTAAATAATTAtttttttATATGAGAACTTGTTATAGtttttATTCACAATAGATAAGGGAGATAGAACCAATCTATTTCCCTCTCAAATTCAAATtatatatatatatatatatatatatatatataTTTCACATGTCAACCACAAACACTCAAAATTCTCACGTCTTCTTTTCACGACACTTCTCTTACATGGGAACTATTCTTGCGTGAGAGCTTCCTTCACAAATTCTTCATATCTCACTACTTTTCACAATCACTtctctcATGAAATGACCTCTTCATGTGTACctctctCACAAATTGACTTCTtctctcACAAGTCAACACATTTTCTTCTCTTACGTAAGAACTATTCTTGTGTAAGA
	M00842:287:000000000-BGGT4:1:1106:13439:25194	1	54	153	8	5	AT	TATATACATATATATATACATATATAAACATATATATATATATATACACACACATATGTATACTTATCCATACATATATTTATATATATATATACATAGATATATATATACATATATACATATATACACATATATACATACATATATATATAT	NA	1	1	7	4	233	GGATAAAtgtgtgCGTATAGTTGTTAGTATTTTGTTCTCTAtgtgtgtgTCATtatataCatatatatatACatatatAAACatatatatatatatatacacacacATATGTATACTTATCCATACatatatTtatatatatatataCATAGatatatatatACatatatACatatatACACatatatACATACatatatatatatACATACTGTTACATCCAAATACCTGGA	GGATAAATGTGTGCGTATAGTTGTT	TCCAGGTATTTGGATGTAACAGT	28	4	1	25	233	23	57.988	57.228	2.83	3.55	12.7842	G	235	GGATAAAtgtgtgCGTATAGTTGTTAGTATTTTGTTCTCTAtgtgtgtgTCATtatataCatatatatatACatatatAAACatatatatatatatatacacacacATATGTATACTTATCCATACatatatTtatatatatatataCATAGatatatatatACatatatACatatatACACatatatACATACatatatatatatACATACTGTTACATCCAAATACCTGGACC
	M00842:287:000000000-BGGT4:1:1106:13859:22946	1	90	28	14	1	AG	AGAGAGAGAGAGAGAGAGAGAGAGAGAG	NA	1	1	12	10	190	AGAGGGAGATAGAAAGAAAGGAAGAGATAGAGATagagagagagagagagagagagagagagGGCAGTGGCGCTGGAATAGAGCTGAGGGAGAGGGCAGTGGTGTTGGAACAGAGCCGAGGGAGAGGACTTTCGAAGCCTCCTCGCTTCCATGCATCAGAATAGGGGCAGAGCCCTTGTTTCGAAAGCAA	AGAGGGAGATAGAAAGAAAGGAAG	TTGCTTTCGAAACAAGGGCTC	10	107	56	24	245	21	57.193	59.663	3.46	4.7	8.14342	A	354	GGAACAAGGgagagaGTGGGAGAGGGCGGTagagagagagagagTCTAgggggggAGAGGGAGATAGAAAGAAAGGAAGAGATAGAGATagagagagagagagagagagagagagagGGCAGTGGCGCTGGAATAGAGCTGAGGGAGAGGGCAGTGGTGTTGGAACAGAGCCGAGGGAGAGGACTTTCGAAGCCTCCTCGCTTCCATGCATCAGAATAGGGGCAGAGCCCTTGTTTCGAAAGCAAATAGAGGCTTCGGCCCCTTTTAAGAAATTTCAAGGaaaaaaaaaaGTGATGTTAGTAGTGGCCGCCGACTTCACTTaaaaaaTCATTaaaaaaTATAAAAgggggCCTA
	M00842:287:000000000-BGGT4:1:1106:14188:10475	1	113	15	5	1	AAG	TCTTCTTCTTCTTCT	NA	1	1	2	13	126	CGTCACCATTCACCCTACCTATGAGTAGGCGGGtcttcttcttcttctGGTTTCATTTTGTTGAAACCTTCCAAACTTTGAACTACCCTGTCTCTAGGTCTTTGATTGTTCTCCAGTCTTTCAccc	CGTCACCATTCACCCTACCT	GGGTGAAAGACTGGAGAACA	13	58	80	20	205	20	59.097	57.069	3.08	3.18	3.83336	F	248	AAGCGTCAGGCGATCGATCGGCCAGAACTGACTCCATGTGTCACAATCTAAGAAGTTGCTCATGAGCTGAGGCTTCAATCGTCACCATTCACCCTACCTATGAGTAGGCGGGtcttcttcttcttctGGTTTCATTTTGTTGAAACCTTCCAAACTTTGAACTACCCTGTCTCTAGGTCTTTGATTGTTCTCCAGTCTTTCAcccccTAAGGTTGGCTGCTTGTTCTTTCCCCATCATTTAGGTCTCG
	M00842:287:000000000-BGGT4:1:1106:14674:13944	1	105	30	10	1.5	AG	TCTCTCTCTTTCTCTCTCTCTCTCTCTCTC	NA	1	1	4	4	101	tctcTTGGATCTCCTGGCCTCCCTtctctctcTTtctctctctctctctctctcAAAttttttCCCCAAAAGCCTTGTTCACGAGAAACCATTCCCTTGCG	TCTCTTGGATCTCCTGGCCT	CGCAAGGGAATGGTTTCTCG	4	27	81	20	181	20	59.659	59.552	5.19	4.04	0.789059	F	199	ATTTGGGAtttttGTTACAATGTTTCTtcctcctccTttcttcttcCTTCTCCTCTCCCAGATTCCCTCTTCCCCTtctctctcTTGGATCTCCTGGCCTCCCTtctctctcTTtctctctctctctctctctcAAAttttttCCCCAAAAGCCTTGTTCACGAGAAACCATTCCCTTGCGTTTCCCACCAACCCACCT
	M00842:287:000000000-BGGT4:1:1106:15075:7955	1	158	12	6	1	AG	TCTCTCTCTCTC	NA	1	1	2	29	118	AGGAGGCATCATGCTCAGATCAATGCTCCCCACCATATGACAAACTAATTtctctctctctcATGGGTCaaaaaaCTTTCTGCtttttGGTGGGACCCCAGTGGTATCGAATGATCCA	AGGAGGCATCATGCTCAGATC	TGGATCATTCGATACCACTGGG	29	34	108	21	225	22	59.652	59.631	2.75	4.45	3.71691	F	225	AAGATGAAGGAGAGGAGAAGAATGTTGaaaaaTAAGaaaaaaTAATTATAAATACTTACTCCCACATAGGTAAAATAATCATAAAAGATGATGtttttATGCtttttAGGAGGCATCATGCTCAGATCAATGCTCCCCACCATATGACAAACTAATTtctctctctctcATGGGTCaaaaaaCTTTCTGCtttttGGTGGGACCCCAGTGGTATCGAATGATCCA
	M00842:287:000000000-BGGT4:1:1106:15149:3319	1	257	14	7	1	AG	CTCTCTCTCTCTCT	NA	1	1	4	83	244	ACGAAGCCTTACCCAATGGACAATGTTTTCTATGTCGAGAAGACAAGTTCACATGAGGACCAACTTAATCTACCTCCTCAtttttCTCctctctTTCTCCCGCctctctctctctctTGTTGGGGTAAATATGGTGCTCCCAAGTCTTGGGAGGCCATGAGAGGAGTCATAGGCTTGGCTCCAGGATTCTAGGACAGGTTTGGATCCTAGGGCTAGGACGGGTTTGGTCCTAGGGTGGAGGTTC	ACGAAGCCTTACCCAATGGA	GAACCTCCACCCTAGGACCA	83	107	154	20	397	20	59.011	60.253	3.41	4.02	1.24139	F	425	CATTTTGATAACTAATGTGATTTaaaaaTATTATTCCATaaaaaTaaaaaCATACATTGGTGCCAGCATATTTGAATTTCATGCCAAATAGaaaaaCTTGACATGAGTTTCGCCTTCTTCaaaaaaCCAATTAGTGGGaaaaaGAAAATAGAGACGAAGCCTTACCCAATGGACAATGTTTTCTATGTCGAGAAGACAAGTTCACATGAGGACCAACTTAATCTACCTCCTCAtttttCTCctctctTTCTCCCGCctctctctctctctTGTTGGGGTAAATATGGTGCTCCCAAGTCTTGGGAGGCCATGAGAGGAGTCATAGGCTTGGCTCCAGGATTCTAGGACAGGTTTGGATCCTAGGGCTAGGACGGGTTTGGTCCTAGGGTGGAGGTTCAG…
	M00842:287:000000000-BGGT4:1:1106:15311:15740	1	123	10	5	1	AG	CTCTCTCTCT	NA	1	1	2	4	99	ACAAGTAGGCGGGATGAAGATTAAGAATTTCCTATAATACTATGTATTGGAGTGTGATCATAAAActctctctctAACAAAAGCACGGCATCTTCCATT	ACAAGTAGGCGGGATGAAGA	AATGGAAGATGCCGTGCTTT	45	4	58	20	156	20	58.431	58.451	2.87	3.51	3.11771	A	371	AACACAGTCAAAAGTTAATTTAATCTAATATTTTCTCaaaaaaaaTAGTTGTTCTGTACAAGTAGGCGGGATGAAGATTAAGAATTTCCTATAATACTATGTATTGGAGTGTGATCATAAAActctctctctAACAAAAGCACGGCATCTTCCATTATaaaaaTACTAAAATGATCTAATATCTTGATAATACTTAGAGGATATTGCCAATTTTCAGTTCACTTGGTATGGATGCAAGCTTGCAGATCCttttttCTGAATTTGCAAACGATAATAAATTATAGAAAAGGATTATCTGTCTCAATGTTTAAAGTATTACCAATAACTTGCCATTATGGTATGCTGCTTTACCTACAAATCGTGCATTGTGG
	M00842:287:000000000-BGGT4:1:1106:15583:26308	1	134	12	6	1	AG	TCTCTCTCTCTC	NA	1	1	4	109	297	CCGTGCATagagagGGCATTCCTGGAGCACCCAGAAGCTTCTGGGATGCCCATGAATGTGTTAGGGGATGTGCAAGTGGAAGGGATAGCAGTAGTGCTTGgagagagaAGAAGCAGAATTGGCTTTTGAtctctctctctcCCTATCTCTTTCATTCACTCGCTCCTTGTCCGAGCAAGGTTTTGTCACCAATCGTTAGGAGATCATCGTTGCTGGTGACCGTCAAGCCAAGGTGAGGTGTTTTGACtatataTTTACTATTCTTTTGAGTTTTCAGGCCCAGATGACGGAGGTTCG	CCGTGCATAGAGAGGGCATT	CGAACCTCCGTCATCTGGG	109	137	5	20	301	19	59.893	59.858	3.56	4.45	1.24934	F	343	CAGCCCGTGCATagagagGGCATTCCTGGAGCACCCAGAAGCTTCTGGGATGCCCATGAATGTGTTAGGGGATGTGCAAGTGGAAGGGATAGCAGTAGTGCTTGgagagagaAGAAGCAGAATTGGCTTTTGAtctctctctctcCCTATCTCTTTCATTCACTCGCTCCTTGTCCGAGCAAGGTTTTGTCACCAATCGTTAGGAGATCATCGTTGCTGGTGACCGTCAAGCCAAGGTGAGGTGTTTTGACtatataTTTACTATTCTTTTGAGTTTTCAGGCCCAGATGACGGAGGTTCGGTGGGAATGAAGGGGATAGATGGCCAAATTAGCCGAAGGGTA
	M00842:287:000000000-BGGT4:1:1106:15625:1986	1	156	10	5	1	AG	CTCTCTCTCT	NA	1	1	4	78	247	TACCAACCCTAGCATAGCCCCAACGGTAGCTGGAGGCTACTGGAGGCTAGCGTTGGTCCACAAACTGATGTAGGTGAGGAagagagTAGAGGGAGGAGGTCAAATgaagaagaaagagagACCctctctCCCCAcccccctctctctctTACTATTATCAAGATCTATGTGGGGAGAAGGGGAAATAGTGGGCTTAGGGAAGCCCACTACCAAGCTCATGGTGGGCCTAGGCCCGACTCACTACaga	TACCAACCCTAGCATAGCCC	TCTGTAGTGAGTCGGGCCTA	119	78	17	20	263	20	58.569	59.378	5.19	3.93	2.05313	F	464	GTTCGACTAGCTCTTTTACCAACCCTAGCATAGCCCCAACGGTAGCTGGAGGCTACTGGAGGCTAGCGTTGGTCCACAAACTGATGTAGGTGAGGAagagagTAGAGGGAGGAGGTCAAATgaagaagaaagagagACCctctctCCCCAcccccctctctctctTACTATTATCAAGATCTATGTGGGGAGAAGGGGAAATAGTGGGCTTAGGGAAGCCCACTACCAAGCTCATGGTGGGCCTAGGCCCGACTCACTACagagagGCAAAACCCAGaaaaaGAAAGaaaaaGaaaaaGGAGAAAGGaagaaagaaagaGaaaaagaagaagaaGAGGAAAGATAAGAAGgaaagaaagaaaGGAagagagAAGCAGGCCTTACCAGCTtctctcCCTC…
	M00842:287:000000000-BGGT4:1:1106:15642:21748	1	321	10	5	1	AG	CTCTCTCTCT	NA	1	1	2	29	239	CGGCACCTAGTCCACTTGTTAGTAGATTTTGAAATTCAGGTGCTGGATTTGGAATCCCCTCATCAATGTCCTCCAGGTTAATGAGAGGGGCTTTTGCAAGCGATTCTACCACCTGACTTCTCCCTATCTCTAAAGATGACCTAGAGCAGGCCTTCTTTTCAACGATGATtatataGAGAGctctctctctCGGTAGTTCGCTTCATCTTCCGAACTACCTTCTTTGCCCTCTTCGCCAC	CGGCACCTAGTCCACTTGTT	GTGGCGAAGAGGGCAAAGAA	160	29	141	20	379	20	59.965	60.889	2.83	2.52	0.924082	B	455	CAGATTGTGGAGGATTGACTCCCCTCCTCGAAGACGAACTTCAAATGTGGTCATGCCTGGCTCACCCAATGGGACCTCAGTGATTATGGGGCAAATCTTGGTCCCTAAAGATGGTGGGATGGCCCGTGACGATGAAGCTTCGGCACCTAGTCCACTTGTTAGTAGATTTTGAAATTCAGGTGCTGGATTTGGAATCCCCTCATCAATGTCCTCCAGGTTAATGAGAGGGGCTTTTGCAAGCGATTCTACCACCTGACTTCTCCCTATCTCTAAAGATGACCTAGAGCAGGCCTTCTTTTCAACGATGATtatataGAGAGctctctctctCGGTAGTTCGCTTCATCTTCCGAACTACCTTCTTTGCCCTCTTCGCCACCCTCTGAATATCTTTACTTG…
	M00842:287:000000000-BGGT4:1:1106:15687:7742	1	221	18	9	1	AG	CTCTCTCTCTCTCTCTCT	NA	1	1	6	1	97	gggTGgagagaAGGCTACAAGAAGAGTATTTCTCTTCtttttCATCCAAGCCAGCATCctctctctctctctctctCAATCACTCACCCTCCCAAGC	GGGTGGAGAGAAGGCTACAAG	GCTTGGGAGGGTGAGTGATT	37	1	163	21	259	20	59.792	59.67	3.16	2.57	1.53789	F	276	CCTATTGGCCCAGTAAGGCTATAGGCCCAGTAAGGGCTCAAATCAGATCTAAGAAATGAGGAGGCTTAGCAAGGGCCTTGTAGTGGCCCAAGGAGAGCATGGTGAATTGATAAAGAAATgagagaTTCAAAATGACATCTGAAAGATAAAAGAAAGAGGAgggggTGgagagaAGGCTACAAGAAGAGTATTTCTCTTCtttttCATCCAAGCCAGCATCctctctctctctctctctCAATCACTCACCCTCCCAAGCACGCActctctCCCACT
	M00842:287:000000000-BGGT4:1:1106:17338:14866	1	129	10	5	1	AG	TCTCTCTCTC	NA	1	1	4	62	186	TGAACTAAGGTAGCTTTCATACTGTCTAAttttttCtttttttttCCtttttCTTttcttcttctttttcttcttcttTTTCttttttctctctctcTAtttttttAATAGTGCCAAGCATCCTGGCCTTCCCTTCACTGTTTGACACGAACCTCCACACTTGACTTAGGTGCAGAGACCCGGTTA	TGAACTAAGGTAGCTTTCATACTGT	TAACCGGGTCTCTGCACCTA	62	69	42	25	227	20	57.759	59.96	3.55	3.08	7.2811	F	250	CCTATTTTGGTTAATTTTCtatataCCCCAAATTAAGATCATGAACTAAGGTAGCTTTCATACTGTCTAAttttttCtttttttttCCtttttCTTttcttcttctttttcttcttcttTTTCttttttctctctctcTAtttttttAATAGTGCCAAGCATCCTGGCCTTCCCTTCACTGTTTGACACGAACCTCCACACTTGACTTAGGTGCAGAGACCCGGTTACTAAGCTTAGGGCAATCCACATA
	M00842:287:000000000-BGGT4:1:1106:17425:11322	1	236	16	8	1	AG	TCTCTCTCTCTCTCTC	NA	1	1	4	31	274	TCTCCTCCCTCTAATGGGCCAGCCTATGAGCAAGGCCTGCTTGTACTTTTCCTTCTCTTGCATGAtttttGATGCACAAGAAGgagagagaAGGgagagagaGTGCACTAGTGCTCACCTCCGATGGCTGCCGTTGCCACTGGGGTTGCGTTGGAAGTTGGGAGAAGGGCCGGCATGCCCTCTATCTTCTTttcttcttcttcCTCTtctctctctctctctcTATCTTTGTTCTTGGGCTCTTAGCAGCCACCACGATAGTTGTGAGCCCAGC	TCTCCTCCCTCTAATGGGCC	GCTGGGCTCACAACTATCGT	187	31	29	20	302	20	60.105	60.108	5.8	3.73	0.213072	F	327	tttttCttttttttttctctctGGGCTTTCTCCTCCCTCTAATGGGCCAGCCTATGAGCAAGGCCTGCTTGTACTTTTCCTTCTCTTGCATGAtttttGATGCACAAGAAGgagagagaAGGgagagagaGTGCACTAGTGCTCACCTCCGATGGCTGCCGTTGCCACTGGGGTTGCGTTGGAAGTTGGGAGAAGGGCCGGCATGCCCTCTATCTTCTTttcttcttcttcCTCTtctctctctctctctcTATCTTTGTTCTTGGGCTCTTAGCAGCCACCACGATAGTTGTGAGCCCAGCCCTAGCCATTGCCAAGGTCGAGAAG
	M00842:287:000000000-BGGT4:1:1106:17868:14920	1	132	20	10	1	AT	TATATATATATATATATATA	NA	1	1	2	67	206	tGGATGGGAGATAGACAGTGgagagaTAATAAAATATACTATTTTAtttttATTgagagaTGTCTGATGTGATAGTGATAATCCAAACGGGCAATAGGTtatatatatatatatatataTCGAAGCaaaaaaTAGTTTTGTGCAGATGGAAGAATGAAGGACAATAAGAATGATTTCAAAATCATGACCTAAGGGCACAAAGAGCT	TGGATGGGAGATAGACAGTGGA	AGCTCTTTGTGCCCTTAGGT	77	67	33	22	238	20	59.753	58.932	4.02	3.08	3.31549	F	250	AATCATTTAGGCCCTTCCCCTCTTCCtttttttGGATGGGAGATAGACAGTGgagagaTAATAAAATATACTATTTTAtttttATTgagagaTGTCTGATGTGATAGTGATAATCCAAACGGGCAATAGGTtatatatatatatatatataTCGAAGCaaaaaaTAGTTTTGTGCAGATGGAAGAATGAAGGACAATAAGAATGATTTCAAAATCATGACCTAAGGGCACAAAGAGCTTAGTACTTATTT
	M00842:287:000000000-BGGT4:1:1106:19935:21046	1	275	21	6	1.5	AT	TATATATATATAAATATATAT	NA	1	1	4	61	217	CGGCTGCTCTGCTAGGTaaaaaaaaaCTCaaaaaCACAGGTCACAATCAGAAGAGAAgggggATAATTTTGAACCGTTGGATTTTGATCTAACTATTCATAATAATTTTAATAATtatatatatataAatatatatTATATTATATTTTATAATCAGGTCTCGGGTCTGTCGAGTATGGATATTAAATATCCAGATGGTGTGGGCACCAGATTCAGa	CGGCTGCTCTGCTAGGTAAA	TCTGAATCTGGTGCCCACAC	95	61	160	20	376	20	59.824	59.963	2.01	3.82	0.212492	F	445	GTGGAggggggAAGGGGTGAACGGGAAGCCAGGGTCCTCGGGGAATGTCGGTGGAggggggggAGCTGGGGTCTTGGCCGGTAGCCACAGTTTGGCCAATCAGTGGAGGGGCAGGAGGTGGGAGGCTGGGAGTGATGAAGAGATGAGaaaaaTTAGGGCCGGCTGCTCTGCTAGGTaaaaaaaaaCTCaaaaaCACAGGTCACAATCAGAAGAGAAgggggATAATTTTGAACCGTTGGATTTTGATCTAACTATTCATAATAATTTTAATAATtatatatatataAatatatatTATATTATATTTTATAATCAGGTCTCGGGTCTGTCGAGTATGGATATTAAATATCCAGATGGTGTGGGCACCAGATTCAGaaaaaGGCTTCAACTAATACAAAT…
	M00842:287:000000000-BGGT4:1:1106:20086:24863	1	135	10	5	1	AG	TCTCTCTCTC	NA	1	1	4	85	234	CATGGGACCCTCAACATCGATTACAACTATTTTAGTCATTGATTCCCCTGTTTGTCTCATCAATCCCTTATATGGTGCTATCACTAGGGCCTCAACAAAGTAGATTTAAGGAGCACTCTtctctctctcTTTATCTGTCCGTCTGTCTTCTTTCCCTTCTTTATAGTAAGCATGCGATTCAAATCTCCTTCTTTTAGGAGATTGTTGAGTTTTATTGCACAAGAGCTTCCCTTG	CATGGGACCCTCAACATCGA	CAAGGGAAGCTCTTGTGCAA	99	85	16	20	249	20	59.459	58.679	3.59	4.08	1.86287	A	474	GAGGACAACCAATCCCATGGGACCCTCAACATCGATTACAACTATTTTAGTCATTGATTCCCCTGTTTGTCTCATCAATCCCTTATATGGTGCTATCACTAGGGCCTCAACAAAGTAGATTTAAGGAGCACTCTtctctctctcTTTATCTGTCCGTCTGTCTTCTTTCCCTTCTTTATAGTAAGCATGCGATTCAAATCTCCTTCTTTTAGGAGATTGTTGAGTTTTATTGCACAAGAGCTTCCCTTGTTCCCTGGGCCATCTGATGGCCTATTTGAAAATTGGTTATCGATCTCGTTATTTCGATATACCCGGACCTACCGATCTGACTCACCCAAACTTGCCAACCAGGGAGCCAAATGTCAACCTGTACAATTGGCATCTACCAGAGTAATGAAT…
	M00842:287:000000000-BGGT4:1:1106:20535:8166	1	136	10	5	1	AG	GAGAGAGAGA	NA	1	1	4	56	173	acacTCTACTCTTCTGCGGCAGAAAGGTTGGTCACCAGTTGAGCGTGTGCGTGGGACGTTGAGGAAGAAGAGAAATgagagagagagggggAGAGAATGTgagagagaGGAGAAGAAAACCATCTAAAAtttttttGAGaaaaaGCTATTCCTTGTATTACTCCACGATCTCA	ACACTCTACTCTTCTGCGGC	TGAGATCGTGGAGTAATACAAGGA	56	63	60	20	232	24	59.472	58.802	6.53	3.36	5.72668	F	270	AATCTCCTCTATTTTGCTACTGTGAATAGTAGATAATAACCACCaaaaaCAGAGAATacacacTCTACTCTTCTGCGGCAGAAAGGTTGGTCACCAGTTGAGCGTGTGCGTGGGACGTTGAGGAAGAAGAGAAATgagagagagagggggAGAGAATGTgagagagaGGAGAAGAAAACCATCTAAAAtttttttGAGaaaaaGCTATTCCTTGTATTACTCCACGATCTCAAAATCATAAGGATATTTATACCCGTTACATGTGGGTTT
	M00842:287:000000000-BGGT4:1:1106:21002:9174	1	49	16	8	1	AC	CACACACACACACACA	NA	1	1	4	3	231	AAGAGATTAGGGCATTGTATGGTTTGcacacacacacacacaACaaaaaGaaaaaGAAAAGAAAAGTAGCAAAAGGAACATCTTGCATCAAAACAATGTCTCATCGCTCCTTGAAAATAGAAGATTCaaaaaTAATAATAGGAGTTAGTTAAGAATTATTTTAGAAAATGATAAGtttttACTTAACTAATTTACTAGATACTAGTACTACCCTAATGACATGCTTCATCT	AAGAGATTAGGGCATTGTATGGT	AGATGAAGCATGTCATTAGGGT	3	167	23	23	253	22	57.347	57.215	3.55	4.34	10.4386	F	342	ATAAGGATTAGCTAGAAAGCATAAGAGATTAGGGCATTGTATGGTTTGcacacacacacacacaACaaaaaGaaaaaGAAAAGAAAAGTAGCAAAAGGAACATCTTGCATCAAAACAATGTCTCATCGCTCCTTGAAAATAGAAGATTCaaaaaTAATAATAGGAGTTAGTTAAGAATTATTTTAGAAAATGATAAGtttttACTTAACTAATTTACTAGATACTAGTACTACCCTAATGACATGCTTCATCTATTATCTAAAAGGAGATCTTTCACTTAGGGTGTGAGgagagaCCTTCAAACTCGAGCAAGCTCGTATAAGATATTAAGAGTTTCTAGTA
	M00842:287:000000000-BGGT4:1:1106:21221:2540	1	134	14	7	1	AC	TGTGTGTGTGTGTG	NA	1	1	4	13	156	GCCATTCCCATCCAGCCTTTCACATAGATCCAAACAGTCCTTCACAAAATCAACATCATAATGAATCTATTATGAAAGTTTGAAGACGAATAtgtgtgTACTTTAtgtgtgtgtgtgtgTAGATAATAAATTGGACACCTTACAATTGGATATGGG	GCCATTCCCATCCAGCCTTT	CCCATATCCAATTGTAAGGTGTCC	85	13	29	20	184	24	60.689	59.173	3.11	4.02	5.51603	B	186	TGTAGCATCCATTTTCACTATAGTCAAAGCCATTCCCATCCAGCCTTTCACATAGATCCAAACAGTCCTTCACAAAATCAACATCATAATGAATCTATTATGAAAGTTTGAAGACGAATAtgtgtgTACTTTAtgtgtgtgtgtgtgTAGATAATAAATTGGACACCTTACAATTGGATATGGGTC
	M00842:287:000000000-BGGT4:1:1106:22313:19245	1	294	16	8	1	AG	AGAGAGAGAGAGAGAG	NA	1	1	10	1	127	AACGAACGATGCCCTGTTCTCTGTAGTGCTTCTGGTATTCCACAATCCtttttGGCTGGAGTCTTTGAGGAAGAagagagAACGAGAAagagagagagagagagGAGAACATgagagagaACGTGAG	AACGAACGATGCCCTGTTCT	CTCACGTTCTCTCTCATGTTCT	68	1	206	20	332	22	59.965	57.567	3.01	3.01	4.46808	F	332	AATAACTGTagagagCCAGCGAAttcttcttcAGAAATCCCGCTTGTTTTCTTCCTGTGAATCACAATCCCAAGCCACAAGTCATCCACTGTTTTCCCTTGTGTCTCGATTTGATCACAGAATAATCCAGCGTCCCCTGTTTCAGtttttCTTTGAAGCACAATCACCGAAACAAGCCTTCTTGGTGCCCCTGTTCCAGAGTCAAAACGAACGATGCCCTGTTCTCTGTAGTGCTTCTGGTATTCCACAATCCtttttGGCTGGAGTCTTTGAGGAAGAagagagAACGAGAAagagagagagagagagGAGAACATgagagagaACGTGAG
	M00842:287:000000000-BGGT4:1:1106:23243:5120	1	165	12	6	1	AG	CTCTCTCTCTCT	NA	1	1	8	29	132	GAAGGCCCTCTTCTTCCACGCGACGCGGACGTCGTGGGCTGCCGAAGGCCCGCAGATCCATCTCCCTCTCCctctctctctctGTGCGTGGctctctctCCCTCTCCCTCTTCCTTAGTCCCTCTCCCTCGG	GAAGGCCCTCTTCTTCCACG	CCGAGGGAGAGGGACTAAGG	51	29	94	20	225	20	60.392	60.468	4.94	2.69	0.860193	B	270	ACCGGTTTCGTTTGGAGCCCCTGTTTCACTCTACAGTAGAGCAAAACAAGGGGTGGAGCCCCtttttttATTTCAGAGCCTTTAAGTGAAGTCGAAGGCCCTCTTCTTCCACGCGACGCGGACGTCGTGGGCTGCCGAAGGCCCGCAGATCCATCTCCCTCTCCctctctctctctGTGCGTGGctctctctCCCTCTCCCTCTTCCTTAGTCCCTCTCCCTCGGCATCTCCCTTGGCAtctctctctcCctctctctctctctctctct
	M00842:287:000000000-BGGT4:1:1106:23507:4448	1	72	16	8	1	AG	GAGAGAGAGAGAGAGA	NA	1	1	3	41	197	ACTCAGATGATCTAAGAGCTCAATAAATGTACGGCCGAGTTGATCTGCAGGTGATGTGGCTAGCCgagagagagagagagaGTCGGCATGAAAATTCTCTGGTCTGGAGACGTGAGAAATCTCGAAGAAACCAAATGTAGGGGTTAGGTTCTTCACCATTTGAAGATACAAAATCATAGTTGCATCTTTAGTGTCGA	ACTCAGATGATCTAAGAGCTCAAT	TCGACACTAAAGATGCAACTATGA	41	92	7	24	203	24	57.018	58.039	2.57	2.15	12.9434	A	263	ATTGATACTCAGATGATCTAAGAGCTCAATAAATGTACGGCCGAGTTGATCTGCAGGTGATGTGGCTAGCCgagagagagagagagaGTCGGCATGAAAATTCTCTGGTCTGGAGACGTGAGAAATCTCGAAGAAACCAAATGTAGGGGTTAGGTTCTTCACCATTTGAAGATACAAAATCATAGTTGCATCTTTAGTGTCGAATTcccccTTGACTTGCTCGACTACAAGCTGTGAGTCGAAGAACACCGCTCTTCCGATCT
	M00842:287:000000000-BGGT4:1:1106:2358:18668	1	37	12	6	1	AG	AGAGAGAGAGAG	NA	1	1	8	4	105	AagagagagAAAGAGCGGCGAGGAagagagagagagGGGAAGGAGCCGAATGATCGTTCGGCTTCCTTTTCTCCAAACAccccccccTCCACTCGCACTTCCTTC	AAGAGAGAGAAAGAGCGGCG	GAAGGAAGTGCGAGTGGAGG	4	49	13	20	117	20	59.828	60.39	6.46	4.3	0.562824	F	249	GGTGAACGGGAAAagagagagAAAGAGCGGCGAGGAagagagagagagGGGAAGGAGCCGAATGATCGTTCGGCTTCCTTTTCTCCAAACAccccccccTCCACTCGCACTTCCTTCATGACTCCTGAGGCTTTGCgtgtgtCCCAGAATCTTCTGGGACGCCCCACAAAGCATCCCTATGTCAGGTTGCTCTGGGTCACGCTCGTGCTGAGCCGGGCTTCGTGGGCTAGCCATGTGAGAACAGGGCCC
	M00842:287:000000000-BGGT4:1:1106:24038:7698	1	379	33	11	1	AAG	AAGAAGAAGAAGAAGAAGAAGAAGAAGAAGAAG	NA	1	1	4	7	279	GTGACTGCTGCTCAAGGACTAAGGCCCTACTTCCAATCCCATCCCATTCGAGTCCTAACAGACCAATCTAACAACAAAGAGAAAATGATTTATCCACTGCATATACAAAACAGAGATTAATAATCCACtatataTGATAGTAAATTTCATATTTAGATTTAATTTTCAGTCTCAAGCTGTTAACATAATGTATCTGTAGATTGCTTCTTTCTGTATTaagaagaagaagaagaagaagaagaagaagaagAAAATTAAGATGTGAACATGAGGTGGAAC	GTGACTGCTGCTCAAGGACT	GTTCCACCTCATGTTCACATCT	197	7	162	20	440	22	59.965	58.321	3.85	2.9	3.714	B	440	GAGAAGCTTTATATTTATACTTATCTACCTCTCCCAAAGCCGTCAGCTCTGTCCTGGTTCAGGAGGAAACTAAACAACAGAGATCAGTCTATTATGCCAGTCGACTCCTCCAAGATGCTCAAACCCGGTACTCCTAGACCGAGAAGATGGTCTTTGCCTTAGTGACTGCTGCTCAAGGACTAAGGCCCTACTTCCAATCCCATCCCATTCGAGTCCTAACAGACCAATCTAACAACAAAGAGAAAATGATTTATCCACTGCATATACAAAACAGAGATTAATAATCCACtatataTGATAGTAAATTTCATATTTAGATTTAATTTTCAGTCTCAAGCTGTTAACATAATGTATCTGTAGATTGCTTCTTTCTGTATTaagaagaagaagaagaagaag…
	M00842:287:000000000-BGGT4:1:1106:24363:8459	1	106	30	15	1	AT	ATATATATATATATATATATATATATATAT	NA	1	1	4	64	199	GAAATGAGCGTCATGAGGGCCATTATTTGTCAAATGGTCTGAAACTAATGGCATTACAATGCACGTTGCTGTTTATCGAATAAAatatatatatatatatatatatatatatatTTCTAATAATATAAATATTTAAATATTTAAATCGaaaaaTGTTCCTTAATTTGATGAACAATGTCACAGCGATCATGGAACAGCA	GAAATGAGCGTCATGAGGGC	TGCTGTTCCATGATCGCTGT	64	65	22	20	220	20	59.34	60.036	5.19	4.4	0.696062	F	278	GAACACGTTCATGCACATAAAGAAATGAGCGTCATGAGGGCCATTATTTGTCAAATGGTCTGAAACTAATGGCATTACAATGCACGTTGCTGTTTATCGAATAAAatatatatatatatatatatatatatatatTTCTAATAATATAAATATTTAAATATTTAAATCGaaaaaTGTTCCTTAATTTGATGAACAATGTCACAGCGATCATGGAACAGCATCTAGATAACGATCATAAGAAAGAGAATCATTCTGAAACCGCCATCTAATGTTATAAA
	M00842:287:000000000-BGGT4:1:1106:24386:22023	1	171	16	5	1.5	AG	CTCTCTCTCTACACAC	NA	1	1	4	101	298	GCTCCTTAGTACTACCTTGAAACTTATTGTAGGCTCCCTTTTGCTTGGTAGCTATACCACTCAATGCCTTAGACATTTCTAACAAGACCACAACAtttttGTATGGGCTCTTGCAGCAACTAGTGCTCCACCTGACATAGTCTCCTTAGAGCCATGCctctctctctacacacTCTGCTCCACTTAGCTCTGTGCAACCCTGGCACTGGTGCTGGGATATTGCTTCTCCCCTTGCACCCCTTTGCTCTGAACTCGTGCTGAAACTCCTTTTAGTTGTGAAACTACCTTTGCTTAGTGC	GCTCCTTAGTACTACCTTGAAACT	GCACTAAGCAAAGGTAGTTTCACA	133	101	14	24	311	24	57.716	59.725	2.66	3.58	10.5585	F	315	AAGAACTTTGTTTGCTCCTTAGTACTACCTTGAAACTTATTGTAGGCTCCCTTTTGCTTGGTAGCTATACCACTCAATGCCTTAGACATTTCTAACAAGACCACAACAtttttGTATGGGCTCTTGCAGCAACTAGTGCTCCACCTGACATAGTCTCCTTAGAGCCATGCctctctctctacacacTCTGCTCCACTTAGCTCTGTGCAACCCTGGCACTGGTGCTGGGATATTGCTTCTCCCCTTGCACCCCTTTGCTCTGAACTCGTGCTGAAACTCCTTTTAGTTGTGAAACTACCTTTGCTTAGTGCTCCA
	M00842:287:000000000-BGGT4:1:1106:24664:17548	1	275	25	5	1.5	AG	TGTGTGGAGAGAGAGAAAGAGAGAG	NA	1	1	4	35	168	AGATCCATTGCTCTTCGGGAATCACAAAATCTAATCAACATAATTAATCTAATTATCTATCTTTATTTAAAGGATAATCAAAAGATTAAtgtgtggagagagagaAagagagagGATTTGGTCTTATCTTGGCTTGAGCCCGACCATGGGCCACCTTGCACCATTGTC	AGATCCATTGCTCTTCGGGA	GACAATGGTGCAAGGTGGC	69	35	186	20	353	19	58.5	59.71	5.14	5.01	2.79048	B	353	AGTATAATAATTAATTTATAATCACCTGTATCAATAATAAATGAAATCACAATATAATATTTAATTTTAAGAGTATCAatatatAATTCAAAATTTTGCATGAATTACAGTTAGGGATTAAGGTAACTTACTATTCCGCTTTGAGATTCATGCAACAGTGATATTGGTTAACGGACTTGAtttttAGATCCATTGCTCTTCGGGAATCACAAAATCTAATCAACATAATTAATCTAATTATCTATCTTTATTTAAAGGATAATCAAAAGATTAAtgtgtggagagagagaAagagagagGATTTGGTCTTATCTTGGCTTGAGCCCGACCATGGGCCACCTTGCACCATTGTC
	M00842:287:000000000-BGGT4:1:1106:24939:11803	1	222	10	5	1	AG	AGAGAGAGAG	NA	1	1	8	25	108	TCCATCGGATTGCACGTCAAATAGCATGTGGGCTGTGTCAGAGATAAGGTGAAagagagagagATGACGAGGAGTCATGGAGgagagaTGGTGGAGAGTTGTGGAGGA	TCCATCGGATTGCACGTCAA	TCCTCCACAACTCTCCACCA	33	25	169	20	276	20	60.037	60.105	3.18	4.17	0.142053	B	289	AGATCGGAAGAGCTTATGGCAATATGATTAGGTACTGGTTTGATAGGTGGAGGGCTCGAGGTGCTCTAACTTCGACAAAGCCTCATTCCTCttttttAGTGAGAATGCTGGAAAAGGGCTCAATAAttttttAGAGCCTTTCTTTTAGTACCATTTTGCTATGGTGCTTCCATCGGATTGCACGTCAAATAGCATGTGGGCTGTGTCAGAGATAAGGTGAAagagagagagATGACGAGGAGTCATGGAGgagagaTGGTGGAGAGTTGTGGAGGAAAGATACTGGAGA
	M00842:287:000000000-BGGT4:1:1106:25060:7978	1	275	12	6	1	AC	TGTGTGTGTGTG	NA	1	1	4	65	196	AATGGAGAGGCCCTGACCAGCCTTGAGGGACACatagaatagaatagaGGGAGGAAAATGGGAAAGGAATATTGTaaaaaaaGAAAGGAACATTATATtgtgtgtgtgtgTATACATGGTTTTGTATTATCCCAAGTGCCTGTGGATGTGCACAGATAAGATAGTGACCTGGTCATGTGGACCGTGATAGTTAGCA	AATGGAGAGGCCCTGACCAG	TGCTAACTATCACGGTCCACA	78	65	177	20	372	21	61.278	58.827	4	4.17	3.45026	F	431	CTTCGATTCTATATTCATAACATATGTTATATtatataTTGTGAATTATTTTAAAACTTGATATCTATGCCTGATCTAGTAGAGATGTACAGGTTTGCTTACTGAGTAATATTACTCATTATTTTCTTCCTTATAtttttCTGTCCTATAGGTGATTGGTCCCTAGATTTCCTGAAAATGGAGAGGCCCTGACCAGCCTTGAGGGACACatagaatagaatagaGGGAGGAAAATGGGAAAGGAATATTGTaaaaaaaGAAAGGAACATTATATtgtgtgtgtgtgTATACATGGTTTTGTATTATCCCAAGTGCCTGTGGATGTGCACAGATAAGATAGTGACCTGGTCATGTGGACCGTGATAGTTAGCATTAtttttGTCTTGAATGAATTtatat…
	M00842:287:000000000-BGGT4:1:1106:25179:12638	1	155	32	9	1.5	AC	CACACACACACACACACACTCTCTCTCTCTCT	NA	1	1	6	50	225	GGGCTACATACGGTGCAAGTGCAAGAGCCATCGGATGACGGCAAGgtgtgtGACAAgggggATGGGAAAAGAGATAAACAGAAGAAagagagagTCGAGctctctctcctcctcctCTTATAGcacacacacacacacacactctctctctctctCGAATGACTGCTCACAAGCCCTTATCTCTTTGTGTTAGCCCTCATTTCCCTCCACCACATCATCCCTCCT	GGGCTACATACGGTGCAAGT	AGGAGGGATGATGTGGTGGA	103	50	32	20	256	20	60.108	59.955	3.16	4.02	0.15255	F	256	GAtttttGCCCCTCACATCCCATCGCAATCGGGGCTACATACGGTGCAAGTGCAAGAGCCATCGGATGACGGCAAGgtgtgtGACAAgggggATGGGAAAAGAGATAAACAGAAGAAagagagagTCGAGctctctctcctcctcctCTTATAGcacacacacacacacacactctctctctctctCGAATGACTGCTCACAAGCCCTTATCTCTTTGTGTTAGCCCTCATTTCCCTCCACCACATCATCCCTCCT
	M00842:287:000000000-BGGT4:1:1106:25199:21092	1	171	10	5	1	AT	TATATATATA	NA	1	1	4	4	125	ccAACTACCACTGGCGATCATCCGtatatatataGTAGTTATGTTTTGCCCTCTGGAGGCAATCCAATCATCACACTAGACATGCATCATATGGAATCACATCATCACATGGAGCAGTCCTCAAC	CCAACTACCACTGGCGATCA	GTTGAGGACTGCTCCATGTGA	4	70	147	20	271	21	59.751	59.998	2.92	3.58	1.25155	F	302	CACATAGGGACTATCTcccccTCTCAAAGGTAATATTATCCTAATAAAACTAACTCCTGACCTACCACGATAGTTATCTACATATGTATAGTAGAcccccACACTCAAAGGTGAGCCCTATTGGTAGCATCATTCCTGTGGAAcccccAACTACCACTGGCGATCATCCGtatatatataGTAGTTATGTTTTGCCCTCTGGAGGCAATCCAATCATCACACTAGACATGCATCATATGGAATCACATCATCACATGGAGCAGTCCTCAACATATGGCATCACACGAGacacacATCGTGTG
	M00842:287:000000000-BGGT4:1:1106:25244:9002	1	314	10	5	1	AC	GTGTGTGTGT	NA	1	1	2	3	93	CCAACCAGCTGTGCAAGAAAATCagagagagTGTTTTaaaaaCAAAGACTGGAGCATCTGgtgtgtgtgtGATGGGTGAAAGGAGTCCCAAGA	CCAACCAGCTGTGCAAGAAA	TCTTGGGACTCCTTTCACCC	40	3	254	20	346	20	59.254	58.935	2.52	4.61	1.81089	F	367	CACTTGGAGTCCGGCATAAGATGAAGGGAGCTAGCACACTCTCGGTATGCCCTGTAGAAGGCTGGCACGCACGCCTGGAGaaaaaaaTGCTGGCACAAAATAGAGGAGTGTGGCACGCCCGGCACGCTGAAACaaaaaGGAAAACATGTTGAAAATGCACTGTCTAGAGCTGTCActgctgctgGCAAGCGCATGGTGGCCAACTGGGGTAGGCACTATTACTGAGTAGAGTTTGTTAAGGACAAgtgtgtGGCCAACCAGCTGTGCAAGAAAATCagagagagTGTTTTaaaaaCAAAGACTGGAGCATCTGgtgtgtgtgtGATGGGTGAAAGGAGTCCCAAGAATTTCTATGAGTAACAGTGAG
	M00842:287:000000000-BGGT4:1:1106:25828:6053	1	67	31	7	1.5	AG	TCTCTCTCTCTCTCACACACGCACACACACA	NA	1	1	3	31	179	ACGAAGCCCAACAACGGTGGCTGCTGGGGCATTGGGAATATGGTATTGCTtctctctctctctcacacacGcacacacacaAGCAGtttttAATGTATAGATTTCTACGACCGCATATCCAtttttATGCTTAGGCAACTACTTGCAATAGCTTAAGCAGGAGCTGTACTGCTGTGCAT	ACGAAGCCCAACAACGGTG	ATGCACAGCAGTACAGCTCC	31	78	17	19	195	20	61.184	60.392	4.94	4.7	2.57636	F	254	atatatatatatatGGACGAAGCCCAACAACGGTGGCTGCTGGGGCATTGGGAATATGGTATTGCTtctctctctctctcacacacGcacacacacaAGCAGtttttAATGTATAGATTTCTACGACCGCATATCCAtttttATGCTTAGGCAACTACTTGCAATAGCTTAAGCAGGAGCTGTACTGCTGTGCATTATTTGCTCAACATCCAGTAATTCCCAAATATCATTAAATCATAATAACATATCAACAT
	M00842:287:000000000-BGGT4:1:1106:26308:17335	1	94	10	5	1	AG	CTCTCTCTCT	NA	1	1	4	73	241	CTAACAGGCCAAGCAAGCTTAAACCAAGCTAAGGCCATGACCCTCTCATCCCATAAACCGGTcacacacaTCCAAATCTATCTTCCTCACTCActctctctctGTTTTACTGCTGTGGCCAGTTCCACTGACTTGAGCATTGGAGGATCTTCGATGGAAAACCATTTCCGGTTGAAAACtttttGCAGGTTGAAGCTCCAGCACCTGGAAAATAGAAGCAGACACCATATTTGACCAGCCA	CTAACAGGCCAAGCAAGCTT	TGGCTGGTCAAATATGGTGTCT	73	116	1	20	241	22	58.749	59.691	3.74	3.41	3.55982	F	242	CTAACAGGCCAAGCAAGCTTAAACCAAGCTAAGGCCATGACCCTCTCATCCCATAAACCGGTcacacacaTCCAAATCTATCTTCCTCACTCActctctctctGTTTTACTGCTGTGGCCAGTTCCACTGACTTGAGCATTGGAGGATCTTCGATGGAAAACCATTTCCGGTTGAAAACtttttGCAGGTTGAAGCTCCAGCACCTGGAAAATAGAAGCAGACACCATATTTGACCAGCCAC
	M00842:287:000000000-BGGT4:1:1106:27042:21682	1	196	14	7	1	AG	GAGAGAGAGAGAGA	NA	1	1	2	15	240	ATCGGAATCTAAGGGTGAAGGCGGGGAAAATTGGCCaaaaaaCAGCCCaaaaaTGAAGCCAAGCAACGGATTATTATACTTAGATCCCAACCCACTTGCCGATAGTTGGGATCTGACTCTAGCCTTAGGCCGATGTAGGGAAGAGTCCATAGCCACAAAGAAGAAAAGAGGATgagagaGCTTGGGCTTgagagagagagagaGGGAAGTTTgagagaGGACATAATGGCTGGAAGTGGA	ATCGGAATCTAAGGGTGAAGGC	TCCACTTCCAGCCATTATGTCC	167	15	7	22	246	22	59.895	60.092	4.35	4.02	4.19739	F	249	CGGTAGATCGGAATCTAAGGGTGAAGGCGGGGAAAATTGGCCaaaaaaCAGCCCaaaaaTGAAGCCAAGCAACGGATTATTATACTTAGATCCCAACCCACTTGCCGATAGTTGGGATCTGACTCTAGCCTTAGGCCGATGTAGGGAAGAGTCCATAGCCACAAAGAAGAAAAGAGGATgagagaGCTTGGGCTTgagagagagagagaGGGAAGTTTgagagaGGACATAATGGCTGGAAGTGGAAGA
	M00842:287:000000000-BGGT4:1:1106:27525:15116	1	99	10	5	1	AC	CACACACACA	NA	1	1	3	77	211	GGTCCTTGCACTCCTTACTCCAACAAAAGATAGAACCTTGAGGATATACATAGATAGCTACACAATAAATAAAATAACTGTGAAGTACTGATTAGGACcacacacacaCCACAACAAAAGAAAATTTGTATtatataATACTAAACTGGTACACTGGTTTGTACTGCTACCATACTAAGCCGAACCATACTGATGGGCCACTAGTACCAGA	GGTCCTTGCACTCCTTACTCC	TCTGGTACTAGTGGCCCATCA	77	82	1	21	211	21	60.066	59.992	3.85	3.07	2.07391	B	272	GGTCCTTGCACTCCTTACTCCAACAAAAGATAGAACCTTGAGGATATACATAGATAGCTACACAATAAATAAAATAACTGTGAAGTACTGATTAGGACcacacacacaCCACAACAAAAGAAAATTTGTATtatataATACTAAACTGGTACACTGGTTTGTACTGCTACCATACTAAGCCGAACCATACTGATGGGCCACTAGTACCAGAACAGAAAACCTTGATTAGGACCATCAAGCAAATGGTGAAAATATAAATTATTGCTAATTAC
	M00842:287:000000000-BGGT4:1:1106:4013:20611	1	229	12	6	1	AG	TCTCTCTCTCTC	NA	1	1	2	78	297	GGGAAGTGCTCGGCTATTGTGAGCCAAGCCGAGGCATCCCAGAGCATGCTAGCCCTATTCTTGGTCTCTAGCGCCACCCCGGTGGCAACAGCAACTACTGGAGGCAAGTGCTGGCTTGCAACCGGTGTGAGGTAGGAGGGGAGACGAGGGAGAGGCTcccccTCTCACACTCATGCCTCACCAGCATtctctctctctcCCTTCCCtcttcttctTGCATGTCaaaaaCCATGCGTAAGAAAGAGGAAAGGTGGGCCTTAGTTAGTAGTGGGCCTTGAGCCAGCCAACTGCAGATAG	GGGAAGTGCTCGGCTATTGT	CTATCTGCAGTTGGCTGGCT	167	78	42	20	338	20	60.108	60.107	2.71	4.75	0.214967	F	355	AAGTATGACaaaaaaaaaGaaaaaaaGaaaaaGAGGAAAGAGGGAAGTGCTCGGCTATTGTGAGCCAAGCCGAGGCATCCCAGAGCATGCTAGCCCTATTCTTGGTCTCTAGCGCCACCCCGGTGGCAACAGCAACTACTGGAGGCAAGTGCTGGCTTGCAACCGGTGTGAGGTAGGAGGGGAGACGAGGGAGAGGCTcccccTCTCACACTCATGCCTCACCAGCATtctctctctctcCCTTCCCtcttcttctTGCATGTCaaaaaCCATGCGTAAGAAAGAGGAAAGGTGGGCCTTAGTTAGTAGTGGGCCTTGAGCCAGCCAACTGCAGATAGAGGAGGGAGCCCAGAGA
	M00842:287:000000000-BGGT4:1:1106:4032:17381	1	161	10	5	1	AG	CTCTCTCTCT	NA	1	1	1	4	192	ACAACTGAATGATTGGCTTAGAGATAGTTCCAaggaggaggAAAGGATTCTTACCTTCTAGGCAGCTGAGAAGGCAATCTCTGCACTCTCCAATGATGATTTGGTAATCTTCCTCTAGCAAAACTCAAAGGATGATCGGCAATTTGAGATCTCCCCctctctctctTTCTCTTGATGTGGGTGACTATAggg	ACAACTGAATGATTGGCTTAGAGA	CCCTATAGTCACCCACATCAAG	132	4	5	24	196	22	58.191	57.657	3.1	3.02	10.1519	F	203	AATAACAACTGAATGATTGGCTTAGAGATAGTTCCAaggaggaggAAAGGATTCTTACCTTCTAGGCAGCTGAGAAGGCAATCTCTGCACTCTCCAATGATGATTTGGTAATCTTCCTCTAGCAAAACTCAAAGGATGATCGGCAATTTGAGATCTCCCCctctctctctTTCTCTTGATGTGGGTGACTATAgggggTGGAA
	M00842:287:000000000-BGGT4:1:1106:5123:22598	1	111	22	11	1	AG	CTCTCTCTCTCTCTCTCTCTCT	NA	1	1	4	53	275	TGCTAACTGTAGATCGGCCAAACATAACATAGCAGTCAAAGAAAGGGTTGAGTTtctctcTTTGCAAATGGCGctctctctctctctctctctctAATATCATGAGATGAGtttttCTTCCttttttttCCAGGAGGCAGCTTCAGTTGTAGCtttttACTAAACTAGTTTTCCCTCATGAAGGATTATATTTACATTTATAATCAATCACTTGTCAAAATCAATTAGCAACTTGTTGTggggggATCTTTAGTCCCACATGGGTTGCACGGTaa	TGCTAACTGTAGATCGGCCA	TTACCGTGCAACCCATGTGG	53	160	38	20	312	20	58.519	60.891	5.36	4.17	2.37224	F	361	aaaaaCAAAACTATTTACAGGGAGGCTAAACACAAAATGCTAACTGTAGATCGGCCAAACATAACATAGCAGTCAAAGAAAGGGTTGAGTTtctctcTTTGCAAATGGCGctctctctctctctctctctctAATATCATGAGATGAGtttttCTTCCttttttttCCAGGAGGCAGCTTCAGTTGTAGCtttttACTAAACTAGTTTTCCCTCATGAAGGATTATATTTACATTTATAATCAATCACTTGTCAAAATCAATTAGCAACTTGTTGTggggggATCTTTAGTCCCACATGGGTTGCACGGTaaaaaaTCCAGCGCCTTAAATAGGAAAGGTTCTCACCTCTTTCTCAAGAGG
	M00842:287:000000000-BGGT4:1:1106:5384:23635	1	97	12	6	1	AG	AGAGAGAGAGAG	NA	1	1	4	25	160	TTCTCATTGGACCTTCGCCGTCTGGCCTAAGAATTAAAACaaaaaagagagagagagAATAATAAGTATAATGGTCGGGAACCTTACCTTGACTCAGCATTATCAGTGCTCGTCAACATCTACAGTGGCATTCATCTGTAGATCAATGACCCAGGTAGGC	TTCTCATTGGACCTTCGCCG	GCCTACCTGGGTCATTGATCT	25	82	52	20	211	21	60.391	59.229	6.46	2.75	2.16239	F	437	GCTACTATCGTGAGACATCCTCTTGACTGATTAGGGCTTTTCTTCCCTTCTTTCTCATTGGACCTTCGCCGTCTGGCCTAAGAATTAAAACaaaaaagagagagagagAATAATAAGTATAATGGTCGGGAACCTTACCTTGACTCAGCATTATCAGTGCTCGTCAACATCTACAGTGGCATTCATCTGTAGATCAATGACCCAGGTAGGCTTATGCTACTGAAAGAGGAGGgagagagaGGATgggggagagagGgagagagagaAGGTAGTCAGTCGAAAGAAtttttCTCTTTCTTTCCACTCGGCTTTCCCCATTTTCCACCACCTcacacaTCCCCTAACACAATTCACAGGCATCCTAGAAGCTTTTGCGTGCTTTGCAAATTCTCCCTGTGC…
	M00842:287:000000000-BGGT4:1:1106:6234:5269	1	67	10	5	1	AC	CACACACACA	NA	1	1	4	21	109	ACAGCTTGCATATGAGACTCCTTAGGATTAGACTGATACCTAGcacacacacaTATACTAAATATTTTGTCTGGTCTACTAGCAATAAGGTAGAGTAGGGATTCGATCA	ACAGCTTGCATATGAGACTCCT	TGATCGAATCCCTACTCTACCT	21	34	24	22	132	22	59.229	57.274	3.69	3.08	7.49684	A	277	ATAAATATTTaaaaaTTCTTTTGACAGCTTGCATATGAGACTCCTTAGGATTAGACTGATACCTAGcacacacacaTATACTAAATATTTTGTCTGGTCTACTAGCAATAAGGTAGAGTAGGGATTCGATCATACCTCTATAAAGCTTTTGATTAGTGCTCTTACAtttttCATCTTTGTCAAGCTTACATGTTGAGCTCATGGGCGTAACAATTCCTTTGGAACTCTTCATCCCAAATCTTTTAAGCATTTCTCTTGTATATTTTACTTAGTTGAT
	M00842:287:000000000-BGGT4:1:1106:6247:23395	1	188	12	6	1	AT	TATATATATATA	NA	1	1	6	61	227	GAGACATGACAGCTTTGACACTACTGATGTTCTTGAAGTAAAGAGGCatatatGGTTAGCTTCTTAGCTACCAACACAAGATTGATATTTACAGGAATTGTGAAGAAAGAATTCCATCTAGAAAATGAATACTCtatatatatataaaaaaGAGACACCACaaaaaTCCATAGGAAAGTaaaaaGAGACTTTACACAACAAATAAAAGGTCCAAATCCACCAACACG	GAGACATGACAGCTTTGACACT	CGTGTTGGTGGATTTGGACC	112	61	54	22	280	20	58.603	59.404	3.55	4.46	3.99356	F	468	AGATCGGAAGAGCCTCAGATCATCTTGAACTCAGGTGAACGATAGATTGAGTAGAGACATGACAGCTTTGACACTACTGATGTTCTTGAAGTAAAGAGGCatatatGGTTAGCTTCTTAGCTACCAACACAAGATTGATATTTACAGGAATTGTGAAGAAAGAATTCCATCTAGAAAATGAATACTCtatatatatataaaaaaGAGACACCACaaaaaTCCATAGGAAAGTaaaaaGAGACTTTACACAACAAATAAAAGGTCCAAATCCACCAACACGAGATAGTTACTGCTCTCACAAAAGAACAAAAGAACAAAAGAAAATGTTGGAAAACAACAGTTACTGCTCTCACAAAAGAACAAAACCAGCAAGAAATTGCTTACTTTCTAGCATCTGAA…
	M00842:287:000000000-BGGT4:1:1106:6392:17954	1	216	10	5	1	AT	TATATATATA	NA	1	1	13	31	225	TGTCTCTTCCTTAATATCTTCTCCCCttttttGTATTAATATTTTCTCtttttGAGtatatatataTTGATATCTTCTCTTCTAATATCttttttCTTCAAGTATATTTCTCTTGATATCTTCTCTTAAACATGTTTCTCTTTCTCTTGATATCTTCTCCTAAATATGTTTAttttttttttGATATCTTTTcccccATTTTGTCATTAGCAGAAAGGATGAAAG	TGTCTCTTCCTTAATATCTTCTCCC	CTTTCATCCTTTCTGCTAATGACA	31	135	160	25	384	24	57.395	57.252	4.3	3.58	14.353	F	466	TAGTTTGAGTTTTCTATGTAtttttttAAatatatTTTACATCTCCCTCTTTATGTATGTTTAGTTTAGAATTTCTCTTAATGTCTTCGTCTAATAACTTGCCTTTTAAATTTAAATGTCTTCTTCCTTAAGTATGTTGTTCTAAGATTTTCTTAAGATTGTCTCTTCCTTAATATCTTCTCCCCttttttGTATTAATATTTTCTCtttttGAGtatatatataTTGATATCTTCTCTTCTAATATCttttttCTTCAAGTATATTTCTCTTGATATCTTCTCTTAAACATGTTTCTCTTTCTCTTGATATCTTCTCCTAAATATGTTTAttttttttttGATATCTTTTcccccATTTTGTCATTAGCAGAAAGGATGAAAGTAAATTTTCTAAGAA…
	M00842:287:000000000-BGGT4:1:1106:6420:13896	1	193	18	9	1	AG	TCTCTCTCTCTCTCTCTC	NA	1	1	3	19	212	GCTCCTAACAAACTTTGGCTGTATTTtatataAAGGACCTTATGCCATCATCTCTAGAtaagctaagctaagcCAGACTAAGCTAAACTAAGTCAAGTCAAGATAAGTTCAAACTAGTTTGCttttttATAGAAACTTTAAATTTTGACACTCAtctctctctctctctctcTTCTCTTTTATTGTTGTTCCCCATCTTGCTAACTTGACCA	GCTCCTAACAAACTTTGGCTGT	TGGTCAAGTTAGCAAGATGGG	132	19	39	22	250	21	59.377	57.928	4.4	4	5.69529	F	260	CGGTAGATCGGAAATAATAGAAAAGATTCTTCAGCTATGCTCCTAACAAACTTTGGCTGTATTTtatataAAGGACCTTATGCCATCATCTCTAGAtaagctaagctaagcCAGACTAAGCTAAACTAAGTCAAGTCAAGATAAGTTCAAACTAGTTTGCttttttATAGAAACTTTAAATTTTGACACTCAtctctctctctctctctcTTCTCTTTTATTGTTGTTCCCCATCTTGCTAACTTGACCATTagagagTC
	M00842:287:000000000-BGGT4:1:1106:6716:7420	1	27	18	6	1	AGG	CTCCTCCTCCTCCTCCTC	NA	1	1	15	1	91	CCTCCACCTCCTTCTTCATCCTctcctcctcctcctcctcCATCATCCTcccccTTCATCGTCCTCCCTCCTCCATCGTCCACCCTATCCA	CCTCCACCTCCTTCTTCATCC	TGGATAGGGTGGACGATGGA	1	31	5	21	95	20	59.512	59.737	3.51	3.41	1.75186	F	461	CTATCCTCCACCTCCTTCTTCATCCTctcctcctcctcctcctcCATCATCCTcccccTTCATCGTCCTCCCTCCTCCATCGTCCACCCTATCCAtcctcctccATTGTCCTCCCCATCCATCCAtcctcctcctcctccATCATCCTACTCCAtcctcctcctcttcttctTCCTCATCCCTCTCCCCtttttCCCAtttttCCTTCCACATTCCATAtttttttAAATTaaaaaaaTTAAGGAAGTCCAAGACACAGACCAAAGCCTAAAGCATGAGTAAGTATTAGGTTTAGGCTTGGGAAATAGGCCTCAAGGCCAAAACAAATGAAGCCCAAGCTTGATTAATTTTACTTAGAGTCATTCTTTGTGCACCACGCGCAGTGTAGAAACcacacaC…
	M00842:287:000000000-BGGT4:1:1106:6760:12238	1	45	25	6	2	AG	GAGAGAGAGAGAGCCAGAGAGAGAG	NA	1	1	4	1	150	AGATTTCAAAGAGGATGTGCATGAGgagagagagagaGCCagagagagagGGTGCTGAGAAATAGAAGAAAGGTTCTTTTGTCCTAACTTGGGGCATGCAGttttttgggggTCTGAGAAGTGTAACCTAGCAATATAGAAAGAAGGGAG	AGATTTCAAAGAGGATGTGCATGA	CTCCCTTCTTTCTATATTGCTAGGT	1	75	20	24	169	25	58.741	57.69	3.07	3.08	12.5686	G	171	GaagaaagaaagaGAATCTAGATTTCAAAGAGGATGTGCATGAGgagagagagagaGCCagagagagagGGTGCTGAGAAATAGAAGAAAGGTTCTTTTGTCCTAACTTGGGGCATGCAGttttttgggggTCTGAGAAGTGTAACCTAGCAATATAGAAAGAAGGGAGAG
	M00842:287:000000000-BGGT4:1:1106:7371:19643	1	192	12	6	1	AC	CACACACACACA	NA	1	1	4	96	279	CCGCAGCATCCAAGTTTGAGTCCCCACTCTTGCATACAAGaaaaaaaTTCTATCGCCGTCCAATCATGCACTAGAGGCAATCTCGACTACTGATTCCCACACCAGAAGCAACACCCTCTAGGTGAGTGATCTGGGTTTGAGTCCCCACTCCcacacacacacaaaaaaaaaCATATTGCCAGCAATTGGATCATCAGATGCAGCCTTTCTCAAccatccatccatGCACCAAAGGTGATCCTGACCATTTGTCAATGCTTAGGAGGAAGCTGCCCAGAT	CCGCAGCATCCAAGTTTGAG	ATCTGGGCAGCTTCCTCCTA	131	96	41	20	319	20	59.83	60.031	3.02	2.94	0.200378	F	328	aaaaaCATATCCTGGCCATCGGTCAGGGCACAAAGGTAAGCCGCAGCATCCAAGTTTGAGTCCCCACTCTTGCATACAAGaaaaaaaTTCTATCGCCGTCCAATCATGCACTAGAGGCAATCTCGACTACTGATTCCCACACCAGAAGCAACACCCTCTAGGTGAGTGATCTGGGTTTGAGTCCCCACTCCcacacacacacaaaaaaaaaCATATTGCCAGCAATTGGATCATCAGATGCAGCCTTTCTCAAccatccatccatGCACCAAAGGTGATCCTGACCATTTGTCAATGCTTAGGAGGAAGCTGCCCAGATGCAGTATGC
	M00842:287:000000000-BGGT4:1:1106:8140:23608	1	264	10	5	1	AG	AGAGAGAGAG	NA	1	1	7	69	205	ATGTAACCCAAGCCTCTCCCCTAAGGGCTATAAAACCATCCCTAGACACCTTGAGGTGGAGATATAGAGGATTCCCATCCTCTTCCACCCTTCCAACTTAAGAGAAagagagagagCCAAGGGaaaaaGTTTTATTCGAGGTTCTTGGTTTTCttttttttttttttttCCTttcttcttcTTAACTCCAAGCCTTGTTCATGGC	ATGTAACCCAAGCCTCTCCC	GCCATGAACAAGGCTTGGAG	86	69	158	20	362	20	59.08	59.471	4.3	3.86	1.44909	F	367	ATCGCACGCGCCTGATCTTTACCCGATCGAACGGCTAACAATGAACCCGATCTCCACTTCTCTTGATTTGATGGTCTAGAAGCCCCTAAAGCATGATCCAATGGCTGGAAAAGCCCCAAAATCATTTTAACAACTCCTTTTATCCCATATGGGAAAGATGTAACCCAAGCCTCTCCCCTAAGGGCTATAAAACCATCCCTAGACACCTTGAGGTGGAGATATAGAGGATTCCCATCCTCTTCCACCCTTCCAACTTAAGAGAAagagagagagCCAAGGGaaaaaGTTTTATTCGAGGTTCTTGGTTTTCttttttttttttttttCCTttcttcttcTTAACTCCAAGCCTTGTTCATGGCTTAGG
	M00842:287:000000000-BGGT4:1:1106:9149:10575	1	118	15	5	1	AAG	AAGAAGAAGAAGAAG	NA	1	1	6	23	140	TCCACTTGCTGGATATGGTTCTGACAGTGACCCTCTGATAGTTAAGTTAGTGAAagagagCAACTATGGAGAAGTAATaagaagaagaagaagCTTAagagagTTCAAGATCCTTTCTTTCATTGTCATAAGGTCCCTTT	TCCACTTGCTGGATATGGTTCT	AAAGGGACCTTATGACAATGAAAG	56	23	40	22	179	24	59.154	57.159	3.01	2.62	9.68699	B	267	GATCCTTCCCCAAGCGATCTACGAGTACCTATaaaaaaGTCCACTTGCTGGATATGGTTCTGACAGTGACCCTCTGATAGTTAAGTTAGTGAAagagagCAACTATGGAGAAGTAATaagaagaagaagaagCTTAagagagTTCAAGATCCTTTCTTTCATTGTCATAAGGTCCCTTTTAGATAGAATATTCTAGAGATTGTTACATCGTTATTTATAATTTAGCCTAATGGAtctctcTATAACAATAGATTAATTGTGTCCATT
	M00842:287:000000000-BGGT4:1:1107:10177:5854	1	164	15	5	1	AAG	AAGAAGAAGAAGAAG	NA	1	1	2	1	90	GTCTACACTCCAACGCATAGGAAaagaagaagaagaagTAATTTCATTCATCAAAATCATCGGTCCTCCTATACATGGCTGGCCAAGAGG	GTCTACACTCCAACGCATAGGA	CCTCTTGGCCAGCCATGTAT	1	32	141	22	230	20	59.574	59.816	2.94	2.29	2.61048	A	234	gatgatgatGGCATGGCTAGGGTTTGGATGTTGGAGAATGATGGCATGTGGAATATGGTGGCATGAAGAATATGGGGCAATATCAGATATGTGTTGATAAGTGTGGATATGTGGGCCTCTCACCctctctctCACGGAGTGTCTACACTCCAACGCATAGGAAaagaagaagaagaagTAATTTCATTCATCAAAATCATCGGTCCTCCTATACATGGCTGGCCAAGAGGGTAT
	M00842:287:000000000-BGGT4:1:1107:11494:12873	1	265	10	5	1	AG	TCTCTCTCTC	NA	1	1	4	44	243	TCCCTCACATAGCCATCCCATGAAGACCAAGGTATTTTCCCATTGTTGCACTGTTCAAGATCCAAACCAAATGGTATAGCATGAAGAACGGACATGCATTGTTAAagagagCCTAATTTCTCTTGaaaaaaaaaaaaCCTAGTTGTCAtctctctcCCCTCTTAtctctctctcACGCCTTTTCCCTCTTTCCCTCATGCCCTCACATTGAAGGAGTTCCCTTCATGAAGAACATTAAATGCC	TCCCTCACATAGCCATCCCA	GGCATTTAATGTTCTTCATGAAGGG	144	44	101	20	343	25	60.03	58.955	4.37	3.95	6.07488	F	344	ATCCTATTTTAATTAGTGATGAATGAGGAACGAGTAtttttttCCTAAAATCCTAATTCCTCTATTCTtctctcTTCTCTTTtctctcCCTCATATTTTCTCCCTCACATAGCCATCCCATGAAGACCAAGGTATTTTCCCATTGTTGCACTGTTCAAGATCCAAACCAAATGGTATAGCATGAAGAACGGACATGCATTGTTAAagagagCCTAATTTCTCTTGaaaaaaaaaaaaCCTAGTTGTCAtctctctcCCCTCTTAtctctctctcACGCCTTTTCCCTCTTTCCCTCATGCCCTCACATTGAAGGAGTTCCCTTCATGAAGAACATTAAATGCCC
	M00842:287:000000000-BGGT4:1:1107:12248:9624	1	67	20	6	1.5	AG	TCTCTCTCTCTCTTTCTCTC	NA	1	1	6	40	192	TGAAGGCTCTTCTTTGACAAGATCTTTGAAAATCTAGTGAGATTTCAATCTTCCTCTCGGTTtctctctctctcTTtctctcATTGTGGGTGACCggaggaggaTGATCTCATCTTATAGAGGAGATCCTAGGGTGGTGTCGCTGCTTGACATGCCCTAAAtctctctcGTTGTGGGTGATCGGGAGTCTTC	TGAAGGCTCTTCTTTGACAAGA	GAAGACTCCCGATCACCCAC	40	90	5	22	196	20	57.578	59.824	3.02	4.61	4.59806	B	450	AGATTGAAGGCTCTTCTTTGACAAGATCTTTGAAAATCTAGTGAGATTTCAATCTTCCTCTCGGTTtctctctctctcTTtctctcATTGTGGGTGACCggaggaggaTGATCTCATCTTATAGAGGAGATCCTAGGGTGGTGTCGCTGCTTGACATGCCCTAAAtctctctcGTTGTGGGTGATCGGGAGTCTTCTTCGGTCTCCTATTTCCCACACGCAAGGTGCAGGTGGTTCAGGCTGGGCTGGCCTCAGTCTGGGCTGGCCCAAAGAAACTGGGCCTCACAAATACCCTCCATTTAATTTCTTGAGTTGCTCCTACATTACTTGTTGGCTTCTCCTAACTCCTAAAAGTTTACATGATTAATCATTATCCTAAGGTACTTAGCAAGATCATTAA…
	M00842:287:000000000-BGGT4:1:1107:12490:27995	1	96	18	6	1	AAG	GAAGAAGAAGAAGAAGAA	NA	1	1	4	3	141	GCTAATCCTTCCCTCCTTTATGTAGTTATGTAAATAATTTTCaaaaaTCTGGCTGGCtttttGCCTCCCTTACCCCTCAAACaaaaaaaaTGGAGgaagaagaagaagaagaaCAATCACAAGTTGTCAAGATCTCTATGT	GCTAATCCTTCCCTCCTTTATGTA	ACATAGAGATCTTGACAACTTGTGA	71	3	1	24	141	25	57.565	58.002	2.29	3.58	13.4329	F	274	GCTAATCCTTCCCTCCTTTATGTAGTTATGTAAATAATTTTCaaaaaTCTGGCTGGCtttttGCCTCCCTTACCCCTCAAACaaaaaaaaTGGAGgaagaagaagaagaagaaCAATCACAAGTTGTCAAGATCTCTATGTATTATAATTACCTCCCAACAACttttttAATCCTTTCCCCTCCTTCAAGTTCATTTCACAAAtttttATCCTGCTGCAACTAATTTTCGATATTTTGTGTTCTTTTAGCCATTTTCTtctctcTTGCTTCTCT
	M00842:287:000000000-BGGT4:1:1107:12529:6501	1	34	24	12	1	AG	CTCTCTCTCTCTCTCTCTCTCTCT	NA	1	1	3	3	133	AGTGCTAAGTTTAAAGTCTTCAGCCAAActctctctctctctctctctctctCCTTTTGATAGtttttATTAAGTTTTCTCCTaaaaaaTTGGGTTGCCTcccccATATTAAGCAAAGGTTCAACCAGTATCA	AGTGCTAAGTTTAAAGTCTTCAGCC	TGATACTGGTTGAACCTTTGCT	3	59	6	25	138	22	59.53	57.901	4.85	3.91	9.56935	F	141	CCAAAAGTGCTAAGTTTAAAGTCTTCAGCCAAActctctctctctctctctctctctCCTTTTGATAGtttttATTAAGTTTTCTCCTaaaaaaTTGGGTTGCCTcccccATATTAAGCAAAGGTTCAACCAGTATCATGA
	M00842:287:000000000-BGGT4:1:1107:13739:21671	1	267	15	5	1	AAG	TTCTTCTTCTTCTTC	NA	1	1	5	51	286	GCCCTCATTAGGCTTCTAGGCCTTTACAAGACCTTTAAGCCCCTGATGAACCTTAGAGCTATTTTagagagagaaaaaGGAAGGAGGGAGATGAtttttttctctctCCTATTTCTTTCTCttctttttctttttctttTCttttttttCTTTTCttttttttttCTTCtttttCtttttCCTTTTCtttttCTTCTTCTttcttcttcttcttcCTATTTCTTCTTTCTGCTATAGCTGAAATAGGGGAGAGGGTcccccccATTCATGACTAGCTTGGTGGCCC	GCCCTCATTAGGCTTCTAGGC	GGGCCACCAAGCTAGTCATG	179	51	67	21	352	20	60.271	60.749	3.93	3.07	2.02056	F	379	GTAGATCTTAGGGTAGTCTAGGGCCCACATACTGATATTTAGCTTAGTGGGTTGGTCAGTCTCTAGGCCCTCATTAGGCTTCTAGGCCTTTACAAGACCTTTAAGCCCCTGATGAACCTTAGAGCTATTTTagagagagaaaaaGGAAGGAGGGAGATGAtttttttctctctCCTATTTCTTTCTCttctttttctttttctttTCttttttttCTTTTCttttttttttCTTCtttttCtttttCCTTTTCtttttCTTCTTCTttcttcttcttcttcCTATTTCTTCTTTCTGCTATAGCTGAAATAGGGGAGAGGGTcccccccATTCATGACTAGCTTGGTGGCCCAGTGGCCATGCCTAGCAGTAATCGTGG
	M00842:287:000000000-BGGT4:1:1107:13819:19368	1	195	10	5	1	AT	ATATATATAT	NA	1	1	2	2	162	TGACTGCAAGTTGTGATGCCTAGTTATTTAAGGTACAAGGGTTTAACAAGACCAGGCAACTGAAGACCCTTTCATCCACTCTTTTCCTTCTATTCCTCTCCTTCATCTTGTCCATTCCTTTAACCatatatatatTTTCTTTCATTCTAAAGGCTTATTCCC	TGACTGCAAGTTGTGATGCC	GGGAATAAGCCTTTAGAATGAAAGA	105	2	70	20	231	25	59.046	57.118	4.4	2.52	8.8355	A	447	CCATGAGTGGCAGTATCTGTTACCAGGCTGACCAATAGTAGCCCAGACTATAAAAGCAATGTGTTCATTTGACTGCAAGTTGTGATGCCTAGTTATTTAAGGTACAAGGGTTTAACAAGACCAGGCAACTGAAGACCCTTTCATCCACTCTTTTCCTTCTATTCCTCTCCTTCATCTTGTCCATTCCTTTAACCatatatatatTTTCTTTCATTCTAAAGGCTTATTCCCTATATTTCTCCTATCTCAAACCTtctctcTGTAATCtttttAAAGGTGATATGACAGATGCCTTCTGCGTTATGTGTTGTTTTGCAACCTATTGAAATGGTGAAAGAAAGCTGGGAGTAGGTAAatatatTTACTCTAAGAACAATAGATTTGGATTTCACTGGATTT…
	M00842:287:000000000-BGGT4:1:1107:14574:5791	1	237	20	10	1	AG	TCTCTCTCTCTCTCTCTCTC	NA	1	1	10	4	133	TCTATGTGAAACCCAGATGTGGGGAAtctctctctctctctctctcACGTGCAGTGACTGGTTGTGGATTGGGGTTGGAACTAGATAGTCTATGTACAAGTGAAAACCCGCTGGCCCACTGAGAGGCCCAATG	TCTATGTGAAACCCAGATGTGG	CATTGGGCCTCTCAGTGGG	4	68	211	22	343	19	57.779	60.077	4.17	4.61	5.29791	A	356	GAGaaaaaTGGCCAATTGGCTGAGATAATGTCCTATGGCAACAACCGGCCATCAGCCATCATCGCCATTAGCCATTAAAATGGAATGTTACTCCCTTTACTATCTATGACCAAATAGTGGTCGGAATTGGGTCGGATAGCCCATGTGTAGACCCGtctctctctctcAATATGAAACCCAGACTGTGGGTGTTtctctctctcctctctTTCTATGTGAAACCCAGATGTGGGGAAtctctctctctctctctctcACGTGCAGTGACTGGTTGTGGATTGGGGTTGGAACTAGATAGTCTATGTACAAGTGAAAACCCGCTGGCCCACTGAGAGGCCCAATGGGCCTAgggggCC
	M00842:287:000000000-BGGT4:1:1107:14583:13030	1	57	10	5	1	AC	GTGTGTGTGT	NA	1	1	4	35	198	TAGAACTAACACTGCCCGGCATCACTTTGTTGAGCATCATACtttttCTGTAGGGgtgtgtgtgtGCATtgtgtgtgCgtgtgtTTAAGATCATATCCAGAAGCTTGTTGAGATTAGTCAATATTCTCAAGCTAGGACTTGGGGTTTAAATTTATTTGAGCATTTATACTTATTACGGGGCTCTCACCGATATGTACA	TAGAACTAACACTGCCCGGC	TGTACATATCGGTGAGAGCCC	35	112	2	20	199	21	59.752	59.039	6.13	5.19	2.20968	F	310	GTAGAACTAACACTGCCCGGCATCACTTTGTTGAGCATCATACtttttCTGTAGGGgtgtgtgtgtGCATtgtgtgtgCgtgtgtTTAAGATCATATCCAGAAGCTTGTTGAGATTAGTCAATATTCTCAAGCTAGGACTTGGGGTTTAAATTTATTTGAGCATTTATACTTATTACGGGGCTCTCACCGATATGTACACTGGATGTCTTATGAACAATAGAATAGTAAGTAAAGAAATAACTAAAagagagagTTCagagagTCTCCTATGAAAGTATGAGAGGGGTGGAGATGAGGATCCTCCCCTAT
	M00842:287:000000000-BGGT4:1:1107:14894:10208	1	66	18	9	1	AG	TCTCTCTCTCTCTCTCTC	NA	1	1	3	11	90	CCGTCGCTGTTGCCATTAGCCTTTAGAAAGGCCGTGATGTAtctctctctctctctctcGGTGTGAAACCTGGACGGTGGAGAATGCTTC	CCGTCGCTGTTGCCATTAG	GAAGCATTCTCCACCGTCCA	22	11	25	19	114	20	59.284	60.036	1.73	4.02	1.75197	A	345	GATAGTGGTCGGCCATTTCGATGGCCGTCGCTGTTGCCATTAGCCTTTAGAAAGGCCGTGATGTAtctctctctctctctctcGGTGTGAAACCTGGACGGTGGAGAATGCTTCCctctctctctctCAGTGTGAAACCTATGAATGAACAATGGTGGAGTTAGGCTGGGGTTGGCCTATGTACAAAAGCAGTGGGAAGCCCAATGGGCCAGGGAGGGCCTGTTGGCCCAGTTAAGTTgagagaCTCAATGGGCCAAGGGAGGCCTATTAGACCAGTTAGACTAAGAGGCCCAATGGGCTGAGGGAGGCCTATTAGCCCAATTAGGCTAAGAGGTCCAATAGGCC
	M00842:287:000000000-BGGT4:1:1107:15078:21097	1	94	12	6	1	AG	TCTCTCTCTCTC	NA	1	1	3	53	194	GCTGTCGGCAAGTCCAATCTCCGACGAGGTCCAAGGAAATCCGATGAGGTATCACAATTTCCTCTCAGTTTTGtctctctctctcTATCTTTCTCTTGTTGGTTTGGCAGCTAGAGACGGTCGGCCTCCTCTTATAGAAGAGATCCTAGGGCCCTATCTCGAGTGTCCTAGGATTTCTTTACTGGAAGAATTGG	GCTGTCGGCAAGTCCAATCT	CCAATTCTTCCAGTAAAGAAATCCT	53	84	21	20	214	25	60.675	57.291	2.4	3.24	8.38404	A	386	GTCTTACCTCAGTCCTTGGGGCTGTCGGCAAGTCCAATCTCCGACGAGGTCCAAGGAAATCCGATGAGGTATCACAATTTCCTCTCAGTTTTGtctctctctctcTATCTTTCTCTTGTTGGTTTGGCAGCTAGAGACGGTCGGCCTCCTCTTATAGAAGAGATCCTAGGGCCCTATCTCGAGTGTCCTAGGATTTCTTTACTGGAAGAATTGGggaggaggaAGACTTCCCGCTCCCCTGtttttGtttttttGTTTCCCATGGATAGTTTTCTATCCGGGCCGTCCCAATTAATCTGGACCTCACATTACTTAAGGCCTTATGGCTAGAAGGTATGACGACTGCAGCTTATGTCATTAATTGGGTTCCTCTTAGCCTGATTAAT
	M00842:287:000000000-BGGT4:1:1107:16379:28488	1	62	19	5	1.5	AC	ACACACACACGGAGAGAGA	NA	1	1	4	8	102	ACTGATATTTGCATGCGCTCATACGCACAacacacacacGgagagagaGCAGAATAATCAATCTATTCTCCCAGTCTTGTGAAACAAGCATATCCCTTGTCT	ACTGATATTTGCATGCGCTCA	AGACAAGGGATATGCTTGTTTCAC	8	30	33	21	134	24	58.709	59.298	4.26	3.18	6.9935	B	166	TCACATAAAGTTCCCAAATTAGTGGTTCTCAAACTGATATTTGCATGCGCTCATACGCACAacacacacacGgagagagaGCAGAATAATCAATCTATTCTCCCAGTCTTGTGAAACAAGCATATCCCTTGTCTTATGAAGTATGCTTAtttttGAGTGTTATATT
	M00842:287:000000000-BGGT4:1:1107:17376:8812	1	49	12	6	1	AT	ATATATATATAT	NA	1	1	4	10	299	AAGCCATTTAGGGAATTAGAGACTTAATTACAAAatatatatatatACAAATAATaaaaaaaGAGAACAAATATTAACTTTGACTGTGACATCTGATCTCTTAtttttAAGGCACAAATCAATTAGGCATTAGGGACATCCAAGCTCAATAAGACAAGGAATCCTTAGAGTTGAACTGGGTTAGGGTTAGTCAATTGACTGGTGTCTAAGAAAAGTGGTTCAGGGATTACATCCTGAAGGAAGATGGTTACTTAATTGGTTTCGACTTACTTGGCTAACTCAGTTGGTGTCGAAGGTGT	AAGCCATTTAGGGAATTAGAGACT	ACACCTTCGACACCAACTGA	10	233	15	24	313	20	57.417	59.172	3.24	3.41	7.41095	F	390	CTTTGACATCTCATAAGCCATTTAGGGAATTAGAGACTTAATTACAAAatatatatatatACAAATAATaaaaaaaGAGAACAAATATTAACTTTGACTGTGACATCTGATCTCTTAtttttAAGGCACAAATCAATTAGGCATTAGGGACATCCAAGCTCAATAAGACAAGGAATCCTTAGAGTTGAACTGGGTTAGGGTTAGTCAATTGACTGGTGTCTAAGAAAAGTGGTTCAGGGATTACATCCTGAAGGAAGATGGTTACTTAATTGGTTTCGACTTACTTGGCTAACTCAGTTGGTGTCGAAGGTGTTGGTGAACCGTCGCACGCCCTGATACCGCGGTTGGCCTACCCTGGTGCTGGCCTGGTGAGCTGCCCAGGGTATGGTG
	M00842:287:000000000-BGGT4:1:1107:17827:7702	1	86	28	14	1	AC	CACACACACACACACACACACACACACA	NA	1	1	3	56	190	GGGTGCTTTGGACTGACTTGTCAGCTATCCTGATCACATTATGTGATATTTTGTTTTCTAACTTCATTGAATGTATTCACACTcacacacacacacacacacacacacacaTATATGATCGATCCATTTCACCaaaaaaaaTaaaaaaTaaaaaaGCCAATAATGAGTCTTTCAAACGCAAGGTACATTT	GGGTGCTTTGGACTGACTTG	AAATGTACCTTGCGTTTGAAAGA	63	56	3	20	192	23	59.046	57.492	3.16	2.52	6.46265	F	308	AGGGGTGCTTTGGACTGACTTGTCAGCTATCCTGATCACATTATGTGATATTTTGTTTTCTAACTTCATTGAATGTATTCACACTcacacacacacacacacacacacacacaTATATGATCGATCCATTTCACCaaaaaaaaTaaaaaaTaaaaaaGCCAATAATGAGTCTTTCAAACGCAAGGTACATTTTGTTGAGAATGAGTTTGAGTATaaaaaaTATGTAGAGACTAAAATTtatataATTTGGTGGTGTTATGCATAAAAGAGATATaaaaaTAAATGATATCAAATGCGCTAGTATGTCA
	M00842:287:000000000-BGGT4:1:1107:17856:6414	1	98	17	5	1.5	AG	GAGAGAGAGAAAGAGAG	NA	1	1	3	69	290	TCGGAAGAGCTCCTAAAGAATCTAACCGTTAAGCACATGAGATCGCACGTTTGGCTAGTGGCTTCTAATCAACATAAGAAATCATTCTTTGTgagagagagaAagagagATGTCTGGTGTTGCTTTACGGGTCTACATGATGTTCTACTCCCTCCCAAAATGGTGGTTAGAATAAGGATTCCTTGATGGAAACGAGGTGGTTATGTCTTGCTTCCCATGCGATCTATCATTCGCAAAGCAAGTCATACAAGAAAGATTATGTCATTCTCTTAGGAACCAAGGTGGAAttt	TCGGAAGAGCTCCTAAAGAATCT	AAATTCCACCTTGGTTCCTAAGAGA	69	156	6	23	295	25	58.718	59.925	2.4	3.1	9.35701	F	319	GTAGATCGGAAGAGCTCCTAAAGAATCTAACCGTTAAGCACATGAGATCGCACGTTTGGCTAGTGGCTTCTAATCAACATAAGAAATCATTCTTTGTgagagagagaAagagagATGTCTGGTGTTGCTTTACGGGTCTACATGATGTTCTACTCCCTCCCAAAATGGTGGTTAGAATAAGGATTCCTTGATGGAAACGAGGTGGTTATGTCTTGCTTCCCATGCGATCTATCATTCGCAAAGCAAGTCATACAAGAAAGATTATGTCATTCTCTTAGGAACCAAGGTGGAAtttttACTAATTTAACATCTAGGGAAG
	M00842:287:000000000-BGGT4:1:1107:17978:19609	1	158	16	8	1	AT	ATATATATATATATAT	NA	1	1	2	0	177	GGAAAGAGATTAAGCTACCACAAGATATGGTAATATGCAATaaaaaCTACAACTTGTGGTAATAAAGAAGAATTTAAGATCTAAATAATAAATGCCAAGAAGAAAACTTTCCAATCCTTTCTAAACTCcctcctcctTAGAatatatatatatatatGCTGTGCACATGTATGCCAA	GGAAAGAGATTAAGCTACCACAAGA	TTGGCATACATGTGCACAGC	116	0	17	25	193	20	58.593	59.473	3.02	4.4	6.93431	F	265	GTAGATCTAAATAGAAGGAAAGAGATTAAGCTACCACAAGATATGGTAATATGCAATaaaaaCTACAACTTGTGGTAATAAAGAAGAATTTAAGATCTAAATAATAAATGCCAAGAAGAAAACTTTCCAATCCTTTCTAAACTCcctcctcctTAGAatatatatatatatatGCTGTGCACATGTATGCCAAGAAGAAAACTTTCCAACCCTTTCTAAACTTTTCAAATTGGATTCAATTTCAGATTAGATTTTGGTCACTTCC
	M00842:287:000000000-BGGT4:1:1107:19138:10563	1	119	26	13	1	AG	GAGAGAGAGAGAGAGAGAGAGAGAGA	NA	1	1	4	28	133	GATCCGGCAAGAGAAAGGGTCTGGGGCATGGTGACGGGGACAAGGATTgagagagagagagagagagagagagaTTACCTTAAGCACAAGGTGGAAAGAGCAGCAAAAGAAAGCCCTTGAAGGTCACGAAGCT	GATCCGGCAAGAGAAAGGGT	AGCTTCGTGACCTTCAAGGG	28	39	71	20	203	20	59.747	59.965	4.34	3.95	0.288784	A	222	GGATGGGTTCGCGGGAGCTTGAAGCAAGCTTGAGGCTTCACAATCAGTGTCCAGATCGGGAGGGCACCCGGATCCGGCAAGAGAAAGGGTCTGGGGCATGGTGACGGGGACAAGGATTgagagagagagagagagagagagagaTTACCTTAAGCACAAGGTGGAAAGAGCAGCAAAAGAAAGCCCTTGAAGGTCACGAAGCTCTTGGGAGATGAttttttt
	M00842:287:000000000-BGGT4:1:1107:19196:25852	1	58	10	5	1	AG	AGAGAGAGAG	NA	1	1	9	1	144	agagaAAGGAATAAAGAAAGAAGGCAagagagagagAAGAGGAGGAAAGGAATGGCTTGGCCATCGTTGAGCTGTGGTGTATCAAGAAAGGTCGAGCATGCTAGCCCTTCTAGCCTCCGGTGTTGCTCTGGCAATGACAGTGGT	AGAGAAAGGAATAAAGAAAGAAGGC	ACCACTGTCATTGCCAGAGC	1	88	32	25	175	20	57.305	60.607	4.35	4.09	8.30297	F	181	AGCCTAAGGACAATAGTAAAGaaaaaaaaagagagaAAGGAATAAAGAAAGAAGGCAagagagagagAAGAGGAGGAAAGGAATGGCTTGGCCATCGTTGAGCTGTGGTGTATCAAGAAAGGTCGAGCATGCTAGCCCTTCTAGCCTCCGGTGTTGCTCTGGCAATGACAGTGGTCACTGG
	M00842:287:000000000-BGGT4:1:1107:19834:10879	1	118	12	6	1	AT	TATATATATATA	NA	1	1	6	63	191	GACCGAGCATGCACCCTAAGAGATACTCTAAAGCAAACAAGAATTCAAGttttttttAtttttAtttttttAtttttATTTTtatatatatataTTTTCAAATAAGTTAGACAAACAAAATAATTCTATCCTGGGTTGATCTAAGTCTAGACAGCTCCTAACTTCCAAGTTAGCCTTCGAGCATTCCAAGT	GACCGAGCATGCACCCTAA	ACTTGGAATGCTCGAAGGCT	63	77	36	19	226	20	59.779	59.674	2.69	4.58	1.54701	F	228	GTCTAGAGGTATAATTTTAGGTTTTAACGATCGACGACCGAGCATGCACCCTAAGAGATACTCTAAAGCAAACAAGAATTCAAGttttttttAtttttAtttttttAtttttATTTTtatatatatataTTTTCAAATAAGTTAGACAAACAAAATAATTCTATCCTGGGTTGATCTAAGTCTAGACAGCTCCTAACTTCCAAGTTAGCCTTCGAGCATTCCAAGTTA
	M00842:287:000000000-BGGT4:1:1107:20077:25237	1	127	17	5	1.5	AG	TATATATAGAGAGAGAG	NA	1	1	6	65	197	TCAAGTTGGACTACGAGGCTATTGGTAACCACAtttttttATTaaaaaaGTTaaaaaaaaaaaGAAGCTATGATTGATATCTGTCtatataTagagagagagAACTACAACATAAtttttttATTAAAACACATaaaaaTaaaaaaaaaaTGCAACTGTTAAATATCaaaaaaaGCCCACAACATAATTCTTCTTGC	TCAAGTTGGACTACGAGGCT	GCAAGAAGAATTATGTTGTGGGCT	65	71	42	20	238	24	58.371	60.082	4.58	5.19	5.71107	F	250	CGTTATCCTGCGGTTCTATCATGAGAATGGGATTGAAAACTTCAAGTTGGACTACGAGGCTATTGGTAACCACAtttttttATTaaaaaaGTTaaaaaaaaaaaGAAGCTATGATTGATATCTGTCtatataTagagagagagAACTACAACATAAtttttttATTAAAACACATaaaaaTaaaaaaaaaaTGCAACTGTTAAATATCaaaaaaaGCCCACAACATAATTCTTCTTGCTAAtttttATTA
	M00842:287:000000000-BGGT4:1:1107:20396:7741	1	183	10	5	1	AG	TCTCTCTCTC	NA	1	1	2	38	178	TCCACCTAAGTTTGTATCATGCCTTGtatataTTTAAAATAGGCTATGCCatatatatGTTCCTCTTTAAAATTTATATGCAAAATCAAATTACAAGTCTCCTTTTCCATtctctctctcTTACACATAAATGTAAATTTATCTTAAAATTATTTTAGAGATTTGACCTTGGTCGGCC	TCCACCTAAGTTTGTATCATGCCT	GGCCGACCAAGGTCAAATCT	86	38	73	24	250	20	59.773	60.323	4.75	2.4	4.54985	B	353	GACTTGATTGTTCTGCCttttttttttttAATGAGATGATAGGGTAGGAACATAAGCATTGAGTTGTATAGCTCCACCTAAGTTTGTATCATGCCTTGtatataTTTAAAATAGGCTATGCCatatatatGTTCCTCTTTAAAATTTATATGCAAAATCAAATTACAAGTCTCCTTTTCCATtctctctctcTTACACATAAATGTAAATTTATCTTAAAATTATTTTAGAGATTTGACCTTGGTCGGCCAGCTACATATGAGAAGGTATTTGACCGCATGCACCAAGACAAGAATGGTGACTTTGTGAATGAAAAGGCAAAGGAAGTTAGTGTAAGTAATAAACACTAATTG
	M00842:287:000000000-BGGT4:1:1107:21807:3756	1	190	10	5	1	AG	CTCTCTCTCT	NA	1	1	4	96	241	TCCGTTCTTCCACTCCCGATTcccccTCTGTGTCCTCTccccccTCCCTTGATTCCCCTCTCCCCTCCTTTCCTCTGATTTCTTCCAATTTcccccTCCTCAGATCTTCCCTCTCCctctctctctGCGTTCACAGCTCCCCTTCACAAACTACTCCCTCGAGCCAAAACCACAGGcccccAGCTTTGCATCCCGACCCCTCCTGCTACCTCTTCCCCATGCCCGaccaccaccTACCGAC	TCCGTTCTTCCACTCCCGAT	GTCGGTAGGTGGTGGTCG	96	97	74	20	314	18	60.614	59.43	4.18	4.79	3.18403	F	324	AATTTCATGAGAAAATTGGTgaagaagaaTTGAAGAAAGtttttCCAAAGCTTGGTTTCCTccccccccccccTCCGTTCTTCCACTCCCGATTcccccTCTGTGTCCTCTccccccTCCCTTGATTCCCCTCTCCCCTCCTTTCCTCTGATTTCTTCCAATTTcccccTCCTCAGATCTTCCCTCTCCctctctctctGCGTTCACAGCTCCCCTTCACAAACTACTCCCTCGAGCCAAAACCACAGGcccccAGCTTTGCATCCCGACCCCTCCTGCTACCTCTTCCCCATGCCCGaccaccaccTACCGACGCCCCGCCAG
	M00842:287:000000000-BGGT4:1:1107:22173:10039	1	145	22	11	1	AG	TCTCTCTCTCTCTCTCTCTCTC	NA	1	1	4	44	168	TCTTGCATGACGTCTGTGACAAAGACTTTTAGATGCTATGCAGAATGGACTAAATTTACAGTTATCACCATTATTGTAACCTtctctctctctctctctctctcAATTGAAGGATTTCTATTGTTCCATGTGATCACAATGCCATTCATGCATGATTCCCACTGGAGG	TCTTGCATGACGTCTGTGACA	CCTCCAGTGGGAATCATGCA	61	44	63	21	230	20	59.932	59.743	3.58	3.96	1.32519	A	248	AGGTTCTTCCTCACCGCTGCAATGAGGGATTGCCTTAGTCCAATTCATGGGCCACACCATGTTCTTGCATGACGTCTGTGACAAAGACTTTTAGATGCTATGCAGAATGGACTAAATTTACAGTTATCACCATTATTGTAACCTtctctctctctctctctctctcAATTGAAGGATTTCTATTGTTCCATGTGATCACAATGCCATTCATGCATGATTCCCACTGGAGGGAggggggaaaaaaaaCT
	M00842:287:000000000-BGGT4:1:1107:23000:6475	1	163	76	11	2	AG	ATATATATATATATACAGAGATACAAATAAATAGATAGATATAGAAATAGAGACAGAGAGAGAGAGAGAGAGAGAG	NA	1	1	2	16	190	TATTCCCTGTTCTGCCTcccccATCCCCGCCCCAcccccTTTCTCTGTCTGTTCTCAACTGTGACATGAATAAACAatatatatatatatACAGAGATACAAATAAATAGATAGATATAGAAATAGAGACagagagagagagagagagagagATGATAGTATCACATTGTGCTGTCAGATCCCTTTACCA	TATTCCCTGTTCTGCCTCCC	TGGTAAAGGGATCTGACAGCAC	56	16	87	20	276	22	58.787	60.027	4.3	4.4	3.24049	G	308	ATGCTGGTTCAGCAAACCTTGGGAGTGGGTGATTATAAAATGGGATTGACATGATCAATTGCCTATGTATGGTTATGTGATACTGTTATTCCCTGTTCTGCCTcccccATCCCCGCCCCAcccccTTTCTCTGTCTGTTCTCAACTGTGACATGAATAAACAatatatatatatatACAGAGATACAAATAAATAGATAGATATAGAAATAGAGACagagagagagagagagagagagATGATAGTATCACATTGTGCTGTCAGATCCCTTTACCAATCAAAATACAATACTTACCCCTAACAAAATT
	M00842:287:000000000-BGGT4:1:1107:24040:13388	1	91	15	5	1	ATC	TGATGATGATGATGA	NA	1	1	3	69	213	AGCActctctTCACCGAATGGGTTACTCCAAGGTATAAGGTAGATGGATCTATAGGACTTTAGAACTAGAAGTTGTAGCTACTCCAGTTCtgatgatgatgatgaTGGAGGGGATGAGCCATAGCCATCGCCCATCACCTCACCATTAGAGCCAGCATAGGCTGAAGGAGACATTACTGGACCCTCATAGATAGACATTCCCAGGACTccacc	AGCACTCTCTTCACCGAATGG	GGTGGAGTCCTGGGAATGTC	69	88	1	21	213	20	60.067	59.747	3.16	3.06	1.3199	F	473	AGCActctctTCACCGAATGGGTTACTCCAAGGTATAAGGTAGATGGATCTATAGGACTTTAGAACTAGAAGTTGTAGCTACTCCAGTTCtgatgatgatgatgaTGGAGGGGATGAGCCATAGCCATCGCCCATCACCTCACCATTAGAGCCAGCATAGGCTGAAGGAGACATTACTGGACCCTCATAGATAGACATTCCCAGGACTccaccaccaGCACCATCTATATTCTCTGATCAGTCGATTAGAGTCAGTTTTGAGTAGTTCACAGTATTTGTAGacacacTGACTATCAGGATGAGCTCTATAATAGCTGAGCTTAGCCAGTAGATTACTCAAAACTATCAAGAGTTGAGATAGGATCTAAGGGACCTCACCCTCAGAGTAAAGGTCTTAGA…
	M00842:287:000000000-BGGT4:1:1107:24573:15115	1	100	10	5	1	AG	TCTCTCTCTC	NA	1	1	2	50	176	ACACTAACAATCCATCCTTCTCCCCTAAAAGGAGAttttttAAAATATaaaaaTATAACGCTTGGGCTAAGGGTCAAGTTGGTCAtttttCTTACAtctctctctcCCCAccccccGaaaaaGTGAGTGATGAGATAGCTCCGCACCATCGGAACTTTTCTCAGCCATCGGATCGG	ACACTAACAATCCATCCTTCTCCC	CCGATCCGATGGCTGAGAAA	72	50	4	24	179	20	60.08	59.895	4.3	2.52	4.18515	F	198	TCCACACTAACAATCCATCCTTCTCCCCTAAAAGGAGAttttttAAAATATaaaaaTATAACGCTTGGGCTAAGGGTCAAGTTGGTCAtttttCTTACAtctctctctcCCCAccccccGaaaaaGTGAGTGATGAGATAGCTCCGCACCATCGGAACTTTTCTCAGCCATCGGATCGGCCGCTCTTCCCTTTCCCTC
	M00842:287:000000000-BGGT4:1:1107:24623:17966	1	284	38	5	1.5	AAT	ATTTTTATTTTTATTTTTTATTTTTATTATTATTATTA	NA	1	1	2	25	206	TCAAATATCCTCCCACTGcccccTTCTTGGATAAACTCCTTCTCTAAGAATGTGGTATGCCTACTGACaaaaaCCTTTTGTTCAGTAGGGTGGTAGAAAAGGTATCCCATTCtttttttttatttttatttttatttttTATTTttattattattattattttttttttAGGATATCCTACAAACCTGCACTTATTAGCCCTAGCA	TCAAATATCCTCCCACTGCCC	TGCTAGGGCTAATAAGTGCAGG	100	25	163	21	368	22	59.505	59.895	5.36	4.85	3.59951	F	437	ATACTGGCTTCATTGTCATTCCCAATGATAGAGCCATATCTGAGAGGTGCACCCCGCActctctctGATCTACGGAGAGGAGGTATGTGCTGTAGTTGTTCCTGAACCTTAAGAACATCTGGTTGAGGAATCACCTCAGGTGTAGGTTGAACtttttCAAGTTCAAATATCCTCCCACTGcccccTTCTTGGATAAACTCCTTCTCTAAGAATGTGGTATGCCTACTGACaaaaaCCTTTTGTTCAGTAGGGTGGTAGAAAAGGTATCCCATTCtttttttttatttttatttttatttttTATTTttattattattattattttttttttAGGATATCCTACAAACCTGCACTTATTAGCCCTAGCACTTAGCTTATGTCCAAAGACATACTTGACAT…
	M00842:287:000000000-BGGT4:1:1107:25172:10810	1	56	10	5	1	AG	AGAGAGAGAG	NA	1	1	1	12	189	TCAGCAAGATAGGCAATAGCAATAAAAGAGAAAagagagagagTATaaaaaTTTAGCATGTCTGTGGAGAAGTAAGAGTGAAGGAGTCTTGCCTAGACTTAGGTTAAATTGGCTTGCTTGACCTTAGGTTGTCCATAGATGATAGAGTGGGGTCCTTtatataGAGTACAGTTGGAACCAGTCAGGAGC	TCAGCAAGATAGGCAATAGCA	GCTCCTGACTGGTTCCAACT	12	126	23	21	211	20	57.156	59.602	3.49	3.16	4.24221	F	254	CGAAGActctctGATACTCATATCAGCAAGATAGGCAATAGCAATAAAAGAGAAAagagagagagTATaaaaaTTTAGCATGTCTGTGGAGAAGTAAGAGTGAAGGAGTCTTGCCTAGACTTAGGTTAAATTGGCTTGCTTGACCTTAGGTTGTCCATAGATGATAGAGTGGGGTCCTTtatataGAGTACAGTTGGAACCAGTCAGGAGCATGCCTTAGAAATCttttttGTTACAGTAGAAGAACAATAAAA
	M00842:287:000000000-BGGT4:1:1107:25300:16024	1	136	14	7	1	AG	TCTCTCTCTCTCTC	NA	1	1	6	23	148	GCTAGATGCAGAACCGCAGAAGTTACTAAATTGCGTGGAATTTTATAATAGCCATTCTTTAAATAAACTTTTATTCttttttGTTTCTTtctctctctctctcttttttttGTCTGTATGCATGTCTGtctctcAGTCATGcacacaA	GCTAGATGCAGAACCGCAGA	TTGTGTGCATGACTGAGAGACA	69	23	47	20	194	22	60.179	59.897	4.26	3.41	2.28202	F	221	GCTTTCCATGTGTTTCTATGTCAGATTATCATACTTATGTATTTATGCTAGATGCAGAACCGCAGAAGTTACTAAATTGCGTGGAATTTTATAATAGCCATTCTTTAAATAAACTTTTATTCttttttGTTTCTTtctctctctctctcttttttttGTCTGTATGCATGTCTGtctctcAGTCATGcacacaAatatatAATTCCTAGCACTTATAATAT
	M00842:287:000000000-BGGT4:1:1107:25324:24083	1	190	12	6	1	AG	CTCTCTCTCTCT	NA	1	1	2	111	297	ACACCTGACCAGACAACTCTATAAAAGGAcccccTGCCATGCTCAGGGGTCAGGCTaaaaaaaaTAGGCTCATTCATGCCCATCTAAATTGACAATTACATCTTACTCCAAAGAttttttGACTCTTTCTCctctctctctctTCCTTTATTCTTTTACTACTATTGTCAATCTTGCTGACTTGAGTGTCGGAGGGTCCTTGCTGATACTATATCCAGCTAGGGGACATTTTGTAGATCGATCTCTAGCCCCGAAGGAAGAAGACGTCACCCCTATTTAGCCACAACGACATGCTCT	ACACCTGACCAGACAACTCT	AGAGCATGTCGTTGTGGCTA	111	134	59	20	355	20	58.205	59.392	3.24	3.93	2.40284	F	388	GTAGATCGGAAGAGCTCAGTTATTCTGTTAAATGCTCCTAACaaaaaTTATTCtttttACACCTGACCAGACAACTCTATAAAAGGAcccccTGCCATGCTCAGGGGTCAGGCTaaaaaaaaTAGGCTCATTCATGCCCATCTAAATTGACAATTACATCTTACTCCAAAGAttttttGACTCTTTCTCctctctctctctTCCTTTATTCTTTTACTACTATTGTCAATCTTGCTGACTTGAGTGTCGGAGGGTCCTTGCTGATACTATATCCAGCTAGGGGACATTTTGTAGATCGATCTCTAGCCCCGAAGGAAGAAGACGTCACCCCTATTTAGCCACAACGACATGCTCTCGACAATGATGTCATCCATTGCTCAGATCGGTG
	M00842:287:000000000-BGGT4:1:1107:25676:6644	1	170	12	6	1	AT	ATATATATATAT	NA	1	1	4	45	189	CCCTTAACCTTGgagagaTAAGGAAAACCCTCTATTTATCCCTCTATCTATCCTTTAAATAAAATTAAAatatatatatatAAAACAAACCCTATCAtctctctcCCTCTCCctctctCAACTCTACTCTTTCCCTCTcccccTCGAGTCTGAtctctcCCTCTCCCTCTCAACTCGAAGTGTGAGGCC	CCCTTAACCTTGGAGAGATAAGGA	GGCCTCACACTTCGAGTTGA	45	88	101	24	289	20	59.031	59.966	3.36	3.18	5.00286	F	336	GATAAACCAAGAGATAACACCTAGTTTATTCCAAACACTCTATAGAAAAGGGATAACTAAAATAGGGTTGATAAATCTCAGTTATCCACTACATCTTATCCCCTTAACCTTGgagagaTAAGGAAAACCCTCTATTTATCCCTCTATCTATCCTTTAAATAAAATTAAAatatatatatatAAAACAAACCCTATCAtctctctcCCTCTCCctctctCAACTCTACTCTTTCCCTCTcccccTCGAGTCTGAtctctcCCTCTCCCTCTCAACTCGAAGTGTGAGGCCTGGCACCCACACGATGTCACAGGCAAAGTCGGCTCTGAGTGCCGACT
	M00842:287:000000000-BGGT4:1:1107:26013:13392	1	206	33	8	1.5	AC	TATATACATATATATATGTGTGTGTGTGTGTGT	NA	1	1	5	69	273	ACAACTGCAGTGATACTTATACCAAATGAGctctctTAGAATTTTATCATAAAATTAGATTTCTTTTCaaaaaTGGAGGTTTGATCTACTCAAAAGATTATTTGGGTATCTTTAGTTACTATATTTTAAtttttttAAATTATTGGTATtatataCatatatatatgtgtgtgtgtgtgtgtCAAGAATCTATGAATCAGATTCTATGAAGGTTGTTTTAGTTCCTACTTTTCACTCACAAATTAAACTCTTGCATCATTGGCAATGTTTGGA	ACAACTGCAGTGATACTTATACCAA	TCCAAACATTGCCAATGATGCA	124	69	57	25	329	22	58.293	59.698	3.67	3.96	9.00945	F	349	tttttATGTTGAAAAGCAACATTAAAGCTTCATTTGGAAATTCCATTGAtttttAAACAACTGCAGTGATACTTATACCAAATGAGctctctTAGAATTTTATCATAAAATTAGATTTCTTTTCaaaaaTGGAGGTTTGATCTACTCAAAAGATTATTTGGGTATCTTTAGTTACTATATTTTAAtttttttAAATTATTGGTATtatataCatatatatatgtgtgtgtgtgtgtgtCAAGAATCTATGAATCAGATTCTATGAAGGTTGTTTTAGTTCCTACTTTTCACTCACAAATTAAACTCTTGCATCATTGGCAATGTTTGGAAAGTTTACCTACTCAGATCA
	M00842:287:000000000-BGGT4:1:1107:26324:14952	1	277	28	14	1	AG	TCTCTCTCTCTCTCTCTCTCTCTCTCTC	NA	1	1	4	33	140	AGATCTTCTGCATGCCACCAATGAAGACAAGTGATGACGGCAAATGTCATCCCAATGAGtctctctctctctctctctctctctctcCTGAACAGTGCAAAAGGGACATGAAGTTAGGTGCAGGGCTCTTCCTCTAGTGC	AGATCTTCTGCATGCCACCA	GCACTAGAGGAAGAGCCCTG	39	33	218	20	357	20	59.378	59.536	4.17	4.45	1.08576	A	361	TGAAACGCGAGCCCACAACTTAACCAAGGCCACCAATGTATGCAAGCACCCAGGAGTCCTTTTACCAACCCAATGTTCTTCGATACTCCCAtctctcCCTTTATCCCTCAACCCATCAATGCCTTTTATGAGTCTCCAAAAGCTATACCTGCTTCCCTAGTCCCTAGCTTCGAAGCATGGCAAATGCATCACAATGGAACATATGACTTCTTTGAGTAGATCTTCTGCATGCCACCAATGAAGACAAGTGATGACGGCAAATGTCATCCCAATGAGtctctctctctctctctctctctctctcCTGAACAGTGCAAAAGGGACATGAAGTTAGGTGCAGGGCTCTTCCTCTAGTGCTATT
	M00842:287:000000000-BGGT4:1:1107:26325:7736	1	69	14	7	1	AG	TCTCTCTCTCTCTC	NA	1	1	3	30	190	CCCTATTTGTCAAGAaagaagaagaagAGGAGgagagagaGCTCATTCCTTTCTTtctctctctctctcATCCctctctctTTCTAAAAGATCTATGGATCCTAGGAAAGGGTCCCATCTACTTATTTTATGGATCTAAGTTGGCTTTTCCAAGCCTTGGTGCCTAGGCCACCTATGGAACTAATTACTC	CCCTATTTGTCAAGAAAGAAGAAGA	GAGTAATTAGTTCCATAGGTGGCCT	30	96	14	25	203	25	57.014	59.928	2.87	5.19	13.058	F	233	ACTGACATCTTTCCCCTATTTGTCAAGAaagaagaagaagAGGAGgagagagaGCTCATTCCTTTCTTtctctctctctctcATCCctctctctTTCTAAAAGATCTATGGATCCTAGGAAAGGGTCCCATCTACTTATTTTATGGATCTAAGTTGGCTTTTCCAAGCCTTGGTGCCTAGGCCACCTATGGAACTAATTACTCTAGACTtatataGTGTTTTGAAAACCCATT
	M00842:287:000000000-BGGT4:1:1107:27133:20439	1	95	10	5	1	AG	CTCTCTCTCT	NA	1	1	3	56	191	tCAGTGGAAGAAGTCGTGAAGAACTTAGGTGAAAGGAGATAAGAAACAAGAGAAACTTTAGTTTGATTTAGGACTTAGctctctctctCAAAGaaaaaaaTCAGAATGGTGCCTAGGAAGCCCtttttCTAGTGCCAttttttATTGCGGCGCCCTCACTAAAGCTTGCATCGGATGCTAGGTGGACTTCC	TCAGTGGAAGAAGTCGTGAAGA	GGAAGTCCACCTAGCATCCG	56	83	17	22	207	20	59.044	59.895	2.87	4.18	3.06137	F	264	AACCCCAAGGtttttttCAGTGGAAGAAGTCGTGAAGAACTTAGGTGAAAGGAGATAAGAAACAAGAGAAACTTTAGTTTGATTTAGGACTTAGctctctctctCAAAGaaaaaaaTCAGAATGGTGCCTAGGAAGCCCtttttCTAGTGCCAttttttATTGCGGCGCCCTCACTAAAGCTTGCATCGGATGCTAGGTGGACTTCCAGGGAGCTGATGTAGATGGAGATGAAatatatAAGGGAAGGATCGGCAGATGAGCTC
	M00842:287:000000000-BGGT4:1:1107:27710:14618	1	193	10	5	1	AG	GAGAGAGAGA	NA	1	1	6	76	204	CCAGTTCGGAGCATCTCGAGAAAGACCAAAGGGAACCGGGATAGTTCCGACGACCAAAATGAGATGCTGGTGATGGAAGGGAAGGAGAAGGAGAAGGGgagagagagaggggggggggggAGGGAGGAAGAGGgagagaAAGAAAGACAAagagagATGGCTGCTAGTCAACGAAGAGCCGATGGCCGCATAGAAGAGGCAGAG	CCAGTTCGGAGCATCTCGAG	CTCTGCCTCTTCTATGCGGC	78	76	95	20	298	20	60.249	60.6	4.04	6.53	0.848554	F	342	ATAAGATGTGCATTAAAACTCAAAAGCCAGCTTTGACTTTACTGAAAGCCTTTTCATCAAATTGTTATGCAACAAGCAAGGTCGTTAGAACTCTCCAGTTCGGAGCATCTCGAGAAAGACCAAAGGGAACCGGGATAGTTCCGACGACCAAAATGAGATGCTGGTGATGGAAGGGAAGGAGAAGGAGAAGGGgagagagagaggggggggggggAGGGAGGAAGAGGgagagaAAGAAAGACAAagagagATGGCTGCTAGTCAACGAAGAGCCGATGGCCGCATAGAAGAGGCAGAGAAGGGAGAATGGGAGAAAGGaaaaaagagagaGCAagagagagA
	M00842:287:000000000-BGGT4:1:1107:4958:22383	1	58	36	18	1	AT	ATATATATATATATATATATATATATATATATATAT	NA	1	1	3	34	192	TCTCACTGAGGTTCCACTGTCAACGTTTCACGGTCACAGCTCCTGGATCCCATGCatatatatatatatatatatatatatatatatatatAGGTAGACCAAGAAGCCGAACGTACTTACCCAATGCAACTAGACTTGCTCCGGCGGGAACCTTGGAGGCTAGCTCAATTTTAGCAGCCCGTTACCTTATTT	TCTCACTGAGGTTCCACTGTC	AAATAAGGTAACGGGCTGCT	34	81	3	21	194	20	59.036	57.199	3.51	4.24	4.7653	A	205	TTTCTCACTGAGGTTCCACTGTCAACGTTTCACGGTCACAGCTCCTGGATCCCATGCatatatatatatatatatatatatatatatatatatAGGTAGACCAAGAAGCCGAACGTACTTACCCAATGCAACTAGACTTGCTCCGGCGGGAACCTTGGAGGCTAGCTCAATTTTAGCAGCCCGTTACCTTATTTTCGCTGGATTA
	M00842:287:000000000-BGGT4:1:1107:5327:15186	1	143	16	8	1	AG	AGAGAGAGAGAGAGAG	NA	1	1	3	91	248	CCTCTAGCAAGTCACTTTGCCTTATGGACGGCCTTCTTTGTGGCTTAGTGAAATCATTCCTATGatcaatcaatcaaaaaaGGTTAGTTTCAATTATAATCAAAGCACaaaaaaaaaGTAagagagagagagagagAAATAAAATAATGAATAAACTTagaagaagaAATATACTCAGGGTTGTGCTGAGAAAGTTCTTCAAACTTAGATCAGCTGCAAACAAATTTTGTTCTGAGAGCAGCTCTAGA	CCTCTAGCAAGTCACTTTGCC	TCTAGAGCTGCTCTCAGAACA	99	91	23	21	270	21	58.92	57.921	4.52	3.18	5.15882	F	277	CGGAACCCTTTTGGAAGGTTCTCCTCTAGCAAGTCACTTTGCCTTATGGACGGCCTTCTTTGTGGCTTAGTGAAATCATTCCTATGatcaatcaatcaaaaaaGGTTAGTTTCAATTATAATCAAAGCACaaaaaaaaaGTAagagagagagagagagAAATAAAATAATGAATAAACTTagaagaagaAATATACTCAGGGTTGTGCTGAGAAAGTTCTTCAAACTTAGATCAGCTGCAAACAAATTTTGTTCTGAGAGCAGCTCTAGAAGCTTAG
	M00842:287:000000000-BGGT4:1:1107:5716:18385	1	189	59	10	1.5	AC	ACACACACACACACACACACATATATATGTGTGTGTGTGTGTGCGCGCGCATGTGTGTG	NA	1	1	2	2	193	TCGAAAGCTAGGAAAGACTAGTCTAACTATGTAAGAAGAATTAAGGTTAAAACTAAATCAAATATGGATTGAAAACCAatatatCTATATCCATATTTATTTTATTTATTGAacacacacacacacacacacatatatAtgtgtgtgtgtgtgtgcgcgcgCAtgtgtgtgTATACCCGCATGCATGTTACGG	TCGAAAGCTAGGAAAGACTAGTCT	CCGTAACATGCATGCGGGTA	88	2	77	24	269	20	58.745	60.812	3.24	3.69	6.06691	B	277	CCTACCCGTTGCCATCCCTAATCACCACCATCAACGAAGAGACAACCACTAATTTCAAAccccccTACTAATTATTTCGAAAGCTAGGAAAGACTAGTCTAACTATGTAAGAAGAATTAAGGTTAAAACTAAATCAAATATGGATTGAAAACCAatatatCTATATCCATATTTATTTTATTTATTGAacacacacacacacacacacatatatAtgtgtgtgtgtgtgtgcgcgcgCAtgtgtgtgTATACCCGCATGCATGTTACGGGATTCTCA
	M00842:287:000000000-BGGT4:1:1107:6864:20339	1	173	22	11	1	AG	AGAGAGAGAGAGAGAGAGAGAG	NA	1	1	18	0	90	TGGTTTAAGGAGTACTGTGGGCagagagagagagagagagagagTACTGGAAACATGGTTTAAGGAGTACCATGGGCTTTGTCCTTGCAG	TGGTTTAAGGAGTACTGTGGGC	CTGCAAGGACAAAGCCCATG	0	26	151	22	240	20	59.961	59.754	5.36	3.66	2.28489	A	287	CATCCGTAGAACATCCAAGCATGTACCATGATGTGATGCCTGTTTTGCCGTGTAATTTGCCAAATACCACATAGTACATGTTAGTTTTCAGTCTTCAAAAGATGACACTAAAATATTTATCagagagagagagagagagTACTaaaaaCATGGTTTAAGGAGTACTGTGGGCagagagagagagagagagagagTACTGGAAACATGGTTTAAGGAGTACCATGGGCTTTGTCCTTGCAGGCTTGCACAGAGTAAGGTCATTTGCACTGGATAAGAAGTGCCATTTT
	M00842:287:000000000-BGGT4:1:1107:6870:14494	1	51	30	6	1.5	AG	AGAGAGAGAGAGAAAGAGAGACAGAGAGAG	NA	1	1	4	30	200	CGGTAGATCGGAAGGCAAGGTGGGAGAGTTACCGGTAACTCGTCTAAATCagagagagagagAAagagagACagagagagTGAGTGATCCAAGTTCAAGAAGAGAAGAAAAGTGGAAGGCCAGCTCAATGCCATGAAGTTGGCGTCTCCTACTACCCTTTTAAAGAGGCGACCTCCAACAAGCTTCACAACGTCGTGTGA	CGGTAGATCGGAAGGCAAGG	TCACACGACGTTGTGAAGCT	30	100	1	20	200	20	60.249	60.179	3.61	3.74	0.42861	B	350	CGGTAGATCGGAAGGCAAGGTGGGAGAGTTACCGGTAACTCGTCTAAATCagagagagagagAAagagagACagagagagTGAGTGATCCAAGTTCAAGAAGAGAAGAAAAGTGGAAGGCCAGCTCAATGCCATGAAGTTGGCGTCTCCTACTACCCTTTTAAAGAGGCGACCTCCAACAAGCTTCACAACGTCGTGTGAGCGAGGGAAGTGGAGCTTAATTTACTCAAGTGCCCCTAATATTGTTTGCAACTACGAAGCTTGCCCTCCTCACTTCTCCTGTCAATCATTTGACCCTGTTGCAATGCTCTCATCAGAGCGTACATCCGATGGAATGTAGGCtatataGAG
	M00842:287:000000000-BGGT4:1:1107:6931:12659	1	172	10	5	1	AG	CTCTCTCTCT	NA	1	1	4	86	300	GTGATGCCTCGAGGGACATGCGAAgggggAATAGTgggggTACCCGGGGAGAAGGGGAAGCTGAACTAACATTTGGCTCCCTTCCACCCTTTCTCTTCGGTGTCCActctctctctTTTCCTCCCTTGTTCACCCTCCTTCCTTCCCCAGTGATCCAAGctctctTCGGTCATGTTCTTGCTGTCGAGCACCCAAGTAAATGCCAAGGAATGCCAACGATCACTGAGTTAGGGTAAGGCCTTATTTCCTTTGTCTCCctctctctCATTAGAAGTCTTAGGCCCAAATGATGGAGGTCCA	GTGATGCCTCGAGGGACATG	TGGACCTCCATCATTTGGGC	86	164	66	20	365	20	60.532	60.033	3.21	5.36	0.564739	F	367	TGCGGCCTAGGGTAGCCCAGCACAGGGACAAGTTTGTGGGGTGCTCAGAAGTTTCTAGGATGCCTGTGATGCCTCGAGGGACATGCGAAgggggAATAGTgggggTACCCGGGGAGAAGGGGAAGCTGAACTAACATTTGGCTCCCTTCCACCCTTTCTCTTCGGTGTCCActctctctctTTTCCTCCCTTGTTCACCCTCCTTCCTTCCCCAGTGATCCAAGctctctTCGGTCATGTTCTTGCTGTCGAGCACCCAAGTAAATGCCAAGGAATGCCAACGATCACTGAGTTAGGGTAAGGCCTTATTTCCTTTGTCTCCctctctctCATTAGAAGTCTTAGGCCCAAATGATGGAGGTCCAAT
	M00842:287:000000000-BGGT4:1:1107:7309:21149	1	72	10	5	1	AG	AGAGAGAGAG	NA	1	1	4	1	116	AAGGCATGCagagagAACCCTagagagagagGGGCATGAGGTAATAGGAAGAAGAGtttttCTGTTTTCTCCTTGGGgtgtgtGAGATCTTAATTTTGGGAGAGTGCATCTAAGCA	AAGGCATGCAGAGAGAACCC	TGCTTAGATGCACTCTCCCA	1	65	51	20	166	20	60.035	58.428	4.11	4.37	1.60662	F	246	TATTCCTTCTTCAGaaaaaaaaaaGGATGCCTTAGAAAAGGTTTCTGAGGAAGGCATGCagagagAACCCTagagagagagGGGCATGAGGTAATAGGAAGAAGAGtttttCTGTTTTCTCCTTGGGgtgtgtGAGATCTTAATTTTGGGAGAGTGCATCTAAGCATCCAAGAAAGAGAAGAAAAGATAGGAAGAGTTCCGTCTTCTTCATTTTCCTCCATCCGTGTTATGtttttATATCATATC
	M00842:287:000000000-BGGT4:1:1107:8285:22161	1	78	34	9	1.5	AC	TGTGTGTGTGTGTGTGTGAGAGAGAGAGAGAGAG	NA	1	1	3	34	289	GCTGACTGACCAAACTCAGATCTCTAAAATAATTTTAAGACAAATTTAGATTTAtgtgtgtgtgtgtgtgtgagagagagagagagagCATGGAAAAGGAGACTTATAACTTGACCTTGCATGTATATTTTAAAGGAGAACatatatACAATTGAGCCAATTTTAAATATGAAAGCAATGATGAGAAGAATTACGTATTTACAAAATTCTACTTAAATAATGCAATAATTTAGTTATAAACaaaaaTAATAGAATGAcccccATTAAAGCAACCAATGCCTCCCACATC	GCTGACTGACCAAACTCAGA	GATGTGGGAGGCATTGGTTG	34	181	24	20	312	20	57.467	59.18	3.27	3.77	3.35285	F	339	AGTCAAACATCTCCTTATATGTAGCTGACTGACCAAACTCAGATCTCTAAAATAATTTTAAGACAAATTTAGATTTAtgtgtgtgtgtgtgtgtgagagagagagagagagCATGGAAAAGGAGACTTATAACTTGACCTTGCATGTATATTTTAAAGGAGAACatatatACAATTGAGCCAATTTTAAATATGAAAGCAATGATGAGAAGAATTACGTATTTACAAAATTCTACTTAAATAATGCAATAATTTAGTTATAAACaaaaaTAATAGAATGAcccccATTAAAGCAACCAATGCCTCCCACATCAAACCCAACACATAGGCTAATAAATTT
	M00842:287:000000000-BGGT4:1:1107:8478:4401	1	85	12	6	1	AT	ATATATATATAT	NA	1	1	4	18	103	ACCGTTCAGCATCCTTCTCAGGAAAGCTACGTGATTACatatatatatatAACTGCATCCTAAATAATTAGAAACAGGTTATTGTAATGACACCAAAGCCACT	ACCGTTCAGCATCCTTCTCA	AGTGGCTTTGGTGTCATTACA	18	32	47	20	149	21	59.023	57.778	3.27	2.41	4.19881	A	156	CGGTAGATCGGAATATAGTTAAAAGTAACACAGTTACAAAACAAATACCGTTCAGCATCCTTCTCAGGAAAGCTACGTGATTACatatatatatatAACTGCATCCTAAATAATTAGAAACAGGTTATTGTAATGACACCAAAGCCACTTAAAAGT
	M00842:287:000000000-BGGT4:1:1107:8778:10922	1	80	22	7	1.5	AG	TCTCTCTCTCTCTCTATCTCTC	NA	1	1	4	34	151	gggAGATGGGCACAAGAGAAACATAGACGAAGAGGAATAGTCTCtttttCTCCTtctctctctctctcTAtctctcGGTGTCTTGGTCTTCCTCTcccccAAGCAAGCACCACTGAGCTTTCTTATTTTCCTCTCATCTCAAGCTCTTCCG	GGGAGATGGGCACAAGAGAA	CGGAAGAGCTTGAGATGAGAGG	34	53	26	20	176	22	59.379	60.224	2.87	3.69	2.84434	F	180	ATCAATGCATTTTGGGTTggggggggggAGATGGGCACAAGAGAAACATAGACGAAGAGGAATAGTCTCtttttCTCCTtctctctctctctcTAtctctcGGTGTCTTGGTCTTCCTCTcccccAAGCAAGCACCACTGAGCTTTCTTATTTTCCTCTCATCTCAAGCTCTTCCGATCT
	M00842:287:000000000-BGGT4:1:1107:9710:9802	1	67	18	6	1	AAT	TTATTATTATTATTATTA	NA	1	1	5	34	186	TGCAGAGACCCAGGTATTTGAATCTCTACAAAGGCTTCTTTTCTGCTTTTGTACTttattattattattattaTTTTGAGAACAATACATAAGGACatatatTGGTGTTATGTTGCTGTTCAAATTTAATCATACTTTATATGCCTAATTGCCTCCAGTTGTTGAAGAAGGTCCCAAGATGTCGGG	TGCAGAGACCCAGGTATTTGA	CCCGACATCTTGGGACCTTC	34	93	12	21	197	20	58.735	60.108	2.69	3.46	2.37302	B	323	ACTGCAAAAGATGCAGAGACCCAGGTATTTGAATCTCTACAAAGGCTTCTTTTCTGCTTTTGTACTttattattattattattaTTTTGAGAACAATACATAAGGACatatatTGGTGTTATGTTGCTGTTCAAATTTAATCATACTTTATATGCCTAATTGCCTCCAGTTGTTGAAGAAGGTCCCAAGATGTCGGGTTTTAGTTCTGGTCCTATCTCTTCTAATGCATACAGAATGCATGTGCATGTCATCCACTACATATGTAAGTGCATGAAATCTTGTCCGTCTAATCTCCAGCTTAACAGGAGGTAAGaaaaaaTATC
	M00842:287:000000000-BGGT4:1:1108:10045:22880	1	237	15	5	1	AGG	TCCTCCTCCTCCTCC	NA	1	1	2	31	190	aCACAAGACCGGCAGGAAATAAAATCATCGGTTAGCaaaaaaTCTTAGATAAGAGGATacacacCTTTATAGGGTTGATAGATCTGATCAAGATGAGCTTGAGTCACCAATCTCTGGCGACTTAtcctcctcctcctccTCTTCCAAGCCTCAGGTCCCAATCATGCCACTGGAGGTCTGGATCAGGGTT	ACACAAGACCGGCAGGAAAT	AACCCTGATCCAGACCTCCA	104	31	113	20	302	20	59.89	59.881	2.17	3.86	0.229641	F	333	GATACCACAGCACATGCaaaaaGAGAAGATTGAACAATCTTGCACATGCATTCTTATGATACCATAGCACCAATGATGTTAACATCAGCACGAATGATTGTCCTCTGaaaaaaCACAAGACCGGCAGGAAATAAAATCATCGGTTAGCaaaaaaTCTTAGATAAGAGGATacacacCTTTATAGGGTTGATAGATCTGATCAAGATGAGCTTGAGTCACCAATCTCTGGCGACTTAtcctcctcctcctccTCTTCCAAGCCTCAGGTCCCAATCATGCCACTGGAGGTCTGGATCAGGGTTTGTCTTCtttttAACGATGGCCAATaaaaaG
	M00842:287:000000000-BGGT4:1:1108:10160:5205	1	140	18	9	1	AT	TATATATATATATATATA	NA	1	1	4	3	114	TGCTTACTTAGGTGAAGAGGCCTAGTTACTCAATAGAACAATATTTAAAACCTGCTTTTATTATCACTtatatatatatatatataTTTTCAAACTGATAAAGGGAACTTTGAA	TGCTTACTTAGGTGAAGAGGCC	TTCAAAGTTCCCTTTATCAGTTTGA	46	3	72	22	185	25	59.764	57.11	5.19	2.69	10.1263	A	230	GAAAGGCTATAGATCAAAACTAGCtatataACAAAGTTTCTTCACATCTCTACTTTTGACGTGAAACTTAATGCTTACTTAGGTGAAGAGGCCTAGTTACTCAATAGAACAATATTTAAAACCTGCTTTTATTATCACTtatatatatatatatataTTTTCAAACTGATAAAGGGAACTTTGAATTTGTTAATACCTATacacacCTAAGAAGTAGATTCTTCTTTAAT
	M00842:287:000000000-BGGT4:1:1108:10901:26832	1	137	18	9	1	AG	TCTCTCTCTCTCTCTCTC	NA	1	1	3	49	291	AAGGACCAGCATGCTCAACTCTCCCTAGTACACCACAGCTCAACCATGATAGAGCTGCTCTTCCTCCTTtctctctctctctctctcTTTCTTTCCTTCTCtttttttttGTCATTATCCCTAGGCTATCTAGTGGACAACATGGTTGTCATGGGCCTAGCCTCAACCCTCACCGAGGTCAAGGAAAGAGGGCAAAAcctcctcctcctCCGACgggggCCAAGCTCCCATTCtttttGCTTTAACTAGATAAAACATAAGGAAGAGATATGGGCTCACCTCATCAGCAAT	AAGGACCAGCATGCTCAACT	ATTGCTGATGAGGTGAGCCC	49	184	68	20	358	20	59.597	60.107	3.16	5.19	0.51009	F	467	ATTAATGGTGTCGGCACTTGCCTTTGGCAGCCACCATTGCCATTGGGGTAGCACTGGAGATCAGGAGAAGGACCAGCATGCTCAACTCTCCCTAGTACACCACAGCTCAACCATGATAGAGCTGCTCTTCCTCCTTtctctctctctctctctcTTTCTTTCCTTCTCtttttttttGTCATTATCCCTAGGCTATCTAGTGGACAACATGGTTGTCATGGGCCTAGCCTCAACCCTCACCGAGGTCAAGGAAAGAGGGCAAAAcctcctcctcctCCGACgggggCCAAGCTCCCATTCtttttGCTTTAACTAGATAAAACATAAGGAAGAGATATGGGCTCACCTCATCAGCAATGGTGAGGCTTCTGATGATGTGCATGGGTCTAGTCACAGTTG…
	M00842:287:000000000-BGGT4:1:1108:11783:7156	1	87	30	8	1.5	AG	GCGAGCGAGCGAGCGAGAGAGAGAGAGAGA	NA	1	1	3	31	198	GCTCGCGCCTAATTAGGGTTTCTCCGATTCCCCTTTCCGGCCGCCAAGCGTgcgagcgagcgaGCgagagagagagagagaGGAGTATATtgtgtgTATTAGGGTTAGGGTTCTGAAAGGTCGTTGGGGTTTCTAGGGTTCCGCCATGGCGAAGTTCAACGTGGTGGAGAAGGAGCGGCGAAAGAGGATCCAGGAGCG	GCTCGCGCCTAATTAGGGTT	CGCTCCTGGATCCTCTTTCG	31	97	36	20	233	20	60.532	60.249	4.11	3.46	0.781434	B	400	TCATATCAAGCACTGGGCAGTGGGCACCACCAGCCGCTCGCGCCTAATTAGGGTTTCTCCGATTCCCCTTTCCGGCCGCCAAGCGTgcgagcgagcgaGCgagagagagagagagaGGAGTATATtgtgtgTATTAGGGTTAGGGTTCTGAAAGGTCGTTGGGGTTTCTAGGGTTCCGCCATGGCGAAGTTCAACGTGGTGGAGAAGGAGCGGCGAAAGAGGATCCAGGAGCGGAAGCGGGCGATCCACGGCGATCCGAGCACCCGCAAGCTCAAGCAGCGCACCAACCACATTGCCATCTCCGgcaagcgcaagcgcaagcTCTTCAAGAAATGGCGAAGAGTACGAATATAACTAACTATAAATTATCTTCTCTTCCTTATTGATATGATCGAAGAAC
	M00842:287:000000000-BGGT4:1:1108:12074:3256	1	386	10	5	1	AC	GTGTGTGTGT	NA	1	1	2	47	169	TCGGCctctctGCTAGTGATAAAGCCGAGGTCATGGCGTTATGGGGTGACCCTTTAGTGGTTGTCTGCTAACCAATAGAGTATCAGCACGTGgtgtgtgtgtCATGAGTTATCATTTTCATGGTGTGCGGTGGCGGTGGATCCCGAGAGGAGTGTGGGCTCCAACGTTT	TCGGCCTCTCTGCTAGTGAT	AAACGTTGGAGCCCACACTC	72	47	294	20	462	20	60.106	60.818	3.06	3.51	0.924509	F	464	TTGGTACTTCGGGGATGCGCTTGCTCTGATGTCTCTTGCCGTTGGGTGTTGAACGCATCCTACAGCTTCTGCCAtgtgtgAGGACCGATCTCATACCATAATTGGTATATGTGGCCCTGTAtgtgtgCACGGCTTGTGGGGTATaaaaaCCCTGCATCACCCCTCCCCTCCTccccccTcccccAATTTGAGTCCGAGTCGAACTCCTTCCATTCGAGCTAAAATCTCAGCAGGAGAGCTGTGCACATTTCTCGAAAAGGAAGATCGGATCATTATTTTGTGCGATCCGATCCTCGGCctctctGCTAGTGATAAAGCCGAGGTCATGGCGTTATGGGGTGACCCTTTAGTGGTTGTCTGCTAACCAATAGAGTATCAGCACGTGgtgtgtgtgtCATG…
	M00842:287:000000000-BGGT4:1:1108:12453:25671	1	115	10	5	1	AG	CTCTCTCTCT	NA	1	1	2	40	144	TTCCACGTCAACACAGTGGATAGCTTGCTGTTTCAGACAAGAGCTCCAGCAGGGAGGTTGCCCAGACAAACGACctctctctctATCCTAATCTTCTAGGGGTGACTCAACTCCTGATTGTGAAGCAGCACCCAACCAGATGAA	TTCCACGTCAACACAGTGGA	TTCATCTGGTTGGGTGCTGC	54	40	41	20	184	20	59.462	60.895	4.02	5.25	1.43275	A	309	GATCCCTATgggggTCACTACATCTACAGTCCATATAACTTTCCACGTCAACACAGTGGATAGCTTGCTGTTTCAGACAAGAGCTCCAGCAGGGAGGTTGCCCAGACAAACGACctctctctctATCCTAATCTTCTAGGGGTGACTCAACTCCTGATTGTGAAGCAGCACCCAACCAGATGAAGAAATACGAGTGCAAGCTTCAAGAGCTTGACCAATGAGTCATTTGAATTGGAACCAATGCTCGAAAACCAATTGAATGACTTGGGGTTCACTCCCATCCACCATTTATTTGATGGATTCTTAATG
	M00842:287:000000000-BGGT4:1:1108:13300:27056	1	127	24	12	1	AG	TCTCTCTCTCTCTCTCTCTCTCTC	NA	1	1	4	5	132	GAAGTTGGTGAAGGCTGGGTAGTGATTCATCAACTCGCCCTTTCACTGCTAATCTTGGGCCAGGCCAAGTGGATGGCCCAAGAtctctctctctctctctctctctcTTATAGGTGTGAGTGGATGGCTTCA	GAAGTTGGTGAAGGCTGGGT	TGAAGCCATCCACTCACACC	63	5	44	20	175	20	60.179	59.963	4.51	4.16	0.215722	A	182	CATCCTATGGCAAAGATCATGCTATGTAGATGTGGCCACAGGTGAAGTTGGTGAAGGCTGGGTAGTGATTCATCAACTCGCCCTTTCACTGCTAATCTTGGGCCAGGCCAAGTGGATGGCCCAAGAtctctctctctctctctctctctcTTATAGGTGTGAGTGGATGGCTTCAGGTTGGG
	M00842:287:000000000-BGGT4:1:1108:13760:18548	1	285	30	5	1.5	ATGC	CATGCATGCATGCATGCATGCACACACACA	NA	1	1	3	94	290	TCTGCATGCTTGTGGTTCCATTTCTCACAGCGTTTTATGatatatCTAGATTTGTGCGCATATTATGTATCTATTTTCAtttgtttgtttgTATGTATGTATAGATTGATGGATGTATCATCTTTATGCCCTTGTCTCACAcatgcatgcatgcatgcatgcacacacacaTCATGTCAAGGCATAAGGATACTAGCTATCATTATCAATAGGATATCTATGCATTGTTaaaaaCTGTAAAGTAtttttATTCGGCCGGGGAGGTGgaagaagaaAGGAGTAGTATGGGT	TCTGCATGCTTGTGGTTCCA	ACCCATACTACTCCTTTCTTCTTCC	121	94	144	20	433	25	60.179	59.574	3.53	3.46	5.60486	F	437	CATTTTGGCTTTTGCTTGAACAGGTACATTTTCTAATTGTCATGAGACCGAATGAATTTTCTGTTCCCTTCAATTGATTTGGTTAACAATTTTACCACGTGCTTATTATACATTTAAGGCAAGCATGTTCTTTTGATGATCAATCTGCATGCTTGTGGTTCCATTTCTCACAGCGTTTTATGatatatCTAGATTTGTGCGCATATTATGTATCTATTTTCAtttgtttgtttgTATGTATGTATAGATTGATGGATGTATCATCTTTATGCCCTTGTCTCACAcatgcatgcatgcatgcatgcacacacacaTCATGTCAAGGCATAAGGATACTAGCTATCATTATCAATAGGATATCTATGCATTGTTaaaaaCTGTAAAGTAtttttATTCGGC…
	M00842:287:000000000-BGGT4:1:1108:13814:13693	1	190	32	8	1.5	AT	TATATATATATATATAGAGAGAGAGAGAGAGA	NA	1	1	5	1	238	GCTGGTAATAGAGCTACCTATTTCAtttttAGTATCGTTATGTTAGAAAAGAAAACTTAGATGCAAGCTAGCAGCCATATaaaaaaTCTaaaaaaTAATAGCAATAatatatGACCTAGAAGAAATCAAGAATAGAAGAATGAAGAACAATAATCCTGTCCTATTTACCCTTCaaaaaTTACTATTtatatatatatatatagagagagagagagagaGGCAGACAGGTAGGCTTGCA	GCTGGTAATAGAGCTACCTATTTCA	TGCAAGCCTACCTGTCTGC	161	1	4	25	241	19	58.006	60.003	2.69	4.26	7.99758	F	321	ATTGCTGGTAATAGAGCTACCTATTTCAtttttAGTATCGTTATGTTAGAAAAGAAAACTTAGATGCAAGCTAGCAGCCATATaaaaaaTCTaaaaaaTAATAGCAATAatatatGACCTAGAAGAAATCAAGAATAGAAGAATGAAGAACAATAATCCTGTCCTATTTACCCTTCaaaaaTTACTATTtatatatatatatatagagagagagagagagaGGCAGACAGGTAGGCTTGCATGCACGCATGCATCtatatatgtatgtatgtatgtaTCTGAAATCACCTTGtttttGAAATGATGTCCCTTCCACTACAT
	M00842:287:000000000-BGGT4:1:1108:14179:21568	1	156	16	8	1	AT	ATATATATATATATAT	NA	1	1	2	51	240	CATCAATTTAAGGGCTTAGCGCTGTTAATCTTTCTTCTTATCtttttacacacTTTAGGACAAAATAAAAGAAAAGGAAAGGAACAAATACAATGGGGTTATCTCAACAGTTTGAGATAAAATTAGAGCATAGATTTAGAAATAAACATTGAAatatatatatatatatTAGATCTTTTCATCTCCCATTAAATCCCATCATCTCCGCACCCTCCTCTACCGTGCCTCCATAACCAAGGA	CATCAATTTAAGGGCTTAGCGC	TCCTTGGTTATGGAGGCACG	131	51	3	22	242	20	58.368	59.748	5.92	5.34	3.8841	F	245	AACATCAATTTAAGGGCTTAGCGCTGTTAATCTTTCTTCTTATCtttttacacacTTTAGGACAAAATAAAAGAAAAGGAAAGGAACAAATACAATGGGGTTATCTCAACAGTTTGAGATAAAATTAGAGCATAGATTTAGAAATAAACATTGAAatatatatatatatatTAGATCTTTTCATCTCCCATTAAATCCCATCATCTCCGCACCCTCCTCTACCGTGCCTCCATAACCAAGGATCT
	M00842:287:000000000-BGGT4:1:1108:14818:26685	1	145	16	8	1	AG	TCTCTCTCTCTCTCTC	NA	1	1	2	7	138	CCCAATTCAAGCACCTAAACCAAATTAGGTTCTCATTTAAATTTGAATTTGATTTAAATCAAAATTTGAAACCACCCCTAACAAACCTCCCCAGAtctctctctctctctcATCCTTATCCTCTTACCCATGATGCCT	CCCAATTCAAGCACCTAAACCA	AGGCATCATGGGTAAGAGGA	73	7	50	22	187	20	59.103	57.803	3.67	3.71	5.09343	A	356	ATTTGATTCAAACTTGATACAGGCTAGGATTGGGTCCAATTGGATTGAACCCAATTCAAGCACCTAAACCAAATTAGGTTCTCATTTAAATTTGAATTTGATTTAAATCAAAATTTGAAACCACCCCTAACAAACCTCCCCAGAtctctctctctctctcATCCTTATCCTCTTACCCATGATGCCTATTAATAAGGGGTTTCTTAGTGTGGGATGTTATGGAATTTCAAgggggCATGAAGAGTGGAAAATCACCAGAAGCTGAAGAGACTTTTCTTCAGGTTTGGGAACTGAAGAGACCTTTCTTCAGTGTAGTTTGAGAACTAAAGAGACCTTTCTTGAGAAGAAAGAATGAC
	M00842:287:000000000-BGGT4:1:1108:14830:14191	1	393	18	5	1.5	AG	AGAGAGAAAGAGAGAGAG	NA	1	1	4	21	129	CGGTATAGGCCTGTGCTGTTCTATGCTAGGCTTGTACCATCACAGTAGAAGGGAGATGGgagagaGGAAAagagagAAagagagagagTGCAAgagggagggaggGAGAGGGAGATGGCCGTCTATTGG	CGGTATAGGCCTGTGCTGTT	CCAATAGACGGCCATCTCCC	50	21	323	20	451	20	59.822	59.965	3.16	4.3	0.213526	B	476	AATTCTTTATCATGTTtgtgtgCCTGTATAGCTATTTTGTCTGTGCCcacacaCCCTAATAAGGTCACGACCAAATGATAGATTCCGGCACCGATGATTTGAGTTGTTGGATGTCACCTGCTACCTGTAAATTGTTTACACAAATATTTGATATGGAGGCTCCTACCCTATGCATTGAATGGTCCaaaaaTGGATAGTTTAAAATAATACAAAACAATGCATGttttttGACCAACTCGATGCATAGGCgagagaTCTCAAATCACAGAAtttttGgtgtgtGAGTAATACAAACAAGGATCGGCTGGCTGGTGGCACGGGTCGGTATAGGCCTGTGCTGTTCTATGCTAGGCTTGTACCATCACAGTAGAAGGGAGATGGgagagaGGAAAagagagA…
	M00842:287:000000000-BGGT4:1:1108:15916:16694	1	81	12	6	1	AT	TATATATATATA	NA	1	1	3	14	99	TCATTAAGCACATTAGCCAAACAAAAGaaaaaTCTTAATTATGCACATATTtatatatatataCACACTCAAGACAATGGACTATTAGTGCCGGTTTCT	TCATTAAGCACATTAGCCAAACA	AGAAACCGGCACTAATAGTCCA	28	14	30	23	128	22	57.026	59.164	2.83	4.02	8.80966	F	163	atatatatatatatatatatatatatGATTCATTAAGCACATTAGCCAAACAAAAGaaaaaTCTTAATTATGCACATATTtatatatatataCACACTCAAGACAATGGACTATTAGTGCCGGTTTCTAGttttttttACTGGcacacaATTAATGTACCAAT
	M00842:287:000000000-BGGT4:1:1108:16572:9276	1	77	12	6	1	AG	TCTCTCTCTCTC	NA	1	1	4	13	259	tCTCTGCTATTAGGGTTTCTCCtttttttGAtttttttctctctctctcAGGGTATACGTCCCAGACCCtttttATAGAGTCTGGACATTCCCACGTGAAGAGTCTCAGACTCTTCACGCCACCTAAGAAAATGCCTATTTTGTGGGCATTTTACGTGAAGAGTCCTAGACTCTTCACGCCTCCCaaaaaGTAATGCCTCCTAAGGATGGGCACAACTCCCAAGGAATATTCCTTGGGAGTTACTTCCGATCTACCGCG	TCTCTGCTATTAGGGTTTCTCCTT	CGCGGTAGATCGGAAGTAACT	13	189	40	24	298	21	58.719	59.667	3.36	2.24	6.61431	F	298	CTCCCTAAGAACAATTCTTAGGGTTATTATTCCCCtttttCTCTGCTATTAGGGTTTCTCCtttttttGAtttttttctctctctctcAGGGTATACGTCCCAGACCCtttttATAGAGTCTGGACATTCCCACGTGAAGAGTCTCAGACTCTTCACGCCACCTAAGAAAATGCCTATTTTGTGGGCATTTTACGTGAAGAGTCCTAGACTCTTCACGCCTCCCaaaaaGTAATGCCTCCTAAGGATGGGCACAACTCCCAAGGAATATTCCTTGGGAGTTACTTCCGATCTACCGCG
	M00842:287:000000000-BGGT4:1:1108:17546:10964	1	152	18	9	1	AG	CTCTCTCTCTCTCTCTCT	NA	1	1	3	63	251	CCGAGTTCCAACCGAAGCAGCCCAGCGCCCTTACCTAGCTACATGCACGGGTTCCTCCCAGATCCCCATGTCTCAGACCACCATGCCAACAACTCTCCTAGCTTCATGCACAAGCTCGGATGAGACCCAGCTAATGAACTCACCTCTGAActctctctctctctctctTTCTCTTGGTCCCCTGCACCAAATGGCTTCTGGGTTCTCCACAACTTGAACCCCTCGTGCCAATGTCTTTGGCCACACGTAGT	CCGAGTTCCAACCGAAGCA	ACTACGTGTGGCCAAAGACA	131	63	2	19	252	20	60.301	59.533	3.91	3.41	1.76794	A	271	CCCGAGTTCCAACCGAAGCAGCCCAGCGCCCTTACCTAGCTACATGCACGGGTTCCTCCCAGATCCCCATGTCTCAGACCACCATGCCAACAACTCTCCTAGCTTCATGCACAAGCTCGGATGAGACCCAGCTAATGAACTCACCTCTGAActctctctctctctctctTTCTCTTGGTCCCCTGCACCAAATGGCTTCTGGGTTCTCCACAACTTGAACCCCTCGTGCCAATGTCTTTGGCCACACGTAGTTCTCTAGGTTCTCAACACC
	M00842:287:000000000-BGGT4:1:1108:17794:12883	1	169	16	8	1	AG	TCTCTCTCTCTCTCTC	NA	1	1	3	0	91	CGAGATCGCCGAGGATGAAATGCTCAGACTCACGGCCTACTGCACTGAGCTCGAtctctctctctctctcAGCCATATTAAGCTTGGTccc	CGAGATCGCCGAGGATGAAA	GGGACCAAGCTTAATATGGCT	34	0	115	20	205	21	59.969	57.77	2.69	4.75	3.26047	F	219	CTCTTGAGCTTCCCATGAAGCTCTCCTGAACACTTCCAAGCTCTCCAGTATCCTTCTGATCCTCCGAGCATAAGATGAAACGACTTCCCAAGCTGACTTTGGGCACCTAGAGATCGAGATCGCCGAGGATGAAATGCTCAGACTCACGGCCTACTGCACTGAGCTCGAtctctctctctctctcAGCCATATTAAGCTTGGTcccccAACCTTATTGGA
	M00842:287:000000000-BGGT4:1:1108:17808:22018	1	40	24	12	1	AG	GAGAGAGAGAGAGAGAGAGAGAGA	NA	1	1	3	11	91	TCTGGCGTGCACGAAATCTATGAGCAAGAATgagagagagagagagagagagagaGCCATTGATGATAATAGGGAGGGTTCTGCCTGGATG	TCTGGCGTGCACGAAATCTA	CATCCAGGCAGAACCCTCC	11	17	9	20	99	19	59.755	59.774	1.98	4.3	1.47097	A	277	GGCAACCCTCTGGCGTGCACGAAATCTATGAGCAAGAATgagagagagagagagagagagagaGCCATTGATGATAATAGGGAGGGTTCTGCCTGGATGAATAAAACATAGAAagagagagagTGTGTTCTTctccctccctccTTTCTTTATTCCCTCCGAAACAccccccccccccccccccccccccccAGCCGATCCAATGGCCGGGGTCCCGTGTCGTAcccccTTGTGAATGTGAGGGAACATGAGGGGTTGAGATCAGCCCCTCACAATA
	M00842:287:000000000-BGGT4:1:1108:17981:19278	1	229	33	6	2	AG	CTCTCTCTCTCTTCGTCGCCGCTCTCTCTCTCT	NA	1	1	3	26	241	CCTGGTCCAACACGAGCATAGCCCAGGGTGGTCTGATGTAGGGGTGATTTACGGAGCGGAAGtttttAGGATGCTTACGATGTCTCCAAAATCATGCGAAGTGTGGGGCTCAGTAGGGTGTCTAGAAAGAAGGGGAAGCCGAACGGACATTCAGCTCCCTTCctctctctctctTCGTCGCCGctctctctctctTTccccccTTTCGTTCGAGTGGGATTTGTTGCCGATTGTCAGAGCT	CCTGGTCCAACACGAGCATA	AGCTCTGACAATCGGCAACA	142	26	67	20	307	20	59.751	59.965	3.14	3.33	0.284437	G	435	GTTCTCACTGGGCCAGCCCACAGGGCCCGGCCTAGTGGAAAATGCATCAGGCTAGCCTCGGCGCATCCTGGTCCAACACGAGCATAGCCCAGGGTGGTCTGATGTAGGGGTGATTTACGGAGCGGAAGtttttAGGATGCTTACGATGTCTCCAAAATCATGCGAAGTGTGGGGCTCAGTAGGGTGTCTAGAAAGAAGGGGAAGCCGAACGGACATTCAGCTCCCTTCctctctctctctTCGTCGCCGctctctctctctTTccccccTTTCGTTCGAGTGGGATTTGTTGCCGATTGTCAGAGCTCGTCGTCACTGGTAAACGTTGAGCTGAGGTAAGGTATTCAACCGTGTACTCACTATTTCTTTGAGTTTTAGGCCGGACGACGGAGGTTCGGT…
	M00842:287:000000000-BGGT4:1:1108:18293:12342	1	57	15	5	1	AAG	AGAAGAAGAAGAAGA	NA	1	1	8	30	218	AGCAGTGTGGTGGTCATGATAatatatagtagtagtGTAGTCATCAAGGTagaagaagaagaagaGTGGAATCCACCACTTGGAATTATTAATGCTACCTCCTTGCCTaaaaaCTAGAGAATTCTCATGCTAGTTTGATTCAAACAAGCTAATCATAATATTTTCTACATATTTAAAATAAGaaaaaGCAACTAGAGGCACCTCTTGCGCAATAGGAA	AGCAGTGTGGTGGTCATGAT	TTCCTATTGCGCAAGAGGTG	30	133	7	20	224	20	59.305	58.262	2.45	4	2.43261	F	241	CATAGTAGCAGTGTGGTGGTCATGATAatatatagtagtagtGTAGTCATCAAGGTagaagaagaagaagaGTGGAATCCACCACTTGGAATTATTAATGCTACCTCCTTGCCTaaaaaCTAGAGAATTCTCATGCTAGTTTGATTCAAACAAGCTAATCATAATATTTTCTACATATTTAAAATAAGaaaaaGCAACTAGAGGCACCTCTTGCGCAATAGGAATCCAGATCAAGTCAAAA
	M00842:287:000000000-BGGT4:1:1108:18506:15877	1	227	22	11	1	AG	TCTCTCTCTCTCTCTCTCTCTC	NA	1	1	5	1	105	TGTGCAACCTCTATCGTTCGATCTAGACCTGACTCAATTGAGTAGCTATCCACTCGAGCAtctctctctctctctctctctcTACATGCACGCAAACACatatat	TGTGCAACCTCTATCGTTCG	ATATATGTGTTTGCGTGCATGT	40	1	167	20	271	22	58.009	57.101	3.95	3.21	6.88963	F	272	CAATCACAAAGTTGGAGACCTCTAGCCTATGCATCAAGTGGGCaaaaaaaTGATACATTTCtttttATCTAGTTGATGGATATGCTgggggTCTCTAAATCACATGATTTAGGgtgtgtAAATAGTTTAGAGCTAGTAAACTACATCCAACAACTCAGATTATTAATGTGCAACCTCTATCGTTCGATCTAGACCTGACTCAATTGAGTAGCTATCCACTCGAGCAtctctctctctctctctctctcTACATGCACGCAAACACatatatA
	M00842:287:000000000-BGGT4:1:1108:19194:4114	1	43	18	9	1	AG	CTCTCTCTCTCTCTCTCT	NA	1	1	4	8	197	AGCATCACAACTATCTAATCCACCTTCAACCCCctctctctctctctctctCCCCTCCACCTACTAGCAAAACTTAGGTTTAAACCTACATTATGCGATACAATCaaaaaTATATTAGGGTAGATGACAAAACAACATAGATATTTTAAGATGCACATATCATATTGTAGAATACTGAACAACTCTCGATAGCTACC	AGCATCACAACTATCTAATCCACCT	GGTAGCTATCGAGAGTTGTTCAGT	8	122	10	25	206	24	59.632	59.903	4	3.41	9.46462	F	215	TTCTAGGGTAGCATCACAACTATCTAATCCACCTTCAACCCCctctctctctctctctctCCCCTCCACCTACTAGCAAAACTTAGGTTTAAACCTACATTATGCGATACAATCaaaaaTATATTAGGGTAGATGACAAAACAACATAGATATTTTAAGATGCACATATCATATTGTAGAATACTGAACAACTCTCGATAGCTACCATCAAAATA
	M00842:287:000000000-BGGT4:1:1108:19268:15023	1	52	10	5	1	AT	ATATATATAT	NA	1	1	1	22	244	ACTCCATAAtctctctcTAATCAGCaaaaaTGAAGACCAACAATCTCatatatatatGACTACAATGTCCATTGATTTACACCATTTAGGCAAAGATGaaaaaGAAAACTGAAGGTACCAtagtagtagTCGAAGCCTTAAAATAGCAATACTGGTTTGGAAGAGATACAAAGACACAAGTCCTATGCCACCAAACCCATATAATTGCACCGAAAACTTTGGTGGATCTATCTGATAGAAAGTG	ACTCCATAATCTCTCTCTAATCAGC	CACTTTCTATCAGATAGATCCACCA	22	162	5	25	248	25	57.533	57.705	4.26	4.17	14.7621	F	299	TACTACTCCATAAtctctctcTAATCAGCaaaaaTGAAGACCAACAATCTCatatatatatGACTACAATGTCCATTGATTTACACCATTTAGGCAAAGATGaaaaaGAAAACTGAAGGTACCAtagtagtagTCGAAGCCTTAAAATAGCAATACTGGTTTGGAAGAGATACAAAGACACAAGTCCTATGCCACCAAACCCATATAATTGCACCGAAAACTTTGGTGGATCTATCTGATAGAAAGTGATAGCTCTGTTACCACAAGCAAACaaaaaaaGGaaaaaGaaaaaaGaaaaa
	M00842:287:000000000-BGGT4:1:1108:19512:10485	1	241	16	8	1	AG	GAGAGAGAGAGAGAGA	NA	1	1	2	62	265	GCCCGATGAACTTGTTGCTCCATTGTTACAAATTGTTAGATTTCCTTCATGGTTCTCCTAATTGTTTTCCCtttttttGaaaaaaTAGTTATATGGTAAAATAGTTGAACATGATGTGCATGATACCAATATCAGTTACCTCATAAATATTTCTAttttttCTTTTgagagagagagagagaAAGAAAGAATACAAGTGTAATAGCCCAATTCTTTGAGCTACGTACAAGCCTGAGAGGCTAGGGCCGTTAGGTTTAAGTGTGCC	GCCCGATGAACTTGTTGCTC	GGCACACTTAAACCTAACGGC	146	62	75	20	339	21	59.831	59.802	4.26	5.68	1.36742	F	440	CTATAATTTAGCAGTCTTTAGGAATTAGGAAGAAACTTATTGCCAAGTAAGCAtttttATAAAgatgatgatATGCCCGATGAACTTGTTGCTCCATTGTTACAAATTGTTAGATTTCCTTCATGGTTCTCCTAATTGTTTTCCCtttttttGaaaaaaTAGTTATATGGTAAAATAGTTGAACATGATGTGCATGATACCAATATCAGTTACCTCATAAATATTTCTAttttttCTTTTgagagagagagagagaAAGAAAGAATACAAGTGTAATAGCCCAATTCTTTGAGCTACGTACAAGCCTGAGAGGCTAGGGCCGTTAGGTTTAAGTGTGCCCTATTGCACATAGGTGGAGGagaagaagaCTCCAATTCTAACGGAATGAGACACTTGTAA…
	M00842:287:000000000-BGGT4:1:1108:20072:22604	1	39	21	7	1.5	AG	GAGAGAAAGAGAGAGAGAGAG	NA	1	1	4	9	106	GATCATCCTCCTCTGGCTGCTGAACAAACgagagaAagagagagagagagATAAAACCGAAAGGAGGAGTCGGGATCTCACCAAATTTTGAGGAGCTCACCAGAGA	GATCATCCTCCTCTGGCTGC	TCTCTGGTGAGCTCCTCAAA	9	36	10	20	115	20	59.965	57.985	5.25	2.69	2.05063	B	242	ATAAGAGGAGATCATCCTCCTCTGGCTGCTGAACAAACgagagaAagagagagagagagATAAAACCGAAAGGAGGAGTCGGGATCTCACCAAATTTTGAGGAGCTCACCAGAGAAAAGCCCCAAGCCTCGCCGCCGGCGCCACCGGAGCCAAGGTAAGAACCCTTCTCTTCTCTAATTTGATTTGGTGGCCTAATCATAGCCAACCCCATCCGGTTGCTGCCACCATCACCACCCAAACAC
	M00842:287:000000000-BGGT4:1:1108:20165:9491	1	183	22	11	1	AG	GAGAGAGAGAGAGAGAGAGAGA	NA	1	1	2	62	261	AGAAACATGCAGTGCTTTCCGATTACACTTACCAAAGCTGTGACTGTGGCACATCCGGCCCTCATTCCCTCCTTTCCCTGCCCTTCTCCTTGTATAGTtatataCCAGCCTCCCTTCCGACCAACctctctTGCTCATTTGATCATCtttttGTAGCTGgagagagagagagagagagagaTGGGACAGCAGTCGCAGTTCGGGGACACGACGCTGACGAAGGtttttGTggggggTCTGGCGTGGGAGACGCaggaggag	AGAAACATGCAGTGCTTTCCG	CTCCTCCTGCGTCTCCCA	138	62	24	21	284	18	59.732	60.363	4.3	4.37	3.63082	F	286	AGCAACAATTAAAGTTAGAATTCAGAAACATGCAGTGCTTTCCGATTACACTTACCAAAGCTGTGACTGTGGCACATCCGGCCCTCATTCCCTCCTTTCCCTGCCCTTCTCCTTGTATAGTtatataCCAGCCTCCCTTCCGACCAACctctctTGCTCATTTGATCATCtttttGTAGCTGgagagagagagagagagagagaTGGGACAGCAGTCGCAGTTCGGGGACACGACGCTGACGAAGGtttttGTggggggTCTGGCGTGGGAGACGCaggaggaggC
	M00842:287:000000000-BGGT4:1:1108:20701:2424	1	189	21	7	1	AGG	TCCTCCTCCTCCTCCTCCTCC	NA	1	1	2	66	265	cacaCTTAACATTAATTGCAGCACATAATTGTTAAGAATTAGTTGaaaaaTCCAATCTcccccccccccTGGGTTATCTAGCTAGGCAACAtcttcttctTCctctctCCTGGTTTCctctctTGGAttcttcttcctctctCCCAGATTCCTTCTCTtcctcctcctcctcctcctccTCTCTAGTCTtctctctcCTtctctcCTTCTATCTATTTCTtctctctcCCTCTTATATCAATCAAACCTTCCTCTCCTAAGCCCA	CACACTTAACATTAATTGCAGCACA	TGGGCTTAGGAGAGGAAGGT	133	66	31	25	295	20	59.08	59.582	4.57	3.5	6.33755	F	297	CTGTTGcattcattcattTGAATAACATcacacaCTTAACATTAATTGCAGCACATAATTGTTAAGAATTAGTTGaaaaaTCCAATCTcccccccccccTGGGTTATCTAGCTAGGCAACAtcttcttctTCctctctCCTGGTTTCctctctTGGAttcttcttcctctctCCCAGATTCCTTCTCTtcctcctcctcctcctcctccTCTCTAGTCTtctctctcCTtctctcCTTCTATCTATTTCTtctctctcCCTCTTATATCAATCAAACCTTCCTCTCCTAAGCCCAGT
	M00842:287:000000000-BGGT4:1:1108:20776:4070	1	201	10	5	1	AG	AGAGAGAGAG	NA	1	1	4	7	135	CAGGCGAACGATCTTGAACAATGGCCTCAAAAGTAGCTACTTCAAGCATGACATTTACACGAGTTGGTGCACCCTACATAAGGACCAATGTTTAATagagagagagTGGTTTAGGAAACTACTCTTCCCTCTCCC	CAGGCGAACGATCTTGAACA	GGGAGAGGGAAGAGTAGTTTCC	76	7	105	20	239	22	58.572	59.233	3.18	3.13	4.19584	A	264	AATGCTTAATTTCCTATCCTAATCTGTTATGGATCAACTAGGAACAATACAAGAGGCCACATGAGGAAGACCATGGTAAATCTAGACAGCATGGTTGAATTAATCAGGCGAACGATCTTGAACAATGGCCTCAAAAGTAGCTACTTCAAGCATGACATTTACACGAGTTGGTGCACCCTACATAAGGACCAATGTTTAATagagagagagTGGTTTAGGAAACTACTCTTCCCTCTCCCCACGCACTTATCCCCTGTACATCCC
	M00842:287:000000000-BGGT4:1:1108:20959:8599	1	171	20	10	1	AG	AGAGAGAGAGAGAGAGAGAG	NA	1	1	5	107	293	ACATGTACTTAGGACAGTCTAAAGTTAAACATTTATATTACATTCATAGGAAAGACACATATAAAGAAAATTGATTTTCATTaaaaaGGTCGATTACATAGAACCCCAAAATACATCTCTAATGCAGTAAAAagagagagagagagagagagAAAGAAATAGCACAAGTTACTTAGAAGAAGGAATTTTGGTTGAAGCCTTCACAGACGAACTCTCCTTTACATCGGATGAAGCCTGATCGGTTTTAGCTAAAGTATCTGGAGCTTCACTGATATTGACCGGGCTAACCTCTG	ACATGTACTTAGGACAGTCTAAAGT	CAGAGGTTAGCCCGGTCAAT	107	121	39	25	331	20	57.222	59.458	2.66	2.57	8.32005	F	356	ATTATACCTTAATAAAATAACAACCTAAGTTATAATATACATGTACTTAGGACAGTCTAAAGTTAAACATTTATATTACATTCATAGGAAAGACACATATAAAGAAAATTGATTTTCATTaaaaaGGTCGATTACATAGAACCCCAAAATACATCTCTAATGCAGTAAAAagagagagagagagagagagAAAGAAATAGCACAAGTTACTTAGAAGAAGGAATTTTGGTTGAAGCCTTCACAGACGAACTCTCCTTTACATCGGATGAAGCCTGATCGGTTTTAGCTAAAGTATCTGGAGCTTCACTGATATTGACCGGGCTAACCTCTGGAGGTTTTAGGACTTGAGATAAGAG
	M00842:287:000000000-BGGT4:1:1108:21083:7071	1	110	52	22	1.5	AG	CTCTCTCTCTCTCTCTCTCTCTCTCTCTCTCTCTCTCTCTCTCTCCCTCTCT	NA	1	1	3	87	290	TCGGAAGAGCAAATTGTGACAAATGGAAAGGGCACTACCAAAACCTTCAAGTACACAAAATTGCGAGAATAGTATAATCGaaaaaaGACAATACATATTCTTACATCCctctctctctctctctctctctctctctctctctctctctctctCCctctctCACCATTTATTGCATTTCACttttttttCACCTTTTATACTGGCAATTGCAAATCaaaaaCAtttttAAAACACCCACTAATCATTACCAGCTAGCAACAAAACAATTGGCGGCATGCTAGTGTAGAGCA	TCGGAAGAGCAAATTGTGACA	TGCTCTACACTAGCATGCCG	87	110	2	21	291	20	58.155	59.897	3.58	5.69	2.94797	F	293	ATCGGAAGAGCAAATTGTGACAAATGGAAAGGGCACTACCAAAACCTTCAAGTACACAAAATTGCGAGAATAGTATAATCGaaaaaaGACAATACATATTCTTACATCCctctctctctctctctctctctctctctctctctctctctctctCCctctctCACCATTTATTGCATTTCACttttttttCACCTTTTATACTGGCAATTGCAAATCaaaaaCAtttttAAAACACCCACTAATCATTACCAGCTAGCAACAAAACAATTGGCGGCATGCTAGTGTAGAGCAGA
	M00842:287:000000000-BGGT4:1:1108:23373:25864	1	328	14	7	1	AG	TCTCTCTCTCTCTC	NA	1	1	5	18	297	ACTCTCGTCATGGTACGAGGTAATCCTAATCTCTATTTTAtttttAATAGGAAATTCATCTTCACCATGACCAGCAGCCCCTGCCGTTGTCGGCCTTGCCTCCCAAGGTcaccaccacCTTGGGCAGATACTGCCACACCGGCCAAAGGGTTCccaccaccaACTAGGCTGCCATGCACAAAGACGAGaaaaaGAGAAgggggAAGGAGGAAGGGAagagagGAGGGAAGAAAGAGGAGAGTTGGGtctctctctctctcACTCTCGctctctCCCTCCCTTGCTTGCCCGATCTCA	ACTCTCGTCATGGTACGAGGT	TGAGATCGGGCAAGCAAGG	225	18	82	21	378	19	60.34	60.078	3.85	3.61	2.41804	F	407	atatatGGAAGGATTGTAGGCCaaaaaCCCATCTCGTAGACTCTAGATACGCTTCTGCAGCATACTCCCTTTTGGATTTAAACTCTCGTCATGGTACGAGGTAATCCTAATCTCTATTTTAtttttAATAGGAAATTCATCTTCACCATGACCAGCAGCCCCTGCCGTTGTCGGCCTTGCCTCCCAAGGTcaccaccacCTTGGGCAGATACTGCCACACCGGCCAAAGGGTTCccaccaccaACTAGGCTGCCATGCACAAAGACGAGaaaaaGAGAAgggggAAGGAGGAAGGGAagagagGAGGGAAGAAAGAGGAGAGTTGGGtctctctctctctcACTCTCGctctctCCCTCCCTTGCTTGCCCGATCTCACCCTCTCCTActctctTGTTG…
	M00842:287:000000000-BGGT4:1:1108:24420:9611	1	138	20	10	1	AG	CTCTCTCTCTCTCTCTCTCT	NA	1	1	3	12	290	GTTCAACCTATCAATAGCTATGGGCCCTAAGGGATTGctctctctctctctctctctTCTTTTAGTAATTATGAAGGTAAAGAAAtttttAGTTGTTCGTGTTATTTTACACTTCTATGCAGATCGATCTTGAAAGTTTTGGATTCATAAGCCTACTCATCTTACAAATATTTGAAGGTATAGTATTTTCATTCTTGCTTTCATTCTCTTAAGAAATTTTAAatatatctcctcctcTTTCAATAAttttttGAGAAAAGGATAGGAACTATCCCTACCAACCACTTAGA	GTTCAACCTATCAATAGCTATGGGC	TCTAAGTGGTTGGTAGGGATAGT	12	210	101	25	390	23	59.587	57.783	5.36	2.12	10.6296	F	404	AGAAGAAATTCAGAAAACaaaaaGTaaaaaTCCTCaaaaaGAAAGTTTGATCCAGTCTAGTAGAAAGCAAGCaaaaaGGTTATTGCTTGGAGaaaaaaGTGTTCAACCTATCAATAGCTATGGGCCCTAAGGGATTGctctctctctctctctctctTCTTTTAGTAATTATGAAGGTAAAGAAAtttttAGTTGTTCGTGTTATTTTACACTTCTATGCAGATCGATCTTGAAAGTTTTGGATTCATAAGCCTACTCATCTTACAAATATTTGAAGGTATAGTATTTTCATTCTTGCTTTCATTCTCTTAAGAAATTTTAAatatatctcctcctcTTTCAATAAttttttGAGAAAAGGATAGGAACTATCCCTACCAACCACTTAGATATAATTAG…
	M00842:287:000000000-BGGT4:1:1108:24761:17272	1	197	15	5	1	AGG	CTCCTCCTCCTCCTC	NA	1	1	4	55	192	TCACCATTTCGATACCCGCCATGGTGGCCTCCACGAAAGGGTGGACATGGATCATGGTCCCTCTCAGGAAGCCAGCTAGTGTCACCTTCCTCCCTCCAAGTActcctcctcctcctcCACCTCCTTCACCACCATAGCCCTTTGAAAATCCATTGGCGTTCCCATTTCCAATACGATTTGTGCCCATCCCAT	TCACCATTTCGATACCCGCC	ATGGGATGGGCACAAATCGT	82	55	95	20	286	20	60.179	60.033	6.13	3.73	0.212275	A	288	CCCTGATCCCTCGCATTTGATCTTGTACCCATGGCCTGTGCCACTGTGTCGCTCATACATCCTGCATggggggCGTTCAGAGTCACCTCCGGCATCACCATTTCGATACCCGCCATGGTGGCCTCCACGAAAGGGTGGACATGGATCATGGTCCCTCTCAGGAAGCCAGCTAGTGTCACCTTCCTCCCTCCAAGTActcctcctcctcctcCACCTCCTTCACCACCATAGCCCTTTGAAAATCCATTGGCGTTCCCATTTCCAATACGATTTGTGCCCATCCCATCT
	M00842:287:000000000-BGGT4:1:1108:26492:7202	1	218	10	5	1	AT	TATATATATA	NA	1	1	2	17	192	ATAGGTCAGTTCCTGCAGGCCTCATGCAAACTTCGTGGGTGGACCCCATAAtttttGCATGGTCGGGTGTTGTGGGCCCGAGGTGCGGGTCAAGGGGCATGACAACATCAGCCGTGACAGCATCAGCCCAAATAATGGGAGTTGGtatatatataCATTTATGCACTACCAAGTGGCTAACATGGAGAGTGC	ATAGGTCAGTTCCTGCAGGC	GCACTCTCCATGTTAGCCAC	125	17	73	20	264	20	59.456	58.626	4.85	5.01	1.91732	F	264	GACCGGATAAAATAAACATCATTATTTTCTTTTATATTTTGTATTTTATtatataTTATTATATTAtttttAATAGGTCAGTTCCTGCAGGCCTCATGCAAACTTCGTGGGTGGACCCCATAAtttttGCATGGTCGGGTGTTGTGGGCCCGAGGTGCGGGTCAAGGGGCATGACAACATCAGCCGTGACAGCATCAGCCCAAATAATGGGAGTTGGtatatatataCATTTATGCACTACCAAGTGGCTAACATGGAGAGTGC
	M00842:287:000000000-BGGT4:1:1108:26721:19653	1	164	10	5	1	AG	AGAGAGAGAG	NA	1	1	3	8	172	GTTTGGAGCACCATGCCATCCAGATTAGTAATATGTCAACAAAATTTCACCGGCTGttttttttgggggTAGAggggggATGATTTAATATAGCTCTTCCCCTGGTGATACACAAattcattcattcaaaaaaagagagagagATATTCAAGGCTTGCAAGAAACAAGGTCt	GTTTGGAGCACCATGCCATC	AGACCTTGTTTCTTGCAAGCC	113	8	31	20	202	21	59.826	59.317	3.51	4.35	1.85755	F	303	AGGAGGTGCCTAAAGCACTAAAATAAATGAGTTTGGAGCACCATGCCATCCAGATTAGTAATATGTCAACAAAATTTCACCGGCTGttttttttgggggTAGAggggggATGATTTAATATAGCTCTTCCCCTGGTGATACACAAattcattcattcaaaaaaagagagagagATATTCAAGGCTTGCAAGAAACAAGGTCttttttGCTTGAAAATGTACCAAAGGCAAAGAAAGAAAATGAAATTACCACAAAAGGATTTCTGACTGTGATTAAAATATTACGCTCAGCCAATATACGCTC
	M00842:287:000000000-BGGT4:1:1108:26982:14632	1	70	15	5	1	AAG	TTCTTCTTCTTCTTC	NA	1	1	5	41	142	ATGATGCCGGGATCAGTTCGTCGTGCCGCCTTGGTAGGGTTCCTCCttttttttACCTTCTttcttcttcttcttcTCTTCTCTTCttttttttttGACCCCGAAGGGTGTGGGTTGTGCAGGCATGCGGCTGATGGCTGAA	ATGATGCCGGGATCAGTTCG	TTCAGCCATCAGCCGCATG	41	47	9	20	150	19	60.25	61.117	3.95	4.06	2.36657	F	283	CAGTTTGTATGATGCCGGGATCAGTTCGTCGTGCCGCCTTGGTAGGGTTCCTCCttttttttACCTTCTttcttcttcttcttcTCTTCTCTTCttttttttttGACCCCGAAGGGTGTGGGTTGTGCAGGCATGCGGCTGATGGCTGAACGGGCCCGAGAGGTGGCaaaaaaaaGGGCAGTGACGAAGCGCCCTGCTCAGGACCCGGCAGGTGCTGGGACAAGTAGGCGCAAGAGGCCGTGCCGGGATGAGGCCAAGGCACAACGCACTGCTGAAGAAGTTC
	M00842:287:000000000-BGGT4:1:1108:3384:8744	1	41	60	21	1.5	AC	CACACACACACACACACACACACACACACACACACACACACAGAGAGAGAGAGAGAGAGA	NA	1	1	3	15	167	AGGCCCATAGTTGCTGGATTCCATTTAAACTCTATCcacacacacacacacacacacacacacacacacacacacacagagagagagagagagagaGTCCACCTGAGGCCTATTAACTTCAAGGTTTAACCAAAGTCCAACAATCAAACCAGAACACCCATGAGGAG	AGGCCCATAGTTGCTGGATTC	CTCCTCATGGGTGTTCTGGT	15	51	5	21	171	20	60.134	59.013	2.52	4	2.12096	B	320	AATTAGGCCCATAGTTGCTGGATTCCATTTAAACTCTATCcacacacacacacacacacacacacacacacacacacacacagagagagagagagagagaGTCCACCTGAGGCCTATTAACTTCAAGGTTTAACCAAAGTCCAACAATCAAACCAGAACACCCATGAGGAGaaaaaaaaGAGCACAATCATATaaaaaaaaCTaaaaaaaTAGTATCAACATCCATATAGCCTATCTTTGTCAGAacacacTGCAAACATTTGATCATCCTGAAATATCAAGATACCATGCATGGCATATTCTCATGCACCATCCAAGAA
	M00842:287:000000000-BGGT4:1:1108:3820:17610	1	70	10	5	1	AT	TATATATATA	NA	1	1	2	30	193	TCTCCTTAGTTCCAGGCGATTATATCCTACACAGCATGCACCACAGTAGCtatatatataGAACCAACaaaaaGGAGATAAGGTAAGTAGCATGGTTCATAGCtatataGTGCATGCAGTGTAGGCATAATTACTTTTAATTTCATCCTTGCCTTCAACTCCTTTTATCTTTGGTTACTAAACATGGCCTTGC	TCTCCTTAGTTCCAGGCGAT	GCAAGGCCATGTTTAGTAACCA	30	111	20	20	212	22	57.839	59.177	4.58	3.67	4.98387	F	238	GAGGTCATAGCTCGTACTATCTCCTTAGTTCCAGGCGATTATATCCTACACAGCATGCACCACAGTAGCtatatatataGAACCAACaaaaaGGAGATAAGGTAAGTAGCATGGTTCATAGCtatataGTGCATGCAGTGTAGGCATAATTACTTTTAATTTCATCCTTGCCTTCAACTCCTTTTATCTTTGGTTACTAAACATGGCCTTGCAAAAGAAAACttttttGATTCAAACA
	M00842:287:000000000-BGGT4:1:1108:3863:15122	1	34	69	12	1.5	AT	TACATACATACATATACATACATACATACATACATACATACATACATATATATATATATATATATATAT	NA	1	1	9	4	229	cacacATACGTACATACATTATGCATACGtacatacatacaTatacatacatacatacatacatacatacatacatatatatatatatatatatatatAATAAGCTTAAAGTATGTATTTGTAAATATTCAAatatatGTTAGCTCAAATTTTGTATtatataACTTCAAGTTCtatataTTGTGGGTCTTTCACCTATTGGTATGCTAGATCAAATGAGATTGAGGGA	CACACATACGTACATACATTATGCA	TCCCTCAATCTCATTTGATCTAGCA	4	106	5	25	233	25	57.599	59.632	3.96	3.49	12.7691	F	290	TacacacacATACGTACATACATTATGCATACGtacatacatacaTatacatacatacatacatacatacatacatacatatatatatatatatatatatatAATAAGCTTAAAGTATGTATTTGTAAATATTCAAatatatGTTAGCTCAAATTTTGTATtatataACTTCAAGTTCtatataTTGTGGGTCTTTCACCTATTGGTATGCTAGATCAAATGAGATTGAGGGAATGTTGATGTGGCTGAACTCCTATTTGTGATATGTACGTACTTGCAAAGAAGTCCTC
	M00842:287:000000000-BGGT4:1:1108:4107:14794	1	303	10	5	1	AT	ATATATATAT	NA	1	1	3	1	181	ACAAgtggtggtgATTAGACACAATATAATGCATAGTTATGCTAATCTCTTTTCTAGTTATAGAATCGTGGTTGGATCCTCTTTTGCTTGCTATATGTATATTTTAATAAATTTGCACTGCATAAAATCATAGACCTATCTTTTGATTAatatatatatTCTACGTTAGCTGCTCTTCCGA	ACAAGTGGTGGTGATTAGACACA	TCGGAAGAGCAGCTAACGTAG	126	1	154	23	334	21	59.864	59.599	3.72	3.51	4.53656	F	337	GTCAGCTATCTTCCACTCTGGAACATGGTGGTGCCTAGTTTGATCACAATATCAAATTACCTaaaaaaaGTACCAGCTGTTAGGAGTAAGAACTGTCCATCCTAGGAAATACAAACTTCCAACCTATCCTGCTAGAAGCAATTAACTAGTTATACAAgtggtggtgATTAGACACAATATAATGCATAGTTATGCTAATCTCTTTTCTAGTTATAGAATCGTGGTTGGATCCTCTTTTGCTTGCTATATGTATATTTTAATAAATTTGCACTGCATAAAATCATAGACCTATCTTTTGATTAatatatatatTCTACGTTAGCTGCTCTTCCGATCT
	M00842:287:000000000-BGGT4:1:1108:4871:10170	1	120	10	5	1	AT	TATATATATA	NA	1	1	3	6	126	ACTTCAAAGGAACCGCGTCACATTagaagaagaCACGAACGTTTACTGTAATTTAATATCTTGGTTTGGTACTAAAACTCGCTaaaaaaTTGtatatatataATGGCACAGCCAGTCACAGCGCAC	ACTTCAAAGGAACCGCGTCA	GTGCGCTGTGACTGGCTG	72	6	28	20	153	18	60.179	61.72	4.35	4.85	3.89926	F	203	GCTCGGTAAATCAAGCATCAAACATCAACTTCAAAGGAACCGCGTCACATTagaagaagaCACGAACGTTTACTGTAATTTAATATCTTGGTTTGGTACTAAAACTCGCTaaaaaaTTGtatatatataATGGCACAGCCAGTCACAGCGCACCGTGCAAAATATGTTaaaaaaTTACACATAATGGCACAGTTAACTTGTTG
	M00842:287:000000000-BGGT4:1:1108:5181:8420	1	218	16	8	1	AG	CTCTCTCTCTCTCTCT	NA	1	1	1	45	291	GGTGATGATCGTGAGGCAGTCCATATTCCTAACCACAAATTTACAGTAAATGTTGTAAGAAATCTCAGCCAGAAGACCCATTGGCGTATTAAGACTCATCTTGCAATCAGCCACTTGGATGTTAGCAAAATAAATGTGAGGACAATTCTGCCGATTATGTCTTTCAGTGAATACTTCTTGTTTCATTGAAATTCTGGCTTTTATGCTTCCctctctctctctctctCAAATATGAAACCTTCACATGCCTTTTGGAGCAGAATATAGTTGCCGATATGCGGAAGGTCTTGG	GGTGATGATCGTGAGGCAGT	CCAAGACCTTCCGCATATCG	190	45	8	20	298	20	59.823	58.498	4.4	2.92	1.67891	A	369	TATAAGAGGTGATGATCGTGAGGCAGTCCATATTCCTAACCACAAATTTACAGTAAATGTTGTAAGAAATCTCAGCCAGAAGACCCATTGGCGTATTAAGACTCATCTTGCAATCAGCCACTTGGATGTTAGCAAAATAAATGTGAGGACAATTCTGCCGATTATGTCTTTCAGTGAATACTTCTTGTTTCATTGAAATTCTGGCTTTTATGCTTCCctctctctctctctctCAAATATGAAACCTTCACATGCCTTTTGGAGCAGAATATAGTTGCCGATATGCGGAAGGTCTTGGCaaaaaaTCCCCAAATAGAGCAGCAAAGGTTGCATAGAAGAGTGTTCCTGGAAAATATCAACCCTGAAAAT
	M00842:287:000000000-BGGT4:1:1108:6063:9066	1	127	10	5	1	AG	TCTCTCTCTC	NA	1	1	2	10	105	GGACTTGGATGCAATCGAGGAAGACAACTTtctctctctcAGGAAGTCAAGGAAATAGGAAGATGAAAGAAAGCCAAAATGTTAGACTTCCAGTTCAAATAGCCT	GGACTTGGATGCAATCGAGG	AGGCTATTTGAACTGGAAGTCT	10	43	97	20	201	22	58.697	57.082	4.63	3.24	6.22122	A	321	AACACTCTcccccTTACGAGTACTCATCCTCACTACACTAAGAGGACCTAGACTTCAAAGAAAGGTGGaaaaaCAATCTACCTTGAACTTTCCTAAGGACTTGGATGCAATCGAGGAAGACAACTTtctctctctcAGGAAGTCAAGGAAATAGGAAGATGAAAGAAAGCCAAAATGTTAGACTTCCAGTTCAAATAGCCTTATTAAACAATATTTTATTTCCTAAGAAAACCACTTAGACTGCACATTACTCTAGTTAGCCACTGAAATCTTCTGATGATTTGATCTTATCAAATCATTATAGGGACGCTCTTCCGATCT
	M00842:287:000000000-BGGT4:1:1108:6541:6911	1	77	20	10	1	AG	GAGAGAGAGAGAGAGAGAGA	NA	1	1	1	2	113	GAAGAGCTCGACAAGGACCCTCTAACAGTCAAGCCAGTAACAACGGCAATAAAGAAAATAgggggggggggagagagagagagagagagaGTGGAGAGTAATGAGTCCAGccc	GAAGAGCTCGACAAGGACCC	GGGCTGGACTCATTACTCTCC	50	2	7	20	119	21	60.109	59.585	4.46	3.71	1.52312	F	256	AGATCGGAAGAGCTCGACAAGGACCCTCTAACAGTCAAGCCAGTAACAACGGCAATAAAGAAAATAgggggggggggagagagagagagagagagaGTGGAGAGTAATGAGTCCAGcccccATTCCTATTGGCATTGGGTCCTCTTTTATGGAGAGTTTATGGAGCCAACTGTGGGCCATGTGAAGTCAATAAAAGTGGCGAATAAATTaaaaaGTGATGGCTATCATTGTCACTATTCTGATTTAATTATGACTA
	M00842:287:000000000-BGGT4:1:1108:6738:22374	1	186	10	5	1	AT	TATATATATA	NA	1	1	3	38	233	TGGCCATTGGACTGAACAAATCGGCAAAACTATTTGAACACAATAACTAATCTAACTGATTAGGTCACCTGAGACAATAAAACTGAGCCATTATACAAGATCTGACACATAAATTGATCATTCTGAATTATTTATGCTTTGCAACGCATTTTACTTATACTTTCtatatatataTTAATGCATTTTAGTTATGCTATGTTTCCTACTAAGATTCTCGTGAGCTCATAACTCCC	TGGCCATTGGACTGAACAAA	GGGAGTTATGAGCTCACGAGA	144	38	22	20	254	21	57.921	58.975	2.83	4.04	4.10433	A	332	GTCCAATAAGACAAATAAGATTGGCCATTGGACTGAACAAATCGGCAAAACTATTTGAACACAATAACTAATCTAACTGATTAGGTCACCTGAGACAATAAAACTGAGCCATTATACAAGATCTGACACATAAATTGATCATTCTGAATTATTTATGCTTTGCAACGCATTTTACTTATACTTTCtatatatataTTAATGCATTTTAGTTATGCTATGTTTCCTACTAAGATTCTCGTGAGCTCATAACTCCCCATGATGAAACATTATTTAGCTAAACTAAAGAGCAAACTGGAATCCTCCAGAAGGTTCTctactactaACTTACAGTT
	M00842:287:000000000-BGGT4:1:1108:7070:11318	1	137	64	17	1.5	AC	CTCTCTCTCTCTCTCACACACACACACACACACACACACACACACACACTCTCTCTCTCTCTCT	NA	1	1	3	2	139	AATCTAGTGCTGTCGGTCtttttttATATACAAGaaaaaCCTAACGCATTGATAActctctctctctctcacacacacacacacacacacacacacacacacactctctctctctctctCCCTCTCCGCGGTCCAAATG	AATCTAGTGCTGTCGGTCTTT	CATTTGGACCGCGGAGAG	34	2	82	21	220	18	57.037	58.2	2.52	3.2	7.76318	F	281	CATTTCTTTCCTCCCAtttttCCTTCTTAATGCATTAATTATTAACTGAATAAATACGAAGAATCTACAGGTCTGCTATCGAATCTAGTGCTGTCGGTCtttttttATATACAAGaaaaaCCTAACGCATTGATAActctctctctctctcacacacacacacacacacacacacacacacacactctctctctctctctCCCTCTCCGCGGTCCAAATGATAATACACTATCTTTTCCCTTCTGTTTTAAttttttCACCTTTTCTCTACAAACATCTTT
	M00842:287:000000000-BGGT4:1:1108:7533:26010	1	220	12	6	1	AG	CTCTCTCTCTCT	NA	1	1	2	5	207	GTCGGATATGACGCTGGTGTCCAAGGTGCCCTGGGGCCTCTTGCGGACCCTCCTCGCCAACCTGCAGGAGGTCTTAATGGGGACGAAGCTCTTCGtcctcctccCCGCCGTcccccTCGCCATCATCGCCCAGTTGTTTCACTTCGGTCAAGTACGCCCTTACCCTCTCActctctctctctTCTCCACATACACTGAGCCGCCATG	GTCGGATATGACGCTGGTGT	CATGGCGGCTCAGTGTATGT	150	5	50	20	256	20	59.898	60.463	4.16	2.29	0.565062	F	312	GGCACGGGCGCACTGCGCACAACATGTCAtcgtcgtcgATGCGGAAGAAGTCGGATATGACGCTGGTGTCCAAGGTGCCCTGGGGCCTCTTGCGGACCCTCCTCGCCAACCTGCAGGAGGTCTTAATGGGGACGAAGCTCTTCGtcctcctccCCGCCGTcccccTCGCCATCATCGCCCAGTTGTTTCACTTCGGTCAAGTACGCCCTTACCCTCTCActctctctctctTCTCCACATACACTGAGCCGCCATGGGCCGTAGATCCTCTGGCCTTCTaaaaaaGTTATTTTGCTGATCCAATTATGTAAC
	M00842:287:000000000-BGGT4:1:1108:7855:8575	1	136	25	5	1.5	AG	AGAGAGGGAGAGAGGGAGAGAGAGA	NA	1	1	4	9	185	GCTCATCGGACCTATCCACTAGGCATCATGCCCTCTTTCTTCACTTTGTGTTCTAACAGGCTTGTAGTCAAGCCTGCGGCTAAGCCTAGGACCAGCACACCGCTAACGCACAGTAAGAGTAAGGAggggggagagagGgagagaGGgagagagagaGGTAGACAGACGCCTCTTCTTTCCTTGGT	GCTCATCGGACCTATCCACT	ACCAAGGAAAGAAGAGGCGT	111	9	5	20	189	20	58.667	59.234	4	5.68	2.09869	F	220	ACTAGCTCATCGGACCTATCCACTAGGCATCATGCCCTCTTTCTTCACTTTGTGTTCTAACAGGCTTGTAGTCAAGCCTGCGGCTAAGCCTAGGACCAGCACACCGCTAACGCACAGTAAGAGTAAGGAggggggagagagGgagagaGGgagagagagaGGTAGACAGACGCCTCTTCTTTCCTTGGTCTCACTATTGCCTGTCTTCCCTCACCACAGT
	M00842:287:000000000-BGGT4:1:1108:8543:10711	1	232	10	5	1	AG	TCTCTCTCTC	NA	1	1	3	62	241	CACCTACACGCCCACTTGTATTGGCACaaaaaaTCTTGATTATGATATTTAATTATGGTTGTTTGtttttCACTGGTCAAAGtctctctctcTACAAATTTAGTGTAATATTTGAAACTTTGAATGaaaaaTGTCTTGCGACCTTCCATTTCATACTCTTGGTAGTGCAAAAGGCCGCCTTTTCATTCCATCATCCAAGTGCTGCAATATCAGCAAAATCCGTTCAATCCAAGGAGAAAGG	CACCTACACGCCCACTTGTA	CCTTTCTCCTTGGATTGAACGG	62	127	150	20	390	22	59.681	59.25	2.41	4.44	3.0687	F	412	aaaaaTGATTTTCATATTCTTCATCCCCTCTCCTaaaaaaaaCTTTTCATGTTCTTCATCAATTCATTccccccccaaaaaTTATATTAAATAATACTGAACTGGTACGGTCGATTCAATACATACCTAGTCAAACCATATTGGTGAGCCACCTACACGCCCACTTGTATTGGCACaaaaaaTCTTGATTATGATATTTAATTATGGTTGTTTGtttttCACTGGTCAAAGtctctctctcTACAAATTTAGTGTAATATTTGAAACTTTGAATGaaaaaTGTCTTGCGACCTTCCATTTCATACTCTTGGTAGTGCAAAAGGCCGCCTTTTCATTCCATCATCCAAGTGCTGCAATATCAGCAAAATCCGTTCAATCCAAGGAGAAAGGAATGCAAGA…
	M00842:287:000000000-BGGT4:1:1108:8664:20799	1	101	22	11	1	AT	TATATATATATATATATATATA	NA	1	1	5	33	237	TGTTTACCTCATGTATAGATGGTCAAatatatTTCATCATATTTATTAATGACCATTCtatatatatatatatatatataTTTATCTCttttttAATAAGTCTGAGGCACTTGATGCTTTTAAGACTTTaaaaaTTGAGGTAGAAAGTTAGTTAGAAAGAAAGATCAAAATAGTAAGATTTGATAGGGATGGAGAATATTATGGGCGGTATACTGAAGTTGGTTAATGGCCAGGTCC	TGTTTACCTCATGTATAGATGGTCA	GGACCTGGCCATTAACCAAC	33	137	43	25	279	20	57.331	58.817	4.02	3.77	8.85176	F	366	GTACTCAACTTTTAAAGATCATACATACTGATATTTATGAATTGTTTACCTCATGTATAGATGGTCAAatatatTTCATCATATTTATTAATGACCATTCtatatatatatatatatatataTTTATCTCttttttAATAAGTCTGAGGCACTTGATGCTTTTAAGACTTTaaaaaTTGAGGTAGAAAGTTAGTTAGAAAGAAAGATCAAAATAGTAAGATTTGATAGGGATGGAGAATATTATGGGCGGTATACTGAAGTTGGTTAATGGCCAGGTCCTTTTGCTGATTTTCTTAAGGAAGAAGGTGTTGTCACTCAATACGCAATATTAGGCTTACCTCAATAAAACAGGGTTGTTgagagaTG
	M00842:287:000000000-BGGT4:1:1108:8837:26748	1	141	15	5	1	AAT	AATAATAATAATAAT	NA	1	1	5	7	160	TGGGAGTTCTTAGCAACTAGCTATTGAGAATTTAAACTACTAGCCATTaaaaaTTTCTATtatatataCGAGCTAGTGTAAATACTTGTAACAGTACATTCTTTTGAAGaaaaaaaataataataataatATATTCTTCTCTTCATCCCTACTTGTTCCA	TGGGAGTTCTTAGCAACTAGC	TGGAACAAGTAGGGATGAAGAGA	94	7	26	21	185	23	57.388	58.574	3.42	3.1	8.03754	F	197	TTAAGAGTTTTAAGTAATTAATTGTTGGGAGTTCTTAGCAACTAGCTATTGAGAATTTAAACTACTAGCCATTaaaaaTTTCTATtatatataCGAGCTAGTGTAAATACTTGTAACAGTACATTCTTTTGAAGaaaaaaaataataataataatATATTCTTCTCTTCATCCCTACTTGTTCCAACAGTCGAGACA
	M00842:287:000000000-BGGT4:1:1108:9194:11798	1	103	42	18	1.5	AG	GAGAGAGAGAGAGAGAGAGAGAGAGAGAGAGAGAGAAGAGAG	NA	1	1	4	0	138	GGAGAGGGATTGCATGGTGATTTGGATGCTTCTTCAATAGGGAATCATGGCTTTCTTCATGGGACAGGTGCATGTgagagagagagagagagagagagagagagagagagaagagagGGGAGAGGAGATATGACTGCT	GGAGAGGGATTGCATGGTGA	AGCAGTCATATCTCCTCTCCC	55	0	28	20	165	21	59.452	58.112	4.02	4.3	3.43624	B	244	TGCTTGCTTCCTTTCAATAGTGCCATGGGAGAGGGATTGCATGGTGATTTGGATGCTTCTTCAATAGGGAATCATGGCTTTCTTCATGGGACAGGTGCATGTgagagagagagagagagagagagagagagagagagaagagagGGGAGAGGAGATATGACTGCTAGGGTTTTGGGAGAAAAGGTTTTGTTTATTCCATCCAATCAATTGGTGTTATATGACTGTATTTATACTAATTACAATT
	M00842:287:000000000-BGGT4:1:1108:9223:8019	1	84	10	5	1	AG	GAGAGAGAGA	NA	1	1	3	55	181	ACACCAGCATTCGTTAGCGAATCAATAGCCgagagaAAGCTAGAACTGCTAgaggaggagAGACAGGGAGTGAATgagagagagaAGTCGaaaaaCAATTCCTCTTCctctctCCCCGCACTATAGCTGTGTATGTcccccGAGGCTCTTTCTTGCGGGCATCCCAGAAGCTTCTAACCGC	ACACCAGCATTCGTTAGCGA	GCGGTTAGAAGCTTCTGGGA	55	76	9	20	189	20	60.038	59.751	4.93	4.37	0.287095	F	276	CAGCATCTACACCAGCATTCGTTAGCGAATCAATAGCCgagagaAAGCTAGAACTGCTAgaggaggagAGACAGGGAGTGAATgagagagagaAGTCGaaaaaCAATTCCTCTTCctctctCCCCGCACTATAGCTGTGTATGTcccccGAGGCTCTTTCTTGCGGGCATCCCAGAAGCTTCTAACCGCTCTGTGAACTCCCTGCACGCAGGCTCGCTCGGGCCATGCCCACGTCAGATCAGGCCAcccccGATTGGCCCAATGCTCCCACACTGG
	M00842:287:000000000-BGGT4:1:1108:9652:14205	1	91	24	8	1.5	AT	CTCTCTTTTATATATATATATATA	NA	1	1	4	6	115	CCCTTTCATCCGTCGAGTCACTTTCATTCTAGAGTCTTTGGTCTCCCCTTTCTTTGTACATTCctctctTTtatatatatatatataGTATAATGGACATTGACAGGTGAAAGGT	CCCTTTCATCCGTCGAGTCA	ACCTTTCACCTGTCAATGTCCA	43	6	28	20	142	22	59.469	59.825	3.41	4.02	2.70538	B	350	TATACTTTTGATAAAGGGAAATACGTCCCCTTTCATCCGTCGAGTCACTTTCATTCTAGAGTCTTTGGTCTCCCCTTTCTTTGTACATTCctctctTTtatatatatatatataGTATAATGGACATTGACAGGTGAAAGGTgagagaAagagagagagTGATAAAGAACgagagaTATCAAGAGCCAAAGCCaaaaaTCACATGGCCCCTCCCATAAGACTGTTGGTGAATAGcccccAACAGTATCATGGCCCCTTCTCCTacacacATGCAAGTTATCAAGCATGTCCGTTCGCATGTCCACCAACTAGTTCTCCCCAACTAGTTCTCATGCCCAGCTGGTAGCGAC
	M00842:287:000000000-BGGT4:1:1108:9913:10381	1	75	18	6	1	AAG	CTTCTTCTTCTTCTTCTT	NA	1	1	17	5	107	TCTCCTTCTTCTCCTTCTGCTTCATCTTCTCCATTTGCTGCTTGATTAGCTTCTCTTACTCcttcttcttcttcttcttTTTCTACTTCATCCACTTCACTTCTCct	TCTCCTTCTTCTCCTTCTGCT	AGGAGAAGTGAAGTGGATGAAGT	40	5	14	21	120	23	57.817	59.093	4.24	3.01	7.08973	F	364	ATTTGCttttttATCTCCTTCTTCTCCTTCTGCTTCATCTTCTCCATTTGCTGCTTGATTAGCTTCTCTTACTCcttcttcttcttcttcttTTTCTACTTCATCCACTTCACTTCTCcttcttcttCATCTTCTCTATCTTCCTAACCTACTTCtttttCTCCTTCTGCTTCATCATCTCcttcttcttcttcttcttCCtcttcttcttctGCTACTGCTGCTTCATCTTCTATGTTGGTTGCATCATTAGCTTTGTTGCTTCAACAAATTCAACTTCTCCTTCTGCTTTTGTTGCATCATCTGCTTCAATAGATTCAACTTCATTAACTTCTATTGCTTCATTAACTTCATCATCTTCTTC
	M00842:287:000000000-BGGT4:1:1109:10303:11562	1	311	10	5	1	AC	CACACACACA	NA	1	1	5	0	273	ACCAAATCTCTAGTGTGCTGGATATCCTTCATAGGTTGTAActctctAGGATCATTAGGTACAACATCAAGGAACTCAACTAACAATTTACCTTTCTCCTGAGGGAGCTTAGACTTATGCTTAGTGGACTGAGGAGTCTTTCTAGCTATAATTGCTAACCAACTGTTATTCGTTAAACTCttttttttGAAGGTTCTATGGTTGAAGATATTGATACCCTTTCTAACAGGTTTAGTCTTGcacacacacaCTCCTTATGTGAGGGTTTAGCAA	ACCAAATCTCTAGTGTGCTGGA	TTGCTAAACCCTCACATAAGGAG	218	0	71	22	343	23	59.094	58.156	3.86	3.69	7.75012	F	373	GCTATTCAACTCAACATGTTCCCTAAGGCTTAATCTATAATTGGGAAGGTAAGATAATTGAGAGCCTTTGACCAAATCTCTAGTGTGCTGGATATCCTTCATAGGTTGTAActctctAGGATCATTAGGTACAACATCAAGGAACTCAACTAACAATTTACCTTTCTCCTGAGGGAGCTTAGACTTATGCTTAGTGGACTGAGGAGTCTTTCTAGCTATAATTGCTAACCAACTGTTATTCGTTAAACTCttttttttGAAGGTTCTATGGTTGAAGATATTGATACCCTTTCTAACAGGTTTAGTCTTGcacacacacaCTCCTTATGTGAGGGTTTAGCAAAAGTCAAAATGAGGGTTTAGCATGATTGGT
	M00842:287:000000000-BGGT4:1:1109:10855:9870	1	50	18	6	1	AAG	AAGAAGAAGAAGAAGAAG	NA	1	1	6	2	190	ACAGAAGAACAAGGAAGTGCCAAAaagaagaagaagaagaagGATCACGAAGAATTAGATGGTGATGTCCAAATGGAGGCTGAAAAGAAGaaaaaGAAGaaaaaGGCaaaaaCTGAAGATGATGAGTAATTATGATATGCAACTAGCGTTGGTTTGGTTTTATTCATTAGCTTGTGATCCCTACTGAAGC	ACAGAAGAACAAGGAAGTGCCA	GCTTCAGTAGGGATCACAAGCT	2	126	26	22	215	22	60.092	60.093	4.92	3.74	4.18566	F	286	AGTGAATGGGATGAATGGTCATGATACAGAAGAACAAGGAAGTGCCAAAaagaagaagaagaagaagGATCACGAAGAATTAGATGGTGATGTCCAAATGGAGGCTGAAAAGAAGaaaaaGAAGaaaaaGGCaaaaaCTGAAGATGATGAGTAATTATGATATGCAACTAGCGTTGGTTTGGTTTTATTCATTAGCTTGTGATCCCTACTGAAGCTCATGtttttGTCAAGTCATAGtttttGCCCCTATAGATTACTTTGAGCTCTTGAACTTGATAGGACTGCA
	M00842:287:000000000-BGGT4:1:1109:11059:18490	1	132	16	8	1	AG	TCTCTCTCTCTCTCTC	NA	1	1	4	69	200	GAAGAAGGGTACAGCGCCTTGTCAATGGTGAGCTCTTAGCGCCTTCAATCCCTaaaaaaTCTTTCttttttCTTTTCTTtctctcTTCTtctctctctctctctcttttttttATAGCCTCAGATTCCCTACTTATGACTGATCCCAAGTTGTTTTGTTCTGTGTCTCCGGCTTTTGCCCCAGATTGCGGTGCACTATGC	GAAGAAGGGTACAGCGCCTT	GCATAGTGCACCGCAATCTG	69	75	43	20	242	20	60.036	59.971	4.35	2.9	0.064799	F	472	GACCTGAACTCAGTGGACTCCTCTGAGCATTGGGTGATAGTAGAAGAAGGGTACAGCGCCTTGTCAATGGTGAGCTCTTAGCGCCTTCAATCCCTaaaaaaTCTTTCttttttCTTTTCTTtctctcTTCTtctctctctctctctcttttttttATAGCCTCAGATTCCCTACTTATGACTGATCCCAAGTTGTTTTGTTCTGTGTCTCCGGCTTTTGCCCCAGATTGCGGTGCACTATGCGTACCTGCATGCTTGCCTCCAAGGGAAGCGAGCGCTCTCAGCGGGAGACGAAGCCCTGGTTTCCAAATACTGAGGCCGTGTATCGCAATTAAGTCGAGACCTGGGACATGCGACGGGGATCATCAAGGAGAAGGACCAGGAGATCCGAGACCTTCGC…
	M00842:287:000000000-BGGT4:1:1109:11080:11805	1	107	14	7	1	AG	AGAGAGAGAGAGAG	NA	1	1	3	80	260	GGATGGTTCCAGCGATTACAATGAAATGCTGACAACGAAgggggAGAAGGAAagagagGAAAagagagagTGGGGCAAGGAGGGAAAGGGAGAGGAAGGAagagagagagagagATGGTTGTCGACTTGCAGTGAGTCGTGGAGGGTTGGCGATTGTATAGAAGAGGTGGAGAAGGGAGAACGAAAGATAGGAAAagagagagAATGGGAAGGGAGGgagagaAGGCCgggggAGGCTGGCCAAGGGTCgtgtgtCCTTT	GGATGGTTCCAGCGATTACA	AAAGGACACACGACCCTTGG	80	126	7	20	266	20	57.674	60.179	2.41	3.61	2.50461	F	296	GAACATGGATGGTTCCAGCGATTACAATGAAATGCTGACAACGAAgggggAGAAGGAAagagagGAAAagagagagTGGGGCAAGGAGGGAAAGGGAGAGGAAGGAagagagagagagagATGGTTGTCGACTTGCAGTGAGTCGTGGAGGGTTGGCGATTGTATAGAAGAGGTGGAGAAGGGAGAACGAAAGATAGGAAAagagagagAATGGGAAGGGAGGgagagaAGGCCgggggAGGCTGGCCAAGGGTCgtgtgtCCTTTTGGCCTCTGCGATTTCGCAGAAAAGGGGCC
	M00842:287:000000000-BGGT4:1:1109:11269:9026	1	144	14	7	1	AG	TCTCTCTCTCTCTC	NA	1	1	4	33	143	AGGGATGGGACCACTCTTccccccAAAGCTCCTTCCTCTATCCTTagagagagTCTATAGATATCCTCTAAACTCTtctctctctctctcTACTTTTATTACTGTTGCCTATCGTGCTGACTTGAGCATCAGAGTCAGCACGA	AGGGATGGGACCACTCTTCC	TCGTGCTGACTCTGATGCTC	56	33	68	20	210	20	60.622	59.828	3.46	4.26	0.79399	F	215	TAACCATATGGCCTCTATGCAAGGCCTTTCTCATCTCTTATAAAAGAGGACCCTATACCACCAATAAAGGGATGGGACCACTCTTccccccAAAGCTCCTTCCTCTATCCTTagagagagTCTATAGATATCCTCTAAACTCTtctctctctctctcTACTTTTATTACTGTTGCCTATCGTGCTGACTTGAGCATCAGAGTCAGCACGATAGGC
	M00842:287:000000000-BGGT4:1:1109:11300:6965	1	177	27	8	1.5	AG	CTCTCTCTCTTTCTCTCTCTCTCTCTC	NA	1	1	4	50	207	CCGGGTTTCCTTCCCAGTTTCTCCCTCTTCTccccccTCtcttcttcttctCTTCTTcccccAGATtctctctcCCTAATCTCCCAGTtctctctcctctctctATTTCCctctctctctTtctctctctctctctcGGGTCAATAGTTTAcccccAAACCACATCCGTAGGCCACaaaaaCCCATGGATTCACCCATCCCAGGTCG	CCGGGTTTCCTTCCCAGTTT	CGACCTGGGATGGGTGAATC	90	50	67	20	273	20	60.179	60.179	2.66	2.52	0.358018	F	289	ATTAATTAGAGAAGATTATTGAGtttttGGCTATGGTGCCTTcccccTCTCTGTTTCTTCCCTTCCCCGGGTTTCCTTCCCAGTTTCTCCCTCTTCTccccccTCtcttcttcttctCTTCTTcccccAGATtctctctcCCTAATCTCCCAGTtctctctcctctctctATTTCCctctctctctTtctctctctctctctcGGGTCAATAGTTTAcccccAAACCACATCCGTAGGCCACaaaaaCCCATGGATTCACCCATCCCAGGTCGTTTGCTCCGCCCGATC
	M00842:287:000000000-BGGT4:1:1109:11397:5782	1	247	10	5	1	AC	CACACACACA	NA	1	1	4	99	297	CAACTATGGTGCTCATGTCTGTAATCATATTTCTAGTGCATTCGCATATGCATGAGTTTGTAAGACAATATCTTATGTGCTTGCATacacacAAGTTTGTAGGATAAAATATCTAgtgtgtTCACATGcacacaGGTCTGTAGGATAAAATATTTATTGTGTTcacacacacaTGGGTCCTAAGACAAAATCTTTGGTGCACTCACATACGTGCATGTTCACAAGACCaaaaaTAAATATCTAGTGTGCTTGCTTACGCACATATCCACAAAACCTAGGTCGAATGAAATTCAAACC	CAACTATGGTGCTCATGTCTGT	GGTTTGAATTTCATTCGACCTAGGT	141	99	84	22	380	25	58.396	59.585	3.41	3.08	9.0183	F	473	AATTAAAATACCATATTTAACTCAAACATCATTTATTTCAtctctcTTTGTTGGGAATGGACTATCCATATCTCTTTCTAGTTCAACTATGGTGCTCATGTCTGTAATCATATTTCTAGTGCATTCGCATATGCATGAGTTTGTAAGACAATATCTTATGTGCTTGCATacacacAAGTTTGTAGGATAAAATATCTAgtgtgtTCACATGcacacaGGTCTGTAGGATAAAATATTTATTGTGTTcacacacacaTGGGTCCTAAGACAAAATCTTTGGTGCACTCACATACGTGCATGTTCACAAGACCaaaaaTAAATATCTAGTGTGCTTGCTTACGCACATATCCACAAAACCTAGGTCGAATGAAATTCAAACCtttttCAATGTCCAACCAT…
	M00842:287:000000000-BGGT4:1:1109:11524:2443	1	206	12	6	1	AG	CTCTCTCTCTCT	NA	1	1	4	45	192	ACCTTTCCACCATCTCACCTCTACGACTGTTTGCCATCCTCCCACCACAACTCCCCATCATCTTCctctctctctctTCCACCTCATTCTCTACACAACCCACATGCCATCTGACATGCAGTCCGGTGAGAGCAGTACAATAAAATGGTGCTAGAAGGATGGCTCCTTCTCTTAAGAGATCATTGAGCCTCT	ACCTTTCCACCATCTCACCT	AGAGGCTCAATGATCTCTTAAGAG	45	91	141	20	332	24	58.253	57.59	4	2.85	8.15697	A	365	ACTTTACTAACTTGACCATCGGAGAGTCCTCACTAGAACCCCATCCGATGAAGGACTTGTTTGTAGGATTATGGATTGGTCAGAGGAGGTGACGGGACTACTGctactactaCTCTGCCTCACCTCTATTCtttttCTATACCTTTCCACCATCTCACCTCTACGACTGTTTGCCATCCTCCCACCACAACTCCCCATCATCTTCctctctctctctTCCACCTCATTCTCTACACAACCCACATGCCATCTGACATGCAGTCCGGTGAGAGCAGTACAATAAAATGGTGCTAGAAGGATGGCTCCTTCTCTTAAGAGATCATTGAGCCTCTTTTCCAATAtttttACTaaaaaGGAGGAATGAG
	M00842:287:000000000-BGGT4:1:1109:13016:13390	1	68	10	5	1	AG	AGAGAGAGAG	NA	1	1	3	3	137	TGGATACAGATTGTAGGACCCAGAAagagagagagTGTTTAGAAGCTGGGATGTAGTATTTTGTGAGGATCAGACCCTTAAAGATATTAGTaaaaaGAAGCCAGCCAAGTTTTCAGATAAAGGGTTAGTTGATTGTG	TGGATACAGATTGTAGGACCCA	CACAATCAACTAACCCTTTATCTGA	3	77	43	22	179	25	57.998	57.078	4.51	3.27	11.924	F	213	AATAAAAGAATGTAtttttCTGGGATATCAATATGATGAGTTTGGATACAGATTGTAGGACCCAGAAagagagagagTGTTTAGAAGCTGGGATGTAGTATTTTGTGAGGATCAGACCCTTAAAGATATTAGTaaaaaGAAGCCAGCCAAGTTTTCAGATAAAGGGTTAGTTGATTGTGATCCAGTTACTCCTCCAGTATATCAAGGTGATGG
	M00842:287:000000000-BGGT4:1:1109:13107:9051	1	187	10	5	1	AT	TATATATATA	NA	1	1	2	4	95	ACTCGCTGCAGAAACCATCAGAGgaagaagaaGGCAATTCTAAGACCCTTTACCCTCTACTtatatatataGTCAGCTCCGATGGTCGAGATCAG	ACTCGCTGCAGAAACCATCA	CTGATCTCGACCATCGGAGC	41	4	126	20	220	20	59.965	60.04	3.07	4.7	0.074934	B	277	ATCTAAATCTCTAAGCTTCAAGGATGAAGAAGGATGATAATCTTGaaaaaGGAAGGAAAAGCTCAAAACACCAACCTAGAGCAGACAATAGGACCTTGGCAAGAGCTACAATCTTTGCAAATGGCACTCGCTGCAGAAACCATCAGAGgaagaagaaGGCAATTCTAAGACCCTTTACCCTCTACTtatatatataGTCAGCTCCGATGGTCGAGATCAGTGTTAGTTCAAATGTACAAACTACAGATTTTCCCATGTGTTGTGAATCAAGAATTAA
	M00842:287:000000000-BGGT4:1:1109:13530:8367	1	111	149	12	2	AAG	CTTCTTCTTCTTCTTCTTCTCCTTCTTTTTTCTATAAATAAAAATTTTATTTCTATATCTTTCTAATATTTTTTAATAAAAAATTTATTTTATCTTCTTCTTCTTCTTCTTCTTCTTCTTCTTCTTCTTATTATTATTATTATTATTAT	NA	1	1	4	30	292	CTGGTGAGGGCACTTGACACTAAGACCGCATGTGGTCCCTCTGTTAACTActtcttcttcttcttcttCTCCTTCttttttCTATAAATaaaaaTTTTATTTCTATATCTTTCTAATAttttttAATaaaaaaTTTATTTTAtcttcttcttcttcttcttcttcttcttcttcttcttattattattattattattatTTTTACAGCTAAGGTTGGCAACTAGAAAGAGAAAGGAGGTGGGGCCAGCAACATGAGTAAGGATGACaaaaaGCTCGACGTAGGGTAAAGAGT	CTGGTGAGGGCACTTGACAC	ACTCTTTACCCTACGTCGAGC	30	72	61	20	352	21	60.886	59.258	3.67	5.03	2.62876	G	465	GAGCGCTCCATTCATTAGTGCTCGCCGCAtttttAATGCTTTAAAGCAACCAAGAGGCTGCTGGTGAGGGCACTTGACACTAAGACCGCATGTGGTCCCTCTGTTAACTActtcttcttcttcttcttCTCCTTCttttttCTATAAATaaaaaTTTTATTTCTATATCTTTCTAATAttttttAATaaaaaaTTTATTTTAtcttcttcttcttcttcttcttcttcttcttcttcttattattattattattattatTTTTACAGCTAAGGTTGGCAACTAGAAAGAGAAAGGAGGTGGGGCCAGCAACATGAGTAAGGATGACaaaaaGCTCGACGTAGGGTAAAGAGTGAGGAAGTAGTAAAAGAAAGATAAATAAGGATGGAGTAGACGGCATG…
	M00842:287:000000000-BGGT4:1:1109:13822:2096	1	301	10	5	1	AT	ATATATATAT	NA	1	1	2	72	282	TCTGAGGAGCTGCACATTGGAAAGAATATGATATTAGGCAATTCTTCAAGTGTTCAAACTTCCACTACTTTATCAGTCAACCtttttAAAAGTTTGCCGTCCAGTACCAACTTATCACCAACTTATTACAATGCCATATCAAGTGCATCAGTTTGATATCAGTATGGCATGTCTGatatatatatGGTATGTACTAAACCAATATGGCAAAACTTAAATCCAAATATAGCTTtatataATAATAACCAGCGAGGaaaaaGGTACCTAGACATGAAATCTTGA	TCTGAGGAGCTGCACATTGG	TCAAGATTTCATGTCTAGGTACCTT	155	72	126	20	407	25	60.036	57.504	3.16	3.5	7.53207	F	478	TTTCTAACATTTTCATCACAGTCCAACAATGGGTCCCTTAATACCTCTaaaaaCAAGGTCAACTATCACAAAATGTATTAGTAGCAAATCAAAATACAAATTGGAATATGTCACCTTACTGATGATCTGAGGAGCTGCACATTGGAAAGAATATGATATTAGGCAATTCTTCAAGTGTTCAAACTTCCACTACTTTATCAGTCAACCtttttAAAAGTTTGCCGTCCAGTACCAACTTATCACCAACTTATTACAATGCCATATCAAGTGCATCAGTTTGATATCAGTATGGCATGTCTGatatatatatGGTATGTACTAAACCAATATGGCAAAACTTAAATCCAAATATAGCTTtatataATAATAACCAGCGAGGaaaaaGGTACCTAGACATGA…
	M00842:287:000000000-BGGT4:1:1109:13919:11236	1	225	31	9	1.5	AG	TCTCTCTCTCTCTCTCTCGCTCTCTCTCTCT	NA	1	1	6	44	170	ATGGGCCAGGATCAGGGTAAATGATGAAGGAAACCCCATGAAACTGAGAGGAAGGGAAGGGTGAAGAGACATCATtctctctctctctctctcGctctctctctctTGGTTGTGACTATGAGCTAGTCACAGGTTTGGGACTATGGTAAGGGGAGGAAGGGACAAAGTGA	ATGGGCCAGGATCAGGGTAA	TCACTTTGTCCCTTCCTCCC	55	44	150	20	319	20	60.328	58.935	2.85	4.3	1.39328	B	373	ATCCCTGATGCTTTGATTTTGAGCCAAATAAAGGACATCCAGTGATGGGAGATgggggAAGCCCTGATCGCTGGTGGATCTGAGGGATCCAGCATGATCGGCCATCCCTTATAGCTGTCGGAGCTACCAACAGTGCCAATGAGAGTTGGATGGGCCAGGATCAGGGTAAATGATGAAGGAAACCCCATGAAACTGAGAGGAAGGGAAGGGTGAAGAGACATCATtctctctctctctctctcGctctctctctctTGGTTGTGACTATGAGCTAGTCACAGGTTTGGGACTATGGTAAGGGGAGGAAGGGACAAAGTGAGATAGAGGGAGGAAAGGCCTTTAtctctctctctctctctcCTAgtgtgtgtAG
	M00842:287:000000000-BGGT4:1:1109:14825:23587	1	126	23	6	1.5	AC	CACACACACACATACACACACAC	NA	1	1	5	20	128	tgtgtgATCAATATCATGATGGTCTTTCACCACATATAAatatatatACTAATCTACTATcacacacacacaTacacacacacATATGCATAGAGATCAAAATAGGGTAGATTGTTCATTTATTGCAC	TGTGTGATCAATATCATGATGGTCT	GTGCAATAAATGAACAATCTACCCT	35	20	66	25	193	25	58.166	57.9	3.85	4.34	13.9346	F	193	GTAAGTTACCAACATCTCTATCAAATATCATGTATAGCAATAATGCAGTGGAGAACCAAAATGCAtgtgtgATCAATATCATGATGGTCTTTCACCACATATAAatatatatACTAATCTACTATcacacacacacaTacacacacacATATGCATAGAGATCAAAATAGGGTAGATTGTTCATTTATTGCAC
	M00842:287:000000000-BGGT4:1:1109:15298:15170	1	44	14	7	1	AG	CTCTCTCTCTCTCT	NA	1	1	4	2	140	CCAGTGGAAGCAACGGTCATCCctctctctctctctGCTTGAAAGCCAGGAAGGCAAGAACCTTATGAGATGCCCATCCCACACGTAAAGGACAAAATGGCCATATAAGTTAGGCCTGGGAAGCCAAGGTCCATTCATCT	CCAGTGGAAGCAACGGTCAT	AGATGAATGGACCTTGGCTTCC	2	82	22	20	161	22	60.606	60.358	3.06	3.46	2.96397	A	432	TCCTAAGCGAAGCTTTTCACCCCAGTGGAAGCAACGGTCATCCctctctctctctctGCTTGAAAGCCAGGAAGGCAAGAACCTTATGAGATGCCCATCCCACACGTAAAGGACAAAATGGCCATATAAGTTAGGCCTGGGAAGCCAAGGTCCATTCATCTATCTCCCCATGATCCAACGACTTTTCTGTTCTTATTTATTTTACAGGCGTTAGATTTCCAGCAAACGTAAtgtgtgCGAAATGGCGCATTTATTAATGTCAGAATGATGCCCAAATTAGTAATTTTCTTTCTCCTGGTTCTTGAAGCACTGCGCTTCTTTTCCGGCTACCGGTGATCTCATAGCTTTTCTTGAGCTGAAATCCTGGTGTTTGGGACATGGGAGCCAAGAATTGGAAGC…
	M00842:287:000000000-BGGT4:1:1109:16089:28686	1	256	10	5	1	AC	TGTGTGTGTG	NA	1	1	2	1	161	GCAACCCTAAGTTAGAACGTGTTTTCCttttttttGGTGTAATAATGTAAAACTTGGTTTTAAGCATCATGAATTACTTGGTTCCTGGTTTTCTCAAAATAATGAATGCCTACACAGTTTTGTTATGCtgtgtgtgtgCCTGTCTCTAAGCATTTGGGTGC	GCAACCCTAAGTTAGAACGTGT	GCACCCAAATGCTTAGAGACAG	106	1	128	22	288	22	58.603	59.579	4.49	3.51	5.81798	F	293	AGTTTCTTTGATCTCATAATTGTCTTTTGGAATTGTCATTTTCATTGTTCAGTTATCAAAACAACTCAAAATTGTATTATCTGATCTCTTGATGTTTCTAGTTTCCtttttGTTCCTATATCTGAGAGCAACCCTAAGTTAGAACGTGTTTTCCttttttttGGTGTAATAATGTAAAACTTGGTTTTAAGCATCATGAATTACTTGGTTCCTGGTTTTCTCAAAATAATGAATGCCTACACAGTTTTGTTATGCtgtgtgtgtgCCTGTCTCTAAGCATTTGGGTGCTTGTG
	M00842:287:000000000-BGGT4:1:1109:16324:7943	1	138	10	5	1	AG	GAGAGAGAGA	NA	1	1	12	22	139	GgagagaAGGGCATTTATGAGgagagaAAGaaaaaaGCTCTTCAATATTTATTGGAagagagagGgagagaTTCGACTAAATAAGgagagagagaAAGAGGCTCTTCAATATTTATTTGGACagagagGAAGAGATTCA	GGAGAGAAGGGCATTTATGAGG	TGAATCTCTTCCTCTCTGTCCA	63	22	53	22	191	22	58.251	57.947	3.86	4.02	7.80223	F	198	AGAGGCTCTTCAATATTATTCTTTAAAGAGAATTTGAAGAGCGCACTTATGAGgagagaAGGGCATTTATGAGgagagaAAGaaaaaaGCTCTTCAATATTTATTGGAagagagagGgagagaTTCGACTAAATAAGgagagagagaAAGAGGCTCTTCAATATTTATTTGGACagagagGAAGAGATTCAAACTCTT
	M00842:287:000000000-BGGT4:1:1109:16877:24090	1	335	12	6	1	AG	GAGAGAGAGAGA	NA	1	1	2	3	90	TGAGTGTCTATATGTGCACGTGTATgagagagagagaGCTTGTTAATaaaaaaTTTAATAtttttGTGTAGAATGATCTTAAGCTGAGCT	TGAGTGTCTATATGTGCACGTG	AGCTCAGCTTAAGATCATTCTACAC	3	28	310	22	399	25	58.23	58.72	4.49	2.9	10.0494	F	419	TAAAATTACCCATTTTGCAATTTTAGAAGAATGGTTTAGTTCAACTGCTTAATGAGTGTTTAGCCATATAGGATGCAATAACTAGGTTAAATGACTTCTACTCGCTACGATTCCATTTCTAAATGCAGTTACGTTATGAATGGAAGTTCAAGGAACTTGTTTATGCTATGTGATAATTTCCTTGATACATGCATCTCTAATCTAAGCTTGGACTCCATCCTTTTGGATTCAAGATGAACTTGAGTTTTGACATGCCACAAAATGCTGTCAACTAATAATTGCATTGGAATTCataataataATTGCTTTTGAGTGTCTATATGTGCACGTGTATgagagagagagaGCTTGTTAATaaaaaaTTTAATAtttttGTGTAGAATGATCTTAAGCTGAGCT…
	M00842:287:000000000-BGGT4:1:1109:17553:25325	1	152	10	5	1	AT	ATATATATAT	NA	1	1	2	86	300	GCTATGTAGGGTCCAGGAGGGGTCTCATTGTACGCAGCCTTCTCCTACCATTACACCAAGGTCCACCCCTAGGCTGTAGTGAACTGCTCAAATAAGAatatatAAAatatatatatAATTACATGTTAttttttttATGTTTGAATATAAAGAtgtgtgGAGGAAATTCTTACTAGTCTGTAGAGCTCACAACCTCCTTGTTCCCTTTATCtttttAGAGTTGCAGGATACTTAGTATTTAGCAATGGTTGGGATTACCTATGAAAGAATGAGTAAATAGATCATCACCGATACCTGTCG	GCTATGTAGGGTCCAGGAGG	CGACAGGTATCGGTGATGATCT	86	162	46	20	345	22	58.657	59.446	4.3	2.75	3.89753	F	386	AACTACTCAAATaaaaaaaGGGTGGCCTGGTGCTGTGAAGCTCCTGCTATGTAGGGTCCAGGAGGGGTCTCATTGTACGCAGCCTTCTCCTACCATTACACCAAGGTCCACCCCTAGGCTGTAGTGAACTGCTCAAATAAGAatatatAAAatatatatatAATTACATGTTAttttttttATGTTTGAATATAAAGAtgtgtgGAGGAAATTCTTACTAGTCTGTAGAGCTCACAACCTCCTTGTTCCCTTTATCtttttAGAGTTGCAGGATACTTAGTATTTAGCAATGGTTGGGATTACCTATGAAAGAATGAGTAAATAGATCATCACCGATACCTGTCGGATAACTAAATTTTGTAATTATACAAAATTAGTTATTTATT
	M00842:287:000000000-BGGT4:1:1109:17786:22128	1	275	10	5	1	AG	CTCTCTCTCT	NA	1	1	3	46	146	TCCCAACTCTCGGCCATCTATTATTAAATGctctctTCTTTACTAGATCCTGTCAATTATTTTCATCTCActctctctctTCCCCTCGTCCAACGGAAAATATTTAAAGAAAGAAGGAGATGCACGCAACCATACTCCGGAGGTGC	TCCCAACTCTCGGCCATCTA	GCACCTCCGGAGTATGGTTG	50	46	205	20	350	20	60.033	60.462	1.98	3.77	0.494563	B	410	GATTTTAATTTTAGGAATCGGCTTAGACAAGTTTTGTTTCGAATTTATCTCCAAATTGATCCAACTTGATCCATGCATACCTCGGATCATTTTCCTCAAAAGAATTCTCTATTTCGGCTTCTCAATAATTATAAAACGAAAGGATAGAAGCATGCTGGTGTAAACTTCAATAACATCCAGCTAATTGAGGACCTACTCAGGTACTCCCAACTCTCGGCCATCTATTATTAAATGctctctTCTTTACTAGATCCTGTCAATTATTTTCATCTCActctctctctTCCCCTCGTCCAACGGAAAATATTTAAAGAAAGAAGGAGATGCACGCAACCATACTCCGGAGGTGCGGAAATCTTATGTACCTTCAGATGTCATAATTTGCGTTACATTAAtttt…
	M00842:287:000000000-BGGT4:1:1109:18068:18793	1	109	14	7	1	AG	TCTCTCTCTCTCTC	NA	1	1	8	32	171	tctctcCTCTTGCCCATCCAATTTCTTTCCCTTTCTAATTtctctctcCTAAtctctctctctctcCTCTTCCAGTTGACTTGATCAAGCTTTAGATCGAACTTGAATTGACTAAAATATTCATGTCCCATCTTTTAAAACAAATCAAATAGCTGATGTTGAGGAACACtt	TCTCTCCTCTTGCCCATCCA	AAGTGTTCCTCAACATCAGCT	32	84	57	20	227	21	59.957	57.501	3.41	4.24	3.54196	F	295	CTTTCCCATCCGAtctctctcCCCTTtctctcTTCTTTGctctctCCTTCTGAAtctctctcCTCTTGCCCATCCAATTTCTTTCCCTTTCTAATTtctctctcCTAAtctctctctctctcCTCTTCCAGTTGACTTGATCAAGCTTTAGATCGAACTTGAATTGACTAAAATATTCATGTCCCATCTTTTAAAACAAATCAAATAGCTGATGTTGAGGAACACtttttGACATCACCCTTAAAACaaaaaaTTGCCATCAACTTTAGAAGATCAAAGTTTTCATGGCTCCTCT
	M00842:287:000000000-BGGT4:1:1109:18668:14067	1	63	10	5	1	AC	GTGTGTGTGT	NA	1	1	2	5	94	AGCAAGAGATAGGCCGAGGTTATACCTGTGACTACTAGATTACTGGTGTAGGCCTCCTGgtgtgtgtgtGCAAGTACTCCGGCATCAGTTCCCT	AGCAAGAGATAGGCCGAGGT	AGGGAACTGATGCCGGAGTA	39	5	4	20	97	20	60.398	60.325	3.85	2.59	0.723112	A	381	ACTAGCAAGAGATAGGCCGAGGTTATACCTGTGACTACTAGATTACTGGTGTAGGCCTCCTGgtgtgtgtgtGCAAGTACTCCGGCATCAGTTCCCTATAACAAAATAACTTCTGTTGTTGCACCTAATTgtagtagtaCAAATGCTTGCATGACCCTCTATCATTGAGTACTAAGAAAGGTAGTACAAAAGTAACAGGCTATCATCTATTGACCATATTCTATAGCCCTTTATCTAATGCAAActctctTTTATTGCTAGATTCATCTCATATGATCCAACACTATAAGAAGGGACTCCAAAGGTGAGTACCTTTTCCTAGTGGAGGTAAATTCTTCTTAAAGATTTACGTTTCTTGAATATTCATAAAACTATAATGGG
	M00842:287:000000000-BGGT4:1:1109:18782:12681	1	65	10	5	1	AC	ACACACACAC	NA	1	1	9	42	141	GGCCTTGACAGCCGGGTTGCTCCGCCCCATTCTGCATTCGGTCTCCCGATAAACAGTAAAacacacacacaaaaaaaaaaaGATCCGATgaagaagaaTCGAGAAGAGCATATTaaaaaGTTGGTTTCCCTGTGAGTCACA	GGCCTTGACAGCCGGGTT	TGTGACTCACAGGGAAACCA	42	51	5	18	145	20	62.661	58.791	4.11	3.67	5.86964	F	145	GCTCGGCCTTGACAGCCGGGTTGCTCCGCCCCATTCTGCATTCGGTCTCCCGATAAACAGTAAAacacacacacaaaaaaaaaaaGATCCGATgaagaagaaTCGAGAAGAGCATATTaaaaaGTTGGTTTCCCTGTGAGTCACA
	M00842:287:000000000-BGGT4:1:1109:18825:7921	1	34	24	5	1.5	AG	TCTCTCCACACACACTCTCTCTCT	NA	1	1	4	5	102	TCctctctATCATCCTTActctctTTCTCTtctctccacacacactctctctctCACTGCTATTGGTGTAGACATCAAGATCaggaggaggTTATTGAGCCC	TCCTCTCTATCATCCTTACTCTCTT	GGGCTCAATAACCTCCTCCTG	5	27	4	25	105	21	57.599	59.858	2.85	3.86	8.54292	F	192	GAATCctctctATCATCCTTActctctTTCTCTtctctccacacacactctctctctCACTGCTATTGGTGTAGACATCAAGATCaggaggaggTTATTGAGCCCATTATGGATCTCAGACTGATCCAGTACAtttttCAGGATCACATAGTTATCAGTGCAGCACGAATTTTAGAGCAGCATAGATATAAG
	M00842:287:000000000-BGGT4:1:1109:19531:26528	1	164	12	6	1	AC	CACACACACACA	NA	1	1	10	70	199	TCCTCCATCTTCCCAATATAAAGCAACACCTCAATATAGTGACGGTATTTCTTGCTATACCTAGCGTGCTTGGAAGTCATCAAAATAGATGATTTcacacacacacaTACACATATTTCTTGCTATACCTAGCGTGCTTGAAAGTCATCAAAATAGATGATTTCagagagagGCACAGGCATAGGCACATGCATgcacg	TCCTCCATCTTCCCAATATAAAGCA	CGTGCATGCATGTGCCTATG	70	72	69	25	267	20	59.628	60.318	3.91	2.23	5.68988	F	326	TAAGGAAAAGcccccAGCTAAATGCTGGGaaaaaGGTTTCTACATTAAAACCTCTAAAATAATTTAGATCCTCCATCTTCCCAATATAAAGCAACACCTCAATATAGTGACGGTATTTCTTGCTATACCTAGCGTGCTTGGAAGTCATCAAAATAGATGATTTcacacacacacaTACACATATTTCTTGCTATACCTAGCGTGCTTGAAAGTCATCAAAATAGATGATTTCagagagagGCACAGGCATAGGCACATGCATgcacgcacgcacGCATGcacacacacacaCGCACATGcacacaTGcacacaATCAAGTCCATAT
	M00842:287:000000000-BGGT4:1:1109:20406:22814	1	189	17	5	1.5	AG	ATATATTTCTCTCTCTC	NA	1	1	2	21	141	TCTTTGGCAAGACACTTGGAACTAAGTCTATTTCATATTAGTGGTGTTCTCTTGATTATTTTGAATTCTGCCTTGACTGCatatatTtctctctctcTAAGCTTCAGAATCTTTGGAAACACCTAAAGTTGCTACGAGTGT	TCTTTGGCAAGACACTTGGAAC	ACACTCGTAGCAACTTTAGGTGT	58	21	109	22	249	23	59.312	59.931	3.62	4.16	5.75709	B	405	TATCTTAATGGTCAACTTAGTTCAGGATAAACCCAAATAACTTGATTGATGCTCaaaaaCACTAGTGTTATAAGAAGATTGATCATCTTTATCAGACATGAAAAGTCATCTTTGGCAAGACACTTGGAACTAAGTCTATTTCATATTAGTGGTGTTCTCTTGATTATTTTGAATTCTGCCTTGACTGCatatatTtctctctctcTAAGCTTCAGAATCTTTGGAAACACCTAAAGTTGCTACGAGTGTAAtttttATATCTTATTTATGCTTGCAAGGCTACCtttttAGGTAAGTGCATTCATCCTTTTATGTTAATATTTTATTATTCAACCCCGTTGAATAATCTGAGCAATACACTAGAGCTCGGACAAATAGTAGTCCAAGTTGTAGTCAATA…
	M00842:287:000000000-BGGT4:1:1109:2062:14188	1	87	14	7	1	AG	TCTCTCTCTCTCTC	NA	1	1	4	59	296	AGGTCATGTAATGCCAATTGTGAATGGAATAAAATAAATCttttttCTTCCAAAACCCTAGCCATCATCTCctctctctCCTtctctctctctctcATGTTCTTCTCTTCCAAAACACTTGTCCATCTTGAGGCGATCCCACAATCCATGCACAGCATTGTTCCCtttttCATGTTCCTATTCACGTGAAAGGAGGGAGTGCTTTATAGTTCACATAGTTGTTAACACGTGAAGTAAGGGGCGTTGCATCATCCCGTAGCACTATGCAATCCCATGAAAGGAAGATGGTGCACCGT	AGGTCATGTAATGCCAATTGTGA	ACGGTGCACCATCTTCCTTT	59	180	5	23	300	20	58.657	59.89	3.58	3.11	4.45372	F	334	AAATAGGTCATGTAATGCCAATTGTGAATGGAATAAAATAAATCttttttCTTCCAAAACCCTAGCCATCATCTCctctctctCCTtctctctctctctcATGTTCTTCTCTTCCAAAACACTTGTCCATCTTGAGGCGATCCCACAATCCATGCACAGCATTGTTCCCtttttCATGTTCCTATTCACGTGAAAGGAGGGAGTGCTTTATAGTTCACATAGTTGTTAACACGTGAAGTAAGGGGCGTTGCATCATCCCGTAGCACTATGCAATCCCATGAAAGGAAGATGGTGCACCGTTCACACTAGGACGTCTCCTAGTGACGTTACATGG
	M00842:287:000000000-BGGT4:1:1109:20690:12030	1	272	27	10	1.5	AG	AGAGAGAGAGAGAGAGAGAGAAGAGAG	NA	1	1	4	65	209	AGCACCAAGGTAGTCCAGGATCTTCATCCACGGGTCAACTCAAGTTCATAAATTTGGTCAATGGGATCCTATACTAGGATTCACAAACTTCTTAGAAagagagagagagagagagagAagagagAAACTAAATAGAGAAAGTGgagagagaAATAGCAAATCTTCATGAGgtgtgtCAGGAGACTTGCATGCCAGTTGAAAGTGGTCGA	AGCACCAAGGTAGTCCAGGA	TCGACCACTTTCAACTGGCA	77	65	175	20	383	20	60.179	59.821	3.86	4.92	0.358137	B	468	ATGTGATAGCATTTGGTAGCCCTGGATGAATCAAGTCAATCAGATCTAAGTAACTCGAACAGTGGATCATGAGGCATGGACTCGATCAGGGCTTAGATTATTCAAGAAACTCATTAATGAGGGCTTTCAGAGACATATAGTAAGATTAGGGTGATCAATTCAGTAAGTTGCCTGAGCACCAAGGTAGTCCAGGATCTTCATCCACGGGTCAACTCAAGTTCATAAATTTGGTCAATGGGATCCTATACTAGGATTCACAAACTTCTTAGAAagagagagagagagagagagAagagagAAACTAAATAGAGAAAGTGgagagagaAATAGCAAATCTTCATGAGgtgtgtCAGGAGACTTGCATGCCAGTTGAAAGTGGTCGATAGCtagtagtagTGG…
	M00842:287:000000000-BGGT4:1:1109:20796:18854	1	123	10	5	1	AG	AGAGAGAGAG	NA	1	1	3	31	139	AGCAAGGATCCTTCGATAGTCAAGTCAATAAGAGGGGCAACAATAAGAGAATAagagagagagAAAAGATGAAGTAGGGTAGAGTTCAAAGTATCCTCCTATGTTTTGAATGTTTCTCCCCTTCTGATGTTGGAGTTGG	AGCAAGGATCCTTCGATAGTCA	CCAACTCCAACATCAGAAGGG	31	55	70	22	208	21	58.7	58.56	3.41	3.95	5.7408	A	336	GATGATGTGGCATGGTCCCCATTTGGTTGGCATGACCAACAGGCAAGTTCTCTTGCCATATGTAGTTCCAGCAAGGATCCTTCGATAGTCAAGTCAATAAGAGGGGCAACAATAAGAGAATAagagagagagAAAAGATGAAGTAGGGTAGAGTTCAAAGTATCCTCCTATGTTTTGAATGTTTCTCCCCTTCTGATGTTGGAGTTGGGTCCTTTTGTAAGGTGCCTTTGGAGATTGTGATGACCATGGTCATATCAGGGGAGTGGCGACCTTTGTTATTTGGTGGCATTGACTGGTAGTAGCTATACTTGCTACAGAATAGCTTGTCGCTATCAT
	M00842:287:000000000-BGGT4:1:1109:21479:17976	1	357	10	5	1	AG	AGAGAGAGAG	NA	1	1	4	31	155	GTGGTGGGCTAGGATGGTTCCAACGACCAAAACGAGAAACCAGCAATGGAGGAAGAGAAGGaaaaaGAGGAAAAGAAAGAgggggggTGAAGGAagagagagagATAAACGCTGGCCCATAGAGGGCAGCGAAGGGCTAAGGGTCATGCCAAGGA	GTGGTGGGCTAGGATGGTTC	TCCTTGGCATGACCCTTAGC	74	31	263	20	417	20	60.107	59.744	3.62	3.09	0.363055	F	445	ACATATTTCTCAAAATGCTCACCAAATGCAAGGGCAATATCACCAAAGCATGAGAATAGGTTTGACATACTGCTAAAGCATGGTAGTGGAGAGGTCCTTCAAATGGGAAAACCTTTTCATCCGAGGCTTGGCAGATGTCACCAATCAAACCAACTTAGCAAACATGATAATCCTCAAAATTTTGTAAGCCCATTTCTAGATACTTATAGAACTTTGGCACATAGTGTGAACCATCCGATTCAGGGTGTCTCAAGCCATACCGGTGGTGGGCTAGGATGGTTCCAACGACCAAAACGAGAAACCAGCAATGGAGGAAGAGAAGGaaaaaGAGGAAAAGAAAGAgggggggTGAAGGAagagagagagATAAACGCTGGCCCATAGAGGGCAGCGAAGGGC…
	M00842:287:000000000-BGGT4:1:1109:21862:10891	1	153	10	5	1	AG	TCTCTCTCTC	NA	1	1	3	50	206	AACGGATGTGATTGGTGCCTATTCTGGCCACCCTTCTATGCCTATAAGTAGGCTTCCCCTTCAGTCATTCAGTAACATCCAGAATCCCAATTCAAGTAGAATTTTAAGCCTTCTAGAGTCCCTtctctctctcAATTTTCTTATTCCCtttttGTTCTTTTCGTATTGTGGAGAGTACAAACATCAATTGGTTCACTGTTCTTGTG	AACGGATGTGATTGGTGCCT	CACAAGAACAGTGAACCAATTGA	103	50	30	20	235	23	59.962	57.752	4.75	2.57	5.28567	F	239	GTGTGAATAGACGTGATGCAAGCACTTAAAACGGATGTGATTGGTGCCTATTCTGGCCACCCTTCTATGCCTATAAGTAGGCTTCCCCTTCAGTCATTCAGTAACATCCAGAATCCCAATTCAAGTAGAATTTTAAGCCTTCTAGAGTCCCTtctctctctcAATTTTCTTATTCCCtttttGTTCTTTTCGTATTGTGGAGAGTACAAACATCAATTGGTTCACTGTTCTTGTGATTT
	M00842:287:000000000-BGGT4:1:1109:22068:13802	1	64	10	5	1	AT	TATATATATA	NA	1	1	2	38	130	TCGGAAGTTGTGTCTGACCAATCATCATTTTGTCCTAGTAAGATTCtttttttCTTACtatatatataAAATAATAAGTTTTGCATAAAATTAATTCTATCCTAAGGTCAGCCTAGACCTAGATAGCTCC	TCGGAAGTTGTGTCTGACCA	GGAGCTATCTAGGTCTAGGCTGA	38	39	6	20	135	23	58.884	59.99	4.02	4.26	4.126	F	148	GTAGATCGGAAGTTGTGTCTGACCAATCATCATTTTGTCCTAGTAAGATTCtttttttCTTACtatatatataAAATAATAAGTTTTGCATAAAATTAATTCTATCCTAAGGTCAGCCTAGACCTAGATAGCTCCTAAATATTCTAAG
	M00842:287:000000000-BGGT4:1:1109:22441:8749	1	248	20	10	1	AG	GAGAGAGAGAGAGAGAGAGA	NA	1	1	4	46	291	ATTGTCTTGGCATTGCGCTGGGGTCGTCACCGGTGGTGGACGATGGATCTGCGACGGTCGGTGGTGATGGCGGGTGTTCACCGACAGATGGAGGCTAGTGGTTGGTCGTCCAGTTTGATGGAGGAGGCAGGTAGGTGGGGAATGCAAGGGAAACCCTCGCGTGAATGAGACtttttttGAGAAATAAACCCCAGACAGGGAGAGGgagagagagagagagagagaAACagagagagATagagagGGGGAGTGAGAACCAGAagagagAAAGAAAGCGAGGGTCAGGAGATC	ATTGTCTTGGCATTGCGCTG	GATCTCCTGACCCTCGCTTT	185	46	43	20	333	20	60.109	59.173	5.18	3.51	0.93636	F	333	GGGCATGGGGAAGACGGCAATGGACGGCGCACAACGGGACTAATTGTCTTGGCATTGCGCTGGGGTCGTCACCGGTGGTGGACGATGGATCTGCGACGGTCGGTGGTGATGGCGGGTGTTCACCGACAGATGGAGGCTAGTGGTTGGTCGTCCAGTTTGATGGAGGAGGCAGGTAGGTGGGGAATGCAAGGGAAACCCTCGCGTGAATGAGACtttttttGAGAAATAAACCCCAGACAGGGAGAGGgagagagagagagagagagaAACagagagagATagagagGGGGAGTGAGAACCAGAagagagAAAGAAAGCGAGGGTCAGGAGATC
	M00842:287:000000000-BGGT4:1:1109:22606:5437	1	28	10	5	1	AT	TATATATATA	NA	1	1	5	6	112	AATCCTTGGACCCTTTGCCCTCCATCtatatatataGTCAACTCCAATAGTCGAGATCGGCGTCAGTTCAAATGTACAGACTATAGAtctctcCACGTGTCATGAATCAAGG	AATCCTTGGACCCTTTGCCC	CCTTGATTCATGACACGTGGA	6	55	2	20	113	21	60.252	58.301	5.36	4.02	2.95104	F	220	GAATCCTTGGACCCTTTGCCCTCCATCtatatatataGTCAACTCCAATAGTCGAGATCGGCGTCAGTTCAAATGTACAGACTATAGAtctctcCACGTGTCATGAATCAAGGATTAGCaaaaaaGCAGTTATTACAAATCAATGGCCCTAGTTGGATGGATCGACCGAATCCCAACAACTCCACAAGGAGCTAATGGTCGGGCAACATGTCAACAACGG
	M00842:287:000000000-BGGT4:1:1109:22640:9461	1	77	26	5	1.5	AAAT	ATATATTTTATTTATTTATTTATTTA	NA	1	1	3	55	182	ACTCGGGATTCAGATCGTCTATTATTAAACAGTTTATTTTATGTTATTAAtttttATATTCTTTAATTTAGTAAAatatattttatttatttatttatttaTATGCTATTTTAAATTTTATCTAGATTAGCCTATGCCCCTGGGATGGGCCGTAATCTACAAATACACGGGCCATCCTCTTG	ACTCGGGATTCAGATCGTCT	CAAGAGGATGGCCCGTGTAT	55	61	2	20	183	20	57.94	59.53	4.18	2.29	2.52997	F	297	AACTCGGGATTCAGATCGTCTATTATTAAACAGTTTATTTTATGTTATTAAtttttATATTCTTTAATTTAGTAAAatatattttatttatttatttatttaTATGCTATTTTAAATTTTATCTAGATTAGCCTATGCCCCTGGGATGGGCCGTAATCTACAAATACACGGGCCATCCTCTTGAGATAGGTTGAGTTTAGTTAAGATTTAATTAAAATaaaaaTAAtttttGACTAGTCTATGCTAATGAGTGACAGGCTGTGATCTACGGATATACAGGCGTGCCTACATTAAGAT
	M00842:287:000000000-BGGT4:1:1109:22659:20725	1	51	12	6	1	AG	GAGAGAGAGAGA	NA	1	1	3	11	139	gAGACCGtcctcctccAGTAGCCTAACCAATgagagagagagaGGGACTGAAAGGAAGAAGTTTGGAATCTCATCAAATTTTCTTTGGGATCTCACCGGAGAAGAGCTATCAAGCCATGCCACTAGTGCCACCTGACTG	GAGACCGTCCTCCTCCAGTA	CAGTCAGGTGGCACTAGTGG	11	76	20	20	158	20	59.745	60.037	2.74	4	0.29227	F	257	AGATCTCCTCTATAAgggggAGACCGtcctcctccAGTAGCCTAACCAATgagagagagagaGGGACTGAAAGGAAGAAGTTTGGAATCTCATCAAATTTTCTTTGGGATCTCACCGGAGAAGAGCTATCAAGCCATGCCACTAGTGCCACCTGACTGAGGTAAAGACCTCCctctctTCCCTCTTTCTCTTGGCTAAAGATCACAGCCACCAACCATGAGGATGCCTGGCATGATCCTAGGATGCTTGATCGGCCA
	M00842:287:000000000-BGGT4:1:1109:23152:13117	1	89	10	5	1	AG	AGAGAGAGAG	NA	1	1	3	34	135	TGCACTGTATCACTTCAAATCCATCCTTTCATGCTTTTAGAATCAGAAGTTTGAACAagagagagagCAGATAAAATAACAAGTCATCAAATGCCATCATATTTATaaaaaaTGGGTTCATCAAGAAATCTGGGC	TGCACTGTATCACTTCAAATCCA	GCCCAGATTTCTTGATGAACCC	34	46	32	23	166	22	58.349	59.571	3.41	4.11	7.07926	F	422	GAACATCAATTTTGCTGGATTAACTAACCTATGCACTGTATCACTTCAAATCCATCCTTTCATGCTTTTAGAATCAGAAGTTTGAACAagagagagagCAGATAAAATAACAAGTCATCAAATGCCATCATATTTATaaaaaaTGGGTTCATCAAGAAATCTGGGCTTATTTAGCAGGTGACTATGGTGTGGGAGTGGAAAGCAAAAGTCCATTGATACATGGCTATATTCAAGATTATGGGTTGGTTACTATCCTaaaaaaTTGTTTCGCTtctctcACCATGCAGTTGCAACCATAAGACATACTGTGGCCATGCTATAATAGCCTGGTTCTCTAAATTACTGCCACAAACTACTCCCAAGGTGCTGGTCAACATTTTAGTAGCCAAAATATTTCCT…
	M00842:287:000000000-BGGT4:1:1109:23663:13225	1	176	24	12	1	AG	TCTCTCTCTCTCTCTCTCTCTCTC	NA	1	1	4	81	227	CCCTTGTTGGAGGCCACTAAAAGCCACAGATACTTTTGCTGTGGGGCCCAGGTCTGTTCCGGCCCTGCCACTGtttttGttttttttGGCACCAGCACCATtctctctctctctctctctctctcTACGTGGCCAAAGATGTAAGCTATAGATTGGTATCTGGGAAAAGATCACCACAAAAGGCCATCGCGGGGAGAGGCAAAAGAAGGCAGGGACCAGGAAAGAAA	CCCTTGTTGGAGGCCACTAA	TTTCTTTCCTGGTCCCTGCC	81	82	75	20	301	20	59.596	59.888	2.24	4.85	0.516453	F	325	TAGTCtttttCCATTGGcccccAGTTGGCAtttttGTCTGTACTGGAAATTTCCATCCACAGAAAAGGTGGGGCCCCTTGTTGGAGGCCACTAAAAGCCACAGATACTTTTGCTGTGGGGCCCAGGTCTGTTCCGGCCCTGCCACTGtttttGttttttttGGCACCAGCACCATtctctctctctctctctctctctcTACGTGGCCAAAGATGTAAGCTATAGATTGGTATCTGGGAAAAGATCACCACAAAAGGCCATCGCGGGGAGAGGCAAAAGAAGGCAGGGACCAGGAAAGAAATGAGCCACGAAGACGATAAGCCTA
	M00842:287:000000000-BGGT4:1:1109:23695:4604	1	316	18	9	1	AT	ATATATATATATATATAT	NA	1	1	4	4	93	ACCATGGGCCTAAGTACCTTAACTTTCAAGAACATTCTCTAACGTCACACCatatatatatatatatatGAATAGGGTGTAGATGAGGCTGCA	ACCATGGGCCTAAGTACCTT	TGCAGCCTCATCTACACCCT	31	4	265	20	357	20	58.019	60.619	3.5	4.34	2.59994	A	375	AATCTAGATAGAGATGTAGGTGTATTTTGAGTACATTTGGGCTTGTTCACAACCTAATTGATTATCCAATCAGGATTTCAAAATTAGATTTGGATTAGGCTTTCTTATGCATTGGATGTTGCAAAGGCTtctctcGCCGCTTAGAAATGGTTATACTAGAAAGCTTGTCCGACAAATCCTATGGAAATGGATAGATACATAGGTGTGCTATAGGTATTGAAGTAGCGGCAAAGAGGATAATTATaaaaaGaaaaaGATTCGAATACCATGGGCCTAAGTACCTTAACTTTCAAGAACATTCTCTAACGTCACACCatatatatatatatatatGAATAGGGTGTAGATGAGGCTGCAATTGGaaaaaTCTACAAT
	M00842:287:000000000-BGGT4:1:1109:23741:14176	1	290	18	6	1	AAG	AAGAAGAAGAAGAAGAAG	NA	1	1	7	0	232	GTTAGGTGAGTGGGCTTGGGGCAGTGCTAGAGGCTATTGTTGGGAGGAGTTGACTGGAGAATCGGGAGCTAGGAGGTATCAGTAGGTTGGATCTAATGGGTTGGCTGGGTGAGGACTTGTAGGCACTGGGGATTCAAAGGATTAGAATAGCCAAGAGAAGTCGGAaagaagaagTaggaggaggAGTAGAGGAaagaagaagaagaagaagGGCAATTGGGAAagagagGaa	GTTAGGTGAGTGGGCTTGGG	TTCCTCTCTTTCCCAATTGCC	173	0	97	20	328	21	60.323	58.192	4.12	4.52	3.13022	F	332	CATGTGTTAGTTGGGGCCAGGCAGAAATGGAATGGTTTGCGGTGGAGATGGGAGCAACGAGTGGAGTCAGCTGGGAGCAGAACTAGAGTCTCAATAGTTAGGTGAGTGGGCTTGGGGCAGTGCTAGAGGCTATTGTTGGGAGGAGTTGACTGGAGAATCGGGAGCTAGGAGGTATCAGTAGGTTGGATCTAATGGGTTGGCTGGGTGAGGACTTGTAGGCACTGGGGATTCAAAGGATTAGAATAGCCAAGAGAAGTCGGAaagaagaagTaggaggaggAGTAGAGGAaagaagaagaagaagaagGGCAATTGGGAAagagagGaaaaaG
	M00842:287:000000000-BGGT4:1:1109:25477:9069	1	190	10	5	1	AG	CTCTCTCTCT	NA	1	1	4	47	195	AATCGCTAGCGGAAACCTCCAAAGAGATGCTACCAGCTAtctctcCTTCCCTCCTTCCCTCCCTATGCTCCAAGATACGCGAAGAGACAAAAGAGGGAACCCTTACCCACGCGCACAGctctctctctCCCTTTCTGtctctcCctctctTTCTATTTATATCTAAAATTGCAGTAGAAAGCGAGCTCCGAGATG	AATCGCTAGCGGAAACCTCC	CATCTCGGAGCTCGCTTTCT	98	47	72	20	266	20	60.179	59.898	4.3	2.52	0.281201	B	472	CTGAAATCTGGTACaaaaaaaGCCCTCGAATTCAAAATTTTCTCACCTTCTTCGACCTCGACAGCTCCTCGAATCGCTAGCGGAAACCTCCAAAGAGATGCTACCAGCTAtctctcCTTCCCTCCTTCCCTCCCTATGCTCCAAGATACGCGAAGAGACAAAAGAGGGAACCCTTACCCACGCGCACAGctctctctctCCCTTTCTGtctctcCctctctTTCTATTTATATCTAAAATTGCAGTAGAAAGCGAGCTCCGAGATGCGAAGATATCCGCAGCTCGGGCCGGAGAATCGGAATGCCGGCGATACCGCGGCGATATTTCGGCGGGCTACCGATAtttttGAAGTCCAGAAACGGTAAGAATCCGGcccccGTTTTCCCTGATGGCCAGATA…
	M00842:287:000000000-BGGT4:1:1109:25889:12708	1	149	12	6	1	AG	AGAGAGAGAGAG	NA	1	1	4	58	240	AATCTCCAGGTGgtgtgtAGTGATGTAGTTGTGATCTTCCTCCAGAAGGTATAGAATCTTGCAAAGAAGTCTTCTAGCCAGATATAGTTCTGACAAGGATCCTTTAATGCTCAAGTTAGTAAGATGGGCAATAGTAGCAAAAGAGAagagagagagagTGTGTTAGAGTTTAGAGTATCTGTGGAGAAATAGAAGGGAAGAAGTCTTGCCCACACTTGGGTTGAATTGACCTATCTGGAG	AATCTCCAGGTGGTGTGTAGTG	CTCCAGATAGGTCAATTCAACCCA	124	58	3	22	242	24	59.697	60.08	2.74	4.51	6.38338	F	245	ATAATCTCCAGGTGgtgtgtAGTGATGTAGTTGTGATCTTCCTCCAGAAGGTATAGAATCTTGCAAAGAAGTCTTCTAGCCAGATATAGTTCTGACAAGGATCCTTTAATGCTCAAGTTAGTAAGATGGGCAATAGTAGCAAAAGAGAagagagagagagTGTGTTAGAGTTTAGAGTATCTGTGGAGAAATAGAAGGGAAGAAGTCTTGCCCACACTTGGGTTGAATTGACCTATCTGGAGATG
	M00842:287:000000000-BGGT4:1:1109:2663:12077	1	63	18	9	1	AC	TGTGTGTGTGTGTGTGTG	NA	1	1	3	2	256	CAGATATTATCATGTCGTGGTTTCATAtgtgtgtgtgtgtgtgtgTATTTGTTATCTACAttttttATCATCAATTATCTTTCTGATTTGGACTATTTATAATTACACTTTAGCACATGGCTGACAAACTATAATCCATGCTTTGGCCTGTGGTGGTAAACTATAATCTGTACTTTAGACCATGGTGCCAAACCAAAATATCTATACTTCAATCTATGGTGGCAAATCAAATTAGCTGCATTTCAGATAGCAAACG	CAGATATTATCATGTCGTGGTTTCA	CGTTTGCTATCTGAAATGCAGC	2	189	36	25	291	22	57.286	58.896	2.69	5.25	10.8175	F	383	AAATGTATATCATAGAATTCATTCCAGAAACATATCAGATATTATCATGTCGTGGTTTCATAtgtgtgtgtgtgtgtgtgTATTTGTTATCTACAttttttATCATCAATTATCTTTCTGATTTGGACTATTTATAATTACACTTTAGCACATGGCTGACAAACTATAATCCATGCTTTGGCCTGTGGTGGTAAACTATAATCTGTACTTTAGACCATGGTGCCAAACCAAAATATCTATACTTCAATCTATGGTGGCAAATCAAATTAGCTGCATTTCAGATAGCAAACGAAATTAGTTACACTTCAATCCATAGTTGCAAACCATAGTCCATGCTTCAGCCCATTGTGGCAAACCAAAGTATCTGCACTCTGACCTGTGTT
	M00842:287:000000000-BGGT4:1:1109:26806:10970	1	69	14	7	1	AG	CTCTCTCTCTCTCT	NA	1	1	4	46	190	ACTATAGCGGAGAAGAAGTGGAAGAGAACAATAGAGCGAGAGGGAAGGAGGGTAGAGGGTTTCCTTCCctctctctctctctCAGTCTCCTCAGAAATCACATGGCCCCTCCCTGTTCCGTCTCGGGAGCTCCCCAGAACATTATgggggCTCCgagagactctctTTGCATGCACGCACAGGCAATCAT	ACTATAGCGGAGAAGAAGTGGA	ATGATTGCCTGTGCGTGCAT	46	88	1	22	190	20	58.1	61.317	4.02	3.96	5.21716	F	191	ACTATAGCGGAGAAGAAGTGGAAGAGAACAATAGAGCGAGAGGGAAGGAGGGTAGAGGGTTTCCTTCCctctctctctctctCAGTCTCCTCAGAAATCACATGGCCCCTCCCTGTTCCGTCTCGGGAGCTCCCCAGAACATTATgggggCTCCgagagactctctTTGCATGCACGCACAGGCAATCATG
	M00842:287:000000000-BGGT4:1:1109:3137:11560	1	63	18	9	1	AG	CTCTCTCTCTCTCTCTCT	NA	1	1	3	41	290	CAAGACTCACAGTGGAGTCCAGACAAAATAGAGaaaaaCTCTccccctctctcACTCACAAGctctctctctctctctctCCCTccccccTCTTTCTCTTGCTCCCTTCAGTGTTTCCCCTAGGATTTACCACTGCCCTAGAGTGCACTGCCATCATCGGTGCTAGGGACCATCTTGATCGAGGTGGAAATAAAGGTAAGGATGCCAACCGACCCTtctctcTTGCTTTTGAGTGTTTTGAGGCTGGATGATGGAGTTTTGGCAATGAGGAAAGGATGAAGAAGGCTAAT	CAAGACTCACAGTGGAGTCCA	ATTAGCCTTCTTCATCCTTTCCTCA	41	185	1	21	290	25	59.311	59.807	4.02	3.86	6.88126	F	311	CAAGACTCACAGTGGAGTCCAGACAAAATAGAGaaaaaCTCTccccctctctcACTCACAAGctctctctctctctctctCCCTccccccTCTTTCTCTTGCTCCCTTCAGTGTTTCCCCTAGGATTTACCACTGCCCTAGAGTGCACTGCCATCATCGGTGCTAGGGACCATCTTGATCGAGGTGGAAATAAAGGTAAGGATGCCAACCGACCCTtctctcTTGCTTTTGAGTGTTTTGAGGCTGGATGATGGAGTTTTGGCAATGAGGAAAGGATGAAGAAGGCTAATTAGCTGAGTGGAGCCTTCACA
	M00842:287:000000000-BGGT4:1:1109:6282:9027	1	89	10	5	1	AT	ATATATATAT	NA	1	1	3	20	241	CAAACTAACCCAGCTTATACTTTGGGATTTATGAGTGAGCTAAAAatatatatataaaaaTAGATATACACCCCAATCCCCATATACCCATGCATACACCCAGGTAAAATGAAATAAAATAAGatatatGAACCATATAGATCTACATCaaaaaTAGTGCTAGATGATGACCTTATCAATAGTATGATCTGCAATAGAAATAGTGTTAGATGATGTCCTCATCAATTTCTCCTAGGGTGGG	CAAACTAACCCAGCTTATACTTTGG	CCCACCCTAGGAGAAATTGATGA	20	163	44	25	284	23	58.147	59.54	3.28	2.92	10.3123	F	309	AATAAAtttttAACAAATTCCTAACAAACTAATAAATTCTTAACAAACTAACCCAGCTTATACTTTGGGATTTATGAGTGAGCTAAAAatatatatataaaaaTAGATATACACCCCAATCCCCATATACCCATGCATACACCCAGGTAAAATGAAATAAAATAAGatatatGAACCATATAGATCTACATCaaaaaTAGTGCTAGATGATGACCTTATCAATAGTATGATCTGCAATAGAAATAGTGTTAGATGATGTCCTCATCAATTTCTCCTAGGGTGGGaaaaaCTTGACTCCATCGAGTCAGG
	M00842:287:000000000-BGGT4:1:1109:7072:10276	1	76	61	7	2	AAG	AGAAGAAGAAGAAGAAGAAGAAGCAGCAGCCAGGGAGGAGAAGAGAAAGAAGAAGAAGAAG	NA	1	1	11	23	172	TGGCTAGGAGGAAAGAGGCTAGGAATGTTAGATGATGGAAGGAAGCTATGAGTATTGGGAGTTTTAGagaagaagaagaagaagaagaagcagcagcCAGGGAGGAGAAGAGAaagaagaagaagaagGGGAGGagaagaagaagaGGAATAAGAGAAGCAGTGGAAGAGGA	TGGCTAGGAGGAAAGAGGCT	TCCTCTTCCACTGCTTCTCTT	47	23	9	20	180	21	59.957	58.386	4.58	2.85	2.65759	D	241	GCAGGAGTTGGCTAGGAGGAAAGAGGCTAGGAATGTTAGATGATGGAAGGAAGCTATGAGTATTGGGAGTTTTAGagaagaagaagaagaagaagaagcagcagcCAGGGAGGAGAAGAGAaagaagaagaagaagGGGAGGagaagaagaagaGGAATAAGAGAAGCAGTGGAAGAGGAAAACTAGAATTCTATTCCTTTCTTTCTGTGTCtttttttttttttCCATTACACAACTCCT
	M00842:287:000000000-BGGT4:1:1109:7170:8253	1	135	12	6	1	AG	AGAGAGAGAGAG	NA	1	1	2	77	240	aTGCTGAAGTGGCTGTTGTCTCCCTCAGGGAAGCACAAGAACTTGCAAAGAAGACCTCTGGCCAAATATAGCTCCATCAAGGACCCTCTGACACTCAAGTCAGTAAGATGGACaataataatGAAAagagagagagagACAGACAGAGAATATAGAGTAAACTTTTATTAGCTTTTCTTGCTGGTGATGATGGCAGAGGGTCCtttttATAGAGTCAGTTGGTGAGTATGAAAGGAATCT	ATGCTGAAGTGGCTGTTGTC	AGATTCCTTTCATACTCACCAACTG	106	77	9	20	248	25	58.758	58.824	3.18	3.16	7.41826	F	262	GGTGaaaaaTGCTGAAGTGGCTGTTGTCTCCCTCAGGGAAGCACAAGAACTTGCAAAGAAGACCTCTGGCCAAATATAGCTCCATCAAGGACCCTCTGACACTCAAGTCAGTAAGATGGACaataataatGAAAagagagagagagACAGACAGAGAATATAGAGTAAACTTTTATTAGCTTTTCTTGCTGGTGATGATGGCAGAGGGTCCtttttATAGAGTCAGTTGGTGAGTATGAAAGGAATCTTTTCTGTTAGAAGC
	M00842:287:000000000-BGGT4:1:1109:7360:11345	1	115	19	5	1.5	AG	AGAGAGAGAAGAGAGAGAG	NA	1	1	3	91	298	GACCTCTATAATGGGCCAGGCCAAGGCCCATTACAAGTATGGCAGTGGGCATTCCCACCCACTGCTTCATATCCCCTcccccTTCTGGTGCATGTATGCTGATGCACATGAAagagagagAagagagagagTCTCCCTTTGTTTCttttttCTCTTTAGCCAGCTGTAGGCCAGCACTCATCTTTGGTAGCCTCAGCTGCCACCGGGGTAGCATTGGGGTTGGaaaaaaaGTCAGCCGGCCCTTTGGTTGGCCAACATGCACTCAATTTGGCTTTATGGCTAAGTGGCTTCTTATGGC	GACCTCTATAATGGGCCAGGC	GCCATAAGAAGCCACTTAGCC	91	146	3	21	300	21	59.996	59.05	4.85	3.93	2.95391	F	323	CAGACCTCTATAATGGGCCAGGCCAAGGCCCATTACAAGTATGGCAGTGGGCATTCCCACCCACTGCTTCATATCCCCTcccccTTCTGGTGCATGTATGCTGATGCACATGAAagagagagAagagagagagTCTCCCTTTGTTTCttttttCTCTTTAGCCAGCTGTAGGCCAGCACTCATCTTTGGTAGCCTCAGCTGCCACCGGGGTAGCATTGGGGTTGGaaaaaaaGTCAGCCGGCCCTTTGGTTGGCCAACATGCACTCAATTTGGCTTTATGGCTAAGTGGCTTCTTATGGCTTTCGAGCTCCCCGGTAGCCACC
	M00842:287:000000000-BGGT4:1:1109:7805:9053	1	152	18	6	1	AAT	ATTATTATTATTATTATT	NA	1	1	4	27	165	GGTTCTGGTTCCCATGCTCATCCAGCAATAGGTAATACAATACACATTCACCAATATAATTCTATAATAACAACaaaaaTCTTGTACACATGATGTTTCCattattattattattattATAGACATGGAAAATGGGACCCCATTCAGCTGCACAACACTGTAGCA	GGTTCTGGTTCCCATGCTCA	TGCTACAGTGTTGTGCAGCT	80	27	52	20	216	20	59.962	60.179	4.26	4.24	0.217214	F	327	GTAATCGAACTGTAGTTACTTGTAACCTTAGCTAAAATGGACTCGGTCATTGGTTCTGGTTCCCATGCTCATCCAGCAATAGGTAATACAATACACATTCACCAATATAATTCTATAATAACAACaaaaaTCTTGTACACATGATGTTTCCattattattattattattATAGACATGGAAAATGGGACCCCATTCAGCTGCACAACACTGTAGCATTAGAAAACagagagagAACAAACTCTTaaaaaaCTAGCAACATGATTGaataataatCTGGTAATCCCATCTAAAGATGCATCCCTAAAATGTAATTTGGGAGGAACAAG
	M00842:287:000000000-BGGT4:1:1109:8057:9442	1	79	10	5	1	AG	AGAGAGAGAG	NA	1	1	5	20	104	CTCTTAAGAAACCACAATTCTTCCTTAAAAGAGATTCATACGTGAagagagagagGGAATCAGTCTCCATATTTTCTTAGACTCCACAACGTGTGGAACTCTCC	CTCTTAAGAAACCACAATTCTTCCT	GGAGAGTTCCACACGTTGT	20	30	34	25	137	19	57.248	57.319	3.36	3.32	11.4326	A	238	CAAAACGTGTGGATACTTTTAAGAggtggtggtCTCTTAAGAAACCACAATTCTTCCTTAAAAGAGATTCATACGTGAagagagagagGGAATCAGTCTCCATATTTTCTTAGACTCCACAACGTGTGGAACTCTCCaaaaaaTCATTTCATGGAGAGGGACTCTAAGGGACTCCTATTTAAAAGCAGTCCCTTGTaaaaaCTGGTGATTAGTCCaaaaaTAAAGGGgagagagaCGT
	M00842:287:000000000-BGGT4:1:1109:8353:14132	1	120	10	5	1	AG	AGAGAGAGAG	NA	1	1	3	51	190	TGAGAGCTACACTGAGGAGGTATTTTGTTTCCGCTGAATCAAAGATGCTGAtttttGCTTAGATCTAATTTCTCATTATTGTTCTGTTCCGCTTGTTGTGTTGTTCATagagagagagATGCAGAGGCCAGCAAGATTTCTGGGATGACAAGAAGCAGGAGTGCATCCACTGGGCATATCATGTGTCCCA	TGAGAGCTACACTGAGGAGGT	TGGGACACATGATATGCCCAG	87	51	12	21	201	21	59.644	59.857	3.85	4.45	2.49954	F	210	CATGATAATGATGAGAGCTACACTGAGGAGGTATTTTGTTTCCGCTGAATCAAAGATGCTGAtttttGCTTAGATCTAATTTCTCATTATTGTTCTGTTCCGCTTGTTGTGTTGTTCATagagagagagATGCAGAGGCCAGCAAGATTTCTGGGATGACAAGAAGCAGGAGTGCATCCACTGGGCATATCATGTGTCCCACTTCATTGC
	M00842:287:000000000-BGGT4:1:1109:8730:12244	1	177	22	11	1	AT	ATATATATATATATATATATAT	NA	1	1	4	90	248	ttGCAGGTCGAAGCTCTAGCACCCaaaaaaaTTAAAGGCAGATGCCACATCTGATTGGCCACTTCATCCTATTGACATCATCCGGTGCCAAGCACAGTGAAACTCTGGCAatatatatatatatatatatatAACAATTCATGGATAGCATCTTGAGTAGTTATTGTATAAGTATTTTGCGCTTATCTTTCTAATGATTAATCTAAGATTGTGAAATATTCTACAGCAACTGCCATCCATGCATCCaa	TTGCAGGTCGAAGCTCTAGC	TTGGATGCATGGATGGCAGT	90	96	67	20	314	20	60.109	60.033	3.42	4.4	0.141526	F	320	AGATCGGAAGAGCTGACTTGAGTATCGAAGGTTCTTCACCGGAGATAAtttttGGTAGAGGACtttttGCAGGTCGAAGCTCTAGCACCCaaaaaaaTTAAAGGCAGATGCCACATCTGATTGGCCACTTCATCCTATTGACATCATCCGGTGCCAAGCACAGTGAAACTCTGGCAatatatatatatatatatatatAACAATTCATGGATAGCATCTTGAGTAGTTATTGTATAAGTATTTTGCGCTTATCTTTCTAATGATTAATCTAAGATTGTGAAATATTCTACAGCAACTGCCATCCATGCATCCaaaaaaCT
	M00842:287:000000000-BGGT4:1:1109:8752:27277	1	116	10	5	1	AG	GAGAGAGAGA	NA	1	1	2	69	294	TGAGAGTCATGTTAGGCCAAGAACTCAACAGCAATGGAACTATCGTTAAGACAAAGGAACGGTGAATGTTTCAGATTTTGTTTTAAAGTGGgagagagagaATTGGAGAATACGGATGTAtttttttGGAGGTACCATTTGAGTTACTTCGAAGAACAGTTCAGATTGTTGTAGTTTATTTGAGACTGTAGTTGAGGTGTCACCCAAGTAGATTTCTTCGTCTCCATTACAATTTTGTGAAGTCTGGAAAATTTACATGGATATGAGAAAGCCTGCATTAGTACTAGTAAGTGG	TGAGAGTCATGTTAGGCCAAGA	CCACTTACTAGTACTAATGCAGGCT	69	168	25	22	318	25	58.827	59.931	3.02	4.58	8.2424	F	346	CGGTAGATCGGAAGCTAATAGATTTGAGAGTCATGTTAGGCCAAGAACTCAACAGCAATGGAACTATCGTTAAGACAAAGGAACGGTGAATGTTTCAGATTTTGTTTTAAAGTGGgagagagagaATTGGAGAATACGGATGTAtttttttGGAGGTACCATTTGAGTTACTTCGAAGAACAGTTCAGATTGTTGTAGTTTATTTGAGACTGTAGTTGAGGTGTCACCCAAGTAGATTTCTTCGTCTCCATTACAATTTTGTGAAGTCTGGAAAATTTACATGGATATGAGAAAGCCTGCATTAGTACTAGTAAGTGGGCTAATTAATTCTATAATCATCGAGTTT
	M00842:287:000000000-BGGT4:1:1109:9095:12923	1	42	10	5	1	AG	AGAGAGAGAG	NA	1	1	4	0	130	AGCTCTTGCCGTTGATCAGTagagagagagGGGAGATACatatatAAATAagagagTTTAAGAATGGTATCTACTCATGctctctctGTAAATGGAGGAAGGAGAAGATGAACAGGGTCCAGTGACTGTG	AGCTCTTGCCGTTGATCAGT	CACAGTCACTGGACCCTGTT	0	80	22	20	151	20	59.677	59.53	3.41	3.16	0.792892	B	198	ATCATCGTAGGTGTAGCCTCTAGCTCTTGCCGTTGATCAGTagagagagagGGGAGATACatatatAAATAagagagTTTAAGAATGGTATCTACTCATGctctctctGTAAATGGAGGAAGGAGAAGATGAACAGGGTCCAGTGACTGTGGAGCTGGGCTAAAAGTCCTCTTGCTGCTGATGGTAATATCCTCTTCA
	M00842:287:000000000-BGGT4:1:1109:9273:4682	1	70	10	5	1	AG	TCTCTCTCTC	NA	1	1	4	23	125	AATGCTCCAGTCCCTGAGGAGTTAAGGGAGGTAGTACTGACTAtctctctctcAGATGAggtggtggtAGTGGAGCCACCTTTTGCATTAGCTTTAGCTACTGAAGAGACTCATCAACGGTCGGC	AATGCTCCAGTCCCTGAGGA	GCCGACCGTTGATGAGTCTC	23	52	27	20	151	20	60.253	60.803	3.71	3.36	1.05549	B	309	GGAGTAGTGCTCTAGCTGAGGGGAGCAATGCTCCAGTCCCTGAGGAGTTAAGGGAGGTAGTACTGACTAtctctctctcAGATGAggtggtggtAGTGGAGCCACCTTTTGCATTAGCTTTAGCTACTGAAGAGACTCATCAACGGTCGGCGATGCCTGAGCGAGCAGCAACACCTCCCACCCCTAGGTCTATAGAGGAGTAAGCATAGTCAGGCTTAGaaaaaTCCAACTTTCAGGACCCTAAAGTAGCTCGACAGCTTCTAAGGGGTGCTATCCTCCCAAGAGACTGGGAGGAGACCGTATCCTACC
	M00842:287:000000000-BGGT4:1:1109:9705:20309	1	134	10	5	1	AG	CTCTCTCTCT	NA	1	1	3	43	199	GGCTTACTTGGCTAGCACCTCATATGTATTATTCATAACTATTATTCTTGCCAAAAGATGTCCctctctctctCCAAATAAATGCTCTGTATTCCCTGTCaagaagaagCGAGATCTGAACTCCCCTTtctctcCAAATTGAGATATGAACTCCCCTCTCCCTCCAAATAATATCCTAAGGAGTCATTAAATGCTCTCC	GGCTTACTTGGCTAGCACCT	GGAGAGCATTTAATGACTCCTTAGG	43	101	71	20	269	25	59.747	59.005	4	2.69	6.248	B	440	CAGCAATAATATTTATGTTCTTTCGTTACCTTTATACTTTCGTTCCAACTTTTATTCATAACGAAATAGTGGCTTACTTGGCTAGCACCTCATATGTATTATTCATAACTATTATTCTTGCCAAAAGATGTCCctctctctctCCAAATAAATGCTCTGTATTCCCTGTCaagaagaagCGAGATCTGAACTCCCCTTtctctcCAAATTGAGATATGAACTCCCCTCTCCCTCCAAATAATATCCTAAGGAGTCATTAAATGCTCTCCTAAAGGAAAACATGTTGGGAtctctcTTGTAATCGAAGTATGAAAACCAAAGTAAGCACATCgagagagaATTAAGAGCCGATCCAAGTATCAAACCTCTTCAGCCGCTGAACTGGGTTCCCTACCGAGC…
	M00842:287:000000000-BGGT4:1:1109:9788:24760	1	117	10	5	1	AT	ATATATATAT	NA	1	1	3	42	147	GGCGGTGTGACAATTGGTACAAATTATACTCTAATAATTAACAGCAAAACTAAAAGTGCTATCACATCTACatatatatatTCCAAGttttttAAACATTAAATAAGCATAGTATGGTACAATTGATATGCTATGGTTAACCTTCCT	GGCGGTGTGACAATTGGTAC	AGGAAGGTTAACCATAGCATATCA	51	42	46	20	192	24	59.48	57.236	3.34	2.15	7.28368	F	204	CATCACAACCATCTCACCAAAAGTGaaaaaTTTGGGTCCACTAGAGGCGGTGTGACAATTGGTACAAATTATACTCTAATAATTAACAGCAAAACTAAAAGTGCTATCACATCTACatatatatatTCCAAGttttttAAACATTAAATAAGCATAGTATGGTACAATTGATATGCTATGGTTAACCTTCCTATACATACCTTA
	M00842:287:000000000-BGGT4:1:1110:10122:26260	1	55	10	5	1	AG	GAGAGAGAGA	NA	1	1	4	3	152	CTGAAACTTAAGCAACACGAGTAGTgagagagagaCCACAAGTACTTATTGCACTGAATGAAGGCGTTTTGATTGATTGTGGGATTTCTTGACAATCAAAGGGTTCTTTAACCATGCATTGTTCAAAACTACTGAGATGGGTCATTGCATGA	CTGAAACTTAAGCAACACGAGT	TCATGCAATGACCCATCTCAGT	3	95	30	22	181	22	57.204	59.76	4.18	3.41	7.03638	A	312	CAATAAAGCTCATACAATTCAACTTTATTCTGAAACTTAAGCAACACGAGTAGTgagagagagaCCACAAGTACTTATTGCACTGAATGAAGGCGTTTTGATTGATTGTGGGATTTCTTGACAATCAAAGGGTTCTTTAACCATGCATTGTTCAAAACTACTGAGATGGGTCATTGCATGAGTTAGATATGAAGGGCCATAtttttCTCAAGAAAAGTGCCACAAGTTGCCaaaaaGGGGACACTGTAATTGGTACTATTGATGGATAAGGAGAGCAGATGAGAAGTTTTGAAGGGTATAGATTAGCCTAAG
	M00842:287:000000000-BGGT4:1:1110:10232:22228	1	410	16	8	1	AG	TCTCTCTCTCTCTCTC	NA	1	1	4	0	101	TGGACCCGGAAGATCTCCTTAGGACTTATCACTTCGGTACCAGGGAAAGCACCCCGCACTCTTtctctctctctctctcCAAACTCTAACATCGGGCTAGT	TGGACCCGGAAGATCTCCTT	ACTAGCCCGATGTTAGAGTTTG	43	0	347	20	447	22	59.957	57.875	3.36	2.93	4.16758	A	448	CAGGATAAGGTCAGCTAGGAAAGGGTACTGATCTGGGGtttttCAAACCCCATGCACTGTGCACATGCTTGGGGCCAtgtgtgCTGATCATGGTATGACATCGGCCCTcacacaTGGCAGGAGCCCTGGGACACATCCGATCTCCGATGACAGAGGACGTCGAGACAGACATCTCTAGAAGTATCGATGAATAGGGGACACCCTTACACTCGGCTcccccTTGGATCGATCTcccccAAATCGGTCTCCCCTAGATTGGTCTCCCTTTGATCGGTCTCCCTTAGATCGATTTCCCTCGCACTGGACTCCCTTAGATCGGGCTTCCTCACATCAGGTTCCCTTACATTGGACCCGGAAGATCTCCTTAGGACTTATCACTTCGGTACCAGGGAAAGCACC…
	M00842:287:000000000-BGGT4:1:1110:10648:26655	1	46	14	7	1	AG	CTCTCTCTCTCTCT	NA	1	1	3	8	199	GTTGTCCTGCACCGATTTGGTATTTATActctctctctctctTGATAGAAAGAGCACATCAATGATGTGCTACACAGCAGGAGATAGACCTCCTCTAGATATTTTGTCCCTCACAAGCTCTAATAAGAATGGGATTCTATCTCATATTATTTGACCCAAACAATTaaaaaaCTTTATCAGCCTATTGTTTGTCCTTCAA	GTTGTCCTGCACCGATTTGG	TTGAAGGACAAACAATAGGCTGA	8	134	18	20	216	23	59.759	58.276	3.28	4.26	4.96534	F	407	ctctctctCCAAGTTTTGTTGTCCTGCACCGATTTGGTATTTATActctctctctctctTGATAGAAAGAGCACATCAATGATGTGCTACACAGCAGGAGATAGACCTCCTCTAGATATTTTGTCCCTCACAAGCTCTAATAAGAATGGGATTCTATCTCATATTATTTGACCCAAACAATTaaaaaaCTTTATCAGCCTATTGTTTGTCCTTCAATGTAATTATTTAtttttGAAAATGTAGAACCGGTATGATCATCTTGATCTTTAATCAAGCAttttttATGATCAAGACTCAATCATTCAGCCTGCTAATCTATATTATCGCTGAATTCTATCTGTTTGGCAAGATTCTTATCTTTTGTATAATTTTAATGGCTAAATTCTATTCAAACTTTAC…
	M00842:287:000000000-BGGT4:1:1110:11926:18680	1	175	20	10	1	AG	GAGAGAGAGAGAGAGAGAGA	NA	1	1	4	43	216	TGCTTGTCTTGCTtgtgtgAATAATTTTGACTGTGTCGATTTCGCATTCTTTTCGGTAAATAAAGAATGGATTTTATATTGATGTGGACATCCACTTCAGTCGTGACTGAGCGGAGTTTGCTCCAGTAGTGGTgagagagagagagagagagaGTCGGCAAACAGATAAGATGAGAGGTAAGGGAAGGATAGCAATTGGCTGAGAGGATTCCAAGC	TGCTTGTCTTGCTTGTGTGA	GCTTGGAATCCTCTCAGCCA	113	43	42	20	257	20	58.251	59.746	3.58	4.75	2.00313	F	300	AGATATTAAGTAATCCATACCTTCGTATGCTTTCCTCTATCTGCTTGTCTTGCTtgtgtgAATAATTTTGACTGTGTCGATTTCGCATTCTTTTCGGTAAATAAAGAATGGATTTTATATTGATGTGGACATCCACTTCAGTCGTGACTGAGCGGAGTTTGCTCCAGTAGTGGTgagagagagagagagagagaGTCGGCAAACAGATAAGATGAGAGGTAAGGGAAGGATAGCAATTGGCTGAGAGGATTCCAAGCCGAGTTTGAGTTCTTTCCATCACCTTTGAACCTCCCCGTTATG
	M00842:287:000000000-BGGT4:1:1110:13026:20734	1	168	40	10	1.5	AT	ATATATATATATATATATATACACACACACACACACACAC	NA	1	1	5	67	244	TCCCAACTGTTCATTGTTATGGCATTATTTAAGCCAAACCATATAATGCTTTGGAATCCAAGCTATTTTGAAAACAAAGACTAACATAACatatatatatatatatatatacacacacacacacacacacATATTGTTGCTGCCAAATCACCTAATTGACTTGAGTTACACATAGATATTAAAATTTGGGCTCCTTGATCTGGCTGTGGGAACCTACAAAAGAAGTCTGCTTGCCagagagTGT	TCCCAACTGTTCATTGTTATGGC	ACACTCTCTGGCAAGCAGAC	67	94	78	23	321	20	59.49	59.965	4.4	3.51	3.54419	F	372	ATaaaaaTaaaaaTGAAAGAAGAAATTCatatatAAGGAACAAGATtatataTTATGTTaaaaaaTGCAAAATATAGTCCCAACTGTTCATTGTTATGGCATTATTTAAGCCAAACCATATAATGCTTTGGAATCCAAGCTATTTTGAAAACAAAGACTAACATAACatatatatatatatatatatacacacacacacacacacacATATTGTTGCTGCCAAATCACCTAATTGACTTGAGTTACACATAGATATTAAAATTTGGGCTCCTTGATCTGGCTGTGGGAACCTACAAAAGAAGTCTGCTTGCCagagagTGTCCGATGGGAGActctctGATACTTAAGTCAAAGGATTTGGTAAACAGTAAG
	M00842:287:000000000-BGGT4:1:1110:13039:12062	1	221	10	5	1	AG	GAGAGAGAGA	NA	1	1	5	49	190	CTACTATAATAGTGGAAGGATGGCATTACCTCAGTCAGCAATGGTGATGGTATCTCATTTGGCGAGTACATGATTCGGTGGCTCAAACTAGAGAACGAGAGTGAGAAGgagagagagaGCAagagagGGATGGAGAAAGACTGGTCAGCTTCAAagagagAAGACTGACCACTTAAAGGAGAAAGAGGGA	CTACTATAATAGTGGAAGGATGGCA	TCCCTCTTTCTCCTTTAAGTGGT	83	49	113	25	302	23	57.518	58.76	4.92	4.16	11.7225	B	321	CTCTCCAATGGCCACCATGTCCGTCACGAGCCCGGCTCGAACCTTACCGAGGTTGGGGAGGGGAGAGCAGAATCTCAACCTTCTCTAATGGGAGCCATGCTCCCAtttttCTCTACTATAATAGTGGAAGGATGGCATTACCTCAGTCAGCAATGGTGATGGTATCTCATTTGGCGAGTACATGATTCGGTGGCTCAAACTAGAGAACGAGAGTGAGAAGgagagagagaGCAagagagGGATGGAGAAAGACTGGTCAGCTTCAAagagagAAGACTGACCACTTAAAGGAGAAAGAGGGAGAGGgagagaGGTGACCTC
	M00842:287:000000000-BGGT4:1:1110:13454:15655	1	269	14	7	1	AG	GAGAGAGAGAGAGA	NA	1	1	5	48	174	CCTGCAAGCAAGTCCACATTAGATGAAGATTTGGTGGGAACCCTTCGATGATCAAATCAGCAAGGGTGGCAACAACAGTGTGAAAAGTGgagagagagagagaATGAGACCaaaaaGGGTTGaaaaaTTTCTCTTATAGAGTGGCTAATCCCCAACTTAGTCGGGATTATGTCC	CCTGCAAGCAAGTCCACATT	GGACATAATCCCGACTAAGTTGG	69	48	180	20	353	23	59.036	58.622	2.71	3.77	5.34186	F	383	CGGTAGATCGGAATATGGAGAATAGAgggggATGGTGATGTaaaaaTGAAGTGGAAGGAGGCGATGGATGGTGGAAAGGGATGTTGGGATGCTTGGCAATGATCTTGAAGTCAAAGATGTCCACCGAAGGAGCCAAGATACTGAAGgagagaCATCGCCCCTTAGGTGCACCAGGATATCCTGCAAGCAAGTCCACATTAGATGAAGATTTGGTGGGAACCCTTCGATGATCAAATCAGCAAGGGTGGCAACAACAGTGTGAAAAGTGgagagagagagagaATGAGACCaaaaaGGGTTGaaaaaTTTCTCTTATAGAGTGGCTAATCCCCAACTTAGTCGGGATTATGTCCTTCTTATAGATCACTTGGTACAAATAATTC
	M00842:287:000000000-BGGT4:1:1110:13493:22546	1	121	17	5	1.5	AT	ATATATCATATATATAT	NA	1	1	3	90	239	TGCATGAGGCCTACAGGAATTACCTATTAAGGCAGTTAAGTAACACTAAAatatatAAAGACAGAAATGTAAATCATTTACTAACTTGATCCACACGACCTATCACAAAACCatatatCatatatatatACATCCCCTGTTTATTTTATGCACAATGTTGATTTCATTTTATTTTCCCACCCCATTTTCTATCTTTCCCCAGGCCACTCAAGGCATCTCAAACTGTGGGTGGTCATGCT	TGCATGAGGCCTACAGGAAT	AGCATGACCACCCACAGTTT	92	90	9	20	247	20	58.784	59.814	3.01	2.66	1.40196	B	274	CTAAAATTTGCATGAGGCCTACAGGAATTACCTATTAAGGCAGTTAAGTAACACTAAAatatatAAAGACAGAAATGTAAATCATTTACTAACTTGATCCACACGACCTATCACAAAACCatatatCatatatatatACATCCCCTGTTTATTTTATGCACAATGTTGATTTCATTTTATTTTCCCACCCCATTTTCTATCTTTCCCCAGGCCACTCAAGGCATCTCAAACTGTGGGTGGTCATGCTATCTATCACCTATAGAATAGaaaaaaT
	M00842:287:000000000-BGGT4:1:1110:14259:21048	1	167	12	6	1	AC	ACACACACACAC	NA	1	1	4	1	104	AACTGCAAATGGTTTCGCAAAacacacacacacAAAGCAATACATaaaaaaGGGCATCATGCACGAGGCTCCCACCATTGTAgggggCTAGATGTATGCAGCCT	AACTGCAAATGGTTTCGCAA	AGGCTGCATACATCTAGCCC	1	51	146	20	249	20	57.407	59.31	4.85	5.19	3.28297	F	261	ATTATCATTTTGAAGATCAGATATTATTGAATGGTGAACACCCTCTTTTGCTCTCAAAACAACCAATATCAGCAAGAAAACACAGTTATGCaaaaaaGCAAAAGGGATATGCGATTCTTTTAACCAATTTAAGGAACCAAATGAAAACTGCAAATGGTTTCGCAAAacacacacacacAAAGCAATACATaaaaaaGGGCATCATGCACGAGGCTCCCACCATTGTAgggggCTAGATGTATGCAGCCTTACCCCTTCGTG
	M00842:287:000000000-BGGT4:1:1110:14309:14804	1	219	10	5	1	AG	TCTCTCTCTC	NA	1	1	3	4	90	TCGTGCAGAGAATACCCATGTCAATtctctctctcATTTAGCCACTTTATCCCCTAGTCTATTTGGGTGAATGCTTGTCGAATACCTTGA	TCGTGCAGAGAATACCCATGT	TCAAGGTATTCGACAAGCATTCA	4	32	194	21	283	23	59.169	58.425	3.21	2.57	6.406	A	283	AGGCTTTATTGGTAGGGGTGAAAATAGCCAAAGAACTCAGTGTAGaaaaaCTAAAAGTATTCTCTGACTCTCAGCTAATAGTTAGACAAGTTAAAGGCCAATTTGAAGCTAAAGGTCTAGCTATAGCTAAGTACCTTCAAAAGCTACGAGATCTTATATCGACCTTCTGATATTTTGAGATCTTCTATATTTCTCGTGCAGAGAATACCCATGTCAATtctctctctcATTTAGCCACTTTATCCCCTAGTCTATTTGGGTGAATGCTTGTCGAATACCTTGA
	M00842:287:000000000-BGGT4:1:1110:15084:27738	1	91	10	5	1	AG	CTCTCTCTCT	NA	1	1	4	47	298	TGGTGGATTTAAGTGAGAAATGGTTCAATGGATGGGGAACAGGGAAGACTCTAGTTTGATCTAGATCTCAActctctctctCAAAGGAGATGCTAGAATAAGGACTTagagagGTGCCTTTTCTCGAGTACCATTTTGTTGTGGTGTCCTCACCAAGACCCGAGTCGGATTCCACGTGAACCTCCCAAAAGCTAATGTGGTAGAGGGAGATAGTGGAGATgaagaagaaATATGGAGGGAGTCGACGGATAGGATGgagagaTGGATAAAAGGAAAGAGTTGACGAGCAAGGCAAGTG	TGGTGGATTTAAGTGAGAAATGGT	CACTTGCCTTGCTCGTCAAC	47	197	20	24	317	20	58.36	60.041	3.55	3.18	5.6811	B	367	CTTTCTGTAAAGGAAGTCATGGTGGATTTAAGTGAGAAATGGTTCAATGGATGGGGAACAGGGAAGACTCTAGTTTGATCTAGATCTCAActctctctctCAAAGGAGATGCTAGAATAAGGACTTagagagGTGCCTTTTCTCGAGTACCATTTTGTTGTGGTGTCCTCACCAAGACCCGAGTCGGATTCCACGTGAACCTCCCAAAAGCTAATGTGGTAGAGGGAGATAGTGGAGATgaagaagaaATATGGAGGGAGTCGACGGATAGGATGgagagaTGGATAAAAGGAAAGAGTTGACGAGCAAGGCAAGTGAGGTagagagTCTATGAAATAGCTCCGTAGTCAGGGATGCGGTGTTGTAG
	M00842:287:000000000-BGGT4:1:1110:15947:17214	1	77	24	12	1	AG	AGAGAGAGAGAGAGAGAGAGAGAG	NA	1	1	2	12	101	GGATACCTATGCTGGTCGCCTCCCCTCCCTTTTGTATCaaaaaagagagagagagagagagagagagAAGGATGGAGAAAGGATTTGTGAATGTTGCGAGA	GGATACCTATGCTGGTCGCC	TCTCGCAACATTCACAAATCCT	23	12	34	20	134	22	60.037	58.589	5.54	3.24	3.44868	F	179	AGGATTAGGGGCCCTTATGGTTACATCCAGAGGGGATACCTATGCTGGTCGCCTCCCCTCCCTTTTGTATCaaaaaagagagagagagagagagagagagAAGGATGGAGAAAGGATTTGTGAATGTTGCGAGATATGATATGAAGGGCCTCTCATAATAAAGTTTAAATGTGATTGAG
	M00842:287:000000000-BGGT4:1:1110:16168:6764	1	67	16	8	1	AG	AGAGAGAGAGAGAGAG	NA	1	1	3	2	101	ggtggtgCTCGATGATTGGAagagagAAagagagACAGGGAGGGAAACagagagATGAAAGACagagagagagagagagATAGTGACGGGTGAGAAGAGGG	GGTGGTGCTCGATGATTGGA	CCCTCTTCTCACCCGTCACT	43	2	4	20	104	20	60.108	60.901	3.53	3.41	1.00835	F	189	AgtggtggtgCTCGATGATTGGAagagagAAagagagACAGGGAGGGAAACagagagATGAAAGACagagagagagagagagATAGTGACGGGTGAGAAGAGGGCgggggggggggATTCCCTCTGCCTCGCGAGCGTCCCAGAAGCTTCTGGGCACTTTGTGAGGCATCAATCACCTCAGCCTAGTAA
	M00842:287:000000000-BGGT4:1:1110:16196:14299	1	26	10	5	1	AG	AGAGAGAGAG	NA	1	1	4	3	119	AGTTCTTTGTCTAGCATCTCCCCTAagagagagagTTGAGATCCAAATTAAATTAGAGTCTCCTCCATTTTCCATCTATTGAGTCGCTCTTTACTTGAACCCACCATGGCTTCTCCCAT	AGTTCTTTGTCTAGCATCTCCC	ATGGGAGAAGCCATGGTGG	3	65	1	22	119	19	57.52	59.383	4.3	4.61	6.09671	A	442	AGTTCTTTGTCTAGCATCTCCCCTAagagagagagTTGAGATCCAAATTAAATTAGAGTCTCCTCCATTTTCCATCTATTGAGTCGCTCTTTACTTGAACCCACCATGGCTTCTCCCATAAAAGAAAATATTAGTGTcacacaAGAGCAATTTAATTTGTATATCCAGCAAATGCAGGCTCTGGCTAGCACTATCACCAACCTATAAAGACCTGCCACCTGTGACCCACCAGGAcccccTCGTCCTGTAGCAAACACTCAAGATGTCACCTTCGGACACCAGTCGAGAGGTCGACCACCTCCTGCAACTTCAACTTCTCATGGGCACAAAGAGATGCACAAACACTTCTAGGCCCCGCGTTCCCTTAGTCCCATGTCCTAGGGCTATTCATCTGTTGAT…
	M00842:287:000000000-BGGT4:1:1110:16374:15602	1	132	20	5	1	AAAG	AGAAAGAAAGAAAGAAAGAA	NA	1	1	4	24	172	ATGTGGATTGCCCTAAGCTTAGTAACCAAGTCTCTACACCTACGTCAAGTATGGAGGTTCATGACATATGATAAAGGGAAAGCTAGGATGCTCAGCACTaaaaaaTagaaagaaagaaagaaagaaAGGGaaaaaaagagagagaAAAATTCAGACAGTGTGAAAGCTACCT	ATGTGGATTGCCCTAAGCTT	AGGTAGCTTTCACACTGTCTGA	86	24	26	20	197	22	57.165	59.034	3.74	3.27	5.80047	F	253	AATAAAAGTGCAAAACACAGAGTATATGTGGATTGCCCTAAGCTTAGTAACCAAGTCTCTACACCTACGTCAAGTATGGAGGTTCATGACATATGATAAAGGGAAAGCTAGGATGCTCAGCACTaaaaaaTagaaagaaagaaagaaagaaAGGGaaaaaaagagagagaAAAATTCAGACAGTGTGAAAGCTACCTTAATTCATGAACTTAATTTAGGGGTATACAGAAAATTAACCAAAATAAGTGATAAG
	M00842:287:000000000-BGGT4:1:1110:17058:18827	1	27	10	5	1	AT	ATATATATAT	NA	1	1	6	4	115	CCATGGacaacaacaAATTGCTGTTAatatatatatTGGATCAAATTTAAACTGTAACTCTTCTTTAAGGATCTAGTCTAATaaaaaaTAAAACCTCAACCTCTAACATAAGCGA	CCATGGACAACAACAAATTGCT	TCGCTTATGTTAGAGGTTGAGGT	4	56	1	22	115	23	58.269	59.232	3.91	3.85	7.49876	F	255	CCATGGacaacaacaAATTGCTGTTAatatatatatTGGATCAAATTTAAACTGTAACTCTTCTTTAAGGATCTAGTCTAATaaaaaaTAAAACCTCAACCTCTAACATAAGCGAAAAGATGAAGCTGCTCAAATTCTCAGCATAGAGATAACCAATATGAAATATGAGGCCATaaaaaTGAAATTCACAGCATCCTGATCTATGCTATTGAAAGAAACATGGTCCTGAAATCTCGGAAATTGGGTGACAGACAT
	M00842:287:000000000-BGGT4:1:1110:17245:4767	1	92	82	7	2	AC	ATACATATACATATACATATACTTATATATATACACACACACATACATACATATATACTTACACACACACACACATATATAT	NA	1	1	2	44	211	CGAGTCTGCTGTGATGTGGTCAGCCAATTGAGTTTGGGGTCGACCAGATAAGATGGGTTTTCCAAatacatatacatatacatATACTtatatatatacacacacacaTACATACatatatACTTacacacacacacacatatatatAAGAATAAAAGCATTCTTGGATAAGATTTTCTTCACTATTTTAATAGCAGAGGTTCCTATGGCT	CGAGTCTGCTGTGATGTGGT	AGCCATAGGAACCTCTGCTA	45	44	27	20	237	20	60.038	57.521	4.16	3.49	2.51675	D	247	AATTACCCAGTGATTTTGCTTGTGTCCGAGTCTGCTGTGATGTGGTCAGCCAATTGAGTTTGGGGTCGACCAGATAAGATGGGTTTTCCAAatacatatacatatacatATACTtatatatatacacacacacaTACATACatatatACTTacacacacacacacatatatatAAGAATAAAAGCATTCTTGGATAAGATTTTCTTCACTATTTTAATAGCAGAGGTTCCTATGGCTATACTTCTTA
	M00842:287:000000000-BGGT4:1:1110:18168:4386	1	58	15	5	1	AGG	AGGAGGAGGAGGAGG	NA	1	1	5	8	300	AAAGGCCCAGGCTGGAAGCCAGTAAGCaggaggaggaggaggAGCAGGAGGAGCCTACTGACTGCAAGGCCCCAACCATCAGCCAGCCATGCCCAGCAGCCTTGGTGCATCAAACCAGGAAACAAGTAGAAGAAAAGCCAAGCAGGGAATAGGAGACTAGCTTACaggaggaggAAGAAGAAAGGAAGAAAGAGAAAACTaaaaaaCCAATAACAAACATCTTCCCGGGCCCTGCCACTGgctgctgctGTCAATTTTGCTGCTCAACACCACCGATAGAGCCACCAGCTGCCTTTGATC	AAAGGCCCAGGCTGGAAGC	GATCAAAGGCAGCTGGTGG	8	239	31	19	330	19	62.894	58.813	3.86	4.61	6.08103	F	438	GTAGATCGGAAGAGTAGGAGaaaaaGGAGAAAAGGCCCAGGCTGGAAGCCAGTAAGCaggaggaggaggaggAGCAGGAGGAGCCTACTGACTGCAAGGCCCCAACCATCAGCCAGCCATGCCCAGCAGCCTTGGTGCATCAAACCAGGAAACAAGTAGAAGAAAAGCCAAGCAGGGAATAGGAGACTAGCTTACaggaggaggAAGAAGAAAGGAAGAAAGAGAAAACTaaaaaaCCAATAACAAACATCTTCCCGGGCCCTGCCACTGgctgctgctGTCAATTTTGCTGCTCAACACCACCGATAGAGCCACCAGCTGCCTTTGATCAAACTCCCACAGCAACCTGGGTCAGTGTAGGATCTGCTGCTTGATTTCGCAGGGTTACAGAAACCAAAA…
	M00842:287:000000000-BGGT4:1:1110:18372:9770	1	137	15	5	1	AGG	GAGGAGGAGGAGGAG	NA	1	1	3	64	225	GCATGCACGAAGTTCTACACTATGTGATAAGGAAGCAAAGGACACATTTTAACCAAGTGTGCTGCTCATATGACTTGAAACTATATTCATTGTTaaaaaTTATGATCCACTATATGATGCAgaggaggaggaggagGACGGCAACAATGTTCGTTGTTAAAATTATCACCAACCGGTTGTTTCCATAGACTTCTGTaaaaaCACCGTATTATGTTAAgtgtgtgt	GCATGCACGAAGTTCTACACT	ACACACACTTAACATAATACGGTGT	100	64	16	21	240	25	58.931	58.775	3.55	4.16	8.29459	F	269	TGAGTTAGCATGAAAGCATGCACGAAGTTCTACACTATGTGATAAGGAAGCAAAGGACACATTTTAACCAAGTGTGCTGCTCATATGACTTGAAACTATATTCATTGTTaaaaaTTATGATCCACTATATGATGCAgaggaggaggaggagGACGGCAACAATGTTCGTTGTTAAAATTATCACCAACCGGTTGTTTCCATAGACTTCTGTaaaaaCACCGTATTATGTTAAgtgtgtgtGAAAATCAAAGCAAATATTATAATAGAAT
	M00842:287:000000000-BGGT4:1:1110:19076:15679	1	119	42	21	1	AC	GTGTGTGTGTGTGTGTGTGTGTGTGTGTGTGTGTGTGTGTGT	NA	1	1	5	33	190	CCCGTGTTGATATGGGTATGtatataTGtatataTGAATCGACCGTGTGGGCCAAAATAGACAAATGGAGACTTAGATGTAGTTTCTTATTTTGgtgtgtgtgtgtgtgtgtgtgtgtgtgtgtgtgtgtgtgtgtATGTAGGTTGTTATTTGTTATAGCCAAACCACCTGAGCTAGTTTGGGTCGAGTA	CCCGTGTTGATATGGGTATGT	TACTCGACCCAAACTAGCTCA	73	33	25	21	214	21	57.515	58.201	2.29	4.26	6.28448	F	222	GTAAATAGAACTTCCTAGTTTTGACCCGTGTTGATATGGGTATGtatataTGtatataTGAATCGACCGTGTGGGCCAAAATAGACAAATGGAGACTTAGATGTAGTTTCTTATTTTGgtgtgtgtgtgtgtgtgtgtgtgtgtgtgtgtgtgtgtgtgtATGTAGGTTGTTATTTGTTATAGCCAAACCACCTGAGCTAGTTTGGGTCGAGTATGAGTTTG
	M00842:287:000000000-BGGT4:1:1110:20055:24845	1	144	19	5	1.5	AG	CTCTCTCTTTCTCTCTCTC	NA	1	1	4	53	223	CAATCGTCCGCATGAAGCAGGTGATACTCGATCGCCTTGTGAAGGCGGTGGCCACCACGGCCACCATGCGTGGCGACGACCGCCCTGTGAGGCGGTAATCTGGGCTACCTCTTAGAGGTCGCCACGATTCCctctctctTtctctctctcTTCCCTTTCTcacacaCCCTCACCTCCCTCACTGAGCCTGTACTCTTCACAACTACCGGAACCTATGCATGCC	CAATCGTCCGCATGAAGCAG	GGCATGCATAGGTTCCGGTA	111	53	13	20	235	20	59.973	59.892	4.24	4.02	0.135025	B	445	AGAGGTGACCTGCAATCGTCCGCATGAAGCAGGTGATACTCGATCGCCTTGTGAAGGCGGTGGCCACCACGGCCACCATGCGTGGCGACGACCGCCCTGTGAGGCGGTAATCTGGGCTACCTCTTAGAGGTCGCCACGATTCCctctctctTtctctctctcTTCCCTTTCTcacacaCCCTCACCTCCCTCACTGAGCCTGTACTCTTCACAACTACCGGAACCTATGCATGCCaaaaaTTGGAGCTTGCCGCCAGTGAAGAGGCTAGTTTAAGgtgtgtTCCAtctctcCTtctctcTTTGGACCAAtttttCGACCGTCGGCCACCCGAACCGGTGGTATTTAATCGaaaaaaGGGGAAAATCCCCTGTTTCTTCTTGCCGGCCGACCGTCCTCCC…
[truncated: 1,043 more rows]
